# Supplementary material
Source: Research Square preprint supplement (doi:10.21203/rs.3.rs-9199400/v1)
Supplement: Supplementary file 1 [file 240e2f2b0cdd77dfbe7b697c.docx]

**Somatic mutations trace the global spread and microevolution of Cavendish bananas**

Yeonjin Kim1,*, Jinhee Ryu1,*, Ha-on Lim2,15, Taeyoung Im2,16, Yewon Jeon2,17, Hansol Park1,3, Hyein Won1, Jinsil Jeong1, Jisong An1, Beomki Lee1, Chang Hyun Nam1, Jun Kim4, Jeong Seok Lee1,3, Thomas Bleazard5, Minsung Kim6, Seunghoon Kang7, Heechan Kim8, Yonghoon Kim9, Youngwoo Choo10, Mariano Hernandez11,12, José A. Pérez11,12, Leonardo J. Amador13, Ian Bell14, Faye Tuffrey14, and Young Seok Ju1,3

**Affiliations:**

1. Graduate School of Medical Science and Engineering, Korea Advanced Institute of Science and Technology, Daejeon 34051, Republic of Korea

2. Daejeon Science High School for the Gifted, Daejeon 34142, Republic of Korea

3. Inocras Inc, San Diego, CA 92126, USA

4. Department of Convergent Bioscience and Informatics, College of Bioscience and Biotechnology, Chungnam National University, Daejeon 34134, Republic of Korea

5. Independent Researcher, Manchester, UK

6. Faculty of Biology, Medicine and Health, University of Manchester, Manchester M13 9PL, UK

7. Allbanana Inc., Sanchung-gun, Gyeongsangnam-do 52256, Republic of Korea

8. JDTech Inc., Jeju-si, Jeju-do 63328, Republic of Korea

9. Yujinfang Inc., Seogwipo-si, Jeju-do 63616, Republic of Korea

10. University of Technology Sydney, Faculty of Engineering and IT, School of Civil and Environmental Engineering, Ultimo, New South Wales 2007, Australia

11. Instituto Universitario de Enfermedades Tropicales y Salud Pública de Canarias, Universidad de La Laguna, La Laguna, Santa Cruz de Tenerife, Islas Canarias, Spain

12. Departamento de Bioquímica, Microbiología, Biología Celular y Genética, Universidad de La Laguna, La Laguna, Santa Cruz de Tenerife, Islas Canarias, Spain

13. Cultivos y TecnologÍa Agraria de Tenerife S.A. (CULTESA), Ctra. de Guayonje 68, 38350 Tacoronte, Santa Cruz de Tenerife, Islas Canarias, Spain

14. Chatsworth House Trust Charity, The Estate Office, Bakewell, DE45 1PJ, UK

*Co-first authors with equal contribution

Present addresses:

15. School of Biological Sciences, Seoul National University, Seoul 08826, Republic of Korea

16. Department of Forest Sciences, Seoul National University, Seoul 08826, Republic of Korea

17. College of Medicine, Gachon University, Incheon 21999, Republic of Korea

**Correspondence to:**

Young Seok Ju, MD, PhD

Professor,
Graduate School of Medical Science and Engineering, Korea Advanced Institute of Science and Technology, Daejeon 34051, Republic of Korea [ysju@kaist.ac.kr](mailto:ysju@kaist.ac.kr) +82-42-350-0224

**Supplementary Discussion 1. Non-polymorphic variants in Cavendish bananas**

To ensure the high fidelity of our comprehensive genomic analysis, we established a rigorous pipeline to identify nonpolymorphic variants specifically fixed within the Cavendish subgroup. We initially performed variant calling and filtering on sequencing data from 144 Cavendish banana accessions, following the pipeline described in the Methods section. The resulting filtered variants were merged to create a comprehensive union set of potential genomic variations.

To isolate variants that have been accumulated and fixed within, not in the DH-Pahang lineage (which provided the reference genome sequences) but in the Cavendish banana lineage, we incorporated two publicly available Gros Michel sequencing datasets as outgroups[22,27](https://paperpile.com/c/zLGG05/DYhL+W3cb). To identify genomic variants in Gros Michel bananas relative to the DH-Pahang reference genome, we applied the same variant-calling and filtering pipeline used for the Cavendish samples. For each candidate variant in the combined (union) variant set, we annotated variant allele frequencies (VAFs) across both Cavendish and Gros Michel samples. To curate a high-confidence set of non-polymorphic variants specific to Cavendish bananas, we selected variants present in all Cavendish samples with a VAF >10%, while requiring a VAF of 0 in both Gros Michel genomes.

To reduce false positives arising from mapping artifacts, we implemented an additional layer of quality control based on genomic mappability. Variants located in low-mappability regions were excluded from the final dataset. Mappability was assessed using both mapping quality (MQ) scores and a custom “purity” metric, defined as the proportion of high-quality, concordant reads supporting the locus.

We identified 963,253 non-polymorphic genomic variants (comprising 868,448 SNVs and 94,805 indels) that are likely to have accumulated along the Cavendish banana lineage after splitting from Gros Michel. The mutational spectrum of these SNVs exhibited a high degree of concordance, with the SBS-A with a cosine similarity of 0.954 (Extended Data Fig. 3).
