# Supplementary material
Source: Research Square preprint supplement (doi:10.21203/rs.3.rs-9199400/v1)
Supplement: Supplementary file 2 [file 3cd458e49dc762ffd3149baa.xlsx]

## Sheet: Sheet1
Supplementary Table 3. The list of non-polymorphic mutations detected in Cavendish bananas
Columns indicate chromosome (CHROM), genomic position (POS), reference allele (REF), alternative allele (ALT), and gene annotation predicted by Ensembl Variant Effect Predictor (GeneAnnotation). For each variant, gene name, consequence, cDNA position, CDS position, protein position, amino acid change, and codon change are concatenated using “:” as a delimiter. When multiple annotations are presen…
CHROM	POS	REF	ALT	GeneAnnotation
chr01	45575	G	T	Macma4_01_g00020:intron_variant:-:-:-:-:-
chr01	55430	G	A	Macma4_01_g00020:downstream_gene_variant:-:-:-:-:-, Macma4_01_g00030:upstream_gene_variant:-:-:-:-:-
chr01	72209	T	A
chr01	76147	A	AT
chr01	76751	C	A
chr01	78116	A	G
chr01	82987	C	A
chr01	82988	A	G
chr01	166577	TCCTTTC	T	Macma4_01_g00050:downstream_gene_variant:-:-:-:-:-, Macma4_01_g00060:5_prime_UTR_variant:74-79:-:-:-:-
chr01	276818	C	T	Macma4_01_g00200:downstream_gene_variant:-:-:-:-:-, Macma4_01_g00210:intron_variant:-:-:-:-:-
chr01	481569	G	A	Macma4_01_g00560:intron_variant:-:-:-:-:-
chr01	512156	G	A	Macma4_01_g00590:downstream_gene_variant:-:-:-:-:-, Macma4_01_g00600:stop_gained:2356:2131:711:R/*:Cga/Tga
chr01	541871	G	A
chr01	623867	G	A	Macma4_01_g00730:intron_variant:-:-:-:-:-
chr01	822454	G	A	Macma4_01_g01090:upstream_gene_variant:-:-:-:-:-
chr01	832234	A	AT	Macma4_01_g01090:downstream_gene_variant:-:-:-:-:-, Macma4_01_g01100:upstream_gene_variant:-:-:-:-:-
chr01	937098	G	A	Macma4_01_g01290:downstream_gene_variant:-:-:-:-:-
chr01	969084	CCCGACCCGATTTAACCAAAACCGCTTTACTGAT	C	Macma4_01_g01330:upstream_gene_variant:-:-:-:-:-, Macma4_01_g01340:downstream_gene_variant:-:-:-:-:-
chr01	1023149	G	A	Macma4_01_g01380:intron_variant:-:-:-:-:-
chr01	1122394	C	G	Macma4_01_g01530:upstream_gene_variant:-:-:-:-:-, Macma4_01_g01540:downstream_gene_variant:-:-:-:-:-
chr01	1123013	C	A	Macma4_01_g01530:upstream_gene_variant:-:-:-:-:-, Macma4_01_g01540:downstream_gene_variant:-:-:-:-:-
chr01	1123049	GAGTGATC	G	Macma4_01_g01530:upstream_gene_variant:-:-:-:-:-, Macma4_01_g01540:downstream_gene_variant:-:-:-:-:-
chr01	1123125	G	A	Macma4_01_g01530:upstream_gene_variant:-:-:-:-:-, Macma4_01_g01540:downstream_gene_variant:-:-:-:-:-
chr01	1196563	A	T	Macma4_01_g01700:downstream_gene_variant:-:-:-:-:-, Macma4_01_g01710:downstream_gene_variant:-:-:-:-:-
chr01	1334004	G	T	Macma4_01_g01970:intron_variant:-:-:-:-:-
chr01	1462940	C	T	Macma4_01_g02200:upstream_gene_variant:-:-:-:-:-, Macma4_01_g02210:upstream_gene_variant:-:-:-:-:-, Macma4_01_g02220:upstream_gene_variant:-:-:-:-:-
chr01	1463111	CTCCG	C	Macma4_01_g02200:upstream_gene_variant:-:-:-:-:-, Macma4_01_g02210:upstream_gene_variant:-:-:-:-:-, Macma4_01_g02220:upstream_gene_variant:-:-:-:-:-
chr01	1463124	G	T	Macma4_01_g02200:upstream_gene_variant:-:-:-:-:-, Macma4_01_g02210:upstream_gene_variant:-:-:-:-:-, Macma4_01_g02220:upstream_gene_variant:-:-:-:-:-
chr01	1463129	CCCT	C	Macma4_01_g02200:upstream_gene_variant:-:-:-:-:-, Macma4_01_g02210:upstream_gene_variant:-:-:-:-:-, Macma4_01_g02220:upstream_gene_variant:-:-:-:-:-
chr01	1495416	T	C	Macma4_01_g02260:downstream_gene_variant:-:-:-:-:-, Macma4_01_g02270:downstream_gene_variant:-:-:-:-:-
chr01	1637146	A	ATAAATATAATTAT	Macma4_01_g02540:upstream_gene_variant:-:-:-:-:-, Macma4_01_g02550:intron_variant:-:-:-:-:-
chr01	1814659	C	G	Macma4_01_g02780:downstream_gene_variant:-:-:-:-:-, Macma4_01_g02790:upstream_gene_variant:-:-:-:-:-, Macma4_01_g02800:downstream_gene_variant:-:-:-:-:-, Macma4_01_g02810:downstream_gene_variant:-:-:-:-:-, Macma4_01_g02820:downstream_gene_variant:-:-:-:-:-
chr01	1866963	TTAAAAATTAGATACAA	T	Macma4_01_g02860:downstream_gene_variant:-:-:-:-:-
chr01	1868096	C	T	Macma4_01_g02860:downstream_gene_variant:-:-:-:-:-, Macma4_01_g02870:upstream_gene_variant:-:-:-:-:-
chr01	1873959	CCTCT	C	Macma4_01_g02870:intron_variant:-:-:-:-:-, Macma4_01_g02880:downstream_gene_variant:-:-:-:-:-
chr01	1902499	G	A	Macma4_01_g02890:downstream_gene_variant:-:-:-:-:-, Macma4_01_g02900:downstream_gene_variant:-:-:-:-:-, Macma4_01_g02910:synonymous_variant:517:279:93:R:cgC/cgT, Macma4_01_g02930:upstream_gene_variant:-:-:-:-:-
chr01	2220537	C	T	Macma4_01_g03460:upstream_gene_variant:-:-:-:-:-, Macma4_01_g03470:downstream_gene_variant:-:-:-:-:-
chr01	2220538	C	T	Macma4_01_g03460:upstream_gene_variant:-:-:-:-:-, Macma4_01_g03470:downstream_gene_variant:-:-:-:-:-
chr01	2220540	C	T	Macma4_01_g03460:upstream_gene_variant:-:-:-:-:-, Macma4_01_g03470:downstream_gene_variant:-:-:-:-:-
chr01	2220544	C	T	Macma4_01_g03460:upstream_gene_variant:-:-:-:-:-, Macma4_01_g03470:downstream_gene_variant:-:-:-:-:-
chr01	2220552	G	T	Macma4_01_g03460:upstream_gene_variant:-:-:-:-:-, Macma4_01_g03470:downstream_gene_variant:-:-:-:-:-
chr01	2498840	TTAGTC	T	Macma4_01_g03850:intron_variant:-:-:-:-:-
chr01	2572396	C	T	Macma4_01_g03970:missense_variant:1341:1273:425:G/S:Ggt/Agt
chr01	2646024	GCGTC	G	Macma4_01_g04040:downstream_gene_variant:-:-:-:-:-, Macma4_01_g04050:downstream_gene_variant:-:-:-:-:-
chr01	2986378	C	T	Macma4_01_g04580:intron_variant:-:-:-:-:-
chr01	3065736	A	ATAATATTATAATATTTTT	Macma4_01_g04670:upstream_gene_variant:-:-:-:-:-, Macma4_01_g04680:upstream_gene_variant:-:-:-:-:-
chr01	3128667	T	C	Macma4_01_g04740:intron_variant:-:-:-:-:-, Macma4_01_g04750:downstream_gene_variant:-:-:-:-:-
chr01	3224658	T	TTA	Macma4_01_g04840:intron_variant:-:-:-:-:-, Macma4_01_g04850:upstream_gene_variant:-:-:-:-:-
chr01	3239080	A	T	Macma4_01_g04860:downstream_gene_variant:-:-:-:-:-, Macma4_01_g04870:downstream_gene_variant:-:-:-:-:-
chr01	3239081	A	T	Macma4_01_g04860:downstream_gene_variant:-:-:-:-:-, Macma4_01_g04870:downstream_gene_variant:-:-:-:-:-
chr01	3239086	G	T	Macma4_01_g04860:downstream_gene_variant:-:-:-:-:-, Macma4_01_g04870:downstream_gene_variant:-:-:-:-:-
chr01	3239090	A	G	Macma4_01_g04860:downstream_gene_variant:-:-:-:-:-, Macma4_01_g04870:downstream_gene_variant:-:-:-:-:-
chr01	3285815	T	A	Macma4_01_g04890:upstream_gene_variant:-:-:-:-:-, Macma4_01_g04910:upstream_gene_variant:-:-:-:-:-, Macma4_01_g04930:downstream_gene_variant:-:-:-:-:-
chr01	3285816	T	C	Macma4_01_g04890:upstream_gene_variant:-:-:-:-:-, Macma4_01_g04910:upstream_gene_variant:-:-:-:-:-, Macma4_01_g04930:downstream_gene_variant:-:-:-:-:-
chr01	3392090	A	G	Macma4_01_g05010:upstream_gene_variant:-:-:-:-:-, Macma4_01_g05020:upstream_gene_variant:-:-:-:-:-
chr01	3511984	T	A	Macma4_01_g05160:upstream_gene_variant:-:-:-:-:-, Macma4_01_g05170:intron_variant:-:-:-:-:-
chr01	3522783	C	T	Macma4_01_g05180:upstream_gene_variant:-:-:-:-:-, Macma4_01_g05190:upstream_gene_variant:-:-:-:-:-
chr01	3540165	A	AT	Macma4_01_g05200:intron_variant:-:-:-:-:-, Macma4_01_g05210:downstream_gene_variant:-:-:-:-:-
chr01	3571913	G	T	Macma4_01_g05240:upstream_gene_variant:-:-:-:-:-, Macma4_01_g05250:upstream_gene_variant:-:-:-:-:-
chr01	3571940	C	A	Macma4_01_g05240:upstream_gene_variant:-:-:-:-:-, Macma4_01_g05250:upstream_gene_variant:-:-:-:-:-
chr01	3571954	G	T	Macma4_01_g05240:upstream_gene_variant:-:-:-:-:-, Macma4_01_g05250:upstream_gene_variant:-:-:-:-:-
chr01	3754817	C	T	Macma4_01_g05420:downstream_gene_variant:-:-:-:-:-, Macma4_01_g05430:downstream_gene_variant:-:-:-:-:-
chr01	3788370	GT	G	Macma4_01_g05430:intron_variant:-:-:-:-:-, Macma4_01_g05440:downstream_gene_variant:-:-:-:-:-
chr01	3849883	C	G	Macma4_01_g05500:upstream_gene_variant:-:-:-:-:-, Macma4_01_g05510:downstream_gene_variant:-:-:-:-:-, Macma4_01_g05520:upstream_gene_variant:-:-:-:-:-, Macma4_01_g05530:downstream_gene_variant:-:-:-:-:-
chr01	3849960	A	G	Macma4_01_g05500:upstream_gene_variant:-:-:-:-:-, Macma4_01_g05510:downstream_gene_variant:-:-:-:-:-, Macma4_01_g05520:upstream_gene_variant:-:-:-:-:-, Macma4_01_g05530:downstream_gene_variant:-:-:-:-:-
chr01	3849968	T	G	Macma4_01_g05500:upstream_gene_variant:-:-:-:-:-, Macma4_01_g05510:downstream_gene_variant:-:-:-:-:-, Macma4_01_g05520:upstream_gene_variant:-:-:-:-:-, Macma4_01_g05530:downstream_gene_variant:-:-:-:-:-
chr01	3849969	G	A	Macma4_01_g05500:upstream_gene_variant:-:-:-:-:-, Macma4_01_g05510:downstream_gene_variant:-:-:-:-:-, Macma4_01_g05520:upstream_gene_variant:-:-:-:-:-, Macma4_01_g05530:downstream_gene_variant:-:-:-:-:-
chr01	3849976	A	T	Macma4_01_g05500:upstream_gene_variant:-:-:-:-:-, Macma4_01_g05510:downstream_gene_variant:-:-:-:-:-, Macma4_01_g05520:upstream_gene_variant:-:-:-:-:-, Macma4_01_g05530:downstream_gene_variant:-:-:-:-:-
chr01	3849982	T	C	Macma4_01_g05500:upstream_gene_variant:-:-:-:-:-, Macma4_01_g05510:downstream_gene_variant:-:-:-:-:-, Macma4_01_g05520:upstream_gene_variant:-:-:-:-:-, Macma4_01_g05530:downstream_gene_variant:-:-:-:-:-
chr01	3849983	G	A	Macma4_01_g05500:upstream_gene_variant:-:-:-:-:-, Macma4_01_g05510:downstream_gene_variant:-:-:-:-:-, Macma4_01_g05520:upstream_gene_variant:-:-:-:-:-, Macma4_01_g05530:downstream_gene_variant:-:-:-:-:-
chr01	3850011	A	G	Macma4_01_g05500:upstream_gene_variant:-:-:-:-:-, Macma4_01_g05510:downstream_gene_variant:-:-:-:-:-, Macma4_01_g05520:upstream_gene_variant:-:-:-:-:-, Macma4_01_g05530:downstream_gene_variant:-:-:-:-:-
chr01	3850013	G	A	Macma4_01_g05500:upstream_gene_variant:-:-:-:-:-, Macma4_01_g05510:downstream_gene_variant:-:-:-:-:-, Macma4_01_g05520:upstream_gene_variant:-:-:-:-:-, Macma4_01_g05530:downstream_gene_variant:-:-:-:-:-
chr01	3850015	G	A	Macma4_01_g05500:upstream_gene_variant:-:-:-:-:-, Macma4_01_g05510:downstream_gene_variant:-:-:-:-:-, Macma4_01_g05520:upstream_gene_variant:-:-:-:-:-, Macma4_01_g05530:downstream_gene_variant:-:-:-:-:-
chr01	3850034	A	G	Macma4_01_g05500:upstream_gene_variant:-:-:-:-:-, Macma4_01_g05510:downstream_gene_variant:-:-:-:-:-, Macma4_01_g05520:upstream_gene_variant:-:-:-:-:-, Macma4_01_g05530:downstream_gene_variant:-:-:-:-:-
chr01	3850063	T	TC	Macma4_01_g05500:upstream_gene_variant:-:-:-:-:-, Macma4_01_g05510:downstream_gene_variant:-:-:-:-:-, Macma4_01_g05520:upstream_gene_variant:-:-:-:-:-, Macma4_01_g05530:downstream_gene_variant:-:-:-:-:-
chr01	3859120	G	A	Macma4_01_g05530:upstream_gene_variant:-:-:-:-:-, Macma4_01_g05540:downstream_gene_variant:-:-:-:-:-, Macma4_01_g05550:downstream_gene_variant:-:-:-:-:-
chr01	4477030	T	G	Macma4_01_g06390:downstream_gene_variant:-:-:-:-:-, Macma4_01_g06400:intron_variant:-:-:-:-:-
chr01	4572027	A	G	Macma4_01_g06470:intron_variant:-:-:-:-:-
chr01	5077789	C	G	Macma4_01_g07090:intron_variant:-:-:-:-:-
chr01	5126905	T	C	Macma4_01_g07160:intron_variant:-:-:-:-:-
chr01	5152968	G	A	Macma4_01_g07180:upstream_gene_variant:-:-:-:-:-, Macma4_01_g07190:downstream_gene_variant:-:-:-:-:-
chr01	5255511	A	C	Macma4_01_g07290:downstream_gene_variant:-:-:-:-:-, Macma4_01_g07300:upstream_gene_variant:-:-:-:-:-, Macma4_01_g07310:upstream_gene_variant:-:-:-:-:-
chr01	5307968	G	A	Macma4_01_g07380:upstream_gene_variant:-:-:-:-:-, Macma4_01_g07390:downstream_gene_variant:-:-:-:-:-, Macma4_01_g07400:upstream_gene_variant:-:-:-:-:-, Macma4_01_g07410:downstream_gene_variant:-:-:-:-:-
chr01	5564774	C	T	Macma4_01_g07700:downstream_gene_variant:-:-:-:-:-, Macma4_01_g07710:downstream_gene_variant:-:-:-:-:-, Macma4_01_g07720:intron_variant:-:-:-:-:-
chr01	5605845	T	A	Macma4_01_g07760:downstream_gene_variant:-:-:-:-:-, Macma4_01_g07770:upstream_gene_variant:-:-:-:-:-
chr01	5606551	A	G	Macma4_01_g07760:downstream_gene_variant:-:-:-:-:-, Macma4_01_g07770:upstream_gene_variant:-:-:-:-:-
chr01	5937702	CA	C	Macma4_01_g08260:frameshift_variant:3318:3126:1042:S/X:tcA/tc, Macma4_01_g08270:downstream_gene_variant:-:-:-:-:-
chr01	5937704	C	T	Macma4_01_g08260:missense_variant:3319:3127:1043:P/S:Cca/Tca, Macma4_01_g08270:downstream_gene_variant:-:-:-:-:-
chr01	5950262	C	A	Macma4_01_g08270:upstream_gene_variant:-:-:-:-:-, Macma4_01_g08280:upstream_gene_variant:-:-:-:-:-, Macma4_01_g08290:downstream_gene_variant:-:-:-:-:-
chr01	5983845	A	G	Macma4_01_g08330:downstream_gene_variant:-:-:-:-:-, Macma4_01_g08340:downstream_gene_variant:-:-:-:-:-, Macma4_01_g08350:downstream_gene_variant:-:-:-:-:-, Macma4_01_g08360:upstream_gene_variant:-:-:-:-:-, Macma4_01_g08370:downstream_gene_variant:-:-:-:-:-
chr01	6004301	C	T	Macma4_01_g08400:downstream_gene_variant:-:-:-:-:-, Macma4_01_g08410:downstream_gene_variant:-:-:-:-:-, Macma4_01_g08420:downstream_gene_variant:-:-:-:-:-
chr01	6069204	T	G	Macma4_01_g08490:downstream_gene_variant:-:-:-:-:-, Macma4_01_g08500:upstream_gene_variant:-:-:-:-:-
chr01	6069211	A	G	Macma4_01_g08490:downstream_gene_variant:-:-:-:-:-, Macma4_01_g08500:upstream_gene_variant:-:-:-:-:-
chr01	6285877	A	G	Macma4_01_g08810:intron_variant:-:-:-:-:-
chr01	6336570	A	AC	Macma4_01_g08860:upstream_gene_variant:-:-:-:-:-, Macma4_01_g08870:upstream_gene_variant:-:-:-:-:-
chr01	6422987	T	C	Macma4_01_g08990:intron_variant:-:-:-:-:-
chr01	6523703	A	G	Macma4_01_g09120:downstream_gene_variant:-:-:-:-:-, Macma4_01_g09130:downstream_gene_variant:-:-:-:-:-, Macma4_01_g09140:missense_variant:853:853:285:C/R:Tgc/Cgc, Macma4_01_g09150:downstream_gene_variant:-:-:-:-:-
chr01	6550677	G	A	Macma4_01_g09180:upstream_gene_variant:-:-:-:-:-, Macma4_01_g09190:upstream_gene_variant:-:-:-:-:-, Macma4_01_g09200:upstream_gene_variant:-:-:-:-:-, Macma4_01_g09210:upstream_gene_variant:-:-:-:-:-, Macma4_01_g09220:upstream_gene_variant:-:-:-:-:-, Macma4_01_g09230:downstream_gene_variant:-:-:-:-:-
chr01	6899173	G	C	Macma4_01_g09660:downstream_gene_variant:-:-:-:-:-, Macma4_01_g09670:missense_variant:1101:1101:367:F/L:ttC/ttG
chr01	6949113	A	G	Macma4_01_g09730:upstream_gene_variant:-:-:-:-:-, Macma4_01_g09740:upstream_gene_variant:-:-:-:-:-
chr01	7054950	A	G	Macma4_01_g09880:intron_variant:-:-:-:-:-, Macma4_01_g09890:downstream_gene_variant:-:-:-:-:-
chr01	7151777	C	T	Macma4_01_g10080:downstream_gene_variant:-:-:-:-:-, Macma4_01_g10090:synonymous_variant:93:93:31:T:acC/acT
chr01	7158727	G	A	Macma4_01_g10090:intron_variant:-:-:-:-:-
chr01	7275171	A	T	Macma4_01_g10260:downstream_gene_variant:-:-:-:-:-, Macma4_01_g10270:downstream_gene_variant:-:-:-:-:-
chr01	7474373	C	T	Macma4_01_g10600:intron_variant:-:-:-:-:-, Macma4_01_g10610:downstream_gene_variant:-:-:-:-:-
chr01	7474407	C	T	Macma4_01_g10600:intron_variant:-:-:-:-:-, Macma4_01_g10610:downstream_gene_variant:-:-:-:-:-
chr01	7591570	C	T	Macma4_01_g10710:downstream_gene_variant:-:-:-:-:-, Macma4_01_g10720:downstream_gene_variant:-:-:-:-:-
chr01	7692867	CA	C	Macma4_01_g10820:upstream_gene_variant:-:-:-:-:-
chr01	8053045	G	T	Macma4_01_g11380:upstream_gene_variant:-:-:-:-:-
chr01	8158541	A	G	Macma4_01_g11530:downstream_gene_variant:-:-:-:-:-, Macma4_01_g11540:intron_variant:-:-:-:-:-, Macma4_01_g11550:upstream_gene_variant:-:-:-:-:-
chr01	8184212	T	C	Macma4_01_g11570:upstream_gene_variant:-:-:-:-:-, Macma4_01_g11580:upstream_gene_variant:-:-:-:-:-, Macma4_01_g11590:downstream_gene_variant:-:-:-:-:-
chr01	8464712	A	G	Macma4_01_g11890:downstream_gene_variant:-:-:-:-:-, Macma4_01_g11900:intron_variant:-:-:-:-:-
chr01	8464715	A	G	Macma4_01_g11890:downstream_gene_variant:-:-:-:-:-, Macma4_01_g11900:intron_variant:-:-:-:-:-
chr01	8535350	G	A	Macma4_01_g11940:intron_variant:-:-:-:-:-
chr01	8567934	G	A	Macma4_01_g11980:downstream_gene_variant:-:-:-:-:-, Macma4_01_g11990:intron_variant:-:-:-:-:-
chr01	8573902	T	C	Macma4_01_g11990:downstream_gene_variant:-:-:-:-:-, Macma4_01_g12000:downstream_gene_variant:-:-:-:-:-
chr01	8732828	C	T	Macma4_01_g12200:upstream_gene_variant:-:-:-:-:-, Macma4_01_g12210:upstream_gene_variant:-:-:-:-:-, Macma4_01_g12220:upstream_gene_variant:-:-:-:-:-
chr01	8732861	G	A	Macma4_01_g12200:upstream_gene_variant:-:-:-:-:-, Macma4_01_g12210:upstream_gene_variant:-:-:-:-:-, Macma4_01_g12220:upstream_gene_variant:-:-:-:-:-
chr01	8884452	G	A	Macma4_01_g12420:upstream_gene_variant:-:-:-:-:-
chr01	8892853	C	T	Macma4_01_g12420:intron_variant:-:-:-:-:-, Macma4_01_g12430:upstream_gene_variant:-:-:-:-:-
chr01	8909863	G	C	Macma4_01_g12450:upstream_gene_variant:-:-:-:-:-, Macma4_01_g12460:upstream_gene_variant:-:-:-:-:-
chr01	8975559	T	G	Macma4_01_g12560:downstream_gene_variant:-:-:-:-:-
chr01	9312672	T	TC	Macma4_01_g13000:intron_variant:-:-:-:-:-
chr01	9779389	C	T	Macma4_01_g13590:downstream_gene_variant:-:-:-:-:-, Macma4_01_g13600:downstream_gene_variant:-:-:-:-:-, Macma4_01_g13610:3_prime_UTR_variant:515:-:-:-:-
chr01	9781111	A	C	Macma4_01_g13600:downstream_gene_variant:-:-:-:-:-, Macma4_01_g13610:downstream_gene_variant:-:-:-:-:-
chr01	9781429	T	C	Macma4_01_g13600:downstream_gene_variant:-:-:-:-:-, Macma4_01_g13610:downstream_gene_variant:-:-:-:-:-
chr01	9781439	G	A	Macma4_01_g13600:downstream_gene_variant:-:-:-:-:-, Macma4_01_g13610:downstream_gene_variant:-:-:-:-:-
chr01	9781468	C	G	Macma4_01_g13600:downstream_gene_variant:-:-:-:-:-, Macma4_01_g13610:downstream_gene_variant:-:-:-:-:-
chr01	9781501	TCCC	T	Macma4_01_g13600:downstream_gene_variant:-:-:-:-:-, Macma4_01_g13610:downstream_gene_variant:-:-:-:-:-
chr01	9781573	C	T	Macma4_01_g13600:downstream_gene_variant:-:-:-:-:-, Macma4_01_g13610:downstream_gene_variant:-:-:-:-:-
chr01	9781581	G	A	Macma4_01_g13600:downstream_gene_variant:-:-:-:-:-, Macma4_01_g13610:downstream_gene_variant:-:-:-:-:-
chr01	9782017	G	A	Macma4_01_g13600:downstream_gene_variant:-:-:-:-:-, Macma4_01_g13610:downstream_gene_variant:-:-:-:-:-
chr01	9782020	C	T	Macma4_01_g13600:downstream_gene_variant:-:-:-:-:-, Macma4_01_g13610:downstream_gene_variant:-:-:-:-:-
chr01	9782073	C	G	Macma4_01_g13600:downstream_gene_variant:-:-:-:-:-, Macma4_01_g13610:downstream_gene_variant:-:-:-:-:-
chr01	9782081	G	A	Macma4_01_g13600:downstream_gene_variant:-:-:-:-:-, Macma4_01_g13610:downstream_gene_variant:-:-:-:-:-
chr01	9782164	G	A	Macma4_01_g13600:downstream_gene_variant:-:-:-:-:-, Macma4_01_g13610:downstream_gene_variant:-:-:-:-:-
chr01	9782214	C	T	Macma4_01_g13600:downstream_gene_variant:-:-:-:-:-, Macma4_01_g13610:downstream_gene_variant:-:-:-:-:-
chr01	9784886	C	T
chr01	9784916	T	G
chr01	9784923	C	T
chr01	9784925	C	CTTG
chr01	9784932	T	C
chr01	9784966	G	A
chr01	9785003	G	T
chr01	9785037	C	A
chr01	9785130	G	A
chr01	9785138	C	A
chr01	9785140	C	G
chr01	9785141	T	C
chr01	9785258	T	C
chr01	9785282	T	A
chr01	9785284	G	A
chr01	9785286	T	C
chr01	9785368	C	A
chr01	9785390	C	T
chr01	9785398	G	A
chr01	9785422	G	A
chr01	9785446	G	A
chr01	9785479	C	T
chr01	9785531	G	A
chr01	9785560	G	A
chr01	9785750	G	A
chr01	9785778	G	A
chr01	9785790	C	T
chr01	9785797	G	C
chr01	9785804	G	A
chr01	9785805	C	T
chr01	9785831	C	T
chr01	9785851	C	T
chr01	9785911	C	T
chr01	9785933	T	C
chr01	9785939	G	A
chr01	9786012	A	T
chr01	9786020	C	T
chr01	9786022	G	A
chr01	9786062	G	A
chr01	9786102	T	C
chr01	9786126	A	G
chr01	9786128	G	A
chr01	9786146	T	A
chr01	9786163	C	T
chr01	9786230	T	C
chr01	9786272	T	C
chr01	9786298	C	T
chr01	9786393	C	T
chr01	9786441	G	A
chr01	9786460	G	T
chr01	9786506	C	T
chr01	9786520	G	A
chr01	9787011	G	A	Macma4_01_g13620:upstream_gene_variant:-:-:-:-:-
chr01	9787702	G	A	Macma4_01_g13620:upstream_gene_variant:-:-:-:-:-
chr01	9787991	G	A	Macma4_01_g13620:upstream_gene_variant:-:-:-:-:-
chr01	9788004	C	T	Macma4_01_g13620:upstream_gene_variant:-:-:-:-:-
chr01	9788017	C	T	Macma4_01_g13620:upstream_gene_variant:-:-:-:-:-
chr01	9788056	C	T	Macma4_01_g13620:upstream_gene_variant:-:-:-:-:-
chr01	9788061	A	G	Macma4_01_g13620:upstream_gene_variant:-:-:-:-:-
chr01	9788063	C	T	Macma4_01_g13620:upstream_gene_variant:-:-:-:-:-
chr01	9789080	C	T	Macma4_01_g13620:upstream_gene_variant:-:-:-:-:-
chr01	9789161	G	A	Macma4_01_g13620:upstream_gene_variant:-:-:-:-:-
chr01	9789190	G	A	Macma4_01_g13620:upstream_gene_variant:-:-:-:-:-
chr01	9789239	T	C	Macma4_01_g13620:upstream_gene_variant:-:-:-:-:-
chr01	9789383	C	T	Macma4_01_g13620:upstream_gene_variant:-:-:-:-:-
chr01	9789437	G	T	Macma4_01_g13620:upstream_gene_variant:-:-:-:-:-
chr01	9789537	C	A	Macma4_01_g13620:upstream_gene_variant:-:-:-:-:-
chr01	9789555	G	A	Macma4_01_g13620:upstream_gene_variant:-:-:-:-:-
chr01	9789558	C	T	Macma4_01_g13620:upstream_gene_variant:-:-:-:-:-
chr01	9789565	G	T	Macma4_01_g13620:upstream_gene_variant:-:-:-:-:-
chr01	9789566	A	G	Macma4_01_g13620:upstream_gene_variant:-:-:-:-:-
chr01	9789574	A	T	Macma4_01_g13620:upstream_gene_variant:-:-:-:-:-
chr01	9789595	G	A	Macma4_01_g13620:upstream_gene_variant:-:-:-:-:-
chr01	9789605	G	A	Macma4_01_g13620:upstream_gene_variant:-:-:-:-:-
chr01	9789630	G	A	Macma4_01_g13620:upstream_gene_variant:-:-:-:-:-
chr01	9789668	T	C	Macma4_01_g13620:upstream_gene_variant:-:-:-:-:-
chr01	9789699	G	A	Macma4_01_g13620:upstream_gene_variant:-:-:-:-:-
chr01	9789770	G	A	Macma4_01_g13620:upstream_gene_variant:-:-:-:-:-
chr01	9789819	G	A	Macma4_01_g13620:upstream_gene_variant:-:-:-:-:-
chr01	9789832	T	C	Macma4_01_g13620:upstream_gene_variant:-:-:-:-:-
chr01	9789880	C	T	Macma4_01_g13620:upstream_gene_variant:-:-:-:-:-
chr01	9789935	GAA	G	Macma4_01_g13620:upstream_gene_variant:-:-:-:-:-
chr01	9789978	T	A	Macma4_01_g13620:upstream_gene_variant:-:-:-:-:-
chr01	9789990	C	A	Macma4_01_g13620:upstream_gene_variant:-:-:-:-:-
chr01	9790007	T	C	Macma4_01_g13620:upstream_gene_variant:-:-:-:-:-
chr01	9790019	C	T	Macma4_01_g13620:upstream_gene_variant:-:-:-:-:-
chr01	9790038	T	C	Macma4_01_g13620:upstream_gene_variant:-:-:-:-:-
chr01	9790041	G	A	Macma4_01_g13620:upstream_gene_variant:-:-:-:-:-
chr01	9815487	G	A	Macma4_01_g13630:synonymous_variant:872:762:254:P:ccG/ccA, Macma4_01_g13640:upstream_gene_variant:-:-:-:-:-
chr01	9816035	CCTCAT	C	Macma4_01_g13630:intron_variant:-:-:-:-:-, Macma4_01_g13640:upstream_gene_variant:-:-:-:-:-
chr01	9974546	T	G	Macma4_01_g13870:intron_variant:-:-:-:-:-, Macma4_01_g13880:downstream_gene_variant:-:-:-:-:-
chr01	10354527	A	AAGAAGCAGC	Macma4_01_g14300:downstream_gene_variant:-:-:-:-:-, Macma4_01_g14310:upstream_gene_variant:-:-:-:-:-
chr01	10372802	T	C	Macma4_01_g14340:downstream_gene_variant:-:-:-:-:-
chr01	10725967	A	G	Macma4_01_g14830:downstream_gene_variant:-:-:-:-:-, Macma4_01_g14840:downstream_gene_variant:-:-:-:-:-
chr01	10731905	C	CTAATAATAA	Macma4_01_g14840:upstream_gene_variant:-:-:-:-:-, Macma4_01_g14850:downstream_gene_variant:-:-:-:-:-, Macma4_01_g14860:downstream_gene_variant:-:-:-:-:-
chr01	10922779	TA	T	Macma4_01_g15130:intron_variant:-:-:-:-:-, Macma4_01_g15140:upstream_gene_variant:-:-:-:-:-, Macma4_01_g15150:upstream_gene_variant:-:-:-:-:-
chr01	11149482	T	A	Macma4_01_g15470:upstream_gene_variant:-:-:-:-:-, Macma4_01_g15480:downstream_gene_variant:-:-:-:-:-, Macma4_01_g15490:downstream_gene_variant:-:-:-:-:-
chr01	11239323	G	A	Macma4_01_g15650:downstream_gene_variant:-:-:-:-:-, Macma4_01_g15660:upstream_gene_variant:-:-:-:-:-, Macma4_01_g15670:upstream_gene_variant:-:-:-:-:-, Macma4_01_g15680:intron_variant:-:-:-:-:-, Macma4_01_g15690:upstream_gene_variant:-:-:-:-:-
chr01	11239353	A	G	Macma4_01_g15650:downstream_gene_variant:-:-:-:-:-, Macma4_01_g15660:upstream_gene_variant:-:-:-:-:-, Macma4_01_g15670:upstream_gene_variant:-:-:-:-:-, Macma4_01_g15680:intron_variant:-:-:-:-:-, Macma4_01_g15690:upstream_gene_variant:-:-:-:-:-
chr01	11247006	GAC	G	Macma4_01_g15670:downstream_gene_variant:-:-:-:-:-, Macma4_01_g15690:downstream_gene_variant:-:-:-:-:-, Macma4_01_g15700:upstream_gene_variant:-:-:-:-:-
chr01	11424971	A	AT	Macma4_01_g15970:downstream_gene_variant:-:-:-:-:-
chr01	11459916	T	C	Macma4_01_g15990:upstream_gene_variant:-:-:-:-:-, Macma4_01_g16000:downstream_gene_variant:-:-:-:-:-
chr01	11548917	G	A
chr01	11569104	C	T	Macma4_01_g16110:downstream_gene_variant:-:-:-:-:-, Macma4_01_g16120:upstream_gene_variant:-:-:-:-:-
chr01	11630136	G	A	Macma4_01_g16230:missense_variant:1026:880:294:V/I:Gtt/Att
chr01	11652224	A	T	Macma4_01_g16250:upstream_gene_variant:-:-:-:-:-, Macma4_01_g16260:intron_variant:-:-:-:-:-, Macma4_01_g16270:upstream_gene_variant:-:-:-:-:-
chr01	11684040	C	T	Macma4_01_g16280:intron_variant:-:-:-:-:-, Macma4_01_g16290:upstream_gene_variant:-:-:-:-:-
chr01	11766595	C	T	Macma4_01_g16340:downstream_gene_variant:-:-:-:-:-, Macma4_01_g16350:downstream_gene_variant:-:-:-:-:-, Macma4_01_g16360:upstream_gene_variant:-:-:-:-:-
chr01	11954024	T	TATAA	Macma4_01_g16610:upstream_gene_variant:-:-:-:-:-, Macma4_01_g16620:upstream_gene_variant:-:-:-:-:-
chr01	11954041	TAGAG	T	Macma4_01_g16610:upstream_gene_variant:-:-:-:-:-, Macma4_01_g16620:upstream_gene_variant:-:-:-:-:-
chr01	11986767	G	GA	Macma4_01_g16670:downstream_gene_variant:-:-:-:-:-, Macma4_01_g16680:frameshift_variant:1240-1241:759-760:253-254:-/X:-/T, Macma4_01_g16690:downstream_gene_variant:-:-:-:-:-
chr01	12121543	A	T	Macma4_01_g16890:upstream_gene_variant:-:-:-:-:-, Macma4_01_g16900:intron_variant:-:-:-:-:-
chr01	12143666	G	A	Macma4_01_g16920:intron_variant:-:-:-:-:-
chr01	12183663	G	C	Macma4_01_g16970:downstream_gene_variant:-:-:-:-:-, Macma4_01_g16980:missense_variant:225:225:75:E/D:gaG/gaC, Macma4_01_g16990:downstream_gene_variant:-:-:-:-:-
chr01	12248112	T	A	Macma4_01_g17060:downstream_gene_variant:-:-:-:-:-, Macma4_01_g17070:upstream_gene_variant:-:-:-:-:-
chr01	12375963	G	A	Macma4_01_g17240:downstream_gene_variant:-:-:-:-:-, Macma4_01_g17250:intron_variant:-:-:-:-:-, Macma4_01_g17260:upstream_gene_variant:-:-:-:-:-
chr01	12411964	C	T	Macma4_01_g17290:downstream_gene_variant:-:-:-:-:-, Macma4_01_g17300:downstream_gene_variant:-:-:-:-:-
chr01	12446029	C	T	Macma4_01_g17320:downstream_gene_variant:-:-:-:-:-
chr01	12449118	G	A
chr01	12748720	C	T	Macma4_01_g17670:upstream_gene_variant:-:-:-:-:-, Macma4_01_g17680:intron_variant:-:-:-:-:-
chr01	12826997	C	CT	Macma4_01_g17770:upstream_gene_variant:-:-:-:-:-, Macma4_01_g17780:upstream_gene_variant:-:-:-:-:-, Macma4_01_g17790:upstream_gene_variant:-:-:-:-:-
chr01	13097669	C	T	Macma4_01_g18110:upstream_gene_variant:-:-:-:-:-, Macma4_01_g18130:intron_variant:-:-:-:-:-
chr01	13127228	T	A	Macma4_01_g18170:downstream_gene_variant:-:-:-:-:-
chr01	13347365	C	T	Macma4_01_g18490:downstream_gene_variant:-:-:-:-:-, Macma4_01_g18500:upstream_gene_variant:-:-:-:-:-, Macma4_01_g18510:upstream_gene_variant:-:-:-:-:-, Macma4_01_g18520:upstream_gene_variant:-:-:-:-:-
chr01	13352947	G	A	Macma4_01_g18510:downstream_gene_variant:-:-:-:-:-, Macma4_01_g18520:intron_variant:-:-:-:-:-
chr01	13372363	T	C
chr01	13372374	G	A
chr01	13430354	T	C	Macma4_01_g18570:upstream_gene_variant:-:-:-:-:-
chr01	13481198	C	T	Macma4_01_g18610:downstream_gene_variant:-:-:-:-:-, Macma4_01_g18620:downstream_gene_variant:-:-:-:-:-
chr01	13481429	C	T	Macma4_01_g18610:downstream_gene_variant:-:-:-:-:-, Macma4_01_g18620:downstream_gene_variant:-:-:-:-:-
chr01	13659328	G	A
chr01	13741591	GACACCTCAT	G	Macma4_01_g18830:upstream_gene_variant:-:-:-:-:-, Macma4_01_g18840:upstream_gene_variant:-:-:-:-:-
chr01	13866457	A	AC	Macma4_01_g18970:downstream_gene_variant:-:-:-:-:-
chr01	14092924	T	C	Macma4_01_g19220:downstream_gene_variant:-:-:-:-:-, Macma4_01_g19230:upstream_gene_variant:-:-:-:-:-
chr01	14101143	T	C
chr01	14131022	C	T	Macma4_01_g19250:downstream_gene_variant:-:-:-:-:-, Macma4_01_g19260:upstream_gene_variant:-:-:-:-:-, Macma4_01_g19270:intron_variant:-:-:-:-:-
chr01	14219465	G	A	Macma4_01_g19370:upstream_gene_variant:-:-:-:-:-
chr01	14219475	C	T	Macma4_01_g19370:upstream_gene_variant:-:-:-:-:-
chr01	14236163	C	T	Macma4_01_g19380:missense_variant:1529:1162:388:P/S:Cct/Tct, Macma4_01_g19390:downstream_gene_variant:-:-:-:-:-
chr01	14259321	A	T	Macma4_01_g19390:intron_variant:-:-:-:-:-
chr01	14329096	G	GTA	Macma4_01_g19430:downstream_gene_variant:-:-:-:-:-, Macma4_01_g19440:upstream_gene_variant:-:-:-:-:-
chr01	14355588	C	CG	Macma4_01_g19460:upstream_gene_variant:-:-:-:-:-
chr01	14526417	G	C	Macma4_01_g19620:intron_variant:-:-:-:-:-, Macma4_01_g19630:upstream_gene_variant:-:-:-:-:-
chr01	14595400	C	T	Macma4_01_g19650:intron_variant:-:-:-:-:-
chr01	14627138	T	C	Macma4_01_g19670:upstream_gene_variant:-:-:-:-:-
chr01	14827666	C	T	Macma4_01_g19820:upstream_gene_variant:-:-:-:-:-
chr01	14886948	G	A	Macma4_01_g19870:intron_variant:-:-:-:-:-
chr01	15370284	T	C	Macma4_01_g20190:upstream_gene_variant:-:-:-:-:-, Macma4_01_g20200:synonymous_variant:1107:1107:369:F:ttT/ttC
chr01	15402479	CCGAGGCGCTAGGCGCTCGCCCGAG	C	Macma4_01_g20220:intron_variant:-:-:-:-:-
chr01	15481016	C	T
chr01	15669356	G	A
chr01	15877915	G	A
chr01	15898451	T	TAAAA
chr01	16035788	C	T
chr01	16138520	C	T
chr01	16230185	C	T	Macma4_01_g20700:missense_variant:1623:1493:498:R/Q:cGa/cAa, Macma4_01_g20710:upstream_gene_variant:-:-:-:-:-
chr01	16255319	C	T	Macma4_01_g20720:upstream_gene_variant:-:-:-:-:-
chr01	16261068	A	T	Macma4_01_g20720:intron_variant:-:-:-:-:-
chr01	16276162	A	AT	Macma4_01_g20730:upstream_gene_variant:-:-:-:-:-, Macma4_01_g20760:upstream_gene_variant:-:-:-:-:-
chr01	16318775	C	T
chr01	16508027	G	C	Macma4_01_g20870:downstream_gene_variant:-:-:-:-:-, Macma4_01_g20880:downstream_gene_variant:-:-:-:-:-
chr01	16531609	G	A	Macma4_01_g20890:intron_variant:-:-:-:-:-
chr01	16585347	TG	T	Macma4_01_g20920:upstream_gene_variant:-:-:-:-:-, Macma4_01_g20930:upstream_gene_variant:-:-:-:-:-
chr01	16601260	T	C
chr01	16605269	C	T
chr01	16609904	C	T
chr01	16637226	G	A
chr01	16639253	T	A
chr01	16922894	G	A
chr01	17007373	C	T
chr01	17254166	A	ACACATTCATC
chr01	17386134	G	A
chr01	17413078	C	T
chr01	17740780	G	A	Macma4_01_g21150:downstream_gene_variant:-:-:-:-:-
chr01	17836170	C	A
chr01	17836173	T	C
chr01	18052027	C	T
chr01	18064070	G	A	Macma4_01_g21200:intron_variant:-:-:-:-:-
chr01	18217317	A	C
chr01	18272897	A	C
chr01	18451458	A	G	Macma4_01_g21220:downstream_gene_variant:-:-:-:-:-
chr01	18795412	T	C
chr01	18842761	C	T
chr01	18851473	C	T
chr01	18898082	A	T	Macma4_01_g21400:upstream_gene_variant:-:-:-:-:-, Macma4_01_g21410:downstream_gene_variant:-:-:-:-:-
chr01	18905570	G	A
chr01	19087010	G	A	Macma4_01_g21480:downstream_gene_variant:-:-:-:-:-
chr01	19170966	C	A	Macma4_01_g21530:intron_variant:-:-:-:-:-
chr01	19201866	T	A	Macma4_01_g21550:intron_variant:-:-:-:-:-
chr01	19294749	G	A
chr01	19323754	G	A
chr01	19323777	C	A
chr01	19323779	A	T
chr01	19323948	A	T
chr01	19359882	A	C	Macma4_01_g21620:upstream_gene_variant:-:-:-:-:-
chr01	19359883	T	C	Macma4_01_g21620:upstream_gene_variant:-:-:-:-:-
chr01	19359894	A	G	Macma4_01_g21620:upstream_gene_variant:-:-:-:-:-
chr01	19386369	C	T
chr01	19386379	G	A
chr01	19386386	G	A
chr01	19609128	C	T
chr01	19609157	T	C
chr01	19622122	C	T
chr01	19622132	T	C
chr01	19653063	A	ATTT	Macma4_01_g21770:intron_variant:-:-:-:-:-, Macma4_01_g21780:downstream_gene_variant:-:-:-:-:-
chr01	19737990	C	T	Macma4_01_g21850:upstream_gene_variant:-:-:-:-:-
chr01	20080600	C	A
chr01	20227075	G	A
chr01	20496431	G	A
chr01	20517584	C	T
chr01	20527830	CCTTTTTTTTT	C
chr01	20689939	T	C
chr01	20698006	G	A	Macma4_01_g22340:upstream_gene_variant:-:-:-:-:-
chr01	20820098	T	TC	Macma4_01_g22420:upstream_gene_variant:-:-:-:-:-
chr01	20904088	C	T
chr01	20993872	G	A	Macma4_01_g22570:upstream_gene_variant:-:-:-:-:-, Macma4_01_g22580:upstream_gene_variant:-:-:-:-:-, Macma4_01_g22590:upstream_gene_variant:-:-:-:-:-
chr01	20993882	A	G	Macma4_01_g22570:upstream_gene_variant:-:-:-:-:-, Macma4_01_g22580:upstream_gene_variant:-:-:-:-:-, Macma4_01_g22590:upstream_gene_variant:-:-:-:-:-
chr01	20993916	C	T	Macma4_01_g22570:upstream_gene_variant:-:-:-:-:-, Macma4_01_g22580:upstream_gene_variant:-:-:-:-:-, Macma4_01_g22590:upstream_gene_variant:-:-:-:-:-
chr01	21006849	C	T	Macma4_01_g22600:intron_variant:-:-:-:-:-
chr01	21155986	C	T
chr01	21165915	TACGTC	T
chr01	21165923	T	G
chr01	21181243	T	C
chr01	21212315	C	T
chr01	21287914	A	C
chr01	21364362	C	T
chr01	21410418	T	A	Macma4_01_g22680:intron_variant:-:-:-:-:-
chr01	21449107	T	C
chr01	21545453	A	G
chr01	21613479	C	T
chr01	21641117	A	T
chr01	21641118	A	G
chr01	21826827	C	T
chr01	22012142	G	A
chr01	22013542	C	G
chr01	22013543	T	C
chr01	22013561	T	A
chr01	22016284	C	T
chr01	22079046	G	A
chr01	22241953	C	T
chr01	22286651	G	A
chr01	22320287	C	T
chr01	22320288	G	T
chr01	22386820	G	A
chr01	22415489	C	T	Macma4_01_g22810:downstream_gene_variant:-:-:-:-:-
chr01	22493794	C	T
chr01	22503090	G	T
chr01	22668412	G	A
chr01	22670729	G	A
chr01	22708938	G	A
chr01	23481129	C	A
chr01	23525160	G	A	Macma4_01_g23200:upstream_gene_variant:-:-:-:-:-, Macma4_01_g23210:downstream_gene_variant:-:-:-:-:-, Macma4_01_g23220:downstream_gene_variant:-:-:-:-:-
chr01	23977004	G	A
chr01	23984929	C	T
chr01	24399712	G	A
chr01	24420812	G	A
chr01	24480573	C	T
chr01	24480592	C	T
chr01	24509931	G	A
chr01	24522318	C	T
chr01	24522326	C	T
chr01	24522967	A	G
chr01	24554840	G	GT
chr01	24554843	T	C
chr01	24554846	C	T
chr01	24640935	G	A
chr01	24710154	G	A	Macma4_01_g23310:intron_variant:-:-:-:-:-
chr01	24936976	C	T
chr01	24937050	T	G
chr01	25057498	C	T
chr01	25072007	AC	A
chr01	25120492	T	A
chr01	25122835	T	TG
chr01	25122848	G	A
chr01	25122864	T	C
chr01	25122871	G	A
chr01	25122895	C	G
chr01	25122925	C	T
chr01	25122929	T	C
chr01	25125236	C	T
chr01	25152333	C	T
chr01	25158997	CAGA	C
chr01	25175368	G	A
chr01	25192306	C	T
chr01	25212510	G	A
chr01	25212589	T	G
chr01	25212641	C	T
chr01	25248159	T	C
chr01	25326535	A	C
chr01	25391803	G	A	Macma4_01_g23420:downstream_gene_variant:-:-:-:-:-
chr01	25440073	C	T
chr01	25570656	A	ACC
chr01	25607640	C	T	Macma4_01_g23430:upstream_gene_variant:-:-:-:-:-
chr01	25624891	C	T
chr01	25625014	C	T
chr01	25672020	G	A
chr01	25672057	C	T
chr01	25749930	C	T
chr01	25803912	G	A
chr01	25847477	C	T
chr01	26033503	G	A
chr01	26102705	C	T
chr01	26104938	G	A
chr01	26214191	G	A
chr01	26346341	T	C
chr01	26416786	C	T
chr01	26451381	G	A
chr01	26500540	C	A
chr01	26516630	C	T
chr01	27177531	C	T
chr01	27248668	C	A
chr01	27286591	G	A
chr01	27411792	G	A
chr01	27501880	G	A
chr01	27984006	G	T
chr01	28036810	T	A
chr01	28177584	C	T
chr01	28193676	G	A
chr01	28264454	G	A
chr01	28477569	T	C
chr01	28721028	C	T
chr01	28725615	T	A
chr01	28725683	A	G
chr01	28851531	G	A
chr01	28856301	G	A
chr01	29507891	C	T
chr01	29803674	C	T
chr01	29803677	G	A
chr01	29803708	G	A
chr01	30167864	A	G
chr01	30167887	C	T
chr01	30167900	A	C
chr01	30167992	A	G
chr01	30168042	G	A
chr01	30168059	G	A
chr01	30168089	A	G
chr01	30258856	A	T
chr01	30274686	C	T
chr01	30419423	G	A
chr01	30572483	C	A
chr01	30793898	C	T	Macma4_01_g23650:intron_variant:-:-:-:-:-
chr01	31046270	G	A
chr01	31115918	G	A
chr01	31166192	C	T	Macma4_01_g23750:downstream_gene_variant:-:-:-:-:-
chr01	31237874	C	T
chr01	31426306	G	A
chr01	31490076	C	T
chr01	31949322	C	T
chr01	32044378	G	A
chr01	32205512	C	A
chr01	32209103	G	T
chr01	32262901	AGG	A
chr01	32406036	C	A
chr01	32410044	G	A	Macma4_01_g23910:upstream_gene_variant:-:-:-:-:-
chr01	32442541	GTTAGAGAGGT	G
chr01	32449196	G	T
chr01	32488895	C	T
chr01	32540278	G	A
chr01	32576483	T	C
chr01	32576509	T	C
chr01	32576557	T	C
chr01	32592068	G	A
chr01	32640395	G	A
chr01	32654768	A	G	Macma4_01_g23950:upstream_gene_variant:-:-:-:-:-
chr01	32720291	C	T	Macma4_01_g23970:intron_variant:-:-:-:-:-, Macma4_01_g23980:upstream_gene_variant:-:-:-:-:-
chr01	32720337	T	C	Macma4_01_g23970:intron_variant:-:-:-:-:-, Macma4_01_g23980:upstream_gene_variant:-:-:-:-:-
chr01	32741626	C	T
chr01	32751203	T	A
chr01	32751224	A	G
chr01	32751306	T	C
chr01	32751313	C	A
chr01	32751449	A	G
chr01	32751462	G	A
chr01	32751495	C	T
chr01	32751607	G	A
chr01	32751617	G	T
chr01	32751665	G	A
chr01	32751723	A	C
chr01	32751743	C	T
chr01	32751761	G	A
chr01	32826089	G	A
chr01	32864993	C	T
chr01	33002544	C	T
chr01	33060687	TGA	T
chr01	33091242	C	A
chr01	33091258	C	T
chr01	33166278	C	T
chr01	33222366	T	G
chr01	33404428	C	A
chr01	33438557	C	CTCTTCCATTGAGGCCACTAGCATCCACTAATGA
chr01	33445762	C	A
chr01	33505319	C	T
chr01	33621935	G	A	Macma4_01_g24150:intron_variant:-:-:-:-:-
chr01	33683054	G	A
chr01	33687011	T	A
chr01	33941360	G	A
chr01	33941551	G	GT
chr01	33945925	C	T
chr01	34027890	AGCAT	A	Macma4_01_g24250:upstream_gene_variant:-:-:-:-:-
chr01	34089125	G	A
chr01	34089372	G	A
chr01	34158356	GTCGACCCTAGCAGTGGCACCT	G
chr01	34173788	C	T	Macma4_01_g24310:upstream_gene_variant:-:-:-:-:-
chr01	34219827	T	G
chr01	34467716	C	CA
chr01	34618663	C	T
chr01	34639153	A	G	Macma4_01_g24410:intron_variant:-:-:-:-:-
chr01	34696513	T	C
chr01	34765131	A	AT
chr01	34766779	A	G
chr01	34956954	G	A
chr01	34978989	T	C
chr01	34978994	G	A
chr01	34984727	A	G	Macma4_01_g24540:upstream_gene_variant:-:-:-:-:-
chr01	35211436	C	T	Macma4_01_g24610:downstream_gene_variant:-:-:-:-:-
chr01	35412374	A	ATAAGAAC	Macma4_01_g24660:upstream_gene_variant:-:-:-:-:-, Macma4_01_g24670:downstream_gene_variant:-:-:-:-:-
chr01	35412465	G	A	Macma4_01_g24660:upstream_gene_variant:-:-:-:-:-, Macma4_01_g24670:downstream_gene_variant:-:-:-:-:-
chr01	35454825	A	C
chr01	35454830	T	C
chr01	35454848	T	G
chr01	35851037	C	T
chr01	35934616	C	A	Macma4_01_g24850:downstream_gene_variant:-:-:-:-:-, Macma4_01_g24860:intron_variant:-:-:-:-:-
chr01	35934723	G	A	Macma4_01_g24850:downstream_gene_variant:-:-:-:-:-, Macma4_01_g24860:intron_variant:-:-:-:-:-
chr01	35936283	C	T	Macma4_01_g24860:intron_variant:-:-:-:-:-
chr01	35945905	A	AGAGGAAGAGGAAGCGATGGAGCAG	Macma4_01_g24860:intron_variant:-:-:-:-:-
chr01	35954767	G	A	Macma4_01_g24860:upstream_gene_variant:-:-:-:-:-
chr01	36035598	G	A	Macma4_01_g24880:intron_variant:-:-:-:-:-
chr01	36052382	C	T
chr01	36085264	C	T
chr01	36090344	C	T
chr01	36159952	G	A
chr01	36159960	G	A
chr01	36167566	C	A	Macma4_01_g24900:downstream_gene_variant:-:-:-:-:-
chr01	36362354	G	A
chr01	36362965	T	C
chr01	36362966	G	A
chr01	36363009	C	T
chr01	36366476	T	TTATATATATA
chr01	36390500	T	G
chr01	36457332	C	A
chr01	36477041	G	A
chr01	36478508	C	T
chr01	36478605	GAAGTGATGACT	G
chr01	36599397	C	A
chr01	36602003	G	A
chr01	36619611	G	A	Macma4_01_g24980:intron_variant:-:-:-:-:-
chr01	36675993	G	A	Macma4_01_g24990:upstream_gene_variant:-:-:-:-:-
chr01	37169853	G	A
chr01	37169857	T	A
chr01	37443829	C	A
chr01	37490722	C	G
chr01	37532115	G	A
chr01	37712590	C	T
chr01	37712598	A	G
chr01	37909228	A	C
chr01	37979440	C	T
chr01	38009913	C	A	Macma4_01_g26020:intron_variant:-:-:-:-:-
chr01	38009946	A	G	Macma4_01_g26020:intron_variant:-:-:-:-:-
chr01	38176043	A	C
chr01	38208085	C	T
chr01	38208438	C	A
chr01	38208465	C	T
chr01	38209180	G	A
chr01	38209226	G	C
chr01	38209269	A	G
chr01	38285560	T	G
chr01	38314896	T	G
chr01	38366219	C	CAAT
chr01	38371049	C	T
chr01	38388443	G	A
chr01	38452240	G	A
chr01	38504321	C	A
chr01	38668143	C	T	Macma4_01_g26320:downstream_gene_variant:-:-:-:-:-, Macma4_01_g26330:upstream_gene_variant:-:-:-:-:-
chr01	38668180	G	T	Macma4_01_g26320:downstream_gene_variant:-:-:-:-:-, Macma4_01_g26330:upstream_gene_variant:-:-:-:-:-
chr01	38668385	C	A	Macma4_01_g26320:downstream_gene_variant:-:-:-:-:-, Macma4_01_g26330:upstream_gene_variant:-:-:-:-:-
chr01	38668412	C	T	Macma4_01_g26320:downstream_gene_variant:-:-:-:-:-, Macma4_01_g26330:upstream_gene_variant:-:-:-:-:-
chr01	38668423	G	A	Macma4_01_g26320:downstream_gene_variant:-:-:-:-:-, Macma4_01_g26330:upstream_gene_variant:-:-:-:-:-
chr01	38668466	G	A	Macma4_01_g26320:downstream_gene_variant:-:-:-:-:-, Macma4_01_g26330:upstream_gene_variant:-:-:-:-:-
chr01	38668477	C	T	Macma4_01_g26320:downstream_gene_variant:-:-:-:-:-, Macma4_01_g26330:upstream_gene_variant:-:-:-:-:-
chr01	38668984	G	A	Macma4_01_g26320:downstream_gene_variant:-:-:-:-:-, Macma4_01_g26330:upstream_gene_variant:-:-:-:-:-
chr01	38669044	C	T	Macma4_01_g26320:downstream_gene_variant:-:-:-:-:-, Macma4_01_g26330:upstream_gene_variant:-:-:-:-:-
chr01	38669055	G	A	Macma4_01_g26320:downstream_gene_variant:-:-:-:-:-, Macma4_01_g26330:upstream_gene_variant:-:-:-:-:-
chr01	38669106	G	A	Macma4_01_g26320:downstream_gene_variant:-:-:-:-:-, Macma4_01_g26330:upstream_gene_variant:-:-:-:-:-
chr01	38670326	C	T	Macma4_01_g26330:upstream_gene_variant:-:-:-:-:-
chr01	38670404	C	A	Macma4_01_g26330:upstream_gene_variant:-:-:-:-:-
chr01	38670417	G	T	Macma4_01_g26330:upstream_gene_variant:-:-:-:-:-
chr01	38670446	G	A	Macma4_01_g26330:upstream_gene_variant:-:-:-:-:-
chr01	38670509	G	A	Macma4_01_g26330:upstream_gene_variant:-:-:-:-:-
chr01	38670558	C	T	Macma4_01_g26330:upstream_gene_variant:-:-:-:-:-
chr01	38670585	G	A	Macma4_01_g26330:upstream_gene_variant:-:-:-:-:-
chr01	38670649	C	T	Macma4_01_g26330:upstream_gene_variant:-:-:-:-:-
chr01	38670764	G	T	Macma4_01_g26330:upstream_gene_variant:-:-:-:-:-
chr01	38673062	C	T
chr01	38673112	A	G
chr01	38673254	A	G
chr01	38674060	G	A
chr01	38674082	A	G
chr01	38674337	G	A
chr01	38674775	C	T
chr01	38674909	C	T
chr01	38674995	C	T
chr01	38675272	G	A
chr01	38675314	G	A
chr01	38675333	G	A
chr01	38675414	C	T
chr01	38675454	C	A
chr01	38675489	G	A
chr01	38675553	T	C
chr01	38675560	G	A
chr01	38675604	G	T
chr01	38675610	G	A
chr01	38675805	C	T
chr01	38675829	C	A	Macma4_01_g26340:upstream_gene_variant:-:-:-:-:-
chr01	38676097	G	A	Macma4_01_g26340:upstream_gene_variant:-:-:-:-:-
chr01	38676173	G	A	Macma4_01_g26340:upstream_gene_variant:-:-:-:-:-
chr01	38676316	C	T	Macma4_01_g26340:upstream_gene_variant:-:-:-:-:-
chr01	38677692	C	A	Macma4_01_g26340:upstream_gene_variant:-:-:-:-:-
chr01	38678149	T	C	Macma4_01_g26340:upstream_gene_variant:-:-:-:-:-
chr01	38689679	C	T
chr01	38689684	A	C
chr01	38689686	G	A
chr01	38689694	A	C
chr01	38689698	T	C
chr01	38689734	T	C
chr01	38689749	G	A
chr01	38742202	G	T	Macma4_01_g26380:intron_variant:-:-:-:-:-, Macma4_01_g26390:downstream_gene_variant:-:-:-:-:-
chr01	39133735	G	A
chr01	39157294	C	CATATAT	Macma4_01_g26640:upstream_gene_variant:-:-:-:-:-
chr01	39222081	C	T	Macma4_01_g26650:intron_variant:-:-:-:-:-
chr01	39222085	G	A	Macma4_01_g26650:intron_variant:-:-:-:-:-
chr01	39222087	C	T	Macma4_01_g26650:intron_variant:-:-:-:-:-
chr01	39263145	T	TA	Macma4_01_g26660:upstream_gene_variant:-:-:-:-:-
chr01	39310423	C	T	Macma4_01_g26680:downstream_gene_variant:-:-:-:-:-
chr01	39385059	C	T	Macma4_01_g26690:downstream_gene_variant:-:-:-:-:-
chr01	39399511	C	T	Macma4_01_g26700:downstream_gene_variant:-:-:-:-:-, Macma4_01_g26710:downstream_gene_variant:-:-:-:-:-, Macma4_01_g26720:intron_variant:-:-:-:-:-
chr01	39441377	C	CGTTACGAGGGAATCGATCTG	Macma4_01_g26730:upstream_gene_variant:-:-:-:-:-, Macma4_01_g26740:downstream_gene_variant:-:-:-:-:-
chr01	39453649	G	A
chr01	39565414	G	A
chr01	39761028	G	A
chr01	39761236	C	T
chr01	39761243	A	C
chr01	39761366	C	T
chr01	39761383	G	A
chr01	39906674	C	T	Macma4_01_g26910:upstream_gene_variant:-:-:-:-:-
chr01	39922783	C	T	Macma4_01_g26920:downstream_gene_variant:-:-:-:-:-
chr01	40188670	A	T
chr01	40466578	A	G	Macma4_01_g27070:intron_variant:-:-:-:-:-
chr01	40880760	G	A
chr01	41067108	T	A	Macma4_01_g27240:downstream_gene_variant:-:-:-:-:-, Macma4_01_g27250:missense_variant:768:768:256:S/R:agT/agA
chr01	41248233	C	T
chr01	41470328	A	C	Macma4_01_g27420:intron_variant:-:-:-:-:-
chr01	41470951	G	A	Macma4_01_g27420:intron_variant:-:-:-:-:-
chr01	41471000	A	G	Macma4_01_g27420:intron_variant:-:-:-:-:-
chr01	41471023	T	C	Macma4_01_g27420:intron_variant:-:-:-:-:-
chr01	41471080	G	A	Macma4_01_g27420:intron_variant:-:-:-:-:-
chr01	41471086	G	A	Macma4_01_g27420:intron_variant:-:-:-:-:-
chr01	41471101	C	T	Macma4_01_g27420:intron_variant:-:-:-:-:-
chr01	41523129	C	A
chr01	41526185	G	A
chr01	41538776	G	A
chr01	41538786	G	C
chr01	41538796	A	G
chr01	41545790	G	A
chr01	41639366	C	T
chr01	41648930	C	T
chr01	41648965	G	A
chr01	41717683	C	T
chr02	17687	C	A
chr02	17851	G	T
chr02	17859	T	C
chr02	17871	T	G
chr02	18095	C	T
chr02	18159	C	T
chr02	18243	C	T
chr02	18337	G	C
chr02	18375	C	T
chr02	18416	C	A
chr02	18583	C	T
chr02	18591	C	T
chr02	18863	G	A
chr02	18991	C	T
chr02	19344	G	A
chr02	19368	G	T
chr02	19406	C	A
chr02	19426	G	T
chr02	26888	C	T
chr02	27810	G	A
chr02	27853	AG	A
chr02	27877	C	A
chr02	28281	A	T
chr02	28284	G	C
chr02	28440	G	A
chr02	28442	G	A
chr02	28546	G	T
chr02	28602	G	A
chr02	28608	G	A
chr02	28642	G	A
chr02	28683	C	T
chr02	28735	G	A
chr02	28822	G	A
chr02	28837	G	A
chr02	28889	G	A
chr02	28985	G	A
chr02	28999	C	T
chr02	29000	G	A
chr02	29093	G	A
chr02	29137	G	A
chr02	29183	TC	T
chr02	29263	C	T
chr02	29380	C	T
chr02	29397	G	A
chr02	29686	C	T
chr02	29737	G	T
chr02	29744	C	T
chr02	29784	G	A
chr02	29803	T	A
chr02	29825	G	A
chr02	29845	C	T
chr02	29859	G	A
chr02	29880	G	A
chr02	29901	G	A
chr02	29924	G	A
chr02	29943	C	T
chr02	29995	C	T
chr02	30024	G	A
chr02	30076	C	T
chr02	30184	G	A
chr02	30250	C	T
chr02	30544	C	T
chr02	30545	G	A
chr02	30554	C	T
chr02	30560	C	T
chr02	30590	C	A
chr02	30590	C	T
chr02	30798	C	T
chr02	31166	C	T
chr02	31195	C	T
chr02	31927	G	A
chr02	32037	T	A
chr02	38932	G	A	Macma4_02_g00010:upstream_gene_variant:-:-:-:-:-
chr02	38967	G	A	Macma4_02_g00010:upstream_gene_variant:-:-:-:-:-
chr02	38991	A	G	Macma4_02_g00010:upstream_gene_variant:-:-:-:-:-
chr02	39000	G	A	Macma4_02_g00010:upstream_gene_variant:-:-:-:-:-
chr02	39026	T	C	Macma4_02_g00010:upstream_gene_variant:-:-:-:-:-
chr02	39411	C	T	Macma4_02_g00010:upstream_gene_variant:-:-:-:-:-
chr02	39540	G	T	Macma4_02_g00010:upstream_gene_variant:-:-:-:-:-
chr02	39819	G	A	Macma4_02_g00010:upstream_gene_variant:-:-:-:-:-
chr02	40200	G	A	Macma4_02_g00010:upstream_gene_variant:-:-:-:-:-
chr02	40212	AC	A	Macma4_02_g00010:upstream_gene_variant:-:-:-:-:-
chr02	40470	G	A	Macma4_02_g00010:upstream_gene_variant:-:-:-:-:-
chr02	40493	C	T	Macma4_02_g00010:upstream_gene_variant:-:-:-:-:-
chr02	40598	C	T	Macma4_02_g00010:upstream_gene_variant:-:-:-:-:-
chr02	40603	G	A	Macma4_02_g00010:upstream_gene_variant:-:-:-:-:-
chr02	40624	G	A	Macma4_02_g00010:upstream_gene_variant:-:-:-:-:-
chr02	40702	G	A	Macma4_02_g00010:upstream_gene_variant:-:-:-:-:-
chr02	40743	C	T	Macma4_02_g00010:upstream_gene_variant:-:-:-:-:-
chr02	41274	C	T	Macma4_02_g00010:upstream_gene_variant:-:-:-:-:-
chr02	41378	G	A	Macma4_02_g00010:upstream_gene_variant:-:-:-:-:-
chr02	41496	G	A	Macma4_02_g00010:upstream_gene_variant:-:-:-:-:-
chr02	41575	C	T	Macma4_02_g00010:upstream_gene_variant:-:-:-:-:-
chr02	41855	G	C	Macma4_02_g00010:upstream_gene_variant:-:-:-:-:-
chr02	42029	G	A	Macma4_02_g00010:upstream_gene_variant:-:-:-:-:-
chr02	42198	C	T	Macma4_02_g00010:upstream_gene_variant:-:-:-:-:-
chr02	42209	C	T	Macma4_02_g00010:upstream_gene_variant:-:-:-:-:-
chr02	42296	G	A	Macma4_02_g00010:upstream_gene_variant:-:-:-:-:-
chr02	42310	C	T	Macma4_02_g00010:upstream_gene_variant:-:-:-:-:-
chr02	42415	G	A	Macma4_02_g00010:upstream_gene_variant:-:-:-:-:-
chr02	42445	G	A	Macma4_02_g00010:upstream_gene_variant:-:-:-:-:-
chr02	42515	G	A	Macma4_02_g00010:missense_variant:62:62:21:G/D:gGc/gAc
chr02	42539	G	A	Macma4_02_g00010:missense_variant:86:86:29:C/Y:tGt/tAt
chr02	42889	C	T	Macma4_02_g00010:missense_variant:436:436:146:R/C:Cgc/Tgc
chr02	43080	C	T	Macma4_02_g00010:downstream_gene_variant:-:-:-:-:-
chr02	43155	G	A	Macma4_02_g00010:downstream_gene_variant:-:-:-:-:-
chr02	43334	C	T	Macma4_02_g00010:downstream_gene_variant:-:-:-:-:-
chr02	43389	A	C	Macma4_02_g00010:downstream_gene_variant:-:-:-:-:-
chr02	43460	C	A	Macma4_02_g00010:downstream_gene_variant:-:-:-:-:-
chr02	43526	G	A	Macma4_02_g00010:downstream_gene_variant:-:-:-:-:-
chr02	43580	C	T	Macma4_02_g00010:downstream_gene_variant:-:-:-:-:-
chr02	43828	G	A	Macma4_02_g00010:downstream_gene_variant:-:-:-:-:-
chr02	43941	C	T	Macma4_02_g00010:downstream_gene_variant:-:-:-:-:-
chr02	44089	G	A	Macma4_02_g00010:downstream_gene_variant:-:-:-:-:-
chr02	44326	A	G	Macma4_02_g00010:downstream_gene_variant:-:-:-:-:-
chr02	44387	C	T	Macma4_02_g00010:downstream_gene_variant:-:-:-:-:-
chr02	44628	C	T	Macma4_02_g00010:downstream_gene_variant:-:-:-:-:-
chr02	44690	G	A	Macma4_02_g00010:downstream_gene_variant:-:-:-:-:-
chr02	44849	G	A	Macma4_02_g00010:downstream_gene_variant:-:-:-:-:-
chr02	44911	C	T	Macma4_02_g00010:downstream_gene_variant:-:-:-:-:-
chr02	44941	G	A	Macma4_02_g00010:downstream_gene_variant:-:-:-:-:-
chr02	44961	G	T	Macma4_02_g00010:downstream_gene_variant:-:-:-:-:-
chr02	45025	G	A	Macma4_02_g00010:downstream_gene_variant:-:-:-:-:-
chr02	45108	G	A	Macma4_02_g00010:downstream_gene_variant:-:-:-:-:-
chr02	45234	C	T	Macma4_02_g00010:downstream_gene_variant:-:-:-:-:-
chr02	45601	C	T	Macma4_02_g00010:downstream_gene_variant:-:-:-:-:-
chr02	45705	G	A	Macma4_02_g00010:downstream_gene_variant:-:-:-:-:-
chr02	45934	G	A	Macma4_02_g00010:downstream_gene_variant:-:-:-:-:-
chr02	45940	C	T	Macma4_02_g00010:downstream_gene_variant:-:-:-:-:-
chr02	46073	G	A	Macma4_02_g00010:downstream_gene_variant:-:-:-:-:-
chr02	46410	G	A	Macma4_02_g00010:downstream_gene_variant:-:-:-:-:-
chr02	46561	C	T	Macma4_02_g00010:downstream_gene_variant:-:-:-:-:-
chr02	46584	C	T	Macma4_02_g00010:downstream_gene_variant:-:-:-:-:-
chr02	47096	C	T	Macma4_02_g00010:downstream_gene_variant:-:-:-:-:-
chr02	47097	C	T	Macma4_02_g00010:downstream_gene_variant:-:-:-:-:-
chr02	47164	C	G	Macma4_02_g00010:downstream_gene_variant:-:-:-:-:-
chr02	47216	C	T	Macma4_02_g00010:downstream_gene_variant:-:-:-:-:-
chr02	47280	C	T	Macma4_02_g00010:downstream_gene_variant:-:-:-:-:-
chr02	47311	T	A	Macma4_02_g00010:downstream_gene_variant:-:-:-:-:-
chr02	47659	C	T	Macma4_02_g00010:downstream_gene_variant:-:-:-:-:-
chr02	47710	C	T	Macma4_02_g00010:downstream_gene_variant:-:-:-:-:-
chr02	47754	G	A	Macma4_02_g00010:downstream_gene_variant:-:-:-:-:-
chr02	47821	C	A	Macma4_02_g00010:downstream_gene_variant:-:-:-:-:-
chr02	47976	G	A	Macma4_02_g00010:downstream_gene_variant:-:-:-:-:-
chr02	48096	G	A
chr02	48118	T	C
chr02	48234	C	T
chr02	48426	C	T
chr02	48444	G	T
chr02	48693	G	A
chr02	48846	C	T
chr02	48924	G	A
chr02	49000	G	A
chr02	49308	C	T
chr02	49343	G	T
chr02	49549	C	T
chr02	49850	A	G
chr02	50083	G	A
chr02	50133	G	A
chr02	50723	C	T
chr02	50764	G	A
chr02	51063	G	A
chr02	51119	C	T
chr02	51516	G	T
chr02	51742	G	A
chr02	51746	C	T
chr02	51747	G	A
chr02	52029	C	G
chr02	52031	G	A
chr02	52069	C	T
chr02	52323	C	T
chr02	52367	G	A
chr02	52381	C	T
chr02	52538	T	G
chr02	52660	T	A
chr02	53129	C	T
chr02	53153	C	T
chr02	53312	G	A
chr02	59842	C	T
chr02	60049	C	T
chr02	60675	CAGTA	C
chr02	61122	G	A
chr02	61301	T	C
chr02	61456	T	C
chr02	61457	C	T
chr02	61468	G	A
chr02	61852	G	A
chr02	61909	C	T
chr02	61916	G	A
chr02	62022	G	A
chr02	62098	C	T
chr02	62209	C	T
chr02	62357	G	A
chr02	62385	C	T
chr02	62425	A	G
chr02	62502	G	T
chr02	62566	C	T	Macma4_02_g00020:downstream_gene_variant:-:-:-:-:-
chr02	62683	G	A	Macma4_02_g00020:downstream_gene_variant:-:-:-:-:-
chr02	62893	G	T	Macma4_02_g00020:downstream_gene_variant:-:-:-:-:-
chr02	63020	G	T	Macma4_02_g00020:downstream_gene_variant:-:-:-:-:-
chr02	63258	G	A	Macma4_02_g00020:downstream_gene_variant:-:-:-:-:-
chr02	63566	AG	A	Macma4_02_g00020:downstream_gene_variant:-:-:-:-:-
chr02	63919	T	A	Macma4_02_g00020:downstream_gene_variant:-:-:-:-:-
chr02	63978	C	CA	Macma4_02_g00020:downstream_gene_variant:-:-:-:-:-
chr02	64142	G	A	Macma4_02_g00020:downstream_gene_variant:-:-:-:-:-
chr02	64536	G	A	Macma4_02_g00020:downstream_gene_variant:-:-:-:-:-
chr02	64615	T	A	Macma4_02_g00020:downstream_gene_variant:-:-:-:-:-
chr02	64889	G	A	Macma4_02_g00020:downstream_gene_variant:-:-:-:-:-
chr02	65335	C	T	Macma4_02_g00020:downstream_gene_variant:-:-:-:-:-
chr02	65369	T	G	Macma4_02_g00020:downstream_gene_variant:-:-:-:-:-
chr02	65654	G	A	Macma4_02_g00020:downstream_gene_variant:-:-:-:-:-
chr02	65695	G	A	Macma4_02_g00020:downstream_gene_variant:-:-:-:-:-
chr02	65700	C	T	Macma4_02_g00020:downstream_gene_variant:-:-:-:-:-
chr02	65707	T	C	Macma4_02_g00020:downstream_gene_variant:-:-:-:-:-
chr02	65792	G	C	Macma4_02_g00020:downstream_gene_variant:-:-:-:-:-
chr02	65830	ATC	A	Macma4_02_g00020:downstream_gene_variant:-:-:-:-:-
chr02	65852	C	T	Macma4_02_g00020:downstream_gene_variant:-:-:-:-:-
chr02	65972	C	T	Macma4_02_g00020:downstream_gene_variant:-:-:-:-:-
chr02	66326	C	T	Macma4_02_g00020:downstream_gene_variant:-:-:-:-:-
chr02	66526	G	A	Macma4_02_g00020:downstream_gene_variant:-:-:-:-:-
chr02	66625	G	A	Macma4_02_g00020:downstream_gene_variant:-:-:-:-:-
chr02	66849	G	A	Macma4_02_g00020:downstream_gene_variant:-:-:-:-:-
chr02	67712	G	T	Macma4_02_g00020:3_prime_UTR_variant:326:-:-:-:-
chr02	67713	G	T	Macma4_02_g00020:3_prime_UTR_variant:325:-:-:-:-
chr02	68037	A	C	Macma4_02_g00020:intron_variant:-:-:-:-:-
chr02	69354	T	G	Macma4_02_g00020:upstream_gene_variant:-:-:-:-:-
chr02	69655	A	T	Macma4_02_g00020:upstream_gene_variant:-:-:-:-:-
chr02	70284	T	TG	Macma4_02_g00020:upstream_gene_variant:-:-:-:-:-
chr02	70432	A	G	Macma4_02_g00020:upstream_gene_variant:-:-:-:-:-
chr02	70554	G	T	Macma4_02_g00020:upstream_gene_variant:-:-:-:-:-
chr02	70595	T	C	Macma4_02_g00020:upstream_gene_variant:-:-:-:-:-
chr02	70648	C	T	Macma4_02_g00020:upstream_gene_variant:-:-:-:-:-
chr02	70758	A	G	Macma4_02_g00020:upstream_gene_variant:-:-:-:-:-
chr02	71103	G	A	Macma4_02_g00020:upstream_gene_variant:-:-:-:-:-
chr02	71298	C	T	Macma4_02_g00020:upstream_gene_variant:-:-:-:-:-
chr02	71489	G	A	Macma4_02_g00020:upstream_gene_variant:-:-:-:-:-
chr02	71857	T	C	Macma4_02_g00020:upstream_gene_variant:-:-:-:-:-
chr02	72307	G	A	Macma4_02_g00020:upstream_gene_variant:-:-:-:-:-, Macma4_02_g00030:upstream_gene_variant:-:-:-:-:-
chr02	72361	C	A	Macma4_02_g00020:upstream_gene_variant:-:-:-:-:-, Macma4_02_g00030:upstream_gene_variant:-:-:-:-:-
chr02	72517	C	T	Macma4_02_g00020:upstream_gene_variant:-:-:-:-:-, Macma4_02_g00030:upstream_gene_variant:-:-:-:-:-
chr02	72568	G	A	Macma4_02_g00020:upstream_gene_variant:-:-:-:-:-, Macma4_02_g00030:upstream_gene_variant:-:-:-:-:-
chr02	72598	C	A	Macma4_02_g00020:upstream_gene_variant:-:-:-:-:-, Macma4_02_g00030:upstream_gene_variant:-:-:-:-:-
chr02	72741	G	A	Macma4_02_g00020:upstream_gene_variant:-:-:-:-:-, Macma4_02_g00030:upstream_gene_variant:-:-:-:-:-
chr02	72826	C	T	Macma4_02_g00020:upstream_gene_variant:-:-:-:-:-, Macma4_02_g00030:upstream_gene_variant:-:-:-:-:-
chr02	72933	G	A	Macma4_02_g00020:upstream_gene_variant:-:-:-:-:-, Macma4_02_g00030:upstream_gene_variant:-:-:-:-:-, Macma4_02_g00040:upstream_gene_variant:-:-:-:-:-
chr02	72984	C	A	Macma4_02_g00020:upstream_gene_variant:-:-:-:-:-, Macma4_02_g00030:upstream_gene_variant:-:-:-:-:-, Macma4_02_g00040:upstream_gene_variant:-:-:-:-:-
chr02	73016	G	T	Macma4_02_g00020:upstream_gene_variant:-:-:-:-:-, Macma4_02_g00030:upstream_gene_variant:-:-:-:-:-, Macma4_02_g00040:upstream_gene_variant:-:-:-:-:-
chr02	73057	T	C	Macma4_02_g00020:upstream_gene_variant:-:-:-:-:-, Macma4_02_g00030:upstream_gene_variant:-:-:-:-:-, Macma4_02_g00040:upstream_gene_variant:-:-:-:-:-
chr02	73188	G	A	Macma4_02_g00020:upstream_gene_variant:-:-:-:-:-, Macma4_02_g00030:upstream_gene_variant:-:-:-:-:-, Macma4_02_g00040:upstream_gene_variant:-:-:-:-:-
chr02	73189	G	A	Macma4_02_g00020:upstream_gene_variant:-:-:-:-:-, Macma4_02_g00030:upstream_gene_variant:-:-:-:-:-, Macma4_02_g00040:upstream_gene_variant:-:-:-:-:-
chr02	73556	T	G	Macma4_02_g00030:upstream_gene_variant:-:-:-:-:-, Macma4_02_g00040:upstream_gene_variant:-:-:-:-:-
chr02	73632	C	T	Macma4_02_g00030:upstream_gene_variant:-:-:-:-:-, Macma4_02_g00040:upstream_gene_variant:-:-:-:-:-
chr02	73935	T	A	Macma4_02_g00030:upstream_gene_variant:-:-:-:-:-, Macma4_02_g00040:upstream_gene_variant:-:-:-:-:-
chr02	74123	G	A	Macma4_02_g00030:upstream_gene_variant:-:-:-:-:-, Macma4_02_g00040:upstream_gene_variant:-:-:-:-:-
chr02	74285	A	C	Macma4_02_g00030:upstream_gene_variant:-:-:-:-:-, Macma4_02_g00040:upstream_gene_variant:-:-:-:-:-
chr02	74869	G	A	Macma4_02_g00030:upstream_gene_variant:-:-:-:-:-, Macma4_02_g00040:upstream_gene_variant:-:-:-:-:-
chr02	75084	C	A	Macma4_02_g00030:upstream_gene_variant:-:-:-:-:-, Macma4_02_g00040:upstream_gene_variant:-:-:-:-:-
chr02	75097	C	T	Macma4_02_g00030:upstream_gene_variant:-:-:-:-:-, Macma4_02_g00040:upstream_gene_variant:-:-:-:-:-
chr02	75139	T	A	Macma4_02_g00030:upstream_gene_variant:-:-:-:-:-, Macma4_02_g00040:upstream_gene_variant:-:-:-:-:-
chr02	75330	G	A	Macma4_02_g00030:upstream_gene_variant:-:-:-:-:-, Macma4_02_g00040:upstream_gene_variant:-:-:-:-:-
chr02	75413	C	T	Macma4_02_g00030:upstream_gene_variant:-:-:-:-:-, Macma4_02_g00040:upstream_gene_variant:-:-:-:-:-
chr02	75459	C	G	Macma4_02_g00030:upstream_gene_variant:-:-:-:-:-, Macma4_02_g00040:upstream_gene_variant:-:-:-:-:-
chr02	75681	G	A	Macma4_02_g00030:upstream_gene_variant:-:-:-:-:-, Macma4_02_g00040:upstream_gene_variant:-:-:-:-:-
chr02	75719	C	T	Macma4_02_g00030:upstream_gene_variant:-:-:-:-:-, Macma4_02_g00040:upstream_gene_variant:-:-:-:-:-
chr02	76058	C	T	Macma4_02_g00030:upstream_gene_variant:-:-:-:-:-, Macma4_02_g00040:upstream_gene_variant:-:-:-:-:-
chr02	76219	G	T	Macma4_02_g00030:upstream_gene_variant:-:-:-:-:-, Macma4_02_g00040:upstream_gene_variant:-:-:-:-:-
chr02	76225	C	A	Macma4_02_g00030:upstream_gene_variant:-:-:-:-:-, Macma4_02_g00040:upstream_gene_variant:-:-:-:-:-
chr02	76318	T	A	Macma4_02_g00030:upstream_gene_variant:-:-:-:-:-, Macma4_02_g00040:upstream_gene_variant:-:-:-:-:-
chr02	76371	C	T	Macma4_02_g00030:upstream_gene_variant:-:-:-:-:-, Macma4_02_g00040:upstream_gene_variant:-:-:-:-:-
chr02	76628	C	T	Macma4_02_g00030:upstream_gene_variant:-:-:-:-:-, Macma4_02_g00040:upstream_gene_variant:-:-:-:-:-
chr02	76700	C	T	Macma4_02_g00030:upstream_gene_variant:-:-:-:-:-, Macma4_02_g00040:upstream_gene_variant:-:-:-:-:-
chr02	76751	T	C	Macma4_02_g00030:upstream_gene_variant:-:-:-:-:-, Macma4_02_g00040:upstream_gene_variant:-:-:-:-:-
chr02	76765	C	A	Macma4_02_g00030:upstream_gene_variant:-:-:-:-:-, Macma4_02_g00040:upstream_gene_variant:-:-:-:-:-
chr02	76771	C	A	Macma4_02_g00030:upstream_gene_variant:-:-:-:-:-, Macma4_02_g00040:upstream_gene_variant:-:-:-:-:-
chr02	76772	C	A	Macma4_02_g00030:upstream_gene_variant:-:-:-:-:-, Macma4_02_g00040:upstream_gene_variant:-:-:-:-:-
chr02	76776	T	C	Macma4_02_g00030:upstream_gene_variant:-:-:-:-:-, Macma4_02_g00040:upstream_gene_variant:-:-:-:-:-
chr02	77265	T	C	Macma4_02_g00030:intron_variant:-:-:-:-:-, Macma4_02_g00040:upstream_gene_variant:-:-:-:-:-
chr02	80172	C	T	Macma4_02_g00030:downstream_gene_variant:-:-:-:-:-, Macma4_02_g00040:downstream_gene_variant:-:-:-:-:-
chr02	80254	T	C	Macma4_02_g00030:downstream_gene_variant:-:-:-:-:-, Macma4_02_g00040:downstream_gene_variant:-:-:-:-:-
chr02	80258	A	T	Macma4_02_g00030:downstream_gene_variant:-:-:-:-:-, Macma4_02_g00040:downstream_gene_variant:-:-:-:-:-
chr02	80277	C	CTGCTCAG	Macma4_02_g00030:downstream_gene_variant:-:-:-:-:-, Macma4_02_g00040:downstream_gene_variant:-:-:-:-:-
chr02	80629	G	T	Macma4_02_g00030:downstream_gene_variant:-:-:-:-:-, Macma4_02_g00040:downstream_gene_variant:-:-:-:-:-
chr02	80873	T	C	Macma4_02_g00030:downstream_gene_variant:-:-:-:-:-, Macma4_02_g00040:downstream_gene_variant:-:-:-:-:-, Macma4_02_g00050:upstream_gene_variant:-:-:-:-:-
chr02	80875	C	A	Macma4_02_g00030:downstream_gene_variant:-:-:-:-:-, Macma4_02_g00040:downstream_gene_variant:-:-:-:-:-, Macma4_02_g00050:upstream_gene_variant:-:-:-:-:-
chr02	81108	C	T	Macma4_02_g00030:downstream_gene_variant:-:-:-:-:-, Macma4_02_g00040:downstream_gene_variant:-:-:-:-:-, Macma4_02_g00050:upstream_gene_variant:-:-:-:-:-
chr02	81145	A	G	Macma4_02_g00030:downstream_gene_variant:-:-:-:-:-, Macma4_02_g00040:downstream_gene_variant:-:-:-:-:-, Macma4_02_g00050:upstream_gene_variant:-:-:-:-:-
chr02	81214	C	A	Macma4_02_g00030:downstream_gene_variant:-:-:-:-:-, Macma4_02_g00040:downstream_gene_variant:-:-:-:-:-, Macma4_02_g00050:upstream_gene_variant:-:-:-:-:-
chr02	82420	C	T	Macma4_02_g00030:downstream_gene_variant:-:-:-:-:-, Macma4_02_g00040:downstream_gene_variant:-:-:-:-:-, Macma4_02_g00050:upstream_gene_variant:-:-:-:-:-, Macma4_02_g00060:upstream_gene_variant:-:-:-:-:-
chr02	83494	G	A	Macma4_02_g00050:upstream_gene_variant:-:-:-:-:-, Macma4_02_g00060:upstream_gene_variant:-:-:-:-:-
chr02	83666	A	T	Macma4_02_g00050:upstream_gene_variant:-:-:-:-:-, Macma4_02_g00060:upstream_gene_variant:-:-:-:-:-
chr02	85456	TA	T	Macma4_02_g00050:upstream_gene_variant:-:-:-:-:-, Macma4_02_g00060:upstream_gene_variant:-:-:-:-:-
chr02	85486	T	TTC	Macma4_02_g00050:upstream_gene_variant:-:-:-:-:-, Macma4_02_g00060:upstream_gene_variant:-:-:-:-:-
chr02	85672	G	T	Macma4_02_g00050:upstream_gene_variant:-:-:-:-:-, Macma4_02_g00060:upstream_gene_variant:-:-:-:-:-
chr02	106115	C	T
chr02	208801	C	T	Macma4_02_g00130:upstream_gene_variant:-:-:-:-:-
chr02	208812	A	G	Macma4_02_g00130:upstream_gene_variant:-:-:-:-:-
chr02	208820	A	G	Macma4_02_g00130:upstream_gene_variant:-:-:-:-:-
chr02	208941	C	T	Macma4_02_g00130:upstream_gene_variant:-:-:-:-:-
chr02	208954	G	A	Macma4_02_g00130:upstream_gene_variant:-:-:-:-:-
chr02	209028	G	A	Macma4_02_g00130:upstream_gene_variant:-:-:-:-:-
chr02	209031	G	A	Macma4_02_g00130:upstream_gene_variant:-:-:-:-:-
chr02	209219	T	C	Macma4_02_g00130:upstream_gene_variant:-:-:-:-:-
chr02	209253	G	A	Macma4_02_g00130:upstream_gene_variant:-:-:-:-:-
chr02	209440	C	A	Macma4_02_g00130:upstream_gene_variant:-:-:-:-:-
chr02	209445	T	A	Macma4_02_g00130:upstream_gene_variant:-:-:-:-:-
chr02	209484	C	A	Macma4_02_g00130:upstream_gene_variant:-:-:-:-:-
chr02	209488	A	G	Macma4_02_g00130:upstream_gene_variant:-:-:-:-:-
chr02	209552	C	T	Macma4_02_g00130:upstream_gene_variant:-:-:-:-:-
chr02	209570	T	TC	Macma4_02_g00130:upstream_gene_variant:-:-:-:-:-
chr02	209727	G	A	Macma4_02_g00130:upstream_gene_variant:-:-:-:-:-
chr02	209793	A	G	Macma4_02_g00130:upstream_gene_variant:-:-:-:-:-
chr02	209887	C	T	Macma4_02_g00130:upstream_gene_variant:-:-:-:-:-
chr02	209893	G	A	Macma4_02_g00130:upstream_gene_variant:-:-:-:-:-
chr02	209927	A	G	Macma4_02_g00130:upstream_gene_variant:-:-:-:-:-
chr02	210145	A	C	Macma4_02_g00130:upstream_gene_variant:-:-:-:-:-
chr02	210400	T	C	Macma4_02_g00130:intron_variant:-:-:-:-:-
chr02	210412	T	C	Macma4_02_g00130:intron_variant:-:-:-:-:-
chr02	210567	A	C	Macma4_02_g00130:intron_variant:-:-:-:-:-
chr02	210786	T	C	Macma4_02_g00130:synonymous_variant:270:192:64:D:gaT/gaC
chr02	210886	G	T	Macma4_02_g00130:3_prime_UTR_variant:370:-:-:-:-
chr02	211354	G	A	Macma4_02_g00130:downstream_gene_variant:-:-:-:-:-
chr02	211642	C	G	Macma4_02_g00130:downstream_gene_variant:-:-:-:-:-
chr02	221251	G	A	Macma4_02_g00140:upstream_gene_variant:-:-:-:-:-
chr02	221272	AG	A	Macma4_02_g00140:upstream_gene_variant:-:-:-:-:-
chr02	221341	A	T	Macma4_02_g00140:upstream_gene_variant:-:-:-:-:-
chr02	221399	T	C	Macma4_02_g00140:upstream_gene_variant:-:-:-:-:-
chr02	221435	C	A	Macma4_02_g00140:upstream_gene_variant:-:-:-:-:-
chr02	221562	G	C	Macma4_02_g00140:upstream_gene_variant:-:-:-:-:-
chr02	221572	T	A	Macma4_02_g00140:upstream_gene_variant:-:-:-:-:-
chr02	221573	C	T	Macma4_02_g00140:upstream_gene_variant:-:-:-:-:-
chr02	221673	A	T	Macma4_02_g00140:upstream_gene_variant:-:-:-:-:-
chr02	221824	C	T	Macma4_02_g00140:upstream_gene_variant:-:-:-:-:-
chr02	222234	T	C	Macma4_02_g00140:upstream_gene_variant:-:-:-:-:-
chr02	222451	G	C	Macma4_02_g00140:upstream_gene_variant:-:-:-:-:-
chr02	222459	G	A	Macma4_02_g00140:upstream_gene_variant:-:-:-:-:-
chr02	222509	C	T	Macma4_02_g00140:upstream_gene_variant:-:-:-:-:-
chr02	222511	G	T	Macma4_02_g00140:upstream_gene_variant:-:-:-:-:-
chr02	222553	C	T	Macma4_02_g00140:upstream_gene_variant:-:-:-:-:-
chr02	222608	T	TC	Macma4_02_g00140:upstream_gene_variant:-:-:-:-:-
chr02	222646	C	A	Macma4_02_g00140:upstream_gene_variant:-:-:-:-:-
chr02	222660	G	A	Macma4_02_g00140:upstream_gene_variant:-:-:-:-:-
chr02	222953	A	AT	Macma4_02_g00140:upstream_gene_variant:-:-:-:-:-
chr02	222979	T	A	Macma4_02_g00140:upstream_gene_variant:-:-:-:-:-
chr02	223104	T	C	Macma4_02_g00140:upstream_gene_variant:-:-:-:-:-
chr02	223503	C	T	Macma4_02_g00140:upstream_gene_variant:-:-:-:-:-
chr02	223826	T	C	Macma4_02_g00140:intron_variant:-:-:-:-:-
chr02	223845	C	G	Macma4_02_g00140:intron_variant:-:-:-:-:-
chr02	223973	C	G	Macma4_02_g00140:splice_polypyrimidine_tract_variant,intron_variant:-:-:-:-:-
chr02	224016	C	T	Macma4_02_g00140:synonymous_variant:262:150:50:D:gaC/gaT
chr02	224525	A	G	Macma4_02_g00140:intron_variant:-:-:-:-:-
chr02	224578	A	T	Macma4_02_g00140:intron_variant:-:-:-:-:-
chr02	224582	A	G	Macma4_02_g00140:intron_variant:-:-:-:-:-
chr02	224664	A	G	Macma4_02_g00140:intron_variant:-:-:-:-:-
chr02	224696	C	A	Macma4_02_g00140:intron_variant:-:-:-:-:-
chr02	224710	G	T	Macma4_02_g00140:intron_variant:-:-:-:-:-
chr02	224791	A	G	Macma4_02_g00140:intron_variant:-:-:-:-:-
chr02	224836	T	C	Macma4_02_g00140:intron_variant:-:-:-:-:-
chr02	224982	C	T	Macma4_02_g00140:intron_variant:-:-:-:-:-
chr02	225276	G	C	Macma4_02_g00140:intron_variant:-:-:-:-:-
chr02	225385	A	T	Macma4_02_g00140:intron_variant:-:-:-:-:-
chr02	225454	T	G	Macma4_02_g00140:intron_variant:-:-:-:-:-
chr02	225501	A	T	Macma4_02_g00140:intron_variant:-:-:-:-:-
chr02	225877	G	A	Macma4_02_g00140:intron_variant:-:-:-:-:-
chr02	225921	C	T	Macma4_02_g00140:intron_variant:-:-:-:-:-
chr02	226011	G	A	Macma4_02_g00140:intron_variant:-:-:-:-:-
chr02	226112	GA	G	Macma4_02_g00140:intron_variant:-:-:-:-:-
chr02	226459	G	A	Macma4_02_g00140:intron_variant:-:-:-:-:-
chr02	226602	G	A	Macma4_02_g00140:intron_variant:-:-:-:-:-
chr02	226673	G	C	Macma4_02_g00140:intron_variant:-:-:-:-:-
chr02	226938	G	C	Macma4_02_g00140:intron_variant:-:-:-:-:-
chr02	227504	G	T	Macma4_02_g00140:intron_variant:-:-:-:-:-
chr02	227641	T	G	Macma4_02_g00140:intron_variant:-:-:-:-:-
chr02	227750	C	T	Macma4_02_g00140:intron_variant:-:-:-:-:-
chr02	227778	T	C	Macma4_02_g00140:intron_variant:-:-:-:-:-
chr02	227796	T	G	Macma4_02_g00140:intron_variant:-:-:-:-:-
chr02	227822	G	A	Macma4_02_g00140:intron_variant:-:-:-:-:-
chr02	227843	T	C	Macma4_02_g00140:intron_variant:-:-:-:-:-
chr02	228922	G	A	Macma4_02_g00140:intron_variant:-:-:-:-:-
chr02	229073	GTTC	G	Macma4_02_g00140:intron_variant:-:-:-:-:-
chr02	229091	T	G	Macma4_02_g00140:intron_variant:-:-:-:-:-
chr02	229762	A	AT	Macma4_02_g00140:intron_variant:-:-:-:-:-
chr02	230853	A	G	Macma4_02_g00140:intron_variant:-:-:-:-:-
chr02	231429	C	T	Macma4_02_g00140:intron_variant:-:-:-:-:-
chr02	231763	T	C	Macma4_02_g00140:intron_variant:-:-:-:-:-
chr02	232419	T	C	Macma4_02_g00140:downstream_gene_variant:-:-:-:-:-
chr02	232549	C	T	Macma4_02_g00140:downstream_gene_variant:-:-:-:-:-
chr02	232661	G	A	Macma4_02_g00140:downstream_gene_variant:-:-:-:-:-
chr02	232817	C	G	Macma4_02_g00140:downstream_gene_variant:-:-:-:-:-
chr02	232922	T	C	Macma4_02_g00140:downstream_gene_variant:-:-:-:-:-
chr02	232935	G	T	Macma4_02_g00140:downstream_gene_variant:-:-:-:-:-
chr02	232975	A	G	Macma4_02_g00140:downstream_gene_variant:-:-:-:-:-
chr02	232983	C	T	Macma4_02_g00140:downstream_gene_variant:-:-:-:-:-
chr02	233062	T	C	Macma4_02_g00140:downstream_gene_variant:-:-:-:-:-
chr02	233175	T	C	Macma4_02_g00140:downstream_gene_variant:-:-:-:-:-
chr02	233194	C	T	Macma4_02_g00140:downstream_gene_variant:-:-:-:-:-
chr02	233264	C	T	Macma4_02_g00140:downstream_gene_variant:-:-:-:-:-
chr02	233314	C	A	Macma4_02_g00140:downstream_gene_variant:-:-:-:-:-
chr02	233713	T	C	Macma4_02_g00140:downstream_gene_variant:-:-:-:-:-
chr02	233739	C	T	Macma4_02_g00140:downstream_gene_variant:-:-:-:-:-
chr02	233768	C	T	Macma4_02_g00140:downstream_gene_variant:-:-:-:-:-
chr02	233814	T	A	Macma4_02_g00140:downstream_gene_variant:-:-:-:-:-
chr02	234129	AT	A	Macma4_02_g00140:downstream_gene_variant:-:-:-:-:-
chr02	234132	T	A	Macma4_02_g00140:downstream_gene_variant:-:-:-:-:-
chr02	234150	G	A	Macma4_02_g00140:downstream_gene_variant:-:-:-:-:-
chr02	234230	T	A	Macma4_02_g00140:downstream_gene_variant:-:-:-:-:-
chr02	234284	A	G	Macma4_02_g00140:downstream_gene_variant:-:-:-:-:-
chr02	234332	A	AAATT	Macma4_02_g00140:downstream_gene_variant:-:-:-:-:-
chr02	234355	AC	A	Macma4_02_g00140:downstream_gene_variant:-:-:-:-:-
chr02	234595	A	G	Macma4_02_g00140:downstream_gene_variant:-:-:-:-:-
chr02	235002	C	T	Macma4_02_g00140:downstream_gene_variant:-:-:-:-:-
chr02	235121	G	A	Macma4_02_g00140:downstream_gene_variant:-:-:-:-:-
chr02	235628	G	A	Macma4_02_g00140:downstream_gene_variant:-:-:-:-:-
chr02	235721	A	T	Macma4_02_g00140:downstream_gene_variant:-:-:-:-:-
chr02	235942	G	A	Macma4_02_g00140:downstream_gene_variant:-:-:-:-:-
chr02	235973	C	T	Macma4_02_g00140:downstream_gene_variant:-:-:-:-:-
chr02	236581	G	A	Macma4_02_g00140:downstream_gene_variant:-:-:-:-:-
chr02	236701	TC	T	Macma4_02_g00140:downstream_gene_variant:-:-:-:-:-
chr02	237302	C	G
chr02	237614	G	A
chr02	237911	CA	C
chr02	238044	C	T
chr02	238055	C	G
chr02	238227	C	G
chr02	238386	G	A
chr02	238644	C	T
chr02	238668	A	T
chr02	238794	G	T
chr02	238806	T	TGTG
chr02	238908	A	T
chr02	238910	T	C
chr02	242358	G	T
chr02	242360	G	A
chr02	242377	T	C
chr02	242389	C	T
chr02	242619	C	T
chr02	242683	G	A
chr02	242713	G	A
chr02	242741	G	T
chr02	242776	C	T
chr02	242863	A	G
chr02	242913	G	A
chr02	242978	C	T
chr02	243023	T	C
chr02	243043	G	A
chr02	243075	G	T
chr02	243186	TA	T
chr02	243247	A	G
chr02	243324	A	G
chr02	243333	C	T
chr02	243510	G	A
chr02	243594	A	G
chr02	243607	C	T
chr02	243679	A	G
chr02	243742	G	A
chr02	243747	A	T
chr02	243759	G	A
chr02	243762	A	T
chr02	243805	C	CTT
chr02	243829	A	G
chr02	243884	C	A
chr02	243893	A	T
chr02	243923	T	G
chr02	243936	C	T
chr02	244081	A	G
chr02	244115	C	A
chr02	244121	G	A
chr02	244146	G	A
chr02	244150	C	T
chr02	244171	C	T
chr02	244181	G	A
chr02	244182	G	A
chr02	244336	C	T
chr02	244384	C	T
chr02	244391	G	A
chr02	244402	C	T
chr02	244483	C	A
chr02	244513	G	A
chr02	244515	G	A
chr02	244540	C	T
chr02	244611	C	T
chr02	244674	G	A
chr02	244742	G	A
chr02	244820	A	T
chr02	244889	A	G
chr02	244916	C	T
chr02	244945	C	T
chr02	244947	G	A
chr02	244955	C	T
chr02	244963	TA	T
chr02	245059	G	A
chr02	250271	G	A
chr02	250289	A	G
chr02	250293	A	G
chr02	250294	A	G
chr02	250310	T	C
chr02	250327	G	A
chr02	250391	C	T
chr02	250403	C	T
chr02	250420	C	T
chr02	250471	T	A
chr02	250486	T	C
chr02	250586	A	G
chr02	250638	C	T
chr02	250719	A	G
chr02	250726	G	A
chr02	250757	C	T
chr02	250784	C	T
chr02	250798	G	A
chr02	250804	C	G
chr02	250858	T	A
chr02	250878	C	A
chr02	250893	G	A
chr02	250899	T	C
chr02	250927	G	A
chr02	250936	T	G
chr02	250940	G	T
chr02	250976	G	A
chr02	251009	C	T
chr02	251083	C	T
chr02	251139	G	A
chr02	251143	G	A
chr02	251157	G	A
chr02	251240	G	A
chr02	251296	C	T
chr02	251373	A	G
chr02	251403	G	A
chr02	251416	G	A
chr02	251417	C	T
chr02	251420	C	A
chr02	251475	C	T
chr02	252061	T	G
chr02	252066	C	T
chr02	252093	T	A
chr02	252204	G	T
chr02	252300	T	G
chr02	252323	G	A
chr02	252446	A	T
chr02	252504	G	A
chr02	252514	G	A
chr02	252521	AG	A
chr02	252527	C	A
chr02	252562	C	T
chr02	252574	G	C
chr02	252575	G	T
chr02	252578	G	A
chr02	252890	G	A
chr02	252901	G	T
chr02	252916	G	A
chr02	252920	C	T
chr02	252959	G	A
chr02	252976	C	T
chr02	253220	G	A
chr02	253234	C	T
chr02	253250	G	A
chr02	253261	C	T
chr02	253273	C	A
chr02	253275	G	A
chr02	253388	G	T
chr02	253390	C	T
chr02	253396	C	T
chr02	253461	G	A
chr02	253473	T	C
chr02	253491	G	A
chr02	253512	G	A
chr02	253522	A	T
chr02	253553	G	A
chr02	253601	G	A
chr02	253689	C	T
chr02	253743	C	T
chr02	253787	A	C
chr02	253805	C	CA
chr02	253854	C	T
chr02	253977	C	T
chr02	253990	T	A
chr02	254051	A	G
chr02	254164	C	G
chr02	254167	A	AAGCATT
chr02	254291	TTCAA	T
chr02	254329	T	A
chr02	254363	C	T
chr02	254383	C	T
chr02	254495	A	G
chr02	254533	T	A
chr02	254586	C	T
chr02	254630	T	A
chr02	254854	C	T
chr02	254863	G	A
chr02	254871	G	T
chr02	254880	TTCA	T
chr02	254986	G	A
chr02	255006	G	A
chr02	255052	C	T
chr02	255099	G	A
chr02	255119	G	A
chr02	255123	C	T
chr02	255132	C	T
chr02	255176	AC	A
chr02	255327	T	C
chr02	255336	C	A
chr02	255458	G	A
chr02	255572	AG	A
chr02	255608	G	A
chr02	256003	C	T
chr02	256062	G	A
chr02	256068	T	A
chr02	256093	C	T
chr02	256255	G	A
chr02	256259	C	G
chr02	256362	G	A
chr02	256459	C	A
chr02	256516	G	A
chr02	256528	T	C
chr02	256535	C	T
chr02	256587	G	A
chr02	256594	C	A
chr02	256615	A	G
chr02	256640	A	C
chr02	256672	C	A
chr02	256677	T	C
chr02	263704	G	A	Macma4_02_g00150:downstream_gene_variant:-:-:-:-:-
chr02	263719	C	T	Macma4_02_g00150:downstream_gene_variant:-:-:-:-:-
chr02	263734	C	T	Macma4_02_g00150:downstream_gene_variant:-:-:-:-:-
chr02	263735	C	T	Macma4_02_g00150:downstream_gene_variant:-:-:-:-:-
chr02	263773	T	G	Macma4_02_g00150:downstream_gene_variant:-:-:-:-:-
chr02	263796	A	AC	Macma4_02_g00150:downstream_gene_variant:-:-:-:-:-
chr02	263818	G	A	Macma4_02_g00150:downstream_gene_variant:-:-:-:-:-
chr02	263835	G	GA	Macma4_02_g00150:downstream_gene_variant:-:-:-:-:-
chr02	263845	G	A	Macma4_02_g00150:downstream_gene_variant:-:-:-:-:-
chr02	263852	A	C	Macma4_02_g00150:downstream_gene_variant:-:-:-:-:-
chr02	263911	A	G	Macma4_02_g00150:downstream_gene_variant:-:-:-:-:-
chr02	264029	T	C	Macma4_02_g00150:downstream_gene_variant:-:-:-:-:-
chr02	264064	G	A	Macma4_02_g00150:downstream_gene_variant:-:-:-:-:-
chr02	264364	G	A	Macma4_02_g00150:downstream_gene_variant:-:-:-:-:-
chr02	264368	C	T	Macma4_02_g00150:downstream_gene_variant:-:-:-:-:-
chr02	264552	C	T	Macma4_02_g00150:downstream_gene_variant:-:-:-:-:-
chr02	264601	G	A	Macma4_02_g00150:downstream_gene_variant:-:-:-:-:-
chr02	264633	G	A	Macma4_02_g00150:downstream_gene_variant:-:-:-:-:-
chr02	264687	A	G	Macma4_02_g00150:downstream_gene_variant:-:-:-:-:-
chr02	264704	C	T	Macma4_02_g00150:downstream_gene_variant:-:-:-:-:-
chr02	264715	C	T	Macma4_02_g00150:downstream_gene_variant:-:-:-:-:-
chr02	264735	C	T	Macma4_02_g00150:downstream_gene_variant:-:-:-:-:-
chr02	264745	G	A	Macma4_02_g00150:downstream_gene_variant:-:-:-:-:-
chr02	264771	G	A	Macma4_02_g00150:downstream_gene_variant:-:-:-:-:-
chr02	264815	C	G	Macma4_02_g00150:downstream_gene_variant:-:-:-:-:-
chr02	264821	T	C	Macma4_02_g00150:downstream_gene_variant:-:-:-:-:-
chr02	264882	G	A	Macma4_02_g00150:downstream_gene_variant:-:-:-:-:-
chr02	264953	C	G	Macma4_02_g00150:downstream_gene_variant:-:-:-:-:-
chr02	264972	A	T	Macma4_02_g00150:downstream_gene_variant:-:-:-:-:-
chr02	265132	A	G	Macma4_02_g00150:downstream_gene_variant:-:-:-:-:-
chr02	265414	G	T	Macma4_02_g00150:downstream_gene_variant:-:-:-:-:-
chr02	265416	G	A	Macma4_02_g00150:downstream_gene_variant:-:-:-:-:-
chr02	265441	C	T	Macma4_02_g00150:downstream_gene_variant:-:-:-:-:-
chr02	265561	C	T	Macma4_02_g00150:downstream_gene_variant:-:-:-:-:-
chr02	265583	G	A	Macma4_02_g00150:downstream_gene_variant:-:-:-:-:-
chr02	265695	G	A	Macma4_02_g00150:downstream_gene_variant:-:-:-:-:-
chr02	265771	C	T	Macma4_02_g00150:downstream_gene_variant:-:-:-:-:-
chr02	265840	C	T	Macma4_02_g00150:downstream_gene_variant:-:-:-:-:-
chr02	265919	AGATTTGTTAGGCAACATT	A	Macma4_02_g00150:downstream_gene_variant:-:-:-:-:-
chr02	266013	C	T	Macma4_02_g00150:downstream_gene_variant:-:-:-:-:-
chr02	266187	C	T	Macma4_02_g00150:downstream_gene_variant:-:-:-:-:-
chr02	266209	G	A	Macma4_02_g00150:downstream_gene_variant:-:-:-:-:-
chr02	266225	C	T	Macma4_02_g00150:downstream_gene_variant:-:-:-:-:-
chr02	266525	C	T	Macma4_02_g00150:downstream_gene_variant:-:-:-:-:-
chr02	266577	C	T	Macma4_02_g00150:downstream_gene_variant:-:-:-:-:-
chr02	266628	G	T	Macma4_02_g00150:downstream_gene_variant:-:-:-:-:-
chr02	266651	C	T	Macma4_02_g00150:downstream_gene_variant:-:-:-:-:-
chr02	266717	G	T	Macma4_02_g00150:downstream_gene_variant:-:-:-:-:-
chr02	266740	C	T	Macma4_02_g00150:downstream_gene_variant:-:-:-:-:-
chr02	266773	C	G	Macma4_02_g00150:downstream_gene_variant:-:-:-:-:-
chr02	266796	G	A	Macma4_02_g00150:downstream_gene_variant:-:-:-:-:-
chr02	266819	G	A	Macma4_02_g00150:downstream_gene_variant:-:-:-:-:-
chr02	266851	C	T	Macma4_02_g00150:downstream_gene_variant:-:-:-:-:-
chr02	266936	C	T	Macma4_02_g00150:downstream_gene_variant:-:-:-:-:-
chr02	267019	C	T	Macma4_02_g00150:downstream_gene_variant:-:-:-:-:-
chr02	267033	A	C	Macma4_02_g00150:downstream_gene_variant:-:-:-:-:-
chr02	267070	AG	A	Macma4_02_g00150:downstream_gene_variant:-:-:-:-:-
chr02	267083	G	A	Macma4_02_g00150:downstream_gene_variant:-:-:-:-:-
chr02	267189	G	A	Macma4_02_g00150:downstream_gene_variant:-:-:-:-:-
chr02	267199	C	T	Macma4_02_g00150:downstream_gene_variant:-:-:-:-:-
chr02	267206	C	T	Macma4_02_g00150:downstream_gene_variant:-:-:-:-:-
chr02	267266	T	C	Macma4_02_g00150:downstream_gene_variant:-:-:-:-:-
chr02	267291	G	A	Macma4_02_g00150:downstream_gene_variant:-:-:-:-:-
chr02	267412	A	G	Macma4_02_g00150:downstream_gene_variant:-:-:-:-:-
chr02	267426	G	A	Macma4_02_g00150:downstream_gene_variant:-:-:-:-:-
chr02	267476	C	T	Macma4_02_g00150:downstream_gene_variant:-:-:-:-:-
chr02	267580	TC	T	Macma4_02_g00150:downstream_gene_variant:-:-:-:-:-
chr02	267610	G	A	Macma4_02_g00150:downstream_gene_variant:-:-:-:-:-
chr02	267639	C	T	Macma4_02_g00150:downstream_gene_variant:-:-:-:-:-
chr02	267658	C	A	Macma4_02_g00150:downstream_gene_variant:-:-:-:-:-
chr02	267684	T	C	Macma4_02_g00150:downstream_gene_variant:-:-:-:-:-
chr02	267688	A	G	Macma4_02_g00150:downstream_gene_variant:-:-:-:-:-
chr02	267717	T	C	Macma4_02_g00150:downstream_gene_variant:-:-:-:-:-
chr02	267863	T	TA	Macma4_02_g00150:downstream_gene_variant:-:-:-:-:-
chr02	267917	A	T	Macma4_02_g00150:downstream_gene_variant:-:-:-:-:-
chr02	268602	C	CT	Macma4_02_g00150:downstream_gene_variant:-:-:-:-:-
chr02	268742	A	G	Macma4_02_g00150:3_prime_UTR_variant:543:-:-:-:-
chr02	269083	C	A	Macma4_02_g00150:intron_variant:-:-:-:-:-
chr02	269088	GC	G	Macma4_02_g00150:intron_variant:-:-:-:-:-
chr02	269156	C	T	Macma4_02_g00150:intron_variant:-:-:-:-:-
chr02	269175	TAG	T	Macma4_02_g00150:intron_variant:-:-:-:-:-
chr02	269279	G	T	Macma4_02_g00150:intron_variant:-:-:-:-:-
chr02	269405	C	A	Macma4_02_g00150:intron_variant:-:-:-:-:-
chr02	269439	C	T	Macma4_02_g00150:intron_variant:-:-:-:-:-
chr02	269459	GT	G	Macma4_02_g00150:intron_variant:-:-:-:-:-
chr02	269563	T	A	Macma4_02_g00150:intron_variant:-:-:-:-:-
chr02	270129	C	T	Macma4_02_g00150:intron_variant:-:-:-:-:-
chr02	270161	T	C	Macma4_02_g00150:intron_variant:-:-:-:-:-
chr02	270401	T	A	Macma4_02_g00150:intron_variant:-:-:-:-:-
chr02	270408	T	C	Macma4_02_g00150:intron_variant:-:-:-:-:-
chr02	270433	G	A	Macma4_02_g00150:intron_variant:-:-:-:-:-
chr02	270468	A	G	Macma4_02_g00150:intron_variant:-:-:-:-:-
chr02	270475	G	A	Macma4_02_g00150:intron_variant:-:-:-:-:-
chr02	270505	G	A	Macma4_02_g00150:intron_variant:-:-:-:-:-
chr02	270561	C	T	Macma4_02_g00150:intron_variant:-:-:-:-:-
chr02	270583	C	T	Macma4_02_g00150:intron_variant:-:-:-:-:-
chr02	270654	G	A	Macma4_02_g00150:intron_variant:-:-:-:-:-
chr02	270690	T	C	Macma4_02_g00150:intron_variant:-:-:-:-:-
chr02	270751	C	T	Macma4_02_g00150:intron_variant:-:-:-:-:-
chr02	270754	A	G	Macma4_02_g00150:intron_variant:-:-:-:-:-
chr02	270806	G	A	Macma4_02_g00150:intron_variant:-:-:-:-:-
chr02	270817	A	G	Macma4_02_g00150:intron_variant:-:-:-:-:-
chr02	270920	A	AT	Macma4_02_g00150:intron_variant:-:-:-:-:-
chr02	270942	T	C	Macma4_02_g00150:intron_variant:-:-:-:-:-
chr02	270961	C	A	Macma4_02_g00150:intron_variant:-:-:-:-:-
chr02	270988	C	T	Macma4_02_g00150:intron_variant:-:-:-:-:-
chr02	271042	T	C	Macma4_02_g00150:intron_variant:-:-:-:-:-
chr02	271045	A	G	Macma4_02_g00150:intron_variant:-:-:-:-:-
chr02	271058	T	C	Macma4_02_g00150:intron_variant:-:-:-:-:-
chr02	271071	T	C	Macma4_02_g00150:intron_variant:-:-:-:-:-
chr02	271086	CG	C	Macma4_02_g00150:intron_variant:-:-:-:-:-
chr02	271138	G	A	Macma4_02_g00150:intron_variant:-:-:-:-:-
chr02	271304	C	T	Macma4_02_g00150:intron_variant:-:-:-:-:-
chr02	271630	C	A	Macma4_02_g00150:intron_variant:-:-:-:-:-
chr02	271650	A	G	Macma4_02_g00150:intron_variant:-:-:-:-:-
chr02	271774	A	G	Macma4_02_g00150:intron_variant:-:-:-:-:-
chr02	271792	A	T	Macma4_02_g00150:intron_variant:-:-:-:-:-
chr02	271869	T	A	Macma4_02_g00150:intron_variant:-:-:-:-:-
chr02	272240	A	T	Macma4_02_g00150:intron_variant:-:-:-:-:-
chr02	272279	T	C	Macma4_02_g00150:intron_variant:-:-:-:-:-
chr02	272788	T	G	Macma4_02_g00150:intron_variant:-:-:-:-:-
chr02	272833	C	G	Macma4_02_g00150:intron_variant:-:-:-:-:-
chr02	272842	C	T	Macma4_02_g00150:intron_variant:-:-:-:-:-
chr02	272964	T	G	Macma4_02_g00150:intron_variant:-:-:-:-:-
chr02	273055	T	G	Macma4_02_g00150:synonymous_variant:116:78:26:G:ggA/ggC
chr02	273158	G	A	Macma4_02_g00150:5_prime_UTR_variant:13:-:-:-:-
chr02	273163	A	G	Macma4_02_g00150:5_prime_UTR_variant:8:-:-:-:-
chr02	273183	C	A	Macma4_02_g00150:upstream_gene_variant:-:-:-:-:-
chr02	273281	ACT	A	Macma4_02_g00150:upstream_gene_variant:-:-:-:-:-
chr02	273300	G	A	Macma4_02_g00150:upstream_gene_variant:-:-:-:-:-
chr02	273389	G	A	Macma4_02_g00150:upstream_gene_variant:-:-:-:-:-
chr02	273428	T	C	Macma4_02_g00150:upstream_gene_variant:-:-:-:-:-
chr02	273568	G	A	Macma4_02_g00150:upstream_gene_variant:-:-:-:-:-
chr02	273593	A	G	Macma4_02_g00150:upstream_gene_variant:-:-:-:-:-
chr02	273622	A	G	Macma4_02_g00150:upstream_gene_variant:-:-:-:-:-
chr02	273694	G	A	Macma4_02_g00150:upstream_gene_variant:-:-:-:-:-
chr02	273697	G	A	Macma4_02_g00150:upstream_gene_variant:-:-:-:-:-
chr02	273724	A	C	Macma4_02_g00150:upstream_gene_variant:-:-:-:-:-
chr02	273818	G	T	Macma4_02_g00150:upstream_gene_variant:-:-:-:-:-
chr02	273941	T	C	Macma4_02_g00150:upstream_gene_variant:-:-:-:-:-
chr02	273966	A	G	Macma4_02_g00150:upstream_gene_variant:-:-:-:-:-
chr02	274063	A	G	Macma4_02_g00150:upstream_gene_variant:-:-:-:-:-
chr02	274102	G	A	Macma4_02_g00150:upstream_gene_variant:-:-:-:-:-
chr02	274141	A	G	Macma4_02_g00150:upstream_gene_variant:-:-:-:-:-
chr02	274191	C	T	Macma4_02_g00150:upstream_gene_variant:-:-:-:-:-
chr02	274194	A	G	Macma4_02_g00150:upstream_gene_variant:-:-:-:-:-
chr02	274313	C	T	Macma4_02_g00150:upstream_gene_variant:-:-:-:-:-
chr02	274341	C	A	Macma4_02_g00150:upstream_gene_variant:-:-:-:-:-
chr02	274367	G	A	Macma4_02_g00150:upstream_gene_variant:-:-:-:-:-
chr02	274380	C	T	Macma4_02_g00150:upstream_gene_variant:-:-:-:-:-
chr02	274437	G	A	Macma4_02_g00150:upstream_gene_variant:-:-:-:-:-
chr02	274462	C	G	Macma4_02_g00150:upstream_gene_variant:-:-:-:-:-
chr02	274730	T	TA	Macma4_02_g00150:upstream_gene_variant:-:-:-:-:-
chr02	275457	C	T	Macma4_02_g00150:upstream_gene_variant:-:-:-:-:-
chr02	275478	C	T	Macma4_02_g00150:upstream_gene_variant:-:-:-:-:-
chr02	275492	C	T	Macma4_02_g00150:upstream_gene_variant:-:-:-:-:-
chr02	275581	G	T	Macma4_02_g00150:upstream_gene_variant:-:-:-:-:-
chr02	275591	C	T	Macma4_02_g00150:upstream_gene_variant:-:-:-:-:-
chr02	275888	A	C	Macma4_02_g00150:upstream_gene_variant:-:-:-:-:-
chr02	276780	T	G	Macma4_02_g00150:upstream_gene_variant:-:-:-:-:-
chr02	277024	GA	G	Macma4_02_g00150:upstream_gene_variant:-:-:-:-:-
chr02	277575	C	T	Macma4_02_g00150:upstream_gene_variant:-:-:-:-:-
chr02	277808	G	A	Macma4_02_g00150:upstream_gene_variant:-:-:-:-:-
chr02	278099	A	G	Macma4_02_g00150:upstream_gene_variant:-:-:-:-:-
chr02	278204	G	A
chr02	278320	T	A
chr02	278416	A	T
chr02	278463	T	C
chr02	278654	T	A
chr02	279789	C	T
chr02	279790	A	G
chr02	279889	GAAGT	G
chr02	280208	G	A	Macma4_02_g00160:upstream_gene_variant:-:-:-:-:-
chr02	280219	G	A	Macma4_02_g00160:upstream_gene_variant:-:-:-:-:-
chr02	280223	C	T	Macma4_02_g00160:upstream_gene_variant:-:-:-:-:-
chr02	280233	C	T	Macma4_02_g00160:upstream_gene_variant:-:-:-:-:-
chr02	280235	GT	G	Macma4_02_g00160:upstream_gene_variant:-:-:-:-:-
chr02	280353	C	A	Macma4_02_g00160:upstream_gene_variant:-:-:-:-:-
chr02	280389	G	A	Macma4_02_g00160:upstream_gene_variant:-:-:-:-:-
chr02	280577	C	A	Macma4_02_g00160:upstream_gene_variant:-:-:-:-:-
chr02	282311	C	T	Macma4_02_g00160:upstream_gene_variant:-:-:-:-:-
chr02	282330	A	G	Macma4_02_g00160:upstream_gene_variant:-:-:-:-:-
chr02	282363	C	T	Macma4_02_g00160:upstream_gene_variant:-:-:-:-:-
chr02	282370	A	G	Macma4_02_g00160:upstream_gene_variant:-:-:-:-:-
chr02	282371	C	T	Macma4_02_g00160:upstream_gene_variant:-:-:-:-:-
chr02	282391	A	G	Macma4_02_g00160:upstream_gene_variant:-:-:-:-:-
chr02	282620	G	A	Macma4_02_g00160:upstream_gene_variant:-:-:-:-:-
chr02	282629	G	A	Macma4_02_g00160:upstream_gene_variant:-:-:-:-:-
chr02	282850	A	T	Macma4_02_g00160:upstream_gene_variant:-:-:-:-:-
chr02	282982	G	T	Macma4_02_g00160:upstream_gene_variant:-:-:-:-:-
chr02	283025	G	A	Macma4_02_g00160:upstream_gene_variant:-:-:-:-:-
chr02	283099	C	T	Macma4_02_g00160:upstream_gene_variant:-:-:-:-:-
chr02	283160	T	G	Macma4_02_g00160:upstream_gene_variant:-:-:-:-:-
chr02	283209	G	C	Macma4_02_g00160:upstream_gene_variant:-:-:-:-:-
chr02	283308	G	A	Macma4_02_g00160:upstream_gene_variant:-:-:-:-:-
chr02	283326	G	A	Macma4_02_g00160:upstream_gene_variant:-:-:-:-:-
chr02	283327	G	A	Macma4_02_g00160:upstream_gene_variant:-:-:-:-:-
chr02	285598	G	T	Macma4_02_g00160:synonymous_variant:641:549:183:G:ggG/ggT
chr02	285836	T	C	Macma4_02_g00160:3_prime_UTR_variant:879:-:-:-:-
chr02	286021	A	G	Macma4_02_g00160:downstream_gene_variant:-:-:-:-:-
chr02	286175	C	A	Macma4_02_g00160:downstream_gene_variant:-:-:-:-:-
chr02	286182	CTA	C	Macma4_02_g00160:downstream_gene_variant:-:-:-:-:-
chr02	286204	T	C	Macma4_02_g00160:downstream_gene_variant:-:-:-:-:-
chr02	286249	T	G	Macma4_02_g00160:downstream_gene_variant:-:-:-:-:-
chr02	286261	A	G	Macma4_02_g00160:downstream_gene_variant:-:-:-:-:-
chr02	286322	G	T	Macma4_02_g00160:downstream_gene_variant:-:-:-:-:-
chr02	286324	ATAGAGGATTTTCC	A	Macma4_02_g00160:downstream_gene_variant:-:-:-:-:-
chr02	286363	G	A	Macma4_02_g00160:downstream_gene_variant:-:-:-:-:-
chr02	286480	C	T	Macma4_02_g00160:downstream_gene_variant:-:-:-:-:-
chr02	288157	G	T	Macma4_02_g00160:downstream_gene_variant:-:-:-:-:-
chr02	288160	C	T	Macma4_02_g00160:downstream_gene_variant:-:-:-:-:-
chr02	288164	A	G	Macma4_02_g00160:downstream_gene_variant:-:-:-:-:-
chr02	288168	A	T	Macma4_02_g00160:downstream_gene_variant:-:-:-:-:-
chr02	288175	A	G	Macma4_02_g00160:downstream_gene_variant:-:-:-:-:-
chr02	288178	A	G	Macma4_02_g00160:downstream_gene_variant:-:-:-:-:-
chr02	298326	C	T
chr02	298344	C	T
chr02	298407	T	C
chr02	309578	G	GA
chr02	309586	T	A
chr02	309609	C	T
chr02	309615	C	A
chr02	309658	G	A
chr02	335329	C	T
chr02	335420	A	T
chr02	337281	T	C
chr02	337308	C	T
chr02	362667	ATCAATTTATTTACGAACG	A	Macma4_02_g00170:upstream_gene_variant:-:-:-:-:-
chr02	362868	C	T	Macma4_02_g00170:upstream_gene_variant:-:-:-:-:-
chr02	363414	C	T	Macma4_02_g00170:upstream_gene_variant:-:-:-:-:-
chr02	363455	G	A	Macma4_02_g00170:upstream_gene_variant:-:-:-:-:-
chr02	364683	C	T	Macma4_02_g00170:downstream_gene_variant:-:-:-:-:-, Macma4_02_g00180:downstream_gene_variant:-:-:-:-:-
chr02	364837	G	A	Macma4_02_g00170:downstream_gene_variant:-:-:-:-:-, Macma4_02_g00180:downstream_gene_variant:-:-:-:-:-
chr02	364974	G	A	Macma4_02_g00170:downstream_gene_variant:-:-:-:-:-, Macma4_02_g00180:downstream_gene_variant:-:-:-:-:-
chr02	365014	G	T	Macma4_02_g00170:downstream_gene_variant:-:-:-:-:-, Macma4_02_g00180:downstream_gene_variant:-:-:-:-:-
chr02	365217	C	T	Macma4_02_g00170:downstream_gene_variant:-:-:-:-:-, Macma4_02_g00180:downstream_gene_variant:-:-:-:-:-
chr02	365311	A	T	Macma4_02_g00170:downstream_gene_variant:-:-:-:-:-, Macma4_02_g00180:downstream_gene_variant:-:-:-:-:-
chr02	365341	T	A	Macma4_02_g00170:downstream_gene_variant:-:-:-:-:-, Macma4_02_g00180:downstream_gene_variant:-:-:-:-:-
chr02	365449	G	A	Macma4_02_g00170:downstream_gene_variant:-:-:-:-:-, Macma4_02_g00180:downstream_gene_variant:-:-:-:-:-
chr02	365475	G	A	Macma4_02_g00170:downstream_gene_variant:-:-:-:-:-, Macma4_02_g00180:downstream_gene_variant:-:-:-:-:-
chr02	365865	C	T	Macma4_02_g00170:downstream_gene_variant:-:-:-:-:-, Macma4_02_g00180:downstream_gene_variant:-:-:-:-:-
chr02	365907	G	T	Macma4_02_g00170:downstream_gene_variant:-:-:-:-:-, Macma4_02_g00180:downstream_gene_variant:-:-:-:-:-
chr02	366785	G	A	Macma4_02_g00170:downstream_gene_variant:-:-:-:-:-, Macma4_02_g00180:downstream_gene_variant:-:-:-:-:-
chr02	366792	G	T	Macma4_02_g00170:downstream_gene_variant:-:-:-:-:-, Macma4_02_g00180:downstream_gene_variant:-:-:-:-:-
chr02	367095	A	G	Macma4_02_g00170:downstream_gene_variant:-:-:-:-:-, Macma4_02_g00180:downstream_gene_variant:-:-:-:-:-
chr02	367184	G	A	Macma4_02_g00170:downstream_gene_variant:-:-:-:-:-, Macma4_02_g00180:downstream_gene_variant:-:-:-:-:-
chr02	367308	T	G	Macma4_02_g00170:downstream_gene_variant:-:-:-:-:-, Macma4_02_g00180:downstream_gene_variant:-:-:-:-:-
chr02	367399	G	A	Macma4_02_g00170:downstream_gene_variant:-:-:-:-:-, Macma4_02_g00180:downstream_gene_variant:-:-:-:-:-
chr02	367427	A	G	Macma4_02_g00170:downstream_gene_variant:-:-:-:-:-, Macma4_02_g00180:downstream_gene_variant:-:-:-:-:-
chr02	367851	G	A	Macma4_02_g00170:downstream_gene_variant:-:-:-:-:-, Macma4_02_g00180:downstream_gene_variant:-:-:-:-:-
chr02	368504	GTT	G	Macma4_02_g00170:downstream_gene_variant:-:-:-:-:-, Macma4_02_g00180:downstream_gene_variant:-:-:-:-:-
chr02	368746	A	G	Macma4_02_g00170:downstream_gene_variant:-:-:-:-:-, Macma4_02_g00180:downstream_gene_variant:-:-:-:-:-
chr02	368796	T	A	Macma4_02_g00170:downstream_gene_variant:-:-:-:-:-, Macma4_02_g00180:downstream_gene_variant:-:-:-:-:-
chr02	368810	TTTATTTAGTTTTATAG	T	Macma4_02_g00170:downstream_gene_variant:-:-:-:-:-, Macma4_02_g00180:downstream_gene_variant:-:-:-:-:-
chr02	369049	T	G	Macma4_02_g00170:downstream_gene_variant:-:-:-:-:-, Macma4_02_g00180:downstream_gene_variant:-:-:-:-:-
chr02	369135	T	G	Macma4_02_g00170:downstream_gene_variant:-:-:-:-:-, Macma4_02_g00180:3_prime_UTR_variant:814:-:-:-:-
chr02	369852	A	G	Macma4_02_g00180:intron_variant:-:-:-:-:-
chr02	370294	A	G	Macma4_02_g00180:intron_variant:-:-:-:-:-
chr02	370375	C	T	Macma4_02_g00180:intron_variant:-:-:-:-:-
chr02	370972	A	C	Macma4_02_g00180:intron_variant:-:-:-:-:-
chr02	370989	T	C	Macma4_02_g00180:intron_variant:-:-:-:-:-
chr02	371233	G	T	Macma4_02_g00180:intron_variant:-:-:-:-:-
chr02	371681	G	C	Macma4_02_g00180:intron_variant:-:-:-:-:-
chr02	371799	TA	T	Macma4_02_g00180:intron_variant:-:-:-:-:-
chr02	371918	T	TA	Macma4_02_g00180:intron_variant:-:-:-:-:-
chr02	373617	C	T	Macma4_02_g00180:intron_variant:-:-:-:-:-
chr02	374824	A	T	Macma4_02_g00180:intron_variant:-:-:-:-:-
chr02	374861	T	C	Macma4_02_g00180:intron_variant:-:-:-:-:-
chr02	375054	C	G	Macma4_02_g00180:intron_variant:-:-:-:-:-
chr02	375239	C	A	Macma4_02_g00180:intron_variant:-:-:-:-:-
chr02	375347	C	A	Macma4_02_g00180:intron_variant:-:-:-:-:-
chr02	375348	T	G	Macma4_02_g00180:intron_variant:-:-:-:-:-
chr02	375390	C	T	Macma4_02_g00180:intron_variant:-:-:-:-:-
chr02	375516	A	G	Macma4_02_g00180:intron_variant:-:-:-:-:-
chr02	375550	A	G	Macma4_02_g00180:intron_variant:-:-:-:-:-
chr02	376208	A	G	Macma4_02_g00180:intron_variant:-:-:-:-:-
chr02	376376	C	T	Macma4_02_g00180:missense_variant:128:125:42:R/H:cGc/cAc
chr02	376395	G	A	Macma4_02_g00180:missense_variant:109:106:36:R/C:Cgc/Tgc
chr02	376497	C	A	Macma4_02_g00180:missense_variant:7:4:2:G/W:Ggg/Tgg
chr02	376559	TC	T	Macma4_02_g00180:upstream_gene_variant:-:-:-:-:-
chr02	376628	C	A	Macma4_02_g00180:upstream_gene_variant:-:-:-:-:-
chr02	376898	A	C	Macma4_02_g00180:upstream_gene_variant:-:-:-:-:-
chr02	377024	G	A	Macma4_02_g00180:upstream_gene_variant:-:-:-:-:-
chr02	377105	C	T	Macma4_02_g00180:upstream_gene_variant:-:-:-:-:-
chr02	377137	CCGTGCAAGGG	C	Macma4_02_g00180:upstream_gene_variant:-:-:-:-:-
chr02	377180	A	T	Macma4_02_g00180:upstream_gene_variant:-:-:-:-:-
chr02	377203	T	A	Macma4_02_g00180:upstream_gene_variant:-:-:-:-:-
chr02	377395	T	G	Macma4_02_g00180:upstream_gene_variant:-:-:-:-:-
chr02	377415	T	C	Macma4_02_g00180:upstream_gene_variant:-:-:-:-:-
chr02	377781	C	T	Macma4_02_g00180:upstream_gene_variant:-:-:-:-:-
chr02	380972	G	A	Macma4_02_g00180:upstream_gene_variant:-:-:-:-:-
chr02	381055	C	T	Macma4_02_g00180:upstream_gene_variant:-:-:-:-:-
chr02	381589	C	A
chr02	382775	G	C
chr02	382826	T	C
chr02	382827	G	A
chr02	382957	A	G
chr02	383302	C	T
chr02	383339	C	T
chr02	383901	C	T
chr02	383918	C	T
chr02	383947	G	A
chr02	384234	C	T
chr02	384328	G	A
chr02	384784	G	A
chr02	385079	G	A
chr02	385128	C	A
chr02	385159	G	A
chr02	385202	C	T
chr02	385228	G	A
chr02	385245	C	T
chr02	385257	C	T
chr02	385395	C	T
chr02	385452	C	G
chr02	386142	A	T
chr02	386229	C	A
chr02	386371	A	C
chr02	386592	G	A
chr02	386611	G	A
chr02	386615	G	A
chr02	386770	G	A
chr02	386946	G	T
chr02	386950	G	A
chr02	386988	AT	A
chr02	387338	G	A
chr02	387665	C	T
chr02	387748	AG	A
chr02	410638	T	A	Macma4_02_g00190:downstream_gene_variant:-:-:-:-:-
chr02	410659	A	G	Macma4_02_g00190:downstream_gene_variant:-:-:-:-:-
chr02	410719	A	G	Macma4_02_g00190:downstream_gene_variant:-:-:-:-:-
chr02	410737	A	T	Macma4_02_g00190:downstream_gene_variant:-:-:-:-:-
chr02	410805	TC	T	Macma4_02_g00190:downstream_gene_variant:-:-:-:-:-
chr02	410807	A	G	Macma4_02_g00190:downstream_gene_variant:-:-:-:-:-
chr02	410810	C	T	Macma4_02_g00190:downstream_gene_variant:-:-:-:-:-
chr02	410817	A	T	Macma4_02_g00190:downstream_gene_variant:-:-:-:-:-
chr02	410843	C	G	Macma4_02_g00190:downstream_gene_variant:-:-:-:-:-
chr02	410869	A	T	Macma4_02_g00190:downstream_gene_variant:-:-:-:-:-
chr02	410872	C	G	Macma4_02_g00190:downstream_gene_variant:-:-:-:-:-
chr02	410893	T	A	Macma4_02_g00190:downstream_gene_variant:-:-:-:-:-
chr02	410897	A	G	Macma4_02_g00190:downstream_gene_variant:-:-:-:-:-
chr02	410948	A	T	Macma4_02_g00190:downstream_gene_variant:-:-:-:-:-
chr02	410993	A	T	Macma4_02_g00190:downstream_gene_variant:-:-:-:-:-
chr02	411090	G	T	Macma4_02_g00190:downstream_gene_variant:-:-:-:-:-
chr02	411363	G	C	Macma4_02_g00190:downstream_gene_variant:-:-:-:-:-
chr02	411510	G	A	Macma4_02_g00190:3_prime_UTR_variant:3743:-:-:-:-
chr02	411918	C	T	Macma4_02_g00190:missense_variant:3335:3115:1039:V/I:Gtt/Att
chr02	412574	T	TA	Macma4_02_g00190:intron_variant:-:-:-:-:-
chr02	412582	T	A	Macma4_02_g00190:intron_variant:-:-:-:-:-
chr02	412792	T	C	Macma4_02_g00190:intron_variant:-:-:-:-:-
chr02	413098	A	G	Macma4_02_g00190:intron_variant:-:-:-:-:-
chr02	414378	C	T	Macma4_02_g00190:intron_variant:-:-:-:-:-
chr02	414545	T	A	Macma4_02_g00190:intron_variant:-:-:-:-:-
chr02	415373	TAC	T	Macma4_02_g00190:intron_variant:-:-:-:-:-
chr02	415572	G	A	Macma4_02_g00190:intron_variant:-:-:-:-:-
chr02	415648	C	T	Macma4_02_g00190:intron_variant:-:-:-:-:-
chr02	416816	C	A	Macma4_02_g00190:intron_variant:-:-:-:-:-
chr02	417048	G	A	Macma4_02_g00190:intron_variant:-:-:-:-:-
chr02	417636	G	A	Macma4_02_g00190:intron_variant:-:-:-:-:-
chr02	418383	C	A	Macma4_02_g00190:intron_variant:-:-:-:-:-
chr02	418824	A	G	Macma4_02_g00190:intron_variant:-:-:-:-:-
chr02	419410	T	C	Macma4_02_g00190:missense_variant:2810:2590:864:T/A:Acg/Gcg
chr02	419612	A	G	Macma4_02_g00190:intron_variant:-:-:-:-:-
chr02	420211	G	C	Macma4_02_g00190:intron_variant:-:-:-:-:-
chr02	422070	G	C	Macma4_02_g00190:intron_variant:-:-:-:-:-
chr02	422215	A	C	Macma4_02_g00190:intron_variant:-:-:-:-:-
chr02	422216	G	C	Macma4_02_g00190:intron_variant:-:-:-:-:-
chr02	422520	C	T	Macma4_02_g00190:intron_variant:-:-:-:-:-
chr02	422668	C	T	Macma4_02_g00190:intron_variant:-:-:-:-:-
chr02	422759	GCAGA	G	Macma4_02_g00190:intron_variant:-:-:-:-:-
chr02	422952	C	A	Macma4_02_g00190:intron_variant:-:-:-:-:-
chr02	423034	G	A	Macma4_02_g00190:intron_variant:-:-:-:-:-
chr02	424055	G	A	Macma4_02_g00190:intron_variant:-:-:-:-:-
chr02	424213	G	A	Macma4_02_g00190:intron_variant:-:-:-:-:-
chr02	424576	C	T	Macma4_02_g00190:intron_variant:-:-:-:-:-
chr02	424762	C	A	Macma4_02_g00190:intron_variant:-:-:-:-:-
chr02	424855	G	A	Macma4_02_g00190:intron_variant:-:-:-:-:-
chr02	424946	CAA	C	Macma4_02_g00190:intron_variant:-:-:-:-:-
chr02	425017	C	T	Macma4_02_g00190:intron_variant:-:-:-:-:-
chr02	425595	A	G	Macma4_02_g00190:intron_variant:-:-:-:-:-
chr02	425659	G	A	Macma4_02_g00190:intron_variant:-:-:-:-:-
chr02	425734	C	T	Macma4_02_g00190:intron_variant:-:-:-:-:-
chr02	425907	T	A	Macma4_02_g00190:intron_variant:-:-:-:-:-
chr02	426067	C	T	Macma4_02_g00190:intron_variant:-:-:-:-:-
chr02	426080	G	A	Macma4_02_g00190:intron_variant:-:-:-:-:-
chr02	426117	T	G	Macma4_02_g00190:intron_variant:-:-:-:-:-
chr02	426467	A	T	Macma4_02_g00190:intron_variant:-:-:-:-:-
chr02	426748	C	T	Macma4_02_g00190:intron_variant:-:-:-:-:-
chr02	426944	C	T	Macma4_02_g00190:intron_variant:-:-:-:-:-
chr02	427416	G	T	Macma4_02_g00190:intron_variant:-:-:-:-:-
chr02	428230	G	A	Macma4_02_g00190:intron_variant:-:-:-:-:-
chr02	428450	G	A	Macma4_02_g00190:intron_variant:-:-:-:-:-
chr02	428638	T	G	Macma4_02_g00190:intron_variant:-:-:-:-:-
chr02	428756	G	A	Macma4_02_g00190:intron_variant:-:-:-:-:-
chr02	429052	C	T	Macma4_02_g00190:intron_variant:-:-:-:-:-
chr02	429407	T	C	Macma4_02_g00190:intron_variant:-:-:-:-:-
chr02	429684	C	T	Macma4_02_g00190:intron_variant:-:-:-:-:-
chr02	429740	T	C	Macma4_02_g00190:intron_variant:-:-:-:-:-
chr02	429766	G	A	Macma4_02_g00190:intron_variant:-:-:-:-:-
chr02	430073	T	C	Macma4_02_g00190:intron_variant:-:-:-:-:-
chr02	430074	G	A	Macma4_02_g00190:intron_variant:-:-:-:-:-
chr02	430711	G	A	Macma4_02_g00190:intron_variant:-:-:-:-:-
chr02	430923	A	T	Macma4_02_g00190:intron_variant:-:-:-:-:-
chr02	432113	C	A	Macma4_02_g00190:intron_variant:-:-:-:-:-
chr02	432114	C	A	Macma4_02_g00190:intron_variant:-:-:-:-:-
chr02	432206	G	A	Macma4_02_g00190:intron_variant:-:-:-:-:-
chr02	432236	G	A	Macma4_02_g00190:intron_variant:-:-:-:-:-
chr02	434918	A	G	Macma4_02_g00190:intron_variant:-:-:-:-:-
chr02	435061	T	C	Macma4_02_g00190:intron_variant:-:-:-:-:-
chr02	435148	G	A	Macma4_02_g00190:intron_variant:-:-:-:-:-
chr02	435172	G	A	Macma4_02_g00190:intron_variant:-:-:-:-:-
chr02	435213	G	A	Macma4_02_g00190:intron_variant:-:-:-:-:-
chr02	436801	C	T	Macma4_02_g00190:intron_variant:-:-:-:-:-
chr02	437102	C	T	Macma4_02_g00190:intron_variant:-:-:-:-:-
chr02	437167	TAA	T	Macma4_02_g00190:intron_variant:-:-:-:-:-
chr02	437238	G	A	Macma4_02_g00190:intron_variant:-:-:-:-:-
chr02	438214	A	G	Macma4_02_g00190:intron_variant:-:-:-:-:-
chr02	438491	G	A	Macma4_02_g00190:intron_variant:-:-:-:-:-
chr02	438554	T	C	Macma4_02_g00190:intron_variant:-:-:-:-:-
chr02	438822	T	C	Macma4_02_g00190:intron_variant:-:-:-:-:-
chr02	438973	G	A	Macma4_02_g00190:intron_variant:-:-:-:-:-
chr02	439378	T	C	Macma4_02_g00190:intron_variant:-:-:-:-:-
chr02	439594	A	G	Macma4_02_g00190:intron_variant:-:-:-:-:-
chr02	440720	T	C	Macma4_02_g00190:intron_variant:-:-:-:-:-
chr02	441597	G	A	Macma4_02_g00190:intron_variant:-:-:-:-:-
chr02	441771	C	CG	Macma4_02_g00190:intron_variant:-:-:-:-:-
chr02	442690	A	G	Macma4_02_g00190:intron_variant:-:-:-:-:-
chr02	443295	C	A	Macma4_02_g00190:intron_variant:-:-:-:-:-
chr02	444043	C	A	Macma4_02_g00190:intron_variant:-:-:-:-:-
chr02	444503	C	T	Macma4_02_g00190:intron_variant:-:-:-:-:-
chr02	444755	G	A	Macma4_02_g00190:intron_variant:-:-:-:-:-
chr02	444900	C	T	Macma4_02_g00190:intron_variant:-:-:-:-:-
chr02	445008	C	A	Macma4_02_g00190:intron_variant:-:-:-:-:-
chr02	445039	C	G	Macma4_02_g00190:intron_variant:-:-:-:-:-
chr02	445063	G	A	Macma4_02_g00190:intron_variant:-:-:-:-:-
chr02	445064	C	T	Macma4_02_g00190:intron_variant:-:-:-:-:-
chr02	445070	G	A	Macma4_02_g00190:intron_variant:-:-:-:-:-
chr02	445205	C	A	Macma4_02_g00190:intron_variant:-:-:-:-:-
chr02	445421	C	T	Macma4_02_g00190:intron_variant:-:-:-:-:-
chr02	445550	C	T	Macma4_02_g00190:intron_variant:-:-:-:-:-
chr02	445694	C	A	Macma4_02_g00190:intron_variant:-:-:-:-:-
chr02	446066	T	A	Macma4_02_g00190:intron_variant:-:-:-:-:-
chr02	446069	G	A	Macma4_02_g00190:intron_variant:-:-:-:-:-
chr02	446206	T	A	Macma4_02_g00190:intron_variant:-:-:-:-:-
chr02	446836	T	G	Macma4_02_g00190:intron_variant:-:-:-:-:-
chr02	448076	C	T	Macma4_02_g00190:intron_variant:-:-:-:-:-
chr02	448168	T	C	Macma4_02_g00190:intron_variant:-:-:-:-:-
chr02	448195	C	A	Macma4_02_g00190:intron_variant:-:-:-:-:-
chr02	448385	T	C	Macma4_02_g00190:intron_variant:-:-:-:-:-
chr02	448426	G	A	Macma4_02_g00190:intron_variant:-:-:-:-:-
chr02	449457	T	A	Macma4_02_g00190:intron_variant:-:-:-:-:-
chr02	450094	A	T	Macma4_02_g00190:intron_variant:-:-:-:-:-
chr02	450246	G	A	Macma4_02_g00190:intron_variant:-:-:-:-:-
chr02	451242	A	G	Macma4_02_g00190:intron_variant:-:-:-:-:-
chr02	452358	CAA	C	Macma4_02_g00190:intron_variant:-:-:-:-:-
chr02	452460	T	A	Macma4_02_g00190:intron_variant:-:-:-:-:-
chr02	452667	AC	A	Macma4_02_g00190:intron_variant:-:-:-:-:-
chr02	452930	C	T	Macma4_02_g00190:intron_variant:-:-:-:-:-
chr02	453162	G	A	Macma4_02_g00190:intron_variant:-:-:-:-:-
chr02	453267	T	A	Macma4_02_g00190:intron_variant:-:-:-:-:-
chr02	453356	G	A	Macma4_02_g00190:intron_variant:-:-:-:-:-
chr02	453387	A	T	Macma4_02_g00190:intron_variant:-:-:-:-:-
chr02	453549	G	A	Macma4_02_g00190:intron_variant:-:-:-:-:-
chr02	453550	T	A	Macma4_02_g00190:intron_variant:-:-:-:-:-
chr02	453551	T	A	Macma4_02_g00190:intron_variant:-:-:-:-:-
chr02	453637	TA	T	Macma4_02_g00190:intron_variant:-:-:-:-:-
chr02	453808	G	A	Macma4_02_g00190:intron_variant:-:-:-:-:-
chr02	453870	G	A	Macma4_02_g00190:intron_variant:-:-:-:-:-
chr02	453907	C	T	Macma4_02_g00190:intron_variant:-:-:-:-:-
chr02	453919	C	T	Macma4_02_g00190:intron_variant:-:-:-:-:-
chr02	453999	G	A	Macma4_02_g00190:intron_variant:-:-:-:-:-
chr02	454083	C	T	Macma4_02_g00190:intron_variant:-:-:-:-:-
chr02	454130	G	A	Macma4_02_g00190:intron_variant:-:-:-:-:-
chr02	454601	C	T	Macma4_02_g00190:intron_variant:-:-:-:-:-
chr02	454946	C	T	Macma4_02_g00190:intron_variant:-:-:-:-:-
chr02	455608	G	A	Macma4_02_g00190:intron_variant:-:-:-:-:-
chr02	455633	G	A	Macma4_02_g00190:intron_variant:-:-:-:-:-
chr02	455791	A	G	Macma4_02_g00190:intron_variant:-:-:-:-:-
chr02	455829	G	A	Macma4_02_g00190:intron_variant:-:-:-:-:-
chr02	455903	C	T	Macma4_02_g00190:intron_variant:-:-:-:-:-
chr02	456010	T	A	Macma4_02_g00190:intron_variant:-:-:-:-:-
chr02	456063	A	G	Macma4_02_g00190:intron_variant:-:-:-:-:-
chr02	456085	C	T	Macma4_02_g00190:intron_variant:-:-:-:-:-
chr02	456155	C	T	Macma4_02_g00190:intron_variant:-:-:-:-:-
chr02	456235	C	T	Macma4_02_g00190:intron_variant:-:-:-:-:-
chr02	456368	C	G	Macma4_02_g00190:intron_variant:-:-:-:-:-
chr02	456648	C	T	Macma4_02_g00190:intron_variant:-:-:-:-:-
chr02	457283	G	A	Macma4_02_g00190:intron_variant:-:-:-:-:-
chr02	457520	G	A	Macma4_02_g00190:intron_variant:-:-:-:-:-
chr02	457632	G	A	Macma4_02_g00190:intron_variant:-:-:-:-:-
chr02	457679	C	T	Macma4_02_g00190:intron_variant:-:-:-:-:-
chr02	457713	C	T	Macma4_02_g00190:intron_variant:-:-:-:-:-
chr02	458199	G	A	Macma4_02_g00190:intron_variant:-:-:-:-:-
chr02	458248	G	A	Macma4_02_g00190:intron_variant:-:-:-:-:-
chr02	458328	TGTCA	T	Macma4_02_g00190:intron_variant:-:-:-:-:-
chr02	458608	C	G	Macma4_02_g00190:intron_variant:-:-:-:-:-
chr02	458947	CACATAGAAG	C	Macma4_02_g00190:intron_variant:-:-:-:-:-
chr02	459002	G	T	Macma4_02_g00190:intron_variant:-:-:-:-:-
chr02	459814	G	A	Macma4_02_g00190:intron_variant:-:-:-:-:-
chr02	460356	C	T	Macma4_02_g00190:intron_variant:-:-:-:-:-
chr02	460471	G	A	Macma4_02_g00190:missense_variant:929:709:237:P/S:Cca/Tca
chr02	460493	G	A	Macma4_02_g00190:synonymous_variant:907:687:229:N:aaC/aaT
chr02	460981	G	A	Macma4_02_g00190:intron_variant:-:-:-:-:-
chr02	461178	C	T	Macma4_02_g00190:intron_variant:-:-:-:-:-
chr02	462104	G	A	Macma4_02_g00190:intron_variant:-:-:-:-:-
chr02	462485	A	G	Macma4_02_g00190:intron_variant:-:-:-:-:-
chr02	464368	G	A	Macma4_02_g00190:intron_variant:-:-:-:-:-
chr02	464608	C	T	Macma4_02_g00190:intron_variant:-:-:-:-:-
chr02	464845	T	C	Macma4_02_g00190:intron_variant:-:-:-:-:-
chr02	464926	C	T	Macma4_02_g00190:intron_variant:-:-:-:-:-
chr02	464978	T	G	Macma4_02_g00190:intron_variant:-:-:-:-:-
chr02	465081	A	T	Macma4_02_g00190:intron_variant:-:-:-:-:-
chr02	465179	A	G	Macma4_02_g00190:intron_variant:-:-:-:-:-
chr02	465226	G	T	Macma4_02_g00190:intron_variant:-:-:-:-:-
chr02	465631	G	A	Macma4_02_g00190:intron_variant:-:-:-:-:-
chr02	465728	C	CT	Macma4_02_g00190:intron_variant:-:-:-:-:-
chr02	466008	T	C	Macma4_02_g00190:intron_variant:-:-:-:-:-
chr02	466240	G	T	Macma4_02_g00190:intron_variant:-:-:-:-:-
chr02	466884	G	A	Macma4_02_g00190:intron_variant:-:-:-:-:-
chr02	467024	T	C	Macma4_02_g00190:intron_variant:-:-:-:-:-
chr02	467128	G	A	Macma4_02_g00190:intron_variant:-:-:-:-:-
chr02	467239	T	C	Macma4_02_g00190:intron_variant:-:-:-:-:-
chr02	467390	A	G	Macma4_02_g00190:intron_variant:-:-:-:-:-
chr02	467630	A	C	Macma4_02_g00190:intron_variant:-:-:-:-:-
chr02	468016	C	A	Macma4_02_g00190:synonymous_variant:424:204:68:S:tcG/tcT
chr02	468853	A	G	Macma4_02_g00190:intron_variant:-:-:-:-:-
chr02	470359	T	TA	Macma4_02_g00190:upstream_gene_variant:-:-:-:-:-
chr02	470631	C	G	Macma4_02_g00190:upstream_gene_variant:-:-:-:-:-
chr02	471011	G	A	Macma4_02_g00190:upstream_gene_variant:-:-:-:-:-
chr02	471041	A	T	Macma4_02_g00190:upstream_gene_variant:-:-:-:-:-
chr02	471119	T	A	Macma4_02_g00190:upstream_gene_variant:-:-:-:-:-
chr02	471485	T	C	Macma4_02_g00190:upstream_gene_variant:-:-:-:-:-
chr02	471614	G	A	Macma4_02_g00190:upstream_gene_variant:-:-:-:-:-
chr02	471827	T	TGAA	Macma4_02_g00190:upstream_gene_variant:-:-:-:-:-
chr02	471912	A	C	Macma4_02_g00190:upstream_gene_variant:-:-:-:-:-
chr02	472015	A	G	Macma4_02_g00190:upstream_gene_variant:-:-:-:-:-
chr02	473574	G	T	Macma4_02_g00190:upstream_gene_variant:-:-:-:-:-
chr02	473581	A	T	Macma4_02_g00190:upstream_gene_variant:-:-:-:-:-
chr02	473715	A	ACTCTCT	Macma4_02_g00190:upstream_gene_variant:-:-:-:-:-
chr02	473977	A	C	Macma4_02_g00190:upstream_gene_variant:-:-:-:-:-
chr02	473980	G	A	Macma4_02_g00190:upstream_gene_variant:-:-:-:-:-
chr02	474034	A	AAG	Macma4_02_g00190:upstream_gene_variant:-:-:-:-:-
chr02	474582	T	C
chr02	484242	G	A
chr02	484248	T	A
chr02	484254	C	G
chr02	484273	G	A
chr02	484320	AT	A
chr02	484397	G	T
chr02	484425	T	C
chr02	484548	T	G
chr02	484567	C	T
chr02	484578	C	A
chr02	484778	T	TC
chr02	485036	G	T
chr02	485066	G	A
chr02	485082	G	A
chr02	485092	A	G
chr02	485093	T	G
chr02	485095	T	C
chr02	485113	T	C
chr02	485128	T	A
chr02	485154	C	T
chr02	485155	C	G
chr02	485179	G	T
chr02	485187	C	T
chr02	485206	T	C
chr02	485210	A	G
chr02	485215	C	T
chr02	485216	A	G
chr02	485226	C	T
chr02	485247	A	G
chr02	485272	T	A
chr02	485289	C	T
chr02	485691	A	T
chr02	485701	A	T
chr02	485704	A	C
chr02	485719	A	G
chr02	485763	A	G
chr02	485842	T	A
chr02	487001	G	A
chr02	487005	A	G
chr02	487009	A	T
chr02	487030	T	C
chr02	487049	G	A
chr02	487062	T	C
chr02	487070	A	G
chr02	487095	G	A
chr02	487126	T	A
chr02	487271	G	T
chr02	487294	C	T
chr02	487296	T	C
chr02	487317	A	G
chr02	487389	T	C
chr02	487395	C	T
chr02	487433	A	C
chr02	487451	C	T
chr02	487492	G	A
chr02	487494	T	G
chr02	487521	A	G
chr02	487536	C	A
chr02	487539	C	T
chr02	487541	G	A
chr02	487547	C	T
chr02	487556	A	G
chr02	487566	T	C
chr02	487568	G	T
chr02	487586	C	T
chr02	487588	G	A
chr02	487598	C	G
chr02	496004	A	C
chr02	496013	T	C
chr02	496015	T	C
chr02	496017	A	G
chr02	496028	A	G
chr02	496041	G	A
chr02	496046	T	C
chr02	496056	C	A
chr02	496063	T	C
chr02	496070	C	A
chr02	496077	G	A
chr02	496087	A	G
chr02	496111	C	T
chr02	496134	G	A
chr02	496142	C	A
chr02	496192	A	G
chr02	496208	C	T
chr02	496210	C	G
chr02	496220	G	T
chr02	496242	C	T
chr02	496258	T	G
chr02	496270	A	G
chr02	496320	C	T
chr02	496321	T	C
chr02	496327	T	C
chr02	496339	C	G
chr02	496351	A	G
chr02	496352	C	T
chr02	496364	G	A
chr02	496366	G	A
chr02	496375	C	T
chr02	496381	C	T
chr02	496387	C	T
chr02	496404	G	A
chr02	496416	G	A
chr02	496428	C	T
chr02	496434	T	C
chr02	496471	C	T
chr02	496472	T	A
chr02	496481	A	C
chr02	496752	C	T
chr02	496806	G	A
chr02	496921	A	G
chr02	496931	A	C
chr02	496933	C	T
chr02	497061	T	G
chr02	497139	G	A
chr02	497141	T	C
chr02	497142	G	A
chr02	497171	G	A
chr02	497178	G	A
chr02	497213	G	A
chr02	497243	A	G
chr02	497245	T	C
chr02	497248	A	G
chr02	497252	G	A
chr02	497280	A	G
chr02	497281	T	C
chr02	497285	G	A
chr02	497305	A	G
chr02	497348	T	TTTA
chr02	497351	G	A
chr02	497461	A	T
chr02	497474	C	T
chr02	497578	A	T
[truncated: 961,256+ more rows]
