# Supplementary material
Source: Research Square preprint supplement (doi:10.21203/rs.3.rs-9199400/v1)
Supplement: Supplementary file 4 [file 9372c20e8cc5232377b539f2.xlsx]

## Sheet: PointMutations
Supplementary Table 2. The list of somatic mutations detected in this study
Sheet 1 lists point mutations, and Sheet 2 lists structural variations. Columns indicate chromosome (CHROM), genomic position (POS), reference allele (REF), alternative allele (ALT), inferred phylogenetic lineage in which the variant arose (Lineage), samples carrying the variant (SampleID), number of samples containing the variant (SampleNo), and gene annotation predicted by Ensembl Variant Effec…
CHROM	POS	REF	ALT	Lineage	SampleID	SampleNo	GeneAnnotation
chr01	51220	C	A	L2-1-2-1-1-1-1-1-1-1-1-1-1-1-1-1-1-1-1	CRI10	1	Macma4_01_g00020:downstream_gene_variant:-:-:-:-:-, Macma4_01_g00030:upstream_gene_variant:-:-:-:-:-
chr01	55477	T	G	L2-1-2-1-1-1-2-1-2	GTM03	1	Macma4_01_g00030:upstream_gene_variant:-:-:-:-:-
chr01	62736	G	C	L2-1-1-1-1-3-2-1	DOM01,DOM02	2
chr01	77242	T	TAAAC	L2-1-1-1-1-3-2-2-2-2-2-1-2	AUS06	1
chr01	79411	C	A	L1-2-2-2-2-2-3-1-2	CHN04	1
chr01	124395	G	A	L2-1-2-1-2	GTM01	1
chr01	124514	A	T	L2-1-2-1-1-1-1-1-1-1-2-1-2	PHL03	1
chr01	125444	A	AT	L1-2-1-2-2-2	PHL02,PHL05,PHL06	3
chr01	126827	A	G	L1-2-2-2-2-2-2-2-1	VNM10	1
chr01	132564	C	T	L2-1-1-1-1-1-2-2	ES-CN13,ES-CN14	2	Macma4_01_g00040:missense_variant:5150:4846:1616:E/K:Gaa/Aaa
chr01	138007	A	G	L2-1-2-1-1-2-1	ES-CN28	1	Macma4_01_g00040:intron_variant:-:-:-:-:-
chr01	139655	G	A	L2-1-1-1-1-3-2-2-2-2-2-2-3-1	AUS10	1	Macma4_01_g00040:synonymous_variant:4186:3882:1294:I:atC/atT
chr01	144754	G	A	L2-1-2-1-1-1-1-1-1-1-1-1	ES-CN25,ES-CN26,ES-CN31,ES-CN32,COL07,CRI03,CRI04,CRI05,CRI09,CRI10,ECU02,ECU03,GLP01,KOR03,KOR04,NIC02	16	Macma4_01_g00040:synonymous_variant:1510:1206:402:L:ctC/ctT
chr01	146456	C	A	L2-1-1-1-1-1-2-4-2-2	ES-CN11,ES-CN12	2	Macma4_01_g00040:intron_variant:-:-:-:-:-
chr01	146984	C	A	L2-1-2-1-1-1-1-1-1-1-1-1-1-2	GLP01	1	Macma4_01_g00040:intron_variant:-:-:-:-:-
chr01	147984	G	A	L1-2-1-2-1	PHL10	1	Macma4_01_g00040:intron_variant:-:-:-:-:-
chr01	150021	C	A	L2-1-1-1-1-1-2-3-1	ES-CN03,ES-CN04	2	Macma4_01_g00040:upstream_gene_variant:-:-:-:-:-
chr01	153159	G	A	L2-1-1-1-1-1-2-3-2-1	ES-CN09	1	Macma4_01_g00040:upstream_gene_variant:-:-:-:-:-, Macma4_01_g00050:upstream_gene_variant:-:-:-:-:-
chr01	155280	C	T	L1-2-1-2-2-1	VNM09	1	Macma4_01_g00050:upstream_gene_variant:-:-:-:-:-
chr01	155733	C	A	L2-1-2-1-1-1-1-1-1-1-1-1-2	KOR03,KOR04	2	Macma4_01_g00050:5_prime_UTR_variant:103:-:-:-:-
chr01	156143	G	T	L2-1-1-1-1-3-2-2-1-2-1	NIC01	1	Macma4_01_g00050:intron_variant:-:-:-:-:-
chr01	160722	G	A	L1-2-1-2-2-2-1	PHL05	1	Macma4_01_g00050:missense_variant:1574:1187:396:R/H:cGt/cAt
chr01	163360	G	A	L2-1-1-1-1-3-2-2-2-2-3-2-2-2-2-1	CMR01	1	Macma4_01_g00050:intron_variant:-:-:-:-:-, Macma4_01_g00060:upstream_gene_variant:-:-:-:-:-
chr01	166356	C	A	L2-1-1-1-1-3-2-2-2-2-3-1	COL05	1	Macma4_01_g00050:downstream_gene_variant:-:-:-:-:-, Macma4_01_g00060:upstream_gene_variant:-:-:-:-:-
chr01	173963	C	G	L1-2-1-2-2-2-2-1	PHL06	1	Macma4_01_g00060:downstream_gene_variant:-:-:-:-:-, Macma4_01_g00070:upstream_gene_variant:-:-:-:-:-, Macma4_01_g00080:downstream_gene_variant:-:-:-:-:-
chr01	175921	C	T	L2-1-2-1-1-1-1-2	MEX02	1	Macma4_01_g00070:upstream_gene_variant:-:-:-:-:-, Macma4_01_g00080:synonymous_variant:1561:1086:362:Q:caG/caA
chr01	177116	A	C	L2-1-2-1-1-1-1-1-1-1-1-1-2	KOR03,KOR04	2	Macma4_01_g00070:upstream_gene_variant:-:-:-:-:-, Macma4_01_g00080:missense_variant:1305:830:277:L/R:cTt/cGt, Macma4_01_g00090:upstream_gene_variant:-:-:-:-:-
chr01	177625	G	A	L2-1-2-1-1-1-1-1-1-1-1-2-2-1-1	GLP03	1	Macma4_01_g00070:upstream_gene_variant:-:-:-:-:-, Macma4_01_g00080:intron_variant:-:-:-:-:-, Macma4_01_g00090:upstream_gene_variant:-:-:-:-:-
chr01	196916	C	A	L1-2-2-2-1	VNM04	1	Macma4_01_g00100:downstream_gene_variant:-:-:-:-:-, Macma4_01_g00110:upstream_gene_variant:-:-:-:-:-
chr01	199184	G	A	L1-2-2	CHN01,CHN02,CHN03,CHN04,CHN05,VNM10,TH-KOR01,TH-KOR02,TH-KOR03,TH-KOR04,TH-KOR05,TH-KOR06,TH-KOR07,TH-KOR08,PHL01,VNM01,VNM03,VNM02,VNM04,VNM05,VNM06,VNM07	22	Macma4_01_g00100:downstream_gene_variant:-:-:-:-:-, Macma4_01_g00110:upstream_gene_variant:-:-:-:-:-
chr01	204729	G	A	L2-1-2-1-1-1-1-1-1-2-1	PAN01	1
chr01	215998	C	T	L2-1-1-1-1-1-2-4-2-2	ES-CN11,ES-CN12	2	Macma4_01_g00120:downstream_gene_variant:-:-:-:-:-, Macma4_01_g00130:upstream_gene_variant:-:-:-:-:-
chr01	218278	G	T	L2-1-2-1-1-1-1-1-1-1-1-1-1-1-1-3	ECU02,ECU03	2	Macma4_01_g00120:downstream_gene_variant:-:-:-:-:-, Macma4_01_g00130:missense_variant:860:694:232:G/C:Ggc/Tgc, Macma4_01_g00140:downstream_gene_variant:-:-:-:-:-
chr01	236633	T	G	L2-1-1-1-1-3-2-2-2-2-3-2-2-2-1	CMR02	1	Macma4_01_g00150:upstream_gene_variant:-:-:-:-:-, Macma4_01_g00160:intron_variant:-:-:-:-:-
chr01	239359	T	C	L2-1-2-1-1-1-1-1-1-1-3	HND01	1	Macma4_01_g00160:missense_variant:1187:1073:358:I/T:aTt/aCt
chr01	241091	C	CG	L2-1-1-1-1-1-2-5-1	ES-CN01	1	Macma4_01_g00160:frameshift_variant:1620-1621:1506-1507:502-503:-/X:-/G
chr01	254299	G	T	L2-2-2-1-1	UKN02	1	Macma4_01_g00170:downstream_gene_variant:-:-:-:-:-, Macma4_01_g00180:missense_variant:1979:1899:633:F/L:ttC/ttA
chr01	270318	A	T	L2-1-1-1-1-2-2-2	GLP02	1	Macma4_01_g00190:3_prime_UTR_variant:1223:-:-:-:-, Macma4_01_g00200:upstream_gene_variant:-:-:-:-:-, Macma4_01_g00210:upstream_gene_variant:-:-:-:-:-
chr01	277041	C	G	L2-1-2-1-1-1-1-1-1-1-1-1-1-1-2	NIC02	1	Macma4_01_g00200:downstream_gene_variant:-:-:-:-:-, Macma4_01_g00210:intron_variant:-:-:-:-:-
chr01	277189	A	G	L2-1-2-1-1-1-1-1-1-1-1-2-1-3	HND02	1	Macma4_01_g00200:downstream_gene_variant:-:-:-:-:-, Macma4_01_g00210:intron_variant:-:-:-:-:-
chr01	278049	A	G	L2-1-2-1-1-1-1-1-1-1-1-1-1-1-1-1-2	COL07	1	Macma4_01_g00200:downstream_gene_variant:-:-:-:-:-, Macma4_01_g00210:intron_variant:-:-:-:-:-
chr01	285877	GC	G	L2-1-1-1-1-3-2-2-2-2-3-1	COL05	1	Macma4_01_g00210:downstream_gene_variant:-:-:-:-:-, Macma4_01_g00220:intron_variant:-:-:-:-:-
chr01	288887	A	G	L2-1-2-1-1-1-1-1-1-2-2	PHL09	1	Macma4_01_g00220:intron_variant:-:-:-:-:-, Macma4_01_g00230:downstream_gene_variant:-:-:-:-:-
chr01	291403	C	A	L2-2-2-2-1	MEX01	1	Macma4_01_g00220:downstream_gene_variant:-:-:-:-:-, Macma4_01_g00230:3_prime_UTR_variant:330:-:-:-:-, Macma4_01_g00240:downstream_gene_variant:-:-:-:-:-
chr01	316738	G	A	L2-2-1-1-1-3	COL01	1	Macma4_01_g00250:upstream_gene_variant:-:-:-:-:-, Macma4_01_g00260:intron_variant:-:-:-:-:-, Macma4_01_g00280:upstream_gene_variant:-:-:-:-:-
chr01	317569	A	T	L2-1-1-1-1-3-2-2-1-1-1	ECU01	1	Macma4_01_g00250:upstream_gene_variant:-:-:-:-:-, Macma4_01_g00260:intron_variant:-:-:-:-:-, Macma4_01_g00280:upstream_gene_variant:-:-:-:-:-
chr01	334647	A	G	L2-2-2-1-2	UKN01	1	Macma4_01_g00290:downstream_gene_variant:-:-:-:-:-, Macma4_01_g00300:upstream_gene_variant:-:-:-:-:-, Macma4_01_g00310:downstream_gene_variant:-:-:-:-:-
chr01	336343	G	A	L1-2-2-2-2-2-2-1-2	VNM03,VNM02	2	Macma4_01_g00300:upstream_gene_variant:-:-:-:-:-, Macma4_01_g00310:downstream_gene_variant:-:-:-:-:-, Macma4_01_g00320:downstream_gene_variant:-:-:-:-:-
chr01	351274	A	G	L2-1-1-1-1-2-2-2	GLP02	1	Macma4_01_g00330:5_prime_UTR_variant:56:-:-:-:-, Macma4_01_g00340:upstream_gene_variant:-:-:-:-:-
chr01	353543	T	A	L2-1-2-2-1-1-2	PER04	1	Macma4_01_g00330:upstream_gene_variant:-:-:-:-:-, Macma4_01_g00340:upstream_gene_variant:-:-:-:-:-
chr01	356059	G	T	L2-1-2-1-1-1-1-1-1-1-1-1-1	ES-CN25,ES-CN26,ES-CN31,ES-CN32,COL07,CRI03,CRI04,CRI05,CRI09,CRI10,ECU02,ECU03,GLP01,NIC02	14	Macma4_01_g00330:upstream_gene_variant:-:-:-:-:-, Macma4_01_g00340:downstream_gene_variant:-:-:-:-:-, Macma4_01_g00350:downstream_gene_variant:-:-:-:-:-, Macma4_01_g00360:upstream_gene_variant:-:-:-:-:-
chr01	358005	G	A	L2-1-2-1-1-1-1-1-1-1-1-2-1-1-1-2	ECU07	1	Macma4_01_g00340:downstream_gene_variant:-:-:-:-:-, Macma4_01_g00350:downstream_gene_variant:-:-:-:-:-, Macma4_01_g00360:upstream_gene_variant:-:-:-:-:-
chr01	361917	G	T	L1-2-1-2-1	PHL10	1	Macma4_01_g00350:upstream_gene_variant:-:-:-:-:-, Macma4_01_g00360:intron_variant:-:-:-:-:-
chr01	364584	A	T	L2-1-2-1-1-1-1-1-1-1-1-2-1-1-1	ECU07,ECU09	2	Macma4_01_g00360:intron_variant:-:-:-:-:-
chr01	366393	A	AT	L2-1-2-1-1-1-1-1-1-1-1-2-2-1	ES-CN19,GLP03	2	Macma4_01_g00360:intron_variant:-:-:-:-:-, Macma4_01_g00370:downstream_gene_variant:-:-:-:-:-
chr01	369226	T	A	L2-1-1-1-1-3-2-1	DOM01,DOM02	2	Macma4_01_g00360:intron_variant:-:-:-:-:-, Macma4_01_g00370:downstream_gene_variant:-:-:-:-:-
chr01	377475	A	G	L2-1-1-1-1-2-2-1	COL03	1	Macma4_01_g00370:intron_variant:-:-:-:-:-, Macma4_01_g00380:upstream_gene_variant:-:-:-:-:-
chr01	377476	C	A	L2-1-1-1-1-2-2-1	COL03	1	Macma4_01_g00370:intron_variant:-:-:-:-:-, Macma4_01_g00380:upstream_gene_variant:-:-:-:-:-
chr01	380739	C	T	L2-1-2-1-1-1-1-1-1-1-1-1-1-1-1-1-2	COL07	1	Macma4_01_g00370:upstream_gene_variant:-:-:-:-:-, Macma4_01_g00380:5_prime_UTR_variant:239:-:-:-:-
chr01	383316	C	A	L2-1-1-1-1-1-2-3-1	ES-CN03,ES-CN04	2	Macma4_01_g00380:intron_variant:-:-:-:-:-, Macma4_01_g00390:downstream_gene_variant:-:-:-:-:-
chr01	386288	C	A	L2-1-1-1-1-3-2-2-1-2-1	NIC01	1	Macma4_01_g00380:missense_variant:2899:2312:771:S/Y:tCt/tAt, Macma4_01_g00390:downstream_gene_variant:-:-:-:-:-, Macma4_01_g00400:downstream_gene_variant:-:-:-:-:-, Macma4_01_g00410:downstream_gene_variant:-:-:-:-:-
chr01	386519	G	A	L2-1-1-1-1-3-2-2-1-2-1	NIC01	1	Macma4_01_g00380:downstream_gene_variant:-:-:-:-:-, Macma4_01_g00390:downstream_gene_variant:-:-:-:-:-, Macma4_01_g00400:downstream_gene_variant:-:-:-:-:-, Macma4_01_g00410:downstream_gene_variant:-:-:-:-:-
chr01	395447	TCGCAGCCCAGCTCCGGGGGGTGCGGCCGTAGCCGC	T	L1-2-2-2-2-2-3-2-2-2-1	TH-KOR06,TH-KOR08	2	Macma4_01_g00410:upstream_gene_variant:-:-:-:-:-, Macma4_01_g00420:downstream_gene_variant:-:-:-:-:-, Macma4_01_g00430:frameshift_variant:198-232:198-232:66-78:RRLRPHPPELGCE/RX:cgGCGGCTACGGCCGCACCCCCCGGAGCTGGGCTGCGag/cgag, Macma4_01_g00440:downstream_gene_variant:-:-:-:-:-
chr01	397500	T	C	L1-2-2-2-2-2-2-1	VNM01,VNM03,VNM02	3	Macma4_01_g00420:downstream_gene_variant:-:-:-:-:-, Macma4_01_g00430:upstream_gene_variant:-:-:-:-:-, Macma4_01_g00440:intron_variant:-:-:-:-:-
chr01	400339	A	G	L2-2-2-2-1	MEX01	1	Macma4_01_g00430:upstream_gene_variant:-:-:-:-:-, Macma4_01_g00440:intron_variant:-:-:-:-:-
chr01	401270	G	T	L2-1-1-1-1-3-2-2-1-2-1	NIC01	1	Macma4_01_g00440:missense_variant:217:217:73:P/T:Ccc/Acc, Macma4_01_g00450:downstream_gene_variant:-:-:-:-:-
chr01	402683	C	T	L1-2-2-2-1	VNM04	1	Macma4_01_g00440:upstream_gene_variant:-:-:-:-:-, Macma4_01_g00450:downstream_gene_variant:-:-:-:-:-
chr01	409106	G	A	L2-1-2-1-1-1-1-1-1-1-1-2-1-1	ECU06,ECU07,ECU09	3	Macma4_01_g00450:upstream_gene_variant:-:-:-:-:-, Macma4_01_g00460:downstream_gene_variant:-:-:-:-:-
chr01	422213	G	A	L1-2-2-2-2-2-3-2-1-1	VNM05	1	Macma4_01_g00470:missense_variant:900:818:273:R/Q:cGa/cAa, Macma4_01_g00480:upstream_gene_variant:-:-:-:-:-
chr01	424622	C	T	L1-2-1-2-1	PHL10	1	Macma4_01_g00470:downstream_gene_variant:-:-:-:-:-, Macma4_01_g00480:synonymous_variant:949:859:287:L:Ctg/Ttg
chr01	427377	C	G	L2-1-1-1-1-3-2-2-2-2-3-2-2-2	CMR01,CMR02,GHA03	3	Macma4_01_g00470:downstream_gene_variant:-:-:-:-:-, Macma4_01_g00480:downstream_gene_variant:-:-:-:-:-
chr01	432246	T	C	L1-2-2-2-2-1	VNM06	1	Macma4_01_g00490:downstream_gene_variant:-:-:-:-:-
chr01	432827	C	T	L2-1-1-1-1-2-2-1	COL03	1	Macma4_01_g00490:downstream_gene_variant:-:-:-:-:-
chr01	432843	G	T	L2-1-1-1-1-2-2-1	COL03	1	Macma4_01_g00490:downstream_gene_variant:-:-:-:-:-
chr01	432844	C	G	L2-1-1-1-1-2-2-1	COL03	1	Macma4_01_g00490:downstream_gene_variant:-:-:-:-:-
chr01	433659	G	T	L2-1-1-1-1-2-2-1	COL03	1	Macma4_01_g00490:synonymous_variant:621:387:129:G:ggC/ggA
chr01	433660	C	T	L2-1-1-1-1-2-2-1	COL03	1	Macma4_01_g00490:missense_variant:620:386:129:G/D:gGc/gAc
chr01	434726	G	T	L1-1	KOR06	1	Macma4_01_g00490:upstream_gene_variant:-:-:-:-:-
chr01	434765	T	C	L1-2-2-2-2-2-2-2-2-1	CHN05	1	Macma4_01_g00490:upstream_gene_variant:-:-:-:-:-
chr01	441095	G	A	L2-1-2-1-1-1-1-1-1-1-1-1-2-1	KOR04	1	Macma4_01_g00500:missense_variant:143:29:10:G/E:gGg/gAg
chr01	441470	G	A	L2-2-1-1-1-3	COL01	1	Macma4_01_g00500:intron_variant:-:-:-:-:-
chr01	444960	G	A	L2-2-1-1-2	CRI06	1	Macma4_01_g00500:intron_variant:-:-:-:-:-
chr01	447698	T	C	L2-1-1-1-1-1-2-3-1	ES-CN03,ES-CN04	2	Macma4_01_g00500:intron_variant:-:-:-:-:-, Macma4_01_g00510:upstream_gene_variant:-:-:-:-:-, Macma4_01_g00520:downstream_gene_variant:-:-:-:-:-
chr01	449824	C	T	L2-1-2-1-1-1-1-1-1-1-1-2-1-1	ECU06,ECU07,ECU09	3	Macma4_01_g00500:synonymous_variant:675:561:187:N:aaC/aaT, Macma4_01_g00510:upstream_gene_variant:-:-:-:-:-, Macma4_01_g00520:downstream_gene_variant:-:-:-:-:-
chr01	454112	G	A	L2-1-1-1-1-2-1	ES-CN20	1	Macma4_01_g00500:downstream_gene_variant:-:-:-:-:-, Macma4_01_g00510:downstream_gene_variant:-:-:-:-:-, Macma4_01_g00520:synonymous_variant:264:264:88:F:ttC/ttT, Macma4_01_g00530:downstream_gene_variant:-:-:-:-:-
chr01	458843	C	A	L1-2-2-2-2-2-3-2-1-2	CHN02	1	Macma4_01_g00520:upstream_gene_variant:-:-:-:-:-, Macma4_01_g00530:stop_gained:301:163:55:E/*:Gag/Tag, Macma4_01_g00540:downstream_gene_variant:-:-:-:-:-
chr01	462442	A	G	L2-1-2-1-1-1-2-1-2	GTM03	1	Macma4_01_g00530:upstream_gene_variant:-:-:-:-:-, Macma4_01_g00540:intron_variant:-:-:-:-:-
chr01	463063	C	G	L2-1-2-1-1-1-1-1-1-1-2-1-2	PHL03	1	Macma4_01_g00530:upstream_gene_variant:-:-:-:-:-, Macma4_01_g00540:intron_variant:-:-:-:-:-
chr01	464733	A	C	L1-2-2-2-1	VNM04	1	Macma4_01_g00540:upstream_gene_variant:-:-:-:-:-
chr01	472917	C	T	L2-1-1-1-1-1-2-1	ES-CN16	1	Macma4_01_g00550:missense_variant:873:812:271:A/V:gCt/gTt
chr01	476887	A	T	L1-2-2-2-2-2-3-2-2-2-2-2-2	TH-KOR05	1	Macma4_01_g00550:downstream_gene_variant:-:-:-:-:-, Macma4_01_g00560:upstream_gene_variant:-:-:-:-:-
chr01	479243	G	A	L2-1-1-1-1-1-2-5-2-3-2-1	ES-CN05	1	Macma4_01_g00550:downstream_gene_variant:-:-:-:-:-, Macma4_01_g00560:splice_donor_variant:-:-:-:-:-
chr01	488550	G	A	L2-2-1-1	COL01,COL06,CRI06,ECU04,PER03	5	Macma4_01_g00560:intron_variant:-:-:-:-:-
chr01	491728	T	A	L2-1-1-1-1-3-2-2-2-2-3-2-2-2-2-2	GHA03	1	Macma4_01_g00560:intron_variant:-:-:-:-:-
chr01	498817	C	A	L1-2-1-2-1	PHL10	1	Macma4_01_g00560:downstream_gene_variant:-:-:-:-:-, Macma4_01_g00570:intron_variant:-:-:-:-:-, Macma4_01_g00580:downstream_gene_variant:-:-:-:-:-
chr01	506431	C	T	L2-1-1-1-2-2-2	ECU05	1	Macma4_01_g00570:upstream_gene_variant:-:-:-:-:-, Macma4_01_g00580:5_prime_UTR_variant:338:-:-:-:-, Macma4_01_g00590:upstream_gene_variant:-:-:-:-:-
chr01	510872	C	G	L2-1-2-2-1-1-1	PER05	1	Macma4_01_g00580:upstream_gene_variant:-:-:-:-:-, Macma4_01_g00590:missense_variant:1085:812:271:P/R:cCg/cGg, Macma4_01_g00600:downstream_gene_variant:-:-:-:-:-
chr01	515881	T	C	L2-1-2-1-1-1-1-1-1-1-1-1-1-1-1-1-1-2-1	CRI04	1	Macma4_01_g00590:downstream_gene_variant:-:-:-:-:-, Macma4_01_g00600:missense_variant:919:694:232:S/G:Agt/Ggt
chr01	518192	C	T	L2-1-2-1-1-1-3-2	GHA01	1	Macma4_01_g00600:missense_variant,splice_region_variant:631:406:136:E/K:Gag/Aag
chr01	520638	C	G	L2-1-2-1-1-1-1-1-1-1-1-1-2	KOR03,KOR04	2	Macma4_01_g00600:intron_variant:-:-:-:-:-
chr01	526021	C	A	L2-1-2-1-2	GTM01	1	Macma4_01_g00600:upstream_gene_variant:-:-:-:-:-, Macma4_01_g00610:downstream_gene_variant:-:-:-:-:-
chr01	527518	T	C	L1-2-2-2-2-2-3-2-2-2-2-2-1	TH-KOR03	1	Macma4_01_g00600:upstream_gene_variant:-:-:-:-:-, Macma4_01_g00610:downstream_gene_variant:-:-:-:-:-, Macma4_01_g00620:upstream_gene_variant:-:-:-:-:-
chr01	565715	A	G	L2-1-2-1-1-1-1-1-1-1-1-1-1-1-1-2-2-2	CRI05	1	Macma4_01_g00640:intron_variant:-:-:-:-:-
chr01	573237	A	T	L2-1-2-1-1-1-1-1-1-1-1-2-2-2	COL04	1	Macma4_01_g00640:synonymous_variant:1838:1671:557:T:acA/acT
chr01	579240	C	T	L2-1-2-1-1-1-1-1-1-1-1-2-2-2	COL04	1	Macma4_01_g00640:downstream_gene_variant:-:-:-:-:-, Macma4_01_g00650:synonymous_variant:2832:2133:711:L:ctG/ctA
chr01	579492	A	G	L2-1-2-1-1-1-1-1-1-1-1-1-1-1-1-2-1-1	ES-CN26	1	Macma4_01_g00640:downstream_gene_variant:-:-:-:-:-, Macma4_01_g00650:synonymous_variant:2580:1881:627:C:tgT/tgC
chr01	585172	C	T	L2-1-2-1-1-1-1-1-1-1-1-1-2	KOR03,KOR04	2	Macma4_01_g00650:upstream_gene_variant:-:-:-:-:-, Macma4_01_g00660:upstream_gene_variant:-:-:-:-:-
chr01	585658	C	G	L2-1-2-3	DOM04	1	Macma4_01_g00650:upstream_gene_variant:-:-:-:-:-, Macma4_01_g00660:missense_variant:119:56:19:P/R:cCt/cGt
chr01	594749	T	C	L1-2-2-2-2-2-2-1	VNM01,VNM03,VNM02	3	Macma4_01_g00660:downstream_gene_variant:-:-:-:-:-, Macma4_01_g00670:intron_variant:-:-:-:-:-
chr01	600541	C	T	L1-1	KOR06	1	Macma4_01_g00670:intron_variant:-:-:-:-:-
chr01	602546	G	A	L2-1-2-1-1-1-2-1-2	GTM03	1	Macma4_01_g00670:intron_variant:-:-:-:-:-, Macma4_01_g00680:downstream_gene_variant:-:-:-:-:-
chr01	605776	C	A	L2-1-1-1-1-3-2-2-2-2-3-2-1-2	KOR02,KOR05	2	Macma4_01_g00670:intron_variant:-:-:-:-:-, Macma4_01_g00680:downstream_gene_variant:-:-:-:-:-, Macma4_01_g00690:upstream_gene_variant:-:-:-:-:-, Macma4_01_g00700:upstream_gene_variant:-:-:-:-:-
chr01	607536	CAT	C	L1-2-2-2-2-2-3-2-2-1	TH-KOR01,TH-KOR02,TH-KOR04	3	Macma4_01_g00670:downstream_gene_variant:-:-:-:-:-, Macma4_01_g00680:intron_variant:-:-:-:-:-, Macma4_01_g00690:upstream_gene_variant:-:-:-:-:-, Macma4_01_g00700:upstream_gene_variant:-:-:-:-:-
chr01	608618	C	G	L2-1-2-1-1-1-1-1-1-1-2-1-2	PHL03	1	Macma4_01_g00670:downstream_gene_variant:-:-:-:-:-, Macma4_01_g00680:upstream_gene_variant:-:-:-:-:-, Macma4_01_g00690:5_prime_UTR_variant:732:-:-:-:-, Macma4_01_g00700:upstream_gene_variant:-:-:-:-:-
chr01	618460	C	T	L1-2-1-1	KOR01	1	Macma4_01_g00710:downstream_gene_variant:-:-:-:-:-, Macma4_01_g00720:missense_variant:259:259:87:D/N:Gat/Aat, Macma4_01_g00730:upstream_gene_variant:-:-:-:-:-
chr01	620564	G	T	L2-1-2-1-1-1-1-1-1-1-1-1-1	ES-CN25,ES-CN26,ES-CN31,ES-CN32,COL07,CRI03,CRI04,CRI05,CRI09,CRI10,ECU02,ECU03,GLP01,NIC02	14	Macma4_01_g00720:upstream_gene_variant:-:-:-:-:-, Macma4_01_g00730:intron_variant:-:-:-:-:-
chr01	621717	T	A	L2-1-2-1-1-2-1	ES-CN28	1	Macma4_01_g00720:upstream_gene_variant:-:-:-:-:-, Macma4_01_g00730:intron_variant:-:-:-:-:-
chr01	637074	G	A	L2-1-1-1-1-3-2-2-2-2-2-2-3-2	AUS04,AUS07	2	Macma4_01_g00740:upstream_gene_variant:-:-:-:-:-, Macma4_01_g00750:intron_variant:-:-:-:-:-, Macma4_01_g00760:downstream_gene_variant:-:-:-:-:-, Macma4_01_g00770:downstream_gene_variant:-:-:-:-:-
chr01	645664	C	A	L1-2-2-2-2-2-3-2-2-1-1	TH-KOR01	1	Macma4_01_g00760:upstream_gene_variant:-:-:-:-:-, Macma4_01_g00770:upstream_gene_variant:-:-:-:-:-, Macma4_01_g00780:downstream_gene_variant:-:-:-:-:-, Macma4_01_g00790:upstream_gene_variant:-:-:-:-:-, Macma4_01_g00800:downstream_gene_variant:-:-:-:-:-
chr01	646047	A	T	L2-1-2-1-1-1-1-1-1-1-1-2-1-2	GHA04	1	Macma4_01_g00770:upstream_gene_variant:-:-:-:-:-, Macma4_01_g00780:splice_donor_region_variant,intron_variant:-:-:-:-:-, Macma4_01_g00790:upstream_gene_variant:-:-:-:-:-, Macma4_01_g00800:downstream_gene_variant:-:-:-:-:-
chr01	653729	A	C	L2-1-2-1-1-1-1-1-1-1-1-1-2	KOR03,KOR04	2	Macma4_01_g00790:downstream_gene_variant:-:-:-:-:-, Macma4_01_g00800:intron_variant:-:-:-:-:-, Macma4_01_g00810:downstream_gene_variant:-:-:-:-:-
chr01	656613	C	T	L2-1-1-1-1-1-2-3-1	ES-CN03,ES-CN04	2	Macma4_01_g00800:upstream_gene_variant:-:-:-:-:-, Macma4_01_g00810:upstream_gene_variant:-:-:-:-:-, Macma4_01_g00820:upstream_gene_variant:-:-:-:-:-
chr01	656652	G	C	L1-1	KOR06	1	Macma4_01_g00800:upstream_gene_variant:-:-:-:-:-, Macma4_01_g00810:upstream_gene_variant:-:-:-:-:-, Macma4_01_g00820:upstream_gene_variant:-:-:-:-:-
chr01	676587	G	A	L1-2-2-2-2-2-2-1	VNM01,VNM03,VNM02	3	Macma4_01_g00840:downstream_gene_variant:-:-:-:-:-, Macma4_01_g00850:upstream_gene_variant:-:-:-:-:-, Macma4_01_g00860:missense_variant:292:292:98:P/S:Cct/Tct, Macma4_01_g00870:downstream_gene_variant:-:-:-:-:-
chr01	677735	T	C	L1-2-1-2-1	PHL10	1	Macma4_01_g00840:downstream_gene_variant:-:-:-:-:-, Macma4_01_g00850:upstream_gene_variant:-:-:-:-:-, Macma4_01_g00860:intron_variant:-:-:-:-:-, Macma4_01_g00870:downstream_gene_variant:-:-:-:-:-
chr01	684170	T	C	L2-1-1-1-1-1-2-5-2-1	ES-CN06	1	Macma4_01_g00880:intron_variant:-:-:-:-:-
chr01	684265	C	T	L2-1-1-1-1-3-2-2-1-2-1	NIC01	1	Macma4_01_g00880:intron_variant:-:-:-:-:-
chr01	686623	T	A	L1-2-2-2-2-2-3-2-2-1-2-1	TH-KOR02	1	Macma4_01_g00880:upstream_gene_variant:-:-:-:-:-, Macma4_01_g00900:downstream_gene_variant:-:-:-:-:-
chr01	689008	C	A	L2-1-2-1-1-1-1-2	MEX02	1	Macma4_01_g00880:upstream_gene_variant:-:-:-:-:-, Macma4_01_g00890:downstream_gene_variant:-:-:-:-:-, Macma4_01_g00900:downstream_gene_variant:-:-:-:-:-
chr01	700747	C	A	L1-2-2-2-1	VNM04	1	Macma4_01_g00910:downstream_gene_variant:-:-:-:-:-, Macma4_01_g00920:intron_variant:-:-:-:-:-
chr01	703477	G	A	L2-1-2-1-1-1-1-1-1-1-1-1-1	ES-CN25,ES-CN26,ES-CN31,ES-CN32,COL07,CRI03,CRI04,CRI05,CRI09,CRI10,ECU02,ECU03,GLP01,NIC02	14	Macma4_01_g00920:intron_variant:-:-:-:-:-, Macma4_01_g00930:upstream_gene_variant:-:-:-:-:-
chr01	705444	TA	T	L1-2-2-2-1	VNM04	1	Macma4_01_g00920:upstream_gene_variant:-:-:-:-:-, Macma4_01_g00930:upstream_gene_variant:-:-:-:-:-
chr01	708779	T	G	L2-1-1-1-1-3-2-2-2-2-3-2-1-2	KOR02,KOR05	2	Macma4_01_g00930:intron_variant:-:-:-:-:-
chr01	716737	C	T	L1-2-2-2-2-2-3-1-1	CHN03	1	Macma4_01_g00940:upstream_gene_variant:-:-:-:-:-, Macma4_01_g00950:downstream_gene_variant:-:-:-:-:-
chr01	722130	C	A	L1-2-2-2-2-2-2-2-1	VNM10	1	Macma4_01_g00950:intron_variant:-:-:-:-:-, Macma4_01_g00960:downstream_gene_variant:-:-:-:-:-
chr01	723709	C	T	L2-1-1-1-1-3-2-2-1-2-2-2	ES-CN22	1	Macma4_01_g00950:intron_variant:-:-:-:-:-, Macma4_01_g00960:downstream_gene_variant:-:-:-:-:-
chr01	724318	C	A	L2-1-2-1-1-1-1-1-1-1-1-1-1-1-1-1-1-1-2	CRI09	1	Macma4_01_g00950:intron_variant:-:-:-:-:-, Macma4_01_g00960:downstream_gene_variant:-:-:-:-:-
chr01	725375	C	T	L1-2-1-2-1	PHL10	1	Macma4_01_g00950:missense_variant:265:238:80:E/K:Gag/Aag, Macma4_01_g00960:downstream_gene_variant:-:-:-:-:-
chr01	729669	G	A	L1-2-2-2-1	VNM04	1	Macma4_01_g00950:upstream_gene_variant:-:-:-:-:-, Macma4_01_g00960:missense_variant:1287:436:146:P/S:Cca/Tca, Macma4_01_g00970:upstream_gene_variant:-:-:-:-:-, Macma4_01_g00980:upstream_gene_variant:-:-:-:-:-
chr01	729750	C	A	L1-2-2-2-2-2-2-1-1	VNM01	1	Macma4_01_g00950:upstream_gene_variant:-:-:-:-:-, Macma4_01_g00960:stop_gained:1206:355:119:G/*:Gga/Tga, Macma4_01_g00970:upstream_gene_variant:-:-:-:-:-, Macma4_01_g00980:upstream_gene_variant:-:-:-:-:-
chr01	732328	C	T	L2-1-2-1-1-1-1-1-1-1-1-1-1-1-1-3-1	ECU03	1	Macma4_01_g00960:upstream_gene_variant:-:-:-:-:-, Macma4_01_g00970:upstream_gene_variant:-:-:-:-:-, Macma4_01_g00980:upstream_gene_variant:-:-:-:-:-, Macma4_01_g00990:downstream_gene_variant:-:-:-:-:-
chr01	736288	T	C	L2-1-2-1-1-1-1-1-1-1-1-1-1-1-1-2-1-2	ES-CN25	1	Macma4_01_g00970:downstream_gene_variant:-:-:-:-:-, Macma4_01_g00980:downstream_gene_variant:-:-:-:-:-, Macma4_01_g00990:intron_variant:-:-:-:-:-, Macma4_01_g01000:downstream_gene_variant:-:-:-:-:-
chr01	736501	G	A	L2-1-1-1-1-1-2-2-2	ES-CN14	1	Macma4_01_g00970:downstream_gene_variant:-:-:-:-:-, Macma4_01_g00980:downstream_gene_variant:-:-:-:-:-, Macma4_01_g00990:intron_variant:-:-:-:-:-, Macma4_01_g01000:downstream_gene_variant:-:-:-:-:-
chr01	741390	T	A	L2-1-2-1-1-1-1-1-1-1-1-1-2	KOR03,KOR04	2	Macma4_01_g00990:upstream_gene_variant:-:-:-:-:-, Macma4_01_g01000:intron_variant:-:-:-:-:-
chr01	741804	C	T	L2-1-2-1-1-1-1-1-2	CRI02,CRI08	2	Macma4_01_g00990:upstream_gene_variant:-:-:-:-:-, Macma4_01_g01000:intron_variant:-:-:-:-:-
chr01	742139	G	A	L2-1-2-1-1-1-1-1-1-2-1	PAN01	1	Macma4_01_g00990:upstream_gene_variant:-:-:-:-:-, Macma4_01_g01000:intron_variant:-:-:-:-:-
chr01	744898	G	A	L2-1-2-1-1-1-1-1-1-1-1-2-1	ECU06,ECU07,ECU09,GHA04,HND02	5	Macma4_01_g01000:intron_variant:-:-:-:-:-
chr01	750280	G	A	L2-1-2-1-1-1-1-1-1-1-1-2-2-1	ES-CN19,GLP03	2	Macma4_01_g01000:intron_variant:-:-:-:-:-
chr01	750352	T	A	L2-1-2-1-1-1-2-1-2	GTM03	1	Macma4_01_g01000:intron_variant:-:-:-:-:-
chr01	750353	A	T	L2-1-2-1-1-1-2-1-2	GTM03	1	Macma4_01_g01000:intron_variant:-:-:-:-:-
chr01	753744	C	T	L1-2-2	CHN01,CHN02,CHN03,CHN04,CHN05,VNM10,TH-KOR01,TH-KOR02,TH-KOR03,TH-KOR04,TH-KOR05,TH-KOR06,TH-KOR07,TH-KOR08,PHL01,VNM01,VNM03,VNM02,VNM04,VNM05,VNM06,VNM07	22	Macma4_01_g01000:intron_variant:-:-:-:-:-
chr01	755393	T	C	L2-1-1-1-1-3-2-2-2-2-2-2-3-2-2	AUS07	1	Macma4_01_g01000:intron_variant:-:-:-:-:-
chr01	759744	C	A	L1-2-2-2-1	VNM04	1	Macma4_01_g01000:upstream_gene_variant:-:-:-:-:-, Macma4_01_g01010:upstream_gene_variant:-:-:-:-:-
chr01	764923	C	T	L2-1-2-1-1-1-1-1-1-1-1-1-2	KOR03,KOR04	2	Macma4_01_g01010:intron_variant:-:-:-:-:-, Macma4_01_g01020:upstream_gene_variant:-:-:-:-:-
chr01	767064	G	C	L2-1-2-1-1-1-1-2	MEX02	1	Macma4_01_g01010:downstream_gene_variant:-:-:-:-:-, Macma4_01_g01020:upstream_gene_variant:-:-:-:-:-
chr01	769178	C	A	L1-2-1-2-1	PHL10	1	Macma4_01_g01010:downstream_gene_variant:-:-:-:-:-, Macma4_01_g01020:3_prime_UTR_variant:1597:-:-:-:-
chr01	782393	T	G	L1-2-2-2-2-2-3-1-1	CHN03	1	Macma4_01_g01030:upstream_gene_variant:-:-:-:-:-, Macma4_01_g01040:downstream_gene_variant:-:-:-:-:-
chr01	785315	G	A	L2-2-2-2-1	MEX01	1	Macma4_01_g01030:synonymous_variant:1074:792:264:L:ttG/ttA, Macma4_01_g01040:downstream_gene_variant:-:-:-:-:-
chr01	792689	G	A	L2-2-2-1-1	UKN02	1	Macma4_01_g01040:intron_variant:-:-:-:-:-
chr01	794140	A	G	L1-2-1-2-1	PHL10	1	Macma4_01_g01040:intron_variant:-:-:-:-:-
chr01	804062	A	G	L2-1-1-1-2-2-1	CRI07	1	Macma4_01_g01050:5_prime_UTR_variant:65:-:-:-:-, Macma4_01_g01060:upstream_gene_variant:-:-:-:-:-
chr01	807216	C	T	L2-1-1-1-2-2-2	ECU05	1	Macma4_01_g01050:intron_variant:-:-:-:-:-, Macma4_01_g01060:upstream_gene_variant:-:-:-:-:-
chr01	817698	G	T	L1-2-1-1	KOR01	1	Macma4_01_g01080:upstream_gene_variant:-:-:-:-:-
chr01	820019	G	T	L2-1-1-1-1-3-2-2-2-2-3-1	COL05	1
chr01	822798	CAGCATCT	C	L1-2-1-2-2-1	VNM09	1	Macma4_01_g01090:upstream_gene_variant:-:-:-:-:-
chr01	823463	G	A	L2-1-2-1-1-1-1-1-1-1-3	HND01	1	Macma4_01_g01090:upstream_gene_variant:-:-:-:-:-
chr01	832419	G	GC	L2-1-2-1-1-1-1-1-1-2-2	PHL09	1	Macma4_01_g01090:downstream_gene_variant:-:-:-:-:-, Macma4_01_g01100:upstream_gene_variant:-:-:-:-:-
chr01	836110	G	C	L2-1-2-1-1-1-1-1-1-2-2	PHL09	1	Macma4_01_g01090:downstream_gene_variant:-:-:-:-:-, Macma4_01_g01100:downstream_gene_variant:-:-:-:-:-, Macma4_01_g01110:downstream_gene_variant:-:-:-:-:-
chr01	836866	A	G	L2-1-2-1-1-1-1-1-2-1	CRI08	1	Macma4_01_g01100:downstream_gene_variant:-:-:-:-:-, Macma4_01_g01110:downstream_gene_variant:-:-:-:-:-
chr01	841787	C	T	L2	AUS01,AUS02,AUS03,AUS04,AUS05,AUS06,AUS07,AUS08,AUS09,AUS10,CMR01,CMR02,ES-CN01,ES-CN02,ES-CN03,ES-CN04,ES-CN05,ES-CN06,ES-CN07,ES-CN08,ES-CN09,ES-CN10,ES-CN11,ES-CN12,ES-CN13,ES-CN14,ES-CN15,ES-CN16,ES-CN17,ES-CN18,ES-CN19,ES-CN20,ES-CN21,ES-CN22,ES-CN23,ES-CN24,ES-CN25,ES-CN26,ES-CN27,ES-CN28,ES-CN29,ES-CN30,ES-CN31,ES-CN32,COL01,COL02,COL03,COL04,COL05,COL06,COL07,CRI01,CRI02,CRI03,CRI04,CRI05…	115	Macma4_01_g01110:intron_variant:-:-:-:-:-, Macma4_01_g01120:downstream_gene_variant:-:-:-:-:-, Macma4_01_g01130:downstream_gene_variant:-:-:-:-:-
chr01	853683	C	T	L2-2-1-1-2	CRI06	1	Macma4_01_g01140:upstream_gene_variant:-:-:-:-:-, Macma4_01_g01150:downstream_gene_variant:-:-:-:-:-
chr01	856235	G	C	L2-1-2-1-1-1-1-1-1-1-1-1-1-1-1-2-2-2	CRI05	1	Macma4_01_g01140:upstream_gene_variant:-:-:-:-:-, Macma4_01_g01150:upstream_gene_variant:-:-:-:-:-
chr01	859915	T	C	L1-2-2-2-2-1	VNM06	1	Macma4_01_g01150:upstream_gene_variant:-:-:-:-:-, Macma4_01_g01160:upstream_gene_variant:-:-:-:-:-
chr01	863117	G	A	L1-2-1-2-2-2-1	PHL05	1	Macma4_01_g01160:missense_variant:525:426:142:M/I:atG/atA, Macma4_01_g01170:upstream_gene_variant:-:-:-:-:-
chr01	867480	C	G	L2-1-2-1-1-1-1-1-1-1-1-2-1-1	ECU06,ECU07,ECU09	3	Macma4_01_g01160:downstream_gene_variant:-:-:-:-:-, Macma4_01_g01170:missense_variant:394:394:132:L/V:Ctg/Gtg, Macma4_01_g01180:downstream_gene_variant:-:-:-:-:-
chr01	874774	C	T	L1-2-1-1	KOR01	1	Macma4_01_g01180:upstream_gene_variant:-:-:-:-:-, Macma4_01_g01190:upstream_gene_variant:-:-:-:-:-, Macma4_01_g01200:upstream_gene_variant:-:-:-:-:-
chr01	875534	T	A	L2-1-2-1-2	GTM01	1	Macma4_01_g01190:upstream_gene_variant:-:-:-:-:-, Macma4_01_g01200:intron_variant:-:-:-:-:-
chr01	879210	G	A	L1-2-2-2-2-2-3-2-1	CHN02,VNM05	2	Macma4_01_g01190:upstream_gene_variant:-:-:-:-:-, Macma4_01_g01200:splice_region_variant,synonymous_variant:687:444:148:R:agG/agA, Macma4_01_g01210:upstream_gene_variant:-:-:-:-:-, Macma4_01_g01220:downstream_gene_variant:-:-:-:-:-
chr01	881852	C	T	L2-1-2-1-1-1-1-1-1-1-1-2-1-3	HND02	1	Macma4_01_g01200:downstream_gene_variant:-:-:-:-:-, Macma4_01_g01210:missense_variant:254:73:25:L/F:Ctc/Ttc, Macma4_01_g01220:downstream_gene_variant:-:-:-:-:-, Macma4_01_g01230:downstream_gene_variant:-:-:-:-:-
chr01	888991	C	A	L2-1-1-1-1-1-2-2-2	ES-CN14	1	Macma4_01_g01220:upstream_gene_variant:-:-:-:-:-, Macma4_01_g01230:intron_variant:-:-:-:-:-, Macma4_01_g01240:upstream_gene_variant:-:-:-:-:-
chr01	889944	C	T	L2-1-1-1-1-1-2-3	ES-CN03,ES-CN04,ES-CN09,ES-CN10	4	Macma4_01_g01230:intron_variant:-:-:-:-:-, Macma4_01_g01240:upstream_gene_variant:-:-:-:-:-
chr01	895520	G	A	L2-1-1-1-1-3-2-2-2-2-3-2-2-1	ECU08	1	Macma4_01_g01230:upstream_gene_variant:-:-:-:-:-, Macma4_01_g01240:intron_variant:-:-:-:-:-, Macma4_01_g01250:upstream_gene_variant:-:-:-:-:-
chr01	898613	C	A	L2-1-2-1-1-1-1-1-1-2-1	PAN01	1	Macma4_01_g01240:downstream_gene_variant:-:-:-:-:-, Macma4_01_g01250:intron_variant:-:-:-:-:-
chr01	920914	G	A	L2-1-1-1-1-3-2-2-2-2-2-1-2	AUS06	1	Macma4_01_g01260:intron_variant:-:-:-:-:-, Macma4_01_g01270:upstream_gene_variant:-:-:-:-:-
chr01	920972	C	A	L2-1-2-1-1-1-1-1-1-1-1-2-1-1	ECU06,ECU07,ECU09	3	Macma4_01_g01260:intron_variant:-:-:-:-:-, Macma4_01_g01270:upstream_gene_variant:-:-:-:-:-
chr01	926169	G	C	L2-1-2-3	DOM04	1	Macma4_01_g01260:upstream_gene_variant:-:-:-:-:-, Macma4_01_g01270:downstream_gene_variant:-:-:-:-:-, Macma4_01_g01280:5_prime_UTR_variant:81:-:-:-:-
chr01	928366	A	C	L1-2-2-2-2-2-3-1-2	CHN04	1	Macma4_01_g01280:intron_variant:-:-:-:-:-
chr01	929776	A	G	L2-1-1-1-1-3-2-2-2-2-3-2-1-1	DOM03	1	Macma4_01_g01280:intron_variant:-:-:-:-:-
chr01	930152	T	A	L2-1-2-2-1-2-1	ECU10	1	Macma4_01_g01280:intron_variant:-:-:-:-:-
chr01	933079	G	A	L2-1-1-1-1-3-2-2-2-2-2-1-1	AUS01	1	Macma4_01_g01280:downstream_gene_variant:-:-:-:-:-, Macma4_01_g01290:downstream_gene_variant:-:-:-:-:-
chr01	935039	T	A	L1-1	KOR06	1	Macma4_01_g01280:downstream_gene_variant:-:-:-:-:-, Macma4_01_g01290:downstream_gene_variant:-:-:-:-:-
chr01	937796	T	A	L2-1-1-1-1-3-2-2-1-2-2-2	ES-CN22	1	Macma4_01_g01290:intron_variant:-:-:-:-:-
chr01	943324	A	C	L1-2-2-2-2-2-3-2-2-2-2-1	TH-KOR07	1	Macma4_01_g01290:upstream_gene_variant:-:-:-:-:-, Macma4_01_g01300:downstream_gene_variant:-:-:-:-:-
chr01	945190	A	G	L1-2-2-2-2-2-2-1	VNM01,VNM03,VNM02	3	Macma4_01_g01290:upstream_gene_variant:-:-:-:-:-, Macma4_01_g01300:intron_variant:-:-:-:-:-
chr01	947003	C	T	L2-1-1-1-1-3-2-2-2-1	PHL08	1	Macma4_01_g01290:upstream_gene_variant:-:-:-:-:-, Macma4_01_g01300:intron_variant:-:-:-:-:-
chr01	950076	C	T	L2-2-1-1-1-1-1	COL06	1	Macma4_01_g01300:missense_variant:359:157:53:G/S:Ggt/Agt
chr01	953244	C	T	L2-1-2-1-1-1-1-1-1-1-1-1-2	KOR03,KOR04	2	Macma4_01_g01300:upstream_gene_variant:-:-:-:-:-, Macma4_01_g01310:upstream_gene_variant:-:-:-:-:-
chr01	956067	C	T	L2-1-2-1-1-2	ES-CN27,ES-CN28	2	Macma4_01_g01300:upstream_gene_variant:-:-:-:-:-, Macma4_01_g01310:upstream_gene_variant:-:-:-:-:-, Macma4_01_g01320:upstream_gene_variant:-:-:-:-:-
chr01	967960	A	G	L1-2-2-2-2-2	CHN01,CHN02,CHN03,CHN04,CHN05,VNM10,TH-KOR01,TH-KOR02,TH-KOR03,TH-KOR04,TH-KOR05,TH-KOR06,TH-KOR07,TH-KOR08,VNM01,VNM03,VNM02,VNM05,VNM07	19	Macma4_01_g01330:intron_variant:-:-:-:-:-, Macma4_01_g01340:downstream_gene_variant:-:-:-:-:-
chr01	971354	T	C	L2-1-1-1-2-2-1	CRI07	1	Macma4_01_g01330:upstream_gene_variant:-:-:-:-:-, Macma4_01_g01340:missense_variant:2504:1522:508:T/A:Acc/Gcc
chr01	988590	C	G	L2-1-2-1-1-1-1-1-1-1-1-1-1-1-1-3	ECU02,ECU03	2	Macma4_01_g01340:upstream_gene_variant:-:-:-:-:-, Macma4_01_g01350:intron_variant:-:-:-:-:-, Macma4_01_g01360:downstream_gene_variant:-:-:-:-:-
chr01	990646	GT	G	L2-2-1-1-2	CRI06	1	Macma4_01_g01340:upstream_gene_variant:-:-:-:-:-, Macma4_01_g01350:frameshift_variant:17:17:6:D/X:gAc/gc, Macma4_01_g01360:downstream_gene_variant:-:-:-:-:-
chr01	994879	C	T	L1-2-2	CHN01,CHN02,CHN03,CHN04,CHN05,VNM10,TH-KOR01,TH-KOR02,TH-KOR03,TH-KOR04,TH-KOR05,TH-KOR06,TH-KOR07,TH-KOR08,PHL01,VNM01,VNM03,VNM02,VNM04,VNM05,VNM06,VNM07	22	Macma4_01_g01350:upstream_gene_variant:-:-:-:-:-, Macma4_01_g01360:intron_variant:-:-:-:-:-
chr01	999642	G	A	L2-1-2-1-1-1-1-1-1-1-1-2-1-1	ECU06,ECU07,ECU09	3	Macma4_01_g01360:intron_variant:-:-:-:-:-, Macma4_01_g01370:downstream_gene_variant:-:-:-:-:-
chr01	1003539	G	C	L2-1-2-1-1-1-1-1-1-1-1-1-1-1-2	NIC02	1	Macma4_01_g01360:upstream_gene_variant:-:-:-:-:-, Macma4_01_g01370:missense_variant:1033:813:271:S/R:agC/agG
chr01	1005458	G	T	L1-2-1-2-2-2-1	PHL05	1	Macma4_01_g01360:upstream_gene_variant:-:-:-:-:-, Macma4_01_g01370:intron_variant:-:-:-:-:-
chr01	1009804	G	A	L2-1-2-1-1-1-1-1-1-1-1-1-1-1-2	NIC02	1	Macma4_01_g01370:intron_variant:-:-:-:-:-, Macma4_01_g01380:upstream_gene_variant:-:-:-:-:-
chr01	1011377	T	A	L2-1-1-1-1-3-2-2-2-2-3-2-2-2-2-2	GHA03	1	Macma4_01_g01370:upstream_gene_variant:-:-:-:-:-, Macma4_01_g01380:upstream_gene_variant:-:-:-:-:-
chr01	1011484	T	TA	L2-2-1-1-1-3	COL01	1	Macma4_01_g01370:upstream_gene_variant:-:-:-:-:-, Macma4_01_g01380:upstream_gene_variant:-:-:-:-:-
chr01	1012910	C	T	L2-1-2-1-1-1-1-1-1-1-1-2-1-1-1-1	ECU09	1	Macma4_01_g01370:upstream_gene_variant:-:-:-:-:-, Macma4_01_g01380:intron_variant:-:-:-:-:-
chr01	1016895	G	C	L2-1-2-1-1-1-1-1-1-1-1-1-1-1-2	NIC02	1	Macma4_01_g01380:splice_polypyrimidine_tract_variant,intron_variant:-:-:-:-:-
chr01	1029273	G	T	L2-1-1-1-1-3-2-2-2-2-3-2-2-2-1	CMR02	1	Macma4_01_g01380:intron_variant:-:-:-:-:-
chr01	1029275	A	T	L2-1-1-1-1-3-2-2-2-2-3-2-2-2-1	CMR02	1	Macma4_01_g01380:intron_variant:-:-:-:-:-
chr01	1030298	T	A	L1-2-2-2-2-2-3-1-2	CHN04	1	Macma4_01_g01380:intron_variant:-:-:-:-:-
chr01	1035054	G	T	L1-2-2-2-2-2-3-2-2-2-1	TH-KOR06,TH-KOR08	2	Macma4_01_g01380:stop_gained:3352:3352:1118:E/*:Gaa/Taa
chr01	1040751	C	T	L1-2-2-2-2-2-3-2-2-1-2	TH-KOR02,TH-KOR04	2	Macma4_01_g01390:upstream_gene_variant:-:-:-:-:-
chr01	1040929	C	G	L2-1-2-1-1-1-1-1-2-2	CRI02	1	Macma4_01_g01390:upstream_gene_variant:-:-:-:-:-
chr01	1046051	C	T	L1-2-2-2-2-2-3-2-1	CHN02,VNM05	2	Macma4_01_g01390:intron_variant:-:-:-:-:-, Macma4_01_g01400:upstream_gene_variant:-:-:-:-:-, Macma4_01_g01410:downstream_gene_variant:-:-:-:-:-
chr01	1047505	G	T	L2-1-2-1-2	GTM01	1	Macma4_01_g01390:downstream_gene_variant:-:-:-:-:-, Macma4_01_g01400:upstream_gene_variant:-:-:-:-:-, Macma4_01_g01410:downstream_gene_variant:-:-:-:-:-
chr01	1050038	T	G	L2-1-1-1-1-1-2-3-1	ES-CN03,ES-CN04	2	Macma4_01_g01390:downstream_gene_variant:-:-:-:-:-, Macma4_01_g01400:synonymous_variant:45:45:15:T:acT/acG, Macma4_01_g01410:downstream_gene_variant:-:-:-:-:-, Macma4_01_g01420:upstream_gene_variant:-:-:-:-:-
chr01	1054551	G	A	L2-1-1-1-1-3-1	AUS09	1	Macma4_01_g01400:downstream_gene_variant:-:-:-:-:-, Macma4_01_g01410:upstream_gene_variant:-:-:-:-:-, Macma4_01_g01420:intron_variant:-:-:-:-:-, Macma4_01_g01430:downstream_gene_variant:-:-:-:-:-
chr01	1054633	C	A	L1-2-1-1	KOR01	1	Macma4_01_g01400:downstream_gene_variant:-:-:-:-:-, Macma4_01_g01410:upstream_gene_variant:-:-:-:-:-, Macma4_01_g01420:intron_variant:-:-:-:-:-, Macma4_01_g01430:downstream_gene_variant:-:-:-:-:-
chr01	1055928	C	T	L1-2-2-2-2	CHN01,CHN02,CHN03,CHN04,CHN05,VNM10,TH-KOR01,TH-KOR02,TH-KOR03,TH-KOR04,TH-KOR05,TH-KOR06,TH-KOR07,TH-KOR08,VNM01,VNM03,VNM02,VNM05,VNM06,VNM07	20	Macma4_01_g01420:synonymous_variant:1954:1734:578:V:gtC/gtT, Macma4_01_g01430:downstream_gene_variant:-:-:-:-:-, Macma4_01_g01440:upstream_gene_variant:-:-:-:-:-
chr01	1062205	C	T	L2-1-1-1-1-2-1	ES-CN20	1	Macma4_01_g01430:upstream_gene_variant:-:-:-:-:-, Macma4_01_g01440:splice_polypyrimidine_tract_variant,intron_variant:-:-:-:-:-, Macma4_01_g01450:upstream_gene_variant:-:-:-:-:-
chr01	1069192	G	A	L1-2-1-1	KOR01	1	Macma4_01_g01450:downstream_gene_variant:-:-:-:-:-, Macma4_01_g01460:intron_variant:-:-:-:-:-
chr01	1069929	G	A	L2-1-2-1-1-1-1-1-1-1-2-1-1	PHL04	1	Macma4_01_g01450:downstream_gene_variant:-:-:-:-:-, Macma4_01_g01460:intron_variant:-:-:-:-:-, Macma4_01_g01470:downstream_gene_variant:-:-:-:-:-
chr01	1081486	C	T	L2-1-2-1-1-1-2-1-1	ES-CN29	1	Macma4_01_g01470:intron_variant:-:-:-:-:-, Macma4_01_g01480:intron_variant:-:-:-:-:-, Macma4_01_g01490:upstream_gene_variant:-:-:-:-:-
chr01	1089909	A	C	L2-1-2-1-1-1-1-1-1-1-1-1-1-1-1-1-2	COL07	1	Macma4_01_g01490:downstream_gene_variant:-:-:-:-:-, Macma4_01_g01500:intron_variant:-:-:-:-:-
chr01	1096014	G	T	L1-2-2-2-2-2-3-2-1-1	VNM05	1	Macma4_01_g01500:upstream_gene_variant:-:-:-:-:-, Macma4_01_g01510:synonymous_variant:805:780:260:I:atC/atA
chr01	1096603	T	C	L2-1-2-1-1-1-1-1-1-1-2-1-1	PHL04	1	Macma4_01_g01500:upstream_gene_variant:-:-:-:-:-, Macma4_01_g01510:intron_variant:-:-:-:-:-
chr01	1098771	C	T	L2-1-2-1-1-1-1-1-1-1-1-1-1-1-1-2-1-1	ES-CN26	1	Macma4_01_g01500:upstream_gene_variant:-:-:-:-:-, Macma4_01_g01510:missense_variant:251:226:76:D/N:Gac/Aac
chr01	1103597	T	C	L2-1-1-1-1-3-2-2-2-2-3-1	COL05	1	Macma4_01_g01510:upstream_gene_variant:-:-:-:-:-, Macma4_01_g01520:upstream_gene_variant:-:-:-:-:-
chr01	1115739	G	A	L1-2-2-2-2-2	CHN01,CHN02,CHN03,CHN04,CHN05,VNM10,TH-KOR01,TH-KOR02,TH-KOR03,TH-KOR04,TH-KOR05,TH-KOR06,TH-KOR07,TH-KOR08,VNM01,VNM03,VNM02,VNM05,VNM07	19	Macma4_01_g01530:intron_variant:-:-:-:-:-
chr01	1118002	G	T	L2-1-2-1-1-1-1-1-1-1-1-2-2-1-1	GLP03	1	Macma4_01_g01530:missense_variant:661:557:186:P/Q:cCa/cAa
chr01	1118691	T	G	L2-1-1-1-1-3-2-2-2-2-3-2-1-1	DOM03	1	Macma4_01_g01530:intron_variant:-:-:-:-:-
chr01	1120201	C	G	L2-1-1-1-1-3-2-2-1-2-2	ES-CN21,ES-CN22	2	Macma4_01_g01530:intron_variant:-:-:-:-:-, Macma4_01_g01540:downstream_gene_variant:-:-:-:-:-
chr01	1120682	G	A	L2-1-2-1-1-1-1-2	MEX02	1	Macma4_01_g01530:upstream_gene_variant:-:-:-:-:-, Macma4_01_g01540:downstream_gene_variant:-:-:-:-:-
chr01	1120822	A	G	L1-2-1-2-1	PHL10	1	Macma4_01_g01530:upstream_gene_variant:-:-:-:-:-, Macma4_01_g01540:downstream_gene_variant:-:-:-:-:-
chr01	1123350	G	A	L1-2-1-1	KOR01	1	Macma4_01_g01530:upstream_gene_variant:-:-:-:-:-, Macma4_01_g01540:downstream_gene_variant:-:-:-:-:-
chr01	1197306	C	T	L2-2-1-1-2	CRI06	1	Macma4_01_g01700:downstream_gene_variant:-:-:-:-:-, Macma4_01_g01710:downstream_gene_variant:-:-:-:-:-
chr01	1209640	C	T	L2-1-1-1-2-2-1	CRI07	1	Macma4_01_g01730:downstream_gene_variant:-:-:-:-:-, Macma4_01_g01740:downstream_gene_variant:-:-:-:-:-, Macma4_01_g01750:upstream_gene_variant:-:-:-:-:-
chr01	1220767	G	A	L2-1-2-1-1-1-3	GHA01,GHA02	2	Macma4_01_g01760:downstream_gene_variant:-:-:-:-:-, Macma4_01_g01770:synonymous_variant:4061:3198:1066:P:ccC/ccT
chr01	1229309	T	C	L2-1-2-1-1-1-2-1-1	ES-CN29	1	Macma4_01_g01770:missense_variant:1057:194:65:D/G:gAc/gGc, Macma4_01_g01780:upstream_gene_variant:-:-:-:-:-
chr01	1229502	T	G	L1-2-2-2-2-2-2-2-2-1	CHN05	1	Macma4_01_g01770:splice_donor_region_variant,intron_variant:-:-:-:-:-, Macma4_01_g01780:upstream_gene_variant:-:-:-:-:-
chr01	1234887	T	C	L2-1-1-1-1-1-2-3-1	ES-CN03,ES-CN04	2	Macma4_01_g01770:upstream_gene_variant:-:-:-:-:-, Macma4_01_g01780:intron_variant:-:-:-:-:-, Macma4_01_g01790:downstream_gene_variant:-:-:-:-:-
chr01	1237362	A	G	L1-2-2-2-2-2	CHN01,CHN02,CHN03,CHN04,CHN05,VNM10,TH-KOR01,TH-KOR02,TH-KOR03,TH-KOR04,TH-KOR05,TH-KOR06,TH-KOR07,TH-KOR08,VNM01,VNM03,VNM02,VNM05,VNM07	19	Macma4_01_g01780:downstream_gene_variant:-:-:-:-:-, Macma4_01_g01790:intron_variant:-:-:-:-:-
chr01	1245364	G	A	L2-1-1-1-1-3-2-2-2-2-2-1-1	AUS01	1	Macma4_01_g01790:upstream_gene_variant:-:-:-:-:-, Macma4_01_g01800:upstream_gene_variant:-:-:-:-:-, Macma4_01_g01810:downstream_gene_variant:-:-:-:-:-
chr01	1298422	G	T	L1-2-2-2-2-2-3-2-2-2-2-1	TH-KOR07	1	Macma4_01_g01930:intron_variant:-:-:-:-:-, Macma4_01_g01940:missense_variant:826:617:206:T/N:aCt/aAt
chr01	1305272	A	G	L2-1-2-1-1-1-3-1	GHA02	1	Macma4_01_g01930:intron_variant:-:-:-:-:-, Macma4_01_g01950:upstream_gene_variant:-:-:-:-:-
chr01	1306071	G	A	L2-1-1-1-1-3-2-2-1-1-1	ECU01	1	Macma4_01_g01930:upstream_gene_variant:-:-:-:-:-, Macma4_01_g01950:upstream_gene_variant:-:-:-:-:-
chr01	1312972	G	T	L2-1-2-1-1-1-1-1-2-2	CRI02	1	Macma4_01_g01950:synonymous_variant:210:210:70:T:acG/acT
chr01	1316984	C	T	L2-1-1-1-1-3-2-2-2-2-3-1	COL05	1	Macma4_01_g01950:downstream_gene_variant:-:-:-:-:-, Macma4_01_g01960:downstream_gene_variant:-:-:-:-:-
chr01	1319370	G	A	L2-1-2-1-1-2	ES-CN27,ES-CN28	2	Macma4_01_g01960:intron_variant:-:-:-:-:-
chr01	1322199	C	T	L2-1-1-1-1-3-2-2-1-2-1	NIC01	1	Macma4_01_g01960:upstream_gene_variant:-:-:-:-:-, Macma4_01_g01970:downstream_gene_variant:-:-:-:-:-
chr01	1330523	C	A	L2-1-2-1-1-1-1-1-2	CRI02,CRI08	2	Macma4_01_g01970:missense_variant:1776:1341:447:M/I:atG/atT
chr01	1334592	T	C	L1-2-2-2-1	VNM04	1	Macma4_01_g01970:missense_variant:970:535:179:T/A:Acc/Gcc
chr01	1337884	A	G	L2-1-2-1-1-1-1-1-1-1-1-1-1-1-1-1-1-1	CRI09,CRI10	2	Macma4_01_g01970:intron_variant:-:-:-:-:-, Macma4_01_g01980:downstream_gene_variant:-:-:-:-:-
chr01	1348727	TTC	T	L2-1-1-1-1-3-2-2-2-2-3-2-2-2-2-1	CMR01	1	Macma4_01_g01980:upstream_gene_variant:-:-:-:-:-, Macma4_01_g01990:3_prime_UTR_variant:705-706:-:-:-:-, Macma4_01_g02000:downstream_gene_variant:-:-:-:-:-
chr01	1350140	C	T	L2-1-2-1-1-1-1-1-1-1-1-2-1-1-1-1	ECU09	1	Macma4_01_g01980:upstream_gene_variant:-:-:-:-:-, Macma4_01_g01990:downstream_gene_variant:-:-:-:-:-, Macma4_01_g02000:stop_gained:388:131:44:W/*:tGg/tAg, Macma4_01_g02010:upstream_gene_variant:-:-:-:-:-
chr01	1353172	C	T	L2-1-2-1-1-1-1-2	MEX02	1	Macma4_01_g01990:downstream_gene_variant:-:-:-:-:-, Macma4_01_g02000:upstream_gene_variant:-:-:-:-:-, Macma4_01_g02010:upstream_gene_variant:-:-:-:-:-
chr01	1355111	C	G	L1-2-2-2-2-2-2-1-1	VNM01	1	Macma4_01_g02000:upstream_gene_variant:-:-:-:-:-, Macma4_01_g02010:intron_variant:-:-:-:-:-
chr01	1357293	T	C	L2-1-1-1-1-3-2-2-2-2-3-1	COL05	1	Macma4_01_g02010:missense_variant:1416:1166:389:V/A:gTc/gCc, Macma4_01_g02020:downstream_gene_variant:-:-:-:-:-
chr01	1357672	G	A	L2-1-2-1-1-1-1-1-1-1-1-1-1-1-1-1-1-2-2	CRI03	1	Macma4_01_g02010:synonymous_variant:1795:1545:515:Q:caG/caA, Macma4_01_g02020:downstream_gene_variant:-:-:-:-:-
chr01	1362740	G	A	L1-1	KOR06	1	Macma4_01_g02010:downstream_gene_variant:-:-:-:-:-, Macma4_01_g02020:upstream_gene_variant:-:-:-:-:-
chr01	1380436	C	T	L2-1-1-1-1-1-2-4-2-1	ES-CN15	1	Macma4_01_g02050:intron_variant:-:-:-:-:-, Macma4_01_g02060:upstream_gene_variant:-:-:-:-:-
chr01	1382195	T	G	L2-1-2-1-1-1-1-1-1-2-1	PAN01	1	Macma4_01_g02050:5_prime_UTR_variant:250:-:-:-:-, Macma4_01_g02060:upstream_gene_variant:-:-:-:-:-
chr01	1384471	T	A	L2-1-2-1-1-1-1-1-1-1-1-2-1-1	ECU06,ECU07,ECU09	3	Macma4_01_g02050:upstream_gene_variant:-:-:-:-:-, Macma4_01_g02060:intron_variant:-:-:-:-:-, Macma4_01_g02070:downstream_gene_variant:-:-:-:-:-
chr01	1384475	T	A	L2-1-2-1-1-1-1-1-1-1-1-2-1-1	ECU06,ECU07,ECU09	3	Macma4_01_g02050:upstream_gene_variant:-:-:-:-:-, Macma4_01_g02060:intron_variant:-:-:-:-:-, Macma4_01_g02070:downstream_gene_variant:-:-:-:-:-
chr01	1384991	C	G	L1-2-2-2-2-2-3-2-2-1	TH-KOR01,TH-KOR02,TH-KOR04	3	Macma4_01_g02050:upstream_gene_variant:-:-:-:-:-, Macma4_01_g02060:intron_variant:-:-:-:-:-, Macma4_01_g02070:downstream_gene_variant:-:-:-:-:-
chr01	1386042	G	A	L1-2-1-2-1	PHL10	1	Macma4_01_g02050:upstream_gene_variant:-:-:-:-:-, Macma4_01_g02060:missense_variant:657:521:174:R/H:cGc/cAc, Macma4_01_g02070:downstream_gene_variant:-:-:-:-:-, Macma4_01_g02080:downstream_gene_variant:-:-:-:-:-
chr01	1387501	A	G	L1-2-2-2-2-2-1	CHN01	1	Macma4_01_g02060:missense_variant:1379:1243:415:M/V:Atg/Gtg, Macma4_01_g02070:downstream_gene_variant:-:-:-:-:-, Macma4_01_g02080:downstream_gene_variant:-:-:-:-:-
chr01	1393677	T	A	L2-2-1-1-1-3	COL01	1	Macma4_01_g02070:upstream_gene_variant:-:-:-:-:-, Macma4_01_g02080:upstream_gene_variant:-:-:-:-:-, Macma4_01_g02090:upstream_gene_variant:-:-:-:-:-
chr01	1395498	G	A	L2-1-2-1-1-1-1-1-1-1-1-2-1-1	ECU06,ECU07,ECU09	3	Macma4_01_g02080:upstream_gene_variant:-:-:-:-:-, Macma4_01_g02090:5_prime_UTR_variant:421:-:-:-:-, Macma4_01_g02100:upstream_gene_variant:-:-:-:-:-
chr01	1404763	A	C	L2-1-2-1-1-1-1-1-1-1-1-2-2-2	COL04	1	Macma4_01_g02100:downstream_gene_variant:-:-:-:-:-, Macma4_01_g02110:downstream_gene_variant:-:-:-:-:-, Macma4_01_g02120:intron_variant:-:-:-:-:-, Macma4_01_g02130:downstream_gene_variant:-:-:-:-:-
chr01	1406360	C	A	L2-2-2-1-2	UKN01	1	Macma4_01_g02110:downstream_gene_variant:-:-:-:-:-, Macma4_01_g02120:intron_variant:-:-:-:-:-, Macma4_01_g02130:downstream_gene_variant:-:-:-:-:-
chr01	1407242	T	C	L1-2-2-2-2-2-3-2-2-2-2-2-2	TH-KOR05	1	Macma4_01_g02120:intron_variant:-:-:-:-:-, Macma4_01_g02130:downstream_gene_variant:-:-:-:-:-
chr01	1408166	A	C	L2-1-1-1-1-1-2-5-2-1	ES-CN06	1	Macma4_01_g02120:5_prime_UTR_variant:17:-:-:-:-, Macma4_01_g02130:downstream_gene_variant:-:-:-:-:-
chr01	1408397	T	G	L2	AUS01,AUS02,AUS03,AUS04,AUS05,AUS06,AUS07,AUS08,AUS09,AUS10,CMR01,CMR02,ES-CN01,ES-CN02,ES-CN03,ES-CN04,ES-CN05,ES-CN06,ES-CN07,ES-CN08,ES-CN09,ES-CN10,ES-CN11,ES-CN12,ES-CN13,ES-CN14,ES-CN15,ES-CN16,ES-CN17,ES-CN18,ES-CN19,ES-CN20,ES-CN21,ES-CN22,ES-CN23,ES-CN24,ES-CN25,ES-CN26,ES-CN27,ES-CN28,ES-CN29,ES-CN30,ES-CN31,ES-CN32,COL01,COL02,COL03,COL04,COL05,COL06,COL07,CRI01,CRI02,CRI03,CRI04,CRI05…	115	Macma4_01_g02120:upstream_gene_variant:-:-:-:-:-, Macma4_01_g02130:downstream_gene_variant:-:-:-:-:-
chr01	1414158	C	A	L2-2-2-2-1	MEX01	1	Macma4_01_g02130:upstream_gene_variant:-:-:-:-:-, Macma4_01_g02140:upstream_gene_variant:-:-:-:-:-, Macma4_01_g02150:upstream_gene_variant:-:-:-:-:-
chr01	1427360	C	T	L2-1-1-1-1-3-2-2-2-2-3-2-2-2-2-2	GHA03	1	Macma4_01_g02160:missense_variant:865:503:168:A/V:gCt/gTt
chr01	1428200	T	C	L1-2-2-2-2-2-3-2-2	TH-KOR01,TH-KOR02,TH-KOR03,TH-KOR04,TH-KOR05,TH-KOR06,TH-KOR07,TH-KOR08	8	Macma4_01_g02160:intron_variant:-:-:-:-:-
chr01	1432238	C	A	L1-2-2-2-1	VNM04	1	Macma4_01_g02160:missense_variant:2602:2240:747:P/H:cCt/cAt, Macma4_01_g02170:upstream_gene_variant:-:-:-:-:-
chr01	1432895	C	A	L1-2-2-2-1	VNM04	1	Macma4_01_g02160:missense_variant:3259:2897:966:P/Q:cCa/cAa, Macma4_01_g02170:upstream_gene_variant:-:-:-:-:-
chr01	1446873	A	C	L2-1-1-1-1-3-2-2-1-1-2-2	AUS03	1	Macma4_01_g02170:downstream_gene_variant:-:-:-:-:-, Macma4_01_g02180:intron_variant:-:-:-:-:-, Macma4_01_g02190:upstream_gene_variant:-:-:-:-:-
chr01	1449200	A	C	L2-1-1-1-1-3-2-2-2-2-2-2-1	AUS08	1	Macma4_01_g02180:synonymous_variant:955:679:227:R:Aga/Cga, Macma4_01_g02190:upstream_gene_variant:-:-:-:-:-
chr01	1449897	C	T	L2-1-2-1-1-1-1-1-1-1-1-2-1-1-1-2	ECU07	1	Macma4_01_g02180:downstream_gene_variant:-:-:-:-:-, Macma4_01_g02190:upstream_gene_variant:-:-:-:-:-
chr01	1455542	G	A	L2-1-1-1-1-3-2-2-2-2-3-2-2-2-1	CMR02	1	Macma4_01_g02190:intron_variant:-:-:-:-:-, Macma4_01_g02200:downstream_gene_variant:-:-:-:-:-
chr01	1458518	T	A	L2-1-2-1-1-1-1-1-1-1-1-1-1-1-1-2-2-2	CRI05	1	Macma4_01_g02190:downstream_gene_variant:-:-:-:-:-, Macma4_01_g02200:missense_variant:2803:2717:906:Y/F:tAc/tTc
chr01	1469152	C	T	L2-1-2-1-1-1-1-1-1-1-1-1-1-1-1-1-1-2-2	CRI03	1	Macma4_01_g02210:downstream_gene_variant:-:-:-:-:-, Macma4_01_g02220:intron_variant:-:-:-:-:-, Macma4_01_g02230:upstream_gene_variant:-:-:-:-:-
chr01	1470062	T	A	L2-1-2-1-1-1-1-1-1-1-1-1-1-1-1-1-2	COL07	1	Macma4_01_g02210:downstream_gene_variant:-:-:-:-:-, Macma4_01_g02220:intron_variant:-:-:-:-:-, Macma4_01_g02230:upstream_gene_variant:-:-:-:-:-
chr01	1471947	C	T	L2-1-2-1-1-1-1-1-1-1-1-2-2-2	COL04	1	Macma4_01_g02220:missense_variant:1622:784:262:R/W:Cgg/Tgg, Macma4_01_g02230:upstream_gene_variant:-:-:-:-:-
chr01	1473298	C	A	L2-1-1-1-1-3-2-2-2-2-3-1	COL05	1	Macma4_01_g02220:downstream_gene_variant:-:-:-:-:-, Macma4_01_g02230:intron_variant:-:-:-:-:-
chr01	1477963	TA	T	L2-1-2-1-1-1-1-1-1-1-1-1-1-1-1-1-1-1-1	CRI10	1	Macma4_01_g02230:intron_variant:-:-:-:-:-, Macma4_01_g02240:downstream_gene_variant:-:-:-:-:-
chr01	1478421	A	C	L1-2-2-2-2-2-3-2-1	CHN02,VNM05	2	Macma4_01_g02230:synonymous_variant:1401:1401:467:G:ggA/ggC, Macma4_01_g02240:downstream_gene_variant:-:-:-:-:-
chr01	1479181	A	G	L1-2-1-2-1	PHL10	1	Macma4_01_g02230:downstream_gene_variant:-:-:-:-:-, Macma4_01_g02240:downstream_gene_variant:-:-:-:-:-
chr01	1485799	C	T	L2-1-1-1-1-3-2-2-2-2-3-1	COL05	1	Macma4_01_g02240:upstream_gene_variant:-:-:-:-:-, Macma4_01_g02250:intron_variant:-:-:-:-:-, Macma4_01_g02260:upstream_gene_variant:-:-:-:-:-
chr01	1492677	C	T	L1-2-1-2-1	PHL10	1	Macma4_01_g02260:3_prime_UTR_variant:732:-:-:-:-
chr01	1493422	A	G	L2-1-2-1-1-1-1-1-1-2-1	PAN01	1	Macma4_01_g02260:downstream_gene_variant:-:-:-:-:-, Macma4_01_g02270:downstream_gene_variant:-:-:-:-:-
chr01	1497340	A	C	L1-2-2-2-2-2-1	CHN01	1	Macma4_01_g02260:downstream_gene_variant:-:-:-:-:-, Macma4_01_g02270:downstream_gene_variant:-:-:-:-:-, Macma4_01_g02280:downstream_gene_variant:-:-:-:-:-
chr01	1501020	T	C	L2-1-2-1-1-1-1-1-1-2-2	PHL09	1	Macma4_01_g02270:upstream_gene_variant:-:-:-:-:-, Macma4_01_g02280:downstream_gene_variant:-:-:-:-:-
chr01	1513740	C	A	L2-2-1-1-2	CRI06	1	Macma4_01_g02300:intron_variant:-:-:-:-:-, Macma4_01_g02310:upstream_gene_variant:-:-:-:-:-
chr01	1514342	G	A	L2-1-1-1-1-3-2-2-1-2-2	ES-CN21,ES-CN22	2	Macma4_01_g02300:intron_variant:-:-:-:-:-, Macma4_01_g02310:upstream_gene_variant:-:-:-:-:-
chr01	1515545	G	A	L1-2-2-2-1	VNM04	1	Macma4_01_g02300:intron_variant:-:-:-:-:-, Macma4_01_g02310:upstream_gene_variant:-:-:-:-:-
chr01	1524431	C	T	L2-1-2-1-1-1-1-1-1-2-1	PAN01	1	Macma4_01_g02310:intron_variant:-:-:-:-:-, Macma4_01_g02320:intron_variant:-:-:-:-:-
chr01	1536886	A	G	L2-1-2-1-1-1-1-2	MEX02	1
chr01	1538947	C	A	L2-1-2-1-1-1-1-1-1-2-1	PAN01	1
chr01	1540253	G	A	L2-1-1-1-1-3-2-1	DOM01,DOM02	2
chr01	1548699	C	T	L2-1-2-3	DOM04	1	Macma4_01_g02330:upstream_gene_variant:-:-:-:-:-, Macma4_01_g02340:upstream_gene_variant:-:-:-:-:-, Macma4_01_g02350:downstream_gene_variant:-:-:-:-:-, Macma4_01_g02360:upstream_gene_variant:-:-:-:-:-
chr01	1549212	C	A	L2-1-1-1-1-3-1	AUS09	1	Macma4_01_g02330:upstream_gene_variant:-:-:-:-:-, Macma4_01_g02340:upstream_gene_variant:-:-:-:-:-, Macma4_01_g02350:downstream_gene_variant:-:-:-:-:-, Macma4_01_g02360:upstream_gene_variant:-:-:-:-:-
chr01	1549596	ACCAAG	A	L2-1-1-1-1-3-1	AUS09	1	Macma4_01_g02330:upstream_gene_variant:-:-:-:-:-, Macma4_01_g02340:upstream_gene_variant:-:-:-:-:-, Macma4_01_g02350:downstream_gene_variant:-:-:-:-:-, Macma4_01_g02360:upstream_gene_variant:-:-:-:-:-
chr01	1558037	T	A	L1-2-2-2-2-2-3-2-1	CHN02,VNM05	2	Macma4_01_g02370:upstream_gene_variant:-:-:-:-:-, Macma4_01_g02380:downstream_gene_variant:-:-:-:-:-
chr01	1572038	A	C	L2-1-2-1-1-1-1-1-2-1	CRI08	1	Macma4_01_g02400:downstream_gene_variant:-:-:-:-:-, Macma4_01_g02410:downstream_gene_variant:-:-:-:-:-, Macma4_01_g02420:upstream_gene_variant:-:-:-:-:-
chr01	1572156	C	A	L1-2-2-2-2-2-3-2-2-2-1	TH-KOR06,TH-KOR08	2	Macma4_01_g02400:downstream_gene_variant:-:-:-:-:-, Macma4_01_g02410:downstream_gene_variant:-:-:-:-:-, Macma4_01_g02420:upstream_gene_variant:-:-:-:-:-
chr01	1579761	T	A	L2-1-1-1-1-1-2-3-2-2	ES-CN10	1	Macma4_01_g02420:downstream_gene_variant:-:-:-:-:-, Macma4_01_g02430:missense_variant:254:205:69:S/C:Agt/Tgt, Macma4_01_g02440:upstream_gene_variant:-:-:-:-:-, Macma4_01_g02460:downstream_gene_variant:-:-:-:-:-
chr01	1579788	G	T	L2-1-2-1-1-1-1-2	MEX02	1	Macma4_01_g02420:downstream_gene_variant:-:-:-:-:-, Macma4_01_g02430:missense_variant,splice_region_variant:227:178:60:P/T:Cct/Act, Macma4_01_g02440:upstream_gene_variant:-:-:-:-:-, Macma4_01_g02460:downstream_gene_variant:-:-:-:-:-
chr01	1580176	G	T	L2-1-1-1-1-1-2-2	ES-CN13,ES-CN14	2	Macma4_01_g02420:downstream_gene_variant:-:-:-:-:-, Macma4_01_g02430:intron_variant:-:-:-:-:-, Macma4_01_g02440:upstream_gene_variant:-:-:-:-:-, Macma4_01_g02460:downstream_gene_variant:-:-:-:-:-
chr01	1591223	C	T	L2-1-1-1-1-3-2-2-2-2-3-2-2-2-1	CMR02	1	Macma4_01_g02450:downstream_gene_variant:-:-:-:-:-, Macma4_01_g02460:upstream_gene_variant:-:-:-:-:-, Macma4_01_g02470:missense_variant:320:158:53:P/L:cCc/cTc, Macma4_01_g02480:upstream_gene_variant:-:-:-:-:-
chr01	1600750	G	T	L2-1-2-1-1-1-1-1-1-1-1-1-1-1-1-3	ECU02,ECU03	2	Macma4_01_g02480:downstream_gene_variant:-:-:-:-:-, Macma4_01_g02490:upstream_gene_variant:-:-:-:-:-
chr01	1601003	G	A	L2-1-2-1-1-1-1-1-1-1-1-1-1-1-1-2-1-2	ES-CN25	1	Macma4_01_g02480:downstream_gene_variant:-:-:-:-:-, Macma4_01_g02490:upstream_gene_variant:-:-:-:-:-
chr01	1602793	C	T	L2-1-1-1-1-3-2-2-2-2-3-2-2-2-1	CMR02	1	Macma4_01_g02480:downstream_gene_variant:-:-:-:-:-, Macma4_01_g02490:missense_variant:1213:610:204:R/C:Cgc/Tgc, Macma4_01_g02500:upstream_gene_variant:-:-:-:-:-
chr01	1607972	G	A	L1-1	KOR06	1	Macma4_01_g02490:downstream_gene_variant:-:-:-:-:-, Macma4_01_g02500:synonymous_variant:964:549:183:T:acG/acA, Macma4_01_g02510:downstream_gene_variant:-:-:-:-:-
chr01	1615448	G	A	L2-1-2-1-1-1-3	GHA01,GHA02	2	Macma4_01_g02500:downstream_gene_variant:-:-:-:-:-, Macma4_01_g02510:upstream_gene_variant:-:-:-:-:-, Macma4_01_g02520:upstream_gene_variant:-:-:-:-:-
chr01	1616383	A	G	L2-1-2-1-1-1-1-2	MEX02	1	Macma4_01_g02510:upstream_gene_variant:-:-:-:-:-, Macma4_01_g02520:upstream_gene_variant:-:-:-:-:-
chr01	1618135	G	C	L2-1-1-1-1-2-2-1	COL03	1	Macma4_01_g02510:upstream_gene_variant:-:-:-:-:-, Macma4_01_g02520:upstream_gene_variant:-:-:-:-:-
chr01	1619052	T	G	L2-2-1-2	COL02	1	Macma4_01_g02510:upstream_gene_variant:-:-:-:-:-, Macma4_01_g02520:upstream_gene_variant:-:-:-:-:-, Macma4_01_g02530:downstream_gene_variant:-:-:-:-:-
chr01	1624122	A	T	L2-1-1-1-1-3-2-2-1-2-2-2	ES-CN22	1	Macma4_01_g02520:downstream_gene_variant:-:-:-:-:-, Macma4_01_g02530:3_prime_UTR_variant:2450:-:-:-:-
chr01	1633025	C	T	L1-2-2-2-2-2-3-2-2-2-2-2	TH-KOR03,TH-KOR05	2	Macma4_01_g02530:upstream_gene_variant:-:-:-:-:-, Macma4_01_g02540:missense_variant:429:365:122:C/Y:tGc/tAc, Macma4_01_g02550:upstream_gene_variant:-:-:-:-:-
chr01	1645615	C	T	L2-1-2-1-1-1-2-1-1	ES-CN29	1	Macma4_01_g02560:downstream_gene_variant:-:-:-:-:-
chr01	1645809	C	G	L2-1-1-1-1-1-2-5-2-3-2-1	ES-CN05	1	Macma4_01_g02560:downstream_gene_variant:-:-:-:-:-
chr01	1674046	G	T	L1-2-2-2-2-2-3-1-2	CHN04	1	Macma4_01_g02600:intron_variant:-:-:-:-:-
chr01	1675580	C	A	L2-1-2-1-2	GTM01	1	Macma4_01_g02600:intron_variant:-:-:-:-:-
chr01	1686549	C	T	L1-2-1-1	KOR01	1	Macma4_01_g02600:downstream_gene_variant:-:-:-:-:-, Macma4_01_g02610:intron_variant:-:-:-:-:-
chr01	1688748	A	G	L2-1-2-1-1-1-1-1-1-1-1-1-1-1-1-2-1	ES-CN25,ES-CN26	2	Macma4_01_g02610:intron_variant:-:-:-:-:-
chr01	1688916	G	T	L2-1-1-1-1-3-2-2-2-2-2-2-2	AUS05	1	Macma4_01_g02610:missense_variant:1056:335:112:P/Q:cCa/cAa
chr01	1690247	C	A	L2-1-2-1-1-1-1-1-2-1	CRI08	1	Macma4_01_g02610:intron_variant:-:-:-:-:-
chr01	1698174	T	G	L2-1-1-1-1-3-2-2-2-2-3-2-2-2-2-1	CMR01	1	Macma4_01_g02620:intron_variant:-:-:-:-:-
chr01	1700694	A	C	L1-2-2-2-2-2-3-2-2-1-1	TH-KOR01	1	Macma4_01_g02620:intron_variant:-:-:-:-:-
chr01	1701682	G	A	L2-1-2-1-1-1-1-1-2-1	CRI08	1	Macma4_01_g02620:intron_variant:-:-:-:-:-
chr01	1702185	G	A	L2-1-2-1-1-1-2-1-2	GTM03	1	Macma4_01_g02620:intron_variant:-:-:-:-:-
chr01	1704407	A	G	L1-2-2-2-2-2-3-1-1	CHN03	1	Macma4_01_g02620:intron_variant:-:-:-:-:-
chr01	1706013	AC	A	L2-1-2-1-1-1-1-1-1-1-1-1-1	ES-CN25,ES-CN26,ES-CN31,ES-CN32,COL07,CRI03,CRI04,CRI05,CRI09,CRI10,ECU02,ECU03,GLP01,NIC02	14	Macma4_01_g02620:intron_variant:-:-:-:-:-
chr01	1711208	T	G	L1-2-2-2-1	VNM04	1	Macma4_01_g02620:intron_variant:-:-:-:-:-, Macma4_01_g02630:upstream_gene_variant:-:-:-:-:-
chr01	1713866	G	T	L2-1-2-1-1-1-1-1-1-1-1-2-1-1	ECU06,ECU07,ECU09	3	Macma4_01_g02620:downstream_gene_variant:-:-:-:-:-, Macma4_01_g02630:intron_variant:-:-:-:-:-, Macma4_01_g02640:upstream_gene_variant:-:-:-:-:-
chr01	1714312	C	T	L2-1-2-3	DOM04	1	Macma4_01_g02620:downstream_gene_variant:-:-:-:-:-, Macma4_01_g02630:intron_variant:-:-:-:-:-, Macma4_01_g02640:upstream_gene_variant:-:-:-:-:-
chr01	1714525	A	T	L2-1-1-1-2-2-1	CRI07	1	Macma4_01_g02620:downstream_gene_variant:-:-:-:-:-, Macma4_01_g02630:intron_variant:-:-:-:-:-, Macma4_01_g02640:upstream_gene_variant:-:-:-:-:-
chr01	1718196	G	T	L1-2-2-2-2-2-3-2-2-2-2-1	TH-KOR07	1	Macma4_01_g02630:downstream_gene_variant:-:-:-:-:-, Macma4_01_g02640:upstream_gene_variant:-:-:-:-:-
chr01	1725412	A	G	L1-2-2-2-2-2-3-1-1	CHN03	1	Macma4_01_g02640:splice_polypyrimidine_tract_variant,intron_variant:-:-:-:-:-
chr01	1733077	A	G	L2-1-2-1-1-1-1-2	MEX02	1	Macma4_01_g02640:downstream_gene_variant:-:-:-:-:-, Macma4_01_g02650:upstream_gene_variant:-:-:-:-:-, Macma4_01_g02660:downstream_gene_variant:-:-:-:-:-
chr01	1735870	A	T	L1-2-2-2-2-1	VNM06	1	Macma4_01_g02640:downstream_gene_variant:-:-:-:-:-, Macma4_01_g02650:missense_variant:281:281:94:K/M:aAg/aTg, Macma4_01_g02660:downstream_gene_variant:-:-:-:-:-, Macma4_01_g02670:upstream_gene_variant:-:-:-:-:-
chr01	1743164	G	T	L2-1-2-1-1-1-2-1-1	ES-CN29	1	Macma4_01_g02670:missense_variant:973:448:150:A/S:Gca/Tca
chr01	1749250	A	T	L1-2-2-2-2-2-2-1-1	VNM01	1	Macma4_01_g02670:3_prime_UTR_variant:3831:-:-:-:-, Macma4_01_g02680:downstream_gene_variant:-:-:-:-:-
chr01	1751244	C	T	L1-2-2-2-2-1	VNM06	1	Macma4_01_g02670:downstream_gene_variant:-:-:-:-:-, Macma4_01_g02680:upstream_gene_variant:-:-:-:-:-
chr01	1757585	T	C	L2-1-2-1-1-1-1-1-1-2-1	PAN01	1	Macma4_01_g02690:downstream_gene_variant:-:-:-:-:-
chr01	1761008	C	T	L2-1-1-1-1-3-2-2-2-2-3-1	COL05	1	Macma4_01_g02690:upstream_gene_variant:-:-:-:-:-, Macma4_01_g02700:downstream_gene_variant:-:-:-:-:-
chr01	1764136	C	G	L2-1-2-1-1-1-1-1-1-2-2	PHL09	1	Macma4_01_g02690:upstream_gene_variant:-:-:-:-:-, Macma4_01_g02700:downstream_gene_variant:-:-:-:-:-, Macma4_01_g02710:upstream_gene_variant:-:-:-:-:-, Macma4_01_g02720:downstream_gene_variant:-:-:-:-:-
chr01	1773696	G	T	L2-1-2-1-1-1-1-1-1-1-1-1-1-1-1-1-1-1-1	CRI10	1	Macma4_01_g02720:upstream_gene_variant:-:-:-:-:-, Macma4_01_g02730:downstream_gene_variant:-:-:-:-:-
chr01	1773803	C	A	L2-1-1-1-1-3-2-2-2-2-3-1	COL05	1	Macma4_01_g02720:upstream_gene_variant:-:-:-:-:-, Macma4_01_g02730:downstream_gene_variant:-:-:-:-:-
chr01	1778381	G	A	L2-1-2-1-1-1-1-2	MEX02	1	Macma4_01_g02730:downstream_gene_variant:-:-:-:-:-
chr01	1782344	T	C	L1-2-1-1	KOR01	1	Macma4_01_g02730:upstream_gene_variant:-:-:-:-:-
chr01	1785220	C	T	L2-1-1-1-1-3-2-2-2-2-2-1-2	AUS06	1	Macma4_01_g02730:upstream_gene_variant:-:-:-:-:-
chr01	1785585	C	T	L2-1-1-1-1-3-2-2-1-2-2	ES-CN21,ES-CN22	2	Macma4_01_g02730:upstream_gene_variant:-:-:-:-:-
chr01	1788930	G	T	L2-1-2-1-1-1-1-1-1-1-1-1-1-1-1-1-1-1	CRI09,CRI10	2
chr01	1793017	A	T	L1-2-2-2-2-2-2-2-2-1	CHN05	1	Macma4_01_g02740:downstream_gene_variant:-:-:-:-:-, Macma4_01_g02750:downstream_gene_variant:-:-:-:-:-
chr01	1796573	T	G	L1-2-1-2-1	PHL10	1	Macma4_01_g02740:upstream_gene_variant:-:-:-:-:-, Macma4_01_g02750:downstream_gene_variant:-:-:-:-:-, Macma4_01_g02760:upstream_gene_variant:-:-:-:-:-
chr01	1799813	T	A	L2-1-2-1-1-1-1-1-1-1-1-1-2	KOR03,KOR04	2	Macma4_01_g02740:upstream_gene_variant:-:-:-:-:-, Macma4_01_g02750:upstream_gene_variant:-:-:-:-:-, Macma4_01_g02760:upstream_gene_variant:-:-:-:-:-
chr01	1800965	T	A	L1-2-2-2-2-2-3-1-1	CHN03	1	Macma4_01_g02750:upstream_gene_variant:-:-:-:-:-, Macma4_01_g02760:upstream_gene_variant:-:-:-:-:-, Macma4_01_g02770:upstream_gene_variant:-:-:-:-:-
chr01	1801552	C	G	L1-2-1-2-1	PHL10	1	Macma4_01_g02750:upstream_gene_variant:-:-:-:-:-, Macma4_01_g02760:missense_variant:462:396:132:F/L:ttC/ttG, Macma4_01_g02770:upstream_gene_variant:-:-:-:-:-, Macma4_01_g02780:upstream_gene_variant:-:-:-:-:-
chr01	1805438	A	G	L2-2-2-1-1	UKN02	1	Macma4_01_g02760:downstream_gene_variant:-:-:-:-:-, Macma4_01_g02770:missense_variant:491:412:138:S/G:Agc/Ggc, Macma4_01_g02780:upstream_gene_variant:-:-:-:-:-
chr01	1805517	C	T	L1-2-1-2-1	PHL10	1	Macma4_01_g02760:downstream_gene_variant:-:-:-:-:-, Macma4_01_g02770:missense_variant:570:491:164:P/L:cCc/cTc, Macma4_01_g02780:upstream_gene_variant:-:-:-:-:-
chr01	1805681	G	T	L1-2-1-2-1	PHL10	1	Macma4_01_g02760:downstream_gene_variant:-:-:-:-:-, Macma4_01_g02770:missense_variant:734:655:219:V/L:Gtg/Ttg, Macma4_01_g02780:upstream_gene_variant:-:-:-:-:-
chr01	1805782	G	T	L2	AUS01,AUS02,AUS03,AUS04,AUS05,AUS06,AUS07,AUS08,AUS09,AUS10,CMR01,CMR02,ES-CN01,ES-CN02,ES-CN03,ES-CN04,ES-CN05,ES-CN06,ES-CN07,ES-CN08,ES-CN09,ES-CN10,ES-CN11,ES-CN12,ES-CN13,ES-CN14,ES-CN15,ES-CN16,ES-CN17,ES-CN18,ES-CN19,ES-CN20,ES-CN21,ES-CN22,ES-CN23,ES-CN24,ES-CN25,ES-CN26,ES-CN27,ES-CN28,ES-CN29,ES-CN30,ES-CN31,ES-CN32,COL01,COL02,COL03,COL04,COL05,COL06,COL07,CRI01,CRI02,CRI03,CRI04,CRI05…	115	Macma4_01_g02760:downstream_gene_variant:-:-:-:-:-, Macma4_01_g02770:synonymous_variant:835:756:252:G:ggG/ggT, Macma4_01_g02780:upstream_gene_variant:-:-:-:-:-
chr01	1808670	G	T	L2-1-1-1-1-2-2	COL03,GLP02	2	Macma4_01_g02770:downstream_gene_variant:-:-:-:-:-, Macma4_01_g02780:synonymous_variant:1411:813:271:A:gcG/gcT, Macma4_01_g02790:downstream_gene_variant:-:-:-:-:-
chr01	1810832	TAGA	T	L2-1-2-1-1-1-1-1-1-1-1-2-1-1-1-2	ECU07	1	Macma4_01_g02770:downstream_gene_variant:-:-:-:-:-, Macma4_01_g02780:downstream_gene_variant:-:-:-:-:-, Macma4_01_g02790:downstream_gene_variant:-:-:-:-:-, Macma4_01_g02800:downstream_gene_variant:-:-:-:-:-
chr01	1811600	C	T	L2-1-2-1-1-1-1-1-1-1-1-1-1-1-1-1-2	COL07	1	Macma4_01_g02780:downstream_gene_variant:-:-:-:-:-, Macma4_01_g02790:downstream_gene_variant:-:-:-:-:-, Macma4_01_g02800:downstream_gene_variant:-:-:-:-:-
chr01	1815288	T	A	L2-1-2-1-1-1-1-1-1-1-1-1-1-1-1-2-2-2	CRI05	1	Macma4_01_g02790:upstream_gene_variant:-:-:-:-:-, Macma4_01_g02800:3_prime_UTR_variant:621:-:-:-:-, Macma4_01_g02810:downstream_gene_variant:-:-:-:-:-, Macma4_01_g02820:downstream_gene_variant:-:-:-:-:-
chr01	1815466	T	C	L2-1-1-1-1-3-2-2	AUS01,AUS02,AUS03,AUS04,AUS05,AUS06,AUS07,AUS08,AUS10,CMR01,CMR02,ES-CN21,ES-CN22,COL05,DOM03,ECU01,ECU08,GHA03,KOR02,KOR05,NIC01,PHL07,PHL08	23	Macma4_01_g02790:upstream_gene_variant:-:-:-:-:-, Macma4_01_g02800:intron_variant:-:-:-:-:-, Macma4_01_g02810:downstream_gene_variant:-:-:-:-:-, Macma4_01_g02820:downstream_gene_variant:-:-:-:-:-
chr01	1816012	G	T	L1-2-1-1	KOR01	1	Macma4_01_g02790:upstream_gene_variant:-:-:-:-:-, Macma4_01_g02800:stop_gained:218:30:10:C/*:tgC/tgA, Macma4_01_g02810:downstream_gene_variant:-:-:-:-:-, Macma4_01_g02820:downstream_gene_variant:-:-:-:-:-
chr01	1820603	G	A	L1-2-2-2-2-2-2-2-2-2	VNM07	1	Macma4_01_g02800:upstream_gene_variant:-:-:-:-:-, Macma4_01_g02810:intron_variant:-:-:-:-:-, Macma4_01_g02820:upstream_gene_variant:-:-:-:-:-, Macma4_01_g02830:downstream_gene_variant:-:-:-:-:-
chr01	1821003	G	C	L2-1-2-1-1-1-1-1-1-2-2	PHL09	1	Macma4_01_g02800:upstream_gene_variant:-:-:-:-:-, Macma4_01_g02810:upstream_gene_variant:-:-:-:-:-, Macma4_01_g02820:upstream_gene_variant:-:-:-:-:-, Macma4_01_g02830:downstream_gene_variant:-:-:-:-:-
chr01	1822385	C	T	L2-1-2-1-1-1-1-1-1-1-1-1-1-1-1-1-2	COL07	1	Macma4_01_g02810:upstream_gene_variant:-:-:-:-:-, Macma4_01_g02820:upstream_gene_variant:-:-:-:-:-, Macma4_01_g02830:missense_variant:257:257:86:G/E:gGa/gAa, Macma4_01_g02840:upstream_gene_variant:-:-:-:-:-
chr01	1832395	A	G	L2-1-2-1-1-1-1-1-1-1-1-1-1-1-1-1-1-1-2	CRI09	1	Macma4_01_g02840:intron_variant:-:-:-:-:-
chr01	1832520	A	C	L2-1-2-2-2	PER01	1	Macma4_01_g02840:intron_variant:-:-:-:-:-
chr01	1833938	A	T	L2-1-1-1-1-3-2-2-2-2-3-2-2-2-2-1	CMR01	1	Macma4_01_g02840:intron_variant:-:-:-:-:-
chr01	1837386	G	C	L2-1-2-1-1-1-1-1-1-1-1-1-1-1-1-2-2-2	CRI05	1	Macma4_01_g02840:intron_variant:-:-:-:-:-
chr01	1847312	A	T	L2-1-1-1-1-3-2-2-2-2-2-2-1	AUS08	1	Macma4_01_g02840:intron_variant:-:-:-:-:-
chr01	1847968	T	C	L1-2-2-2-2-2-3-2-1-2	CHN02	1	Macma4_01_g02840:synonymous_variant:2472:2322:774:G:ggT/ggC
chr01	1849575	T	A	L1-2-2-2-2-2-1	CHN01	1	Macma4_01_g02840:intron_variant:-:-:-:-:-
chr01	1850397	C	A	L2-1-1-1-1-3-2-2-2-2-3-2-1-1	DOM03	1	Macma4_01_g02840:intron_variant:-:-:-:-:-
chr01	1851420	G	A	L1-2-2-2-1	VNM04	1	Macma4_01_g02840:missense_variant:3307:3157:1053:V/I:Gtc/Atc
chr01	1855286	G	A	L1-1	KOR06	1	Macma4_01_g02840:missense_variant:5642:5492:1831:R/H:cGt/cAt, Macma4_01_g02850:downstream_gene_variant:-:-:-:-:-
chr01	1857995	CA	C	L1-2-2-2-2-2-2-2-1	VNM10	1	Macma4_01_g02840:downstream_gene_variant:-:-:-:-:-, Macma4_01_g02850:upstream_gene_variant:-:-:-:-:-, Macma4_01_g02860:upstream_gene_variant:-:-:-:-:-
chr01	1861176	G	C	L1-2-2-2-2-2-3-2-2-2-2-1	TH-KOR07	1	Macma4_01_g02840:downstream_gene_variant:-:-:-:-:-, Macma4_01_g02850:upstream_gene_variant:-:-:-:-:-, Macma4_01_g02860:upstream_gene_variant:-:-:-:-:-
chr01	1867035	C	A	L2-1-1-1-1-3-2-2-2-2-3-2-2-2-2-1	CMR01	1	Macma4_01_g02860:downstream_gene_variant:-:-:-:-:-
chr01	1867647	T	G	L2-2-1-1-1-1-2	ECU04	1	Macma4_01_g02860:downstream_gene_variant:-:-:-:-:-, Macma4_01_g02870:upstream_gene_variant:-:-:-:-:-
chr01	1870224	C	A	L2-1-1-1-1-3-2-2-2-2-3-1	COL05	1	Macma4_01_g02870:upstream_gene_variant:-:-:-:-:-
chr01	1878010	A	C	L2-1-2-1-1-1-1-1-1-1-1-1-1-1-1-2-2-2	CRI05	1	Macma4_01_g02870:downstream_gene_variant:-:-:-:-:-, Macma4_01_g02880:missense_variant:3099:2878:960:L/V:Ttg/Gtg
chr01	1885666	C	T	L1-2-1-2-1	PHL10	1	Macma4_01_g02880:missense_variant:252:31:11:D/N:Gat/Aat
chr01	1889109	T	A	L2-1-2-1-1-1-1-1-1-2-1	PAN01	1	Macma4_01_g02880:upstream_gene_variant:-:-:-:-:-, Macma4_01_g02890:upstream_gene_variant:-:-:-:-:-
chr01	1890551	G	T	L2-1-1-1-1-3-2-2-2-2-3-1	COL05	1	Macma4_01_g02880:upstream_gene_variant:-:-:-:-:-, Macma4_01_g02890:upstream_gene_variant:-:-:-:-:-
chr01	1892535	C	T	L2-1-2-1-1-1-1-1-1-1-1-1-1-1-1-2-2-2	CRI05	1	Macma4_01_g02890:missense_variant:230:230:77:T/M:aCg/aTg
chr01	1899473	A	C	L2-1-2-1-1-1-1-1-1-1-1-2-1-1	ECU06,ECU07,ECU09	3	Macma4_01_g02890:synonymous_variant:1414:1414:472:R:Aga/Cga, Macma4_01_g02900:upstream_gene_variant:-:-:-:-:-, Macma4_01_g02910:downstream_gene_variant:-:-:-:-:-, Macma4_01_g02930:upstream_gene_variant:-:-:-:-:-
chr01	1903300	GTACAGCT	G	L1-2-2-2-2-2-3-2-1	CHN02,VNM05	2	Macma4_01_g02890:downstream_gene_variant:-:-:-:-:-, Macma4_01_g02900:downstream_gene_variant:-:-:-:-:-, Macma4_01_g02910:upstream_gene_variant:-:-:-:-:-, Macma4_01_g02930:intron_variant:-:-:-:-:-
chr01	1919332	G	C	L2-1-2-1-1-1-1-1-1-1-1-2-1-1-1-2	ECU07	1	Macma4_01_g02940:downstream_gene_variant:-:-:-:-:-, Macma4_01_g02950:5_prime_UTR_variant:6:-:-:-:-
chr01	1919333	G	A	L2-1-2-1-1-1-1-1-1-1-1-2-1-1-1-2	ECU07	1	Macma4_01_g02940:downstream_gene_variant:-:-:-:-:-, Macma4_01_g02950:5_prime_UTR_variant:7:-:-:-:-
chr01	1926222	T	A	L1-2-2-2-2-2-3-2-2-2-1	TH-KOR06,TH-KOR08	2	Macma4_01_g02950:downstream_gene_variant:-:-:-:-:-, Macma4_01_g02960:intron_variant:-:-:-:-:-
chr01	1940403	G	A	L2-1-1-1-2-2-2	ECU05	1	Macma4_01_g02970:upstream_gene_variant:-:-:-:-:-, Macma4_01_g02980:downstream_gene_variant:-:-:-:-:-, Macma4_01_g02990:synonymous_variant:1290:1290:430:L:ctC/ctT, Macma4_01_g03000:upstream_gene_variant:-:-:-:-:-
chr01	1941415	G	T	L2-1-2-2-1-1-1	PER05	1	Macma4_01_g02970:upstream_gene_variant:-:-:-:-:-, Macma4_01_g02980:downstream_gene_variant:-:-:-:-:-, Macma4_01_g02990:missense_variant:278:278:93:P/H:cCt/cAt, Macma4_01_g03000:upstream_gene_variant:-:-:-:-:-
chr01	1942825	T	C	L2-1-1-1-1-3-2-2-2-2-3-2-2-2-1	CMR02	1	Macma4_01_g02970:upstream_gene_variant:-:-:-:-:-, Macma4_01_g02980:downstream_gene_variant:-:-:-:-:-, Macma4_01_g02990:upstream_gene_variant:-:-:-:-:-, Macma4_01_g03000:splice_region_variant,splice_polypyrimidine_tract_variant,intron_variant:-:-:-:-:-
chr01	1944474	G	T	L1-2-2-2-2-2-3-2-2	TH-KOR01,TH-KOR02,TH-KOR03,TH-KOR04,TH-KOR05,TH-KOR06,TH-KOR07,TH-KOR08	8	Macma4_01_g02990:upstream_gene_variant:-:-:-:-:-, Macma4_01_g03000:downstream_gene_variant:-:-:-:-:-, Macma4_01_g03010:downstream_gene_variant:-:-:-:-:-
chr01	1944539	C	T	L1-2-1-2-1	PHL10	1	Macma4_01_g02990:upstream_gene_variant:-:-:-:-:-, Macma4_01_g03000:downstream_gene_variant:-:-:-:-:-, Macma4_01_g03010:downstream_gene_variant:-:-:-:-:-
chr01	1950465	G	A	L2-1-2-1-1-1-1-1-1-1-1-1-1-1-1-2-1	ES-CN25,ES-CN26	2	Macma4_01_g03010:upstream_gene_variant:-:-:-:-:-, Macma4_01_g03020:downstream_gene_variant:-:-:-:-:-
chr01	1954261	A	T	L2-1-1-1-1-1-2-3-2-2	ES-CN10	1	Macma4_01_g03020:intron_variant:-:-:-:-:-, Macma4_01_g03030:upstream_gene_variant:-:-:-:-:-, Macma4_01_g03040:downstream_gene_variant:-:-:-:-:-
chr01	1955740	G	A	L1-2-1-2-2-1	VNM09	1	Macma4_01_g03020:missense_variant:252:217:73:R/W:Cgg/Tgg, Macma4_01_g03030:upstream_gene_variant:-:-:-:-:-, Macma4_01_g03040:downstream_gene_variant:-:-:-:-:-
chr01	1960429	A	AC	L2-1-2-2-1-2-1	ECU10	1	Macma4_01_g03020:upstream_gene_variant:-:-:-:-:-, Macma4_01_g03030:downstream_gene_variant:-:-:-:-:-, Macma4_01_g03040:intron_variant:-:-:-:-:-
chr01	1960430	A	T	L2-1-2-2-1-2-1	ECU10	1	Macma4_01_g03020:upstream_gene_variant:-:-:-:-:-, Macma4_01_g03030:downstream_gene_variant:-:-:-:-:-, Macma4_01_g03040:intron_variant:-:-:-:-:-
chr01	1963713	AT	A	L2-1-2-1-1-1-1-1-1-1-1-1-1-1-1-2-1	ES-CN25,ES-CN26	2	Macma4_01_g03040:intron_variant:-:-:-:-:-
chr01	1966454	G	C	L1-2-1-2-2-2-1	PHL05	1	Macma4_01_g03040:upstream_gene_variant:-:-:-:-:-, Macma4_01_g03050:downstream_gene_variant:-:-:-:-:-
chr01	1967334	G	A	L1-2-1-2-1	PHL10	1	Macma4_01_g03040:upstream_gene_variant:-:-:-:-:-, Macma4_01_g03050:downstream_gene_variant:-:-:-:-:-
chr01	1972421	G	T	L2-1-2-1-1-1-1-1-1-1-1-2-1-1-1-2	ECU07	1	Macma4_01_g03050:upstream_gene_variant:-:-:-:-:-, Macma4_01_g03060:upstream_gene_variant:-:-:-:-:-
chr01	1976397	G	T	L1-2-2-2-2-2-3-2-2-2-1	TH-KOR06,TH-KOR08	2	Macma4_01_g03050:upstream_gene_variant:-:-:-:-:-, Macma4_01_g03060:downstream_gene_variant:-:-:-:-:-, Macma4_01_g03070:downstream_gene_variant:-:-:-:-:-
chr01	1982746	T	A	L1-2-2-2-2-2-2-1-2-1	VNM03	1	Macma4_01_g03070:upstream_gene_variant:-:-:-:-:-, Macma4_01_g03080:downstream_gene_variant:-:-:-:-:-, Macma4_01_g03090:upstream_gene_variant:-:-:-:-:-
chr01	1992362	C	T	L1-2-2-2-2-2-3-2-2-2-1	TH-KOR06,TH-KOR08	2	Macma4_01_g03090:downstream_gene_variant:-:-:-:-:-, Macma4_01_g03100:downstream_gene_variant:-:-:-:-:-, Macma4_01_g03110:missense_variant:380:380:127:R/Q:cGg/cAg, Macma4_01_g03120:downstream_gene_variant:-:-:-:-:-, Macma4_01_g03130:downstream_gene_variant:-:-:-:-:-
chr01	1995708	C	A	L2-1-1-1-1-3-2-2-1-1-2-1	PHL07	1	Macma4_01_g03100:downstream_gene_variant:-:-:-:-:-, Macma4_01_g03110:upstream_gene_variant:-:-:-:-:-, Macma4_01_g03120:upstream_gene_variant:-:-:-:-:-, Macma4_01_g03130:downstream_gene_variant:-:-:-:-:-
chr01	2017893	T	C	L1-2-2-2-2-1	VNM06	1	Macma4_01_g03140:downstream_gene_variant:-:-:-:-:-, Macma4_01_g03150:3_prime_UTR_variant:2225:-:-:-:-
chr01	2020180	T	A	L2-1-1-1-1-3-2-2-2-2-2-2-2	AUS05	1	Macma4_01_g03140:downstream_gene_variant:-:-:-:-:-, Macma4_01_g03150:missense_variant:1055:1055:352:D/V:gAt/gTt
chr01	2028711	C	T	L2-1-2-1-1-1-1-1-1-1-1-1-2-2	KOR03	1	Macma4_01_g03160:intron_variant:-:-:-:-:-, Macma4_01_g03180:upstream_gene_variant:-:-:-:-:-, Macma4_01_g03190:upstream_gene_variant:-:-:-:-:-, Macma4_01_g03200:upstream_gene_variant:-:-:-:-:-
chr01	2030645	G	A	L2-1-2-1-1-1-1-1-1-1-1-1-1-1-1-2-1-1	ES-CN26	1	Macma4_01_g03160:downstream_gene_variant:-:-:-:-:-, Macma4_01_g03170:upstream_gene_variant:-:-:-:-:-, Macma4_01_g03180:upstream_gene_variant:-:-:-:-:-, Macma4_01_g03190:upstream_gene_variant:-:-:-:-:-, Macma4_01_g03200:upstream_gene_variant:-:-:-:-:-
chr01	2040090	C	T	L1-2-2-1	PHL01	1	Macma4_01_g03170:downstream_gene_variant:-:-:-:-:-, Macma4_01_g03210:missense_variant:537:529:177:A/T:Gct/Act, Macma4_01_g03220:downstream_gene_variant:-:-:-:-:-
chr01	2040182	G	A	L2-1-2-1-1-1-1-1-1-2-2	PHL09	1	Macma4_01_g03170:downstream_gene_variant:-:-:-:-:-, Macma4_01_g03210:missense_variant:445:437:146:A/V:gCc/gTc, Macma4_01_g03220:downstream_gene_variant:-:-:-:-:-
chr01	2043574	T	G	L2-1-1-1-1-1-1	ENG01,ENG02,ENG04,ENG05,ENG03	5	Macma4_01_g03210:upstream_gene_variant:-:-:-:-:-, Macma4_01_g03220:missense_variant:871:871:291:N/H:Aac/Cac, Macma4_01_g03230:downstream_gene_variant:-:-:-:-:-
chr01	2045541	C	A	L2-1-2-1-1-1-1-1-1-1-1-2-1-1	ECU06,ECU07,ECU09	3	Macma4_01_g03210:upstream_gene_variant:-:-:-:-:-, Macma4_01_g03220:upstream_gene_variant:-:-:-:-:-, Macma4_01_g03230:downstream_gene_variant:-:-:-:-:-
chr01	2046887	G	T	L2-1-2-1-1-1-1-1-1-1-1-1-1	ES-CN25,ES-CN26,ES-CN31,ES-CN32,COL07,CRI03,CRI04,CRI05,CRI09,CRI10,ECU02,ECU03,GLP01,NIC02	14	Macma4_01_g03220:upstream_gene_variant:-:-:-:-:-, Macma4_01_g03230:intron_variant:-:-:-:-:-
chr01	2048336	C	T	L2-1-2-1-1-1-1-1-1-1-1-1-2-1	KOR04	1	Macma4_01_g03220:upstream_gene_variant:-:-:-:-:-, Macma4_01_g03230:synonymous_variant:1482:1296:432:P:ccG/ccA
chr01	2054504	T	A	L1-2-2-2-1	VNM04	1	Macma4_01_g03230:intron_variant:-:-:-:-:-
chr01	2059672	T	G	L1-2-2-2-2-2-2-2	CHN05,VNM10,VNM07	3	Macma4_01_g03230:intron_variant:-:-:-:-:-
chr01	2063335	C	T	L2-1-2-1-1-1-1-1-2	CRI02,CRI08	2	Macma4_01_g03230:intron_variant:-:-:-:-:-
chr01	2070412	T	A	L1-2-1-1	KOR01	1	Macma4_01_g03230:intron_variant:-:-:-:-:-, Macma4_01_g03240:downstream_gene_variant:-:-:-:-:-
chr01	2079138	G	T	L2-1-1-1-1-3-2-2-2-2-2-1-2	AUS06	1	Macma4_01_g03240:upstream_gene_variant:-:-:-:-:-, Macma4_01_g03250:upstream_gene_variant:-:-:-:-:-
chr01	2079421	C	A	L2-1-2-3	DOM04	1	Macma4_01_g03240:upstream_gene_variant:-:-:-:-:-, Macma4_01_g03250:5_prime_UTR_variant:26:-:-:-:-
chr01	2079960	T	C	L2-1-1-1-1-3-2-2-2-2-3-2-2-1	ECU08	1	Macma4_01_g03240:upstream_gene_variant:-:-:-:-:-, Macma4_01_g03250:intron_variant:-:-:-:-:-
chr01	2099914	T	A	L1-2-2-2-2-2-2-1-1	VNM01	1	Macma4_01_g03290:missense_variant:137:137:46:K/M:aAg/aTg, Macma4_01_g03300:upstream_gene_variant:-:-:-:-:-, Macma4_01_g03310:downstream_gene_variant:-:-:-:-:-
chr01	2108346	T	G	L2-1-1-1-1-3-2-2-2-2-2-2-3-1	AUS10	1	Macma4_01_g03310:upstream_gene_variant:-:-:-:-:-, Macma4_01_g03320:intron_variant:-:-:-:-:-, Macma4_01_g03330:downstream_gene_variant:-:-:-:-:-
chr01	2122445	T	G	L1-2-2-2-2-2-3-2-1-1	VNM05	1	Macma4_01_g03330:upstream_gene_variant:-:-:-:-:-, Macma4_01_g03340:upstream_gene_variant:-:-:-:-:-
chr01	2123440	C	A	L2-1-1-1-1-3-2-2-2-2-3-1	COL05	1	Macma4_01_g03330:upstream_gene_variant:-:-:-:-:-, Macma4_01_g03340:upstream_gene_variant:-:-:-:-:-
chr01	2126479	G	A	L2-1-1-1-1-2-2	COL03,GLP02	2	Macma4_01_g03340:intron_variant:-:-:-:-:-, Macma4_01_g03350:downstream_gene_variant:-:-:-:-:-
chr01	2131972	T	A	L2-2-1-1	COL01,COL06,CRI06,ECU04,PER03	5	Macma4_01_g03340:downstream_gene_variant:-:-:-:-:-, Macma4_01_g03350:intron_variant:-:-:-:-:-, Macma4_01_g03360:downstream_gene_variant:-:-:-:-:-
chr01	2147146	T	A	L1-2-1-2-2-2	PHL02,PHL05,PHL06	3	Macma4_01_g03370:missense_variant:1468:1468:490:S/T:Tcc/Acc, Macma4_01_g03380:downstream_gene_variant:-:-:-:-:-
chr01	2158427	C	T	L2	AUS01,AUS02,AUS03,AUS04,AUS05,AUS06,AUS07,AUS08,AUS09,AUS10,CMR01,CMR02,ES-CN01,ES-CN02,ES-CN03,ES-CN04,ES-CN05,ES-CN06,ES-CN07,ES-CN08,ES-CN09,ES-CN10,ES-CN11,ES-CN12,ES-CN13,ES-CN14,ES-CN15,ES-CN16,ES-CN17,ES-CN18,ES-CN19,ES-CN20,ES-CN21,ES-CN22,ES-CN23,ES-CN24,ES-CN25,ES-CN26,ES-CN27,ES-CN28,ES-CN29,ES-CN30,ES-CN31,ES-CN32,COL01,COL02,COL03,COL04,COL05,COL06,COL07,CRI01,CRI02,CRI03,CRI04,CRI05…	115	Macma4_01_g03390:upstream_gene_variant:-:-:-:-:-
chr01	2158624	G	A	L2-1-1-1-1-3-2-2-2-2-3-2-2-2-2-2	GHA03	1	Macma4_01_g03390:upstream_gene_variant:-:-:-:-:-
chr01	2161158	C	T	L2-1-2-1-1-1-1-1-1-1-1-2-2-1-1	GLP03	1	Macma4_01_g03390:missense_variant:619:296:99:A/V:gCg/gTg, Macma4_01_g03400:downstream_gene_variant:-:-:-:-:-
chr01	2164334	C	T	L2-1-1-1-1-3-1	AUS09	1	Macma4_01_g03390:downstream_gene_variant:-:-:-:-:-, Macma4_01_g03400:synonymous_variant:195:195:65:A:gcG/gcA, Macma4_01_g03410:upstream_gene_variant:-:-:-:-:-
chr01	2171901	C	G	L2-1-1-1-2-2-1	CRI07	1	Macma4_01_g03410:intron_variant:-:-:-:-:-
chr01	2173004	A	G	L2-2-1-1-1-3	COL01	1	Macma4_01_g03410:intron_variant:-:-:-:-:-
chr01	2174643	TG	T	L2-1-2-1-1-1-3-2	GHA01	1	Macma4_01_g03410:intron_variant:-:-:-:-:-
chr01	2197200	C	A	L2-1-1-1-1-3-2-2-1-2-2-1	ES-CN21	1	Macma4_01_g03440:intron_variant:-:-:-:-:-
chr01	2205165	A	G	L2-1-2-1-1-1-1-1-1-1-1-2-1-1	ECU06,ECU07,ECU09	3	Macma4_01_g03440:downstream_gene_variant:-:-:-:-:-, Macma4_01_g03450:missense_variant:973:539:180:L/P:cTg/cCg
chr01	2206424	A	G	L1-2-2-2-2	CHN01,CHN02,CHN03,CHN04,CHN05,VNM10,TH-KOR01,TH-KOR02,TH-KOR03,TH-KOR04,TH-KOR05,TH-KOR06,TH-KOR07,TH-KOR08,VNM01,VNM03,VNM02,VNM05,VNM06,VNM07	20	Macma4_01_g03450:upstream_gene_variant:-:-:-:-:-
chr01	2224643	A	T	L2-1-1-1-1-3-2-2-2-2-3-1	COL05	1	Macma4_01_g03470:upstream_gene_variant:-:-:-:-:-, Macma4_01_g03480:downstream_gene_variant:-:-:-:-:-
chr01	2241053	G	T	L2-1-2-1-1-1-1-2	MEX02	1	Macma4_01_g03490:missense_variant:1245:1183:395:D/Y:Gat/Tat, Macma4_01_g03500:downstream_gene_variant:-:-:-:-:-
chr01	2242007	G	A	L2-1-2-1-1-1-1-2	MEX02	1	Macma4_01_g03490:missense_variant:2023:1961:654:G/E:gGa/gAa, Macma4_01_g03500:downstream_gene_variant:-:-:-:-:-
chr01	2253348	C	A	L2-1-2-1-1-1-1-1-1-1-3	HND01	1	Macma4_01_g03500:upstream_gene_variant:-:-:-:-:-, Macma4_01_g03510:intron_variant:-:-:-:-:-
chr01	2253968	G	T	L2-1-1-1-1-3-2-2-2-2-2-1-1	AUS01	1	Macma4_01_g03500:upstream_gene_variant:-:-:-:-:-, Macma4_01_g03510:intron_variant:-:-:-:-:-
chr01	2264016	G	A	L2-1-2-1-1-1-1-2	MEX02	1	Macma4_01_g03520:upstream_gene_variant:-:-:-:-:-, Macma4_01_g03530:upstream_gene_variant:-:-:-:-:-, Macma4_01_g03540:upstream_gene_variant:-:-:-:-:-
chr01	2264613	G	T	L2-1-1-1-1-3-2-2-2-2-3-2-2	CMR01,CMR02,ECU08,GHA03	4	Macma4_01_g03520:upstream_gene_variant:-:-:-:-:-, Macma4_01_g03530:intron_variant:-:-:-:-:-, Macma4_01_g03540:upstream_gene_variant:-:-:-:-:-
chr01	2266915	G	A	L2	AUS01,AUS02,AUS03,AUS04,AUS05,AUS06,AUS07,AUS08,AUS09,AUS10,CMR01,CMR02,ES-CN01,ES-CN02,ES-CN03,ES-CN04,ES-CN05,ES-CN06,ES-CN07,ES-CN08,ES-CN09,ES-CN10,ES-CN11,ES-CN12,ES-CN13,ES-CN14,ES-CN15,ES-CN16,ES-CN17,ES-CN18,ES-CN19,ES-CN20,ES-CN21,ES-CN22,ES-CN23,ES-CN24,ES-CN25,ES-CN26,ES-CN27,ES-CN28,ES-CN29,ES-CN30,ES-CN31,ES-CN32,COL01,COL02,COL03,COL04,COL05,COL06,COL07,CRI01,CRI02,CRI03,CRI04,CRI05…	115	Macma4_01_g03530:downstream_gene_variant:-:-:-:-:-, Macma4_01_g03540:upstream_gene_variant:-:-:-:-:-
chr01	2275734	C	T	L1-2-2-2-2-2-2-2-1	VNM10	1	Macma4_01_g03550:intron_variant:-:-:-:-:-, Macma4_01_g03560:upstream_gene_variant:-:-:-:-:-
chr01	2278016	T	G	L1-2-2-2-2-2-2-2-2-2	VNM07	1	Macma4_01_g03550:upstream_gene_variant:-:-:-:-:-, Macma4_01_g03560:5_prime_UTR_variant:13:-:-:-:-
chr01	2282281	T	G	L2-1-1-1-1-2-2-2	GLP02	1	Macma4_01_g03550:upstream_gene_variant:-:-:-:-:-, Macma4_01_g03560:downstream_gene_variant:-:-:-:-:-, Macma4_01_g03570:upstream_gene_variant:-:-:-:-:-
chr01	2282772	A	G	L1-2-2-2-2-2-2-2-2-2	VNM07	1	Macma4_01_g03550:upstream_gene_variant:-:-:-:-:-, Macma4_01_g03560:downstream_gene_variant:-:-:-:-:-, Macma4_01_g03570:upstream_gene_variant:-:-:-:-:-
chr01	2293605	G	GT	L2-1-1-1-1-3-2-2-2-2-3-2-1-2	KOR02,KOR05	2	Macma4_01_g03580:upstream_gene_variant:-:-:-:-:-, Macma4_01_g03590:frameshift_variant:122-123:122-123:41:S/SX:agt/agTt, Macma4_01_g03600:upstream_gene_variant:-:-:-:-:-
chr01	2294394	G	A	L2-1-2-1-1-1-1-1-1-1-1-2-2-1-2	ES-CN19	1	Macma4_01_g03580:upstream_gene_variant:-:-:-:-:-, Macma4_01_g03590:missense_variant:911:911:304:R/Q:cGg/cAg, Macma4_01_g03600:upstream_gene_variant:-:-:-:-:-
chr01	2299775	C	A	L2-1-2-1-1-1-2-1-1	ES-CN29	1	Macma4_01_g03600:intron_variant:-:-:-:-:-, Macma4_01_g03610:upstream_gene_variant:-:-:-:-:-
chr01	2306534	AG	A	L2-1-1-1-1-3-2-2-2-2-3-2-1-1	DOM03	1	Macma4_01_g03600:downstream_gene_variant:-:-:-:-:-, Macma4_01_g03610:intron_variant:-:-:-:-:-
chr01	2314149	C	G	L1-2-2-2-2-2-2-1-1	VNM01	1	Macma4_01_g03610:downstream_gene_variant:-:-:-:-:-, Macma4_01_g03620:missense_variant:498:466:156:R/G:Cgg/Ggg, Macma4_01_g03630:downstream_gene_variant:-:-:-:-:-
chr01	2317608	A	C	L2-1-2-1-1-1-1-1-1-1-1-1-1-1-1-2-2-1	ES-CN31	1	Macma4_01_g03620:downstream_gene_variant:-:-:-:-:-, Macma4_01_g03630:intron_variant:-:-:-:-:-, Macma4_01_g03640:downstream_gene_variant:-:-:-:-:-
chr01	2319261	A	G	L2-1-2-1-1-1-1-1-1-1-1-1-1-1-1-2-1-1	ES-CN26	1	Macma4_01_g03620:downstream_gene_variant:-:-:-:-:-, Macma4_01_g03630:intron_variant:-:-:-:-:-, Macma4_01_g03640:downstream_gene_variant:-:-:-:-:-
chr01	2325997	C	T	L2-1-2-1-1-1-1-1-1-1-1-1-1-1-1-2-1	ES-CN25,ES-CN26	2	Macma4_01_g03640:upstream_gene_variant:-:-:-:-:-, Macma4_01_g03650:upstream_gene_variant:-:-:-:-:-, Macma4_01_g03660:upstream_gene_variant:-:-:-:-:-
chr01	2327797	A	T	L2-1-2-1-1-1-1-1-1-1-1-2-1-3	HND02	1	Macma4_01_g03640:upstream_gene_variant:-:-:-:-:-, Macma4_01_g03650:intron_variant:-:-:-:-:-, Macma4_01_g03660:upstream_gene_variant:-:-:-:-:-
chr01	2330804	C	T	L2-1-2-1-1-1-1-1-1-1-1-1-2	KOR03,KOR04	2	Macma4_01_g03650:downstream_gene_variant:-:-:-:-:-, Macma4_01_g03660:synonymous_variant:232:27:9:G:ggC/ggT, Macma4_01_g03670:downstream_gene_variant:-:-:-:-:-
chr01	2335603	T	C	L2-1-2-1-1-1-1-1-2-2	CRI02	1	Macma4_01_g03660:downstream_gene_variant:-:-:-:-:-, Macma4_01_g03670:missense_variant:2882:2213:738:D/G:gAt/gGt
chr01	2350445	TCTGCTGCTGCTGCTGCTGCTG	T	L2-1-2-1-1-1-1-1-1-1-1-1-1-1-1-2-1-1	ES-CN26	1	Macma4_01_g03670:inframe_deletion:1192-1212:523-543:175-181:QQQQQQQ/-:CAGCAGCAGCAGCAGCAGCAG/-, Macma4_01_g03680:upstream_gene_variant:-:-:-:-:-
chr01	2360686	C	T	L1-2-1-1	KOR01	1	Macma4_01_g03690:downstream_gene_variant:-:-:-:-:-, Macma4_01_g03700:upstream_gene_variant:-:-:-:-:-
chr01	2371758	A	G	L2-1-2-1-1-1-1-1-1-1-2-2	CRI01	1	Macma4_01_g03700:downstream_gene_variant:-:-:-:-:-, Macma4_01_g03710:upstream_gene_variant:-:-:-:-:-, Macma4_01_g03720:upstream_gene_variant:-:-:-:-:-
chr01	2373697	T	G	L1-2-2-2-2-1	VNM06	1	Macma4_01_g03710:upstream_gene_variant:-:-:-:-:-, Macma4_01_g03720:upstream_gene_variant:-:-:-:-:-, Macma4_01_g03730:downstream_gene_variant:-:-:-:-:-
chr01	2376557	C	T	L2-1-1-1-1-3-2-2-2-2-3-2-2-1	ECU08	1	Macma4_01_g03720:missense_variant:1559:1256:419:S/F:tCt/tTt, Macma4_01_g03730:downstream_gene_variant:-:-:-:-:-
chr01	2383469	G	C	L1-2-2-2-2-2-3-2-2-2-2-1	TH-KOR07	1	Macma4_01_g03740:upstream_gene_variant:-:-:-:-:-, Macma4_01_g03750:downstream_gene_variant:-:-:-:-:-
chr01	2384960	G	A	L2-1-1-1-1-1-1	ENG01,ENG02,ENG04,ENG05,ENG03	5	Macma4_01_g03740:upstream_gene_variant:-:-:-:-:-, Macma4_01_g03750:downstream_gene_variant:-:-:-:-:-
chr01	2390857	G	T	L1-1	KOR06	1	Macma4_01_g03740:downstream_gene_variant:-:-:-:-:-, Macma4_01_g03750:intron_variant:-:-:-:-:-
chr01	2392779	C	T	L2-1-2-1-1-1-1-1-1-1-1-1-2-2	KOR03	1	Macma4_01_g03740:downstream_gene_variant:-:-:-:-:-, Macma4_01_g03750:synonymous_variant:617:573:191:E:gaG/gaA
chr01	2398647	A	T	L1-2-2-2-2-2-1	CHN01	1	Macma4_01_g03760:synonymous_variant:3700:3693:1231:V:gtT/gtA
chr01	2400896	C	T	L2-1-1-1-1-3-2-2-2-2-3-2-2-2-2-1	CMR01	1	Macma4_01_g03760:intron_variant:-:-:-:-:-
chr01	2418235	C	A	L2-1-1-1-1-1-2-5-2-2-1	ES-CN23	1	Macma4_01_g03770:upstream_gene_variant:-:-:-:-:-, Macma4_01_g03780:upstream_gene_variant:-:-:-:-:-
chr01	2423011	A	C	L1-2-2-2-2-1	VNM06	1	Macma4_01_g03780:3_prime_UTR_variant:1537:-:-:-:-, Macma4_01_g03790:downstream_gene_variant:-:-:-:-:-
chr01	2430680	C	T	L1-2-2-2-1	VNM04	1	Macma4_01_g03790:missense_variant,splice_region_variant:1979:1932:644:M/I:atG/atA
chr01	2433234	G	T	L2-1-2-1-1-1-1-1-1-1-1-1-1-2	GLP01	1	Macma4_01_g03790:intron_variant:-:-:-:-:-
chr01	2436335	T	G	L1-2-2-2-2-2-1	CHN01	1	Macma4_01_g03790:intron_variant:-:-:-:-:-
chr01	2447546	C	T	L2-1-2-1-1-1-1-1-1-2-2	PHL09	1	Macma4_01_g03800:synonymous_variant:90:90:30:R:agG/agA, Macma4_01_g03810:downstream_gene_variant:-:-:-:-:-
chr01	2448690	G	T	L2-1-2-1-1-1-1-1-1-1-1-2-2-1-2	ES-CN19	1	Macma4_01_g03800:upstream_gene_variant:-:-:-:-:-, Macma4_01_g03810:missense_variant:1400:1400:467:P/Q:cCa/cAa
chr01	2449213	C	T	L2-1-2-1-1-1-1-1-1-1-1-1-1-1-1-3	ECU02,ECU03	2	Macma4_01_g03800:upstream_gene_variant:-:-:-:-:-, Macma4_01_g03810:missense_variant:1229:1229:410:C/Y:tGt/tAt
chr01	2450409	G	A	L2-1-2-1-1-2-2	ES-CN27	1	Macma4_01_g03800:upstream_gene_variant:-:-:-:-:-, Macma4_01_g03810:intron_variant:-:-:-:-:-
chr01	2466607	G	A	L2-2-1-1-1-3	COL01	1	Macma4_01_g03820:intron_variant:-:-:-:-:-
chr01	2476038	G	A	L1-2-2-2-1	VNM04	1	Macma4_01_g03820:intron_variant:-:-:-:-:-
chr01	2480291	G	A	L2-1-2-1-1-1-1-1-1-1-1-2-1	ECU06,ECU07,ECU09,GHA04,HND02	5	Macma4_01_g03820:downstream_gene_variant:-:-:-:-:-, Macma4_01_g03830:downstream_gene_variant:-:-:-:-:-
chr01	2492839	G	C	L2-1-1-1-1-3-2-2-1-2-2	ES-CN21,ES-CN22	2	Macma4_01_g03840:upstream_gene_variant:-:-:-:-:-, Macma4_01_g03850:upstream_gene_variant:-:-:-:-:-
chr01	2496235	G	T	L1-2-2-2-1	VNM04	1	Macma4_01_g03850:intron_variant:-:-:-:-:-
chr01	2499649	C	A	L2-1-2-1-1-1-2-1-2	GTM03	1	Macma4_01_g03850:intron_variant:-:-:-:-:-, Macma4_01_g03860:upstream_gene_variant:-:-:-:-:-
chr01	2502739	A	C	L2-1-1-1-1-3-2-2-2-2-2-2-2	AUS05	1	Macma4_01_g03850:downstream_gene_variant:-:-:-:-:-, Macma4_01_g03860:upstream_gene_variant:-:-:-:-:-
chr01	2506803	A	C	L1-2-1-1	KOR01	1	Macma4_01_g03850:downstream_gene_variant:-:-:-:-:-, Macma4_01_g03860:downstream_gene_variant:-:-:-:-:-, Macma4_01_g03870:upstream_gene_variant:-:-:-:-:-
chr01	2516117	A	C	L1-2-2-2-2-2-2-2-2-2	VNM07	1	Macma4_01_g03870:intron_variant:-:-:-:-:-, Macma4_01_g03880:downstream_gene_variant:-:-:-:-:-
chr01	2518886	AT	A	L2-1-2-1-1-1-1-2	MEX02	1	Macma4_01_g03870:downstream_gene_variant:-:-:-:-:-, Macma4_01_g03880:downstream_gene_variant:-:-:-:-:-, Macma4_01_g03890:downstream_gene_variant:-:-:-:-:-
chr01	2519362	A	T	L1-2-2-2-2-1	VNM06	1	Macma4_01_g03870:downstream_gene_variant:-:-:-:-:-, Macma4_01_g03880:downstream_gene_variant:-:-:-:-:-, Macma4_01_g03890:downstream_gene_variant:-:-:-:-:-
chr01	2521281	C	A	L2-1-1-1-1-3-2-2-2-2-2-2-2	AUS05	1	Macma4_01_g03870:downstream_gene_variant:-:-:-:-:-, Macma4_01_g03880:upstream_gene_variant:-:-:-:-:-, Macma4_01_g03890:downstream_gene_variant:-:-:-:-:-
chr01	2556456	G	C	L2-1-2-1-1-1-1-1-1-2-1	PAN01	1	Macma4_01_g03940:downstream_gene_variant:-:-:-:-:-, Macma4_01_g03950:downstream_gene_variant:-:-:-:-:-, Macma4_01_g03960:downstream_gene_variant:-:-:-:-:-
chr01	2556783	C	G	L1-2-1-2-2-1	VNM09	1	Macma4_01_g03940:downstream_gene_variant:-:-:-:-:-, Macma4_01_g03950:downstream_gene_variant:-:-:-:-:-, Macma4_01_g03960:downstream_gene_variant:-:-:-:-:-
chr01	2561281	C	T	L1-2-1-2-2-2-1	PHL05	1	Macma4_01_g03950:downstream_gene_variant:-:-:-:-:-, Macma4_01_g03960:intron_variant:-:-:-:-:-, Macma4_01_g03970:downstream_gene_variant:-:-:-:-:-
chr01	2577011	T	C	L2-1-2-1-1-1-1-2	MEX02	1	Macma4_01_g03970:intron_variant:-:-:-:-:-, Macma4_01_g03980:downstream_gene_variant:-:-:-:-:-
chr01	2579092	G	T	L2-1-1-1-1-3-2-2-1-1-1	ECU01	1	Macma4_01_g03970:stop_gained:106:38:13:S/*:tCg/tAg, Macma4_01_g03980:downstream_gene_variant:-:-:-:-:-
chr01	2580377	C	A	L2-1-1-1-1-2-1	ES-CN20	1	Macma4_01_g03970:upstream_gene_variant:-:-:-:-:-, Macma4_01_g03980:missense_variant:886:752:251:R/L:cGc/cTc
chr01	2584858	A	T	L2-1-2-1-1-1-1-1-2-2	CRI02	1	Macma4_01_g03980:intron_variant:-:-:-:-:-, Macma4_01_g03990:upstream_gene_variant:-:-:-:-:-
chr01	2586187	G	T	L1-2-2-2-2-2-3-2-2	TH-KOR01,TH-KOR02,TH-KOR03,TH-KOR04,TH-KOR05,TH-KOR06,TH-KOR07,TH-KOR08	8	Macma4_01_g03980:upstream_gene_variant:-:-:-:-:-, Macma4_01_g03990:upstream_gene_variant:-:-:-:-:-
chr01	2589696	A	G	L2-1-2-1-1-1-1-1-2-2	CRI02	1	Macma4_01_g03980:upstream_gene_variant:-:-:-:-:-, Macma4_01_g03990:upstream_gene_variant:-:-:-:-:-
chr01	2594556	A	G	L2-1-1-1-1-1-2-5-2-3-1	ES-CN08	1	Macma4_01_g03990:missense_variant:965:965:322:Q/R:cAg/cGg, Macma4_01_g04000:downstream_gene_variant:-:-:-:-:-
chr01	2596260	A	T	L2-1-2-1-1-1-1-2	MEX02	1	Macma4_01_g03990:downstream_gene_variant:-:-:-:-:-, Macma4_01_g04000:downstream_gene_variant:-:-:-:-:-
chr01	2604456	T	A	L1-2-2-2-2-2-3-2-1-2	CHN02	1	Macma4_01_g04010:upstream_gene_variant:-:-:-:-:-
chr01	2605389	G	A	L2-2-2-1-2	UKN01	1	Macma4_01_g04010:upstream_gene_variant:-:-:-:-:-
chr01	2606954	T	G	L1-2-1-2-2-2-1	PHL05	1	Macma4_01_g04010:upstream_gene_variant:-:-:-:-:-
chr01	2611420	C	T	L2-1-2-2-1-1-1	PER05	1	Macma4_01_g04010:downstream_gene_variant:-:-:-:-:-, Macma4_01_g04020:upstream_gene_variant:-:-:-:-:-
chr01	2617613	C	A	L2-1-2-1-1-1-1-1-1-1-1-2-1-3	HND02	1	Macma4_01_g04020:missense_variant:763:579:193:F/L:ttC/ttA
chr01	2622437	G	T	L2-2-1-1-1-2	PER03	1	Macma4_01_g04020:downstream_gene_variant:-:-:-:-:-, Macma4_01_g04030:downstream_gene_variant:-:-:-:-:-
chr01	2623468	G	A	L1-2-1-2-2-1	VNM09	1	Macma4_01_g04020:downstream_gene_variant:-:-:-:-:-, Macma4_01_g04030:downstream_gene_variant:-:-:-:-:-
chr01	2623534	C	T	L2-1-2-1-1-1-1-1-1-1-1-2-2-1-1	GLP03	1	Macma4_01_g04020:downstream_gene_variant:-:-:-:-:-, Macma4_01_g04030:downstream_gene_variant:-:-:-:-:-
chr01	2628816	G	C	L2-1-2-2-1-1-2	PER04	1	Macma4_01_g04030:upstream_gene_variant:-:-:-:-:-, Macma4_01_g04040:upstream_gene_variant:-:-:-:-:-
chr01	2631421	C	T	L2-1-2-1-1-1-1-1-1-1-1-2-1-2	GHA04	1	Macma4_01_g04030:upstream_gene_variant:-:-:-:-:-, Macma4_01_g04040:upstream_gene_variant:-:-:-:-:-
chr01	2638773	G	T	L2-1-2-1-1-1-1-1-1-1-1-1-2	KOR03,KOR04	2	Macma4_01_g04040:synonymous_variant:1717:1551:517:L:ctG/ctT
chr01	2641631	A	G	L2-1-1-1-1-3-2-2-1-2-2-2	ES-CN22	1	Macma4_01_g04040:intron_variant:-:-:-:-:-
chr01	2656959	T	A	L2-1-2-1-1-1-1-1-1-1-1-2-1-1-1-1	ECU09	1	Macma4_01_g04050:upstream_gene_variant:-:-:-:-:-, Macma4_01_g04060:downstream_gene_variant:-:-:-:-:-, Macma4_01_g04070:upstream_gene_variant:-:-:-:-:-
chr01	2656960	TA	T	L2-1-2-1-1-1-1-1-1-1-1-2-1-1-1-1	ECU09	1	Macma4_01_g04050:upstream_gene_variant:-:-:-:-:-, Macma4_01_g04060:downstream_gene_variant:-:-:-:-:-, Macma4_01_g04070:upstream_gene_variant:-:-:-:-:-
chr01	2658052	TTC	T	L2-1-1-1-1-3-2-2-2-2-3-2-2-1	ECU08	1	Macma4_01_g04050:upstream_gene_variant:-:-:-:-:-, Macma4_01_g04060:frameshift_variant:1110-1111:1110-1111:370-371:EK/EX:gaGAag/gaag, Macma4_01_g04070:upstream_gene_variant:-:-:-:-:-
chr01	2660665	C	T	L2-1-2-1-1-1-1-1-1-1-1-1-1-1-1-3	ECU02,ECU03	2	Macma4_01_g04050:upstream_gene_variant:-:-:-:-:-, Macma4_01_g04060:upstream_gene_variant:-:-:-:-:-, Macma4_01_g04070:intron_variant:-:-:-:-:-
chr01	2662149	A	T	L2-1-2-1-1-1-1-1-1-1-1-1-1-1-1-1-2	COL07	1	Macma4_01_g04060:upstream_gene_variant:-:-:-:-:-, Macma4_01_g04070:intron_variant:-:-:-:-:-
chr01	2670632	G	A	L2-1-2-1-1-1-1-1-1-1-1-2-1-3	HND02	1	Macma4_01_g04070:downstream_gene_variant:-:-:-:-:-, Macma4_01_g04080:synonymous_variant:426:426:142:S:tcC/tcT, Macma4_01_g04090:downstream_gene_variant:-:-:-:-:-
chr01	2675688	C	T	L2-1-1-1-1-3-2-2-1-2-2	ES-CN21,ES-CN22	2	Macma4_01_g04080:upstream_gene_variant:-:-:-:-:-, Macma4_01_g04090:intron_variant:-:-:-:-:-
chr01	2677208	A	T	L2-1-1-1-1-3-2-2-1-1-2-2	AUS03	1	Macma4_01_g04090:intron_variant:-:-:-:-:-, Macma4_01_g04100:downstream_gene_variant:-:-:-:-:-
chr01	2677316	G	A	L2	AUS01,AUS02,AUS03,AUS04,AUS05,AUS06,AUS07,AUS08,AUS09,AUS10,CMR01,CMR02,ES-CN01,ES-CN02,ES-CN03,ES-CN04,ES-CN05,ES-CN06,ES-CN07,ES-CN08,ES-CN09,ES-CN10,ES-CN11,ES-CN12,ES-CN13,ES-CN14,ES-CN15,ES-CN16,ES-CN17,ES-CN18,ES-CN19,ES-CN20,ES-CN21,ES-CN22,ES-CN23,ES-CN24,ES-CN25,ES-CN26,ES-CN27,ES-CN28,ES-CN29,ES-CN30,ES-CN31,ES-CN32,COL01,COL02,COL03,COL04,COL05,COL06,COL07,CRI01,CRI02,CRI03,CRI04,CRI05…	115	Macma4_01_g04090:intron_variant:-:-:-:-:-, Macma4_01_g04100:downstream_gene_variant:-:-:-:-:-
chr01	2679592	C	T	L2-1-2-1-1-2-2	ES-CN27	1	Macma4_01_g04090:intron_variant:-:-:-:-:-, Macma4_01_g04100:downstream_gene_variant:-:-:-:-:-
chr01	2692828	C	T	L2-1-1-1-1-1-2-4-2-2	ES-CN11,ES-CN12	2	Macma4_01_g04100:intron_variant:-:-:-:-:-
chr01	2694014	C	T	L1-2-1-2-1	PHL10	1	Macma4_01_g04100:intron_variant:-:-:-:-:-
chr01	2695935	C	A	L2-1-2-1-1-1-1-2	MEX02	1	Macma4_01_g04100:intron_variant:-:-:-:-:-
chr01	2695987	G	T	L2-1-2-1-1-1-1-1-1-1-1-1-1-1-1-1-1-2	CRI03,CRI04	2	Macma4_01_g04100:intron_variant:-:-:-:-:-
chr01	2701206	G	A	L2-1-2-1-1-1-1-1-1-1-1-1-2-1	KOR04	1	Macma4_01_g04100:intron_variant:-:-:-:-:-, Macma4_01_g04110:upstream_gene_variant:-:-:-:-:-
chr01	2706904	T	C	L1-2-2-2-2-2-3-2-2	TH-KOR01,TH-KOR02,TH-KOR03,TH-KOR04,TH-KOR05,TH-KOR06,TH-KOR07,TH-KOR08	8	Macma4_01_g04100:upstream_gene_variant:-:-:-:-:-, Macma4_01_g04110:intron_variant:-:-:-:-:-, Macma4_01_g04120:downstream_gene_variant:-:-:-:-:-
chr01	2711219	C	A	L2-1-1-1-1-3-2-2-2-2-3-2-1-1	DOM03	1	Macma4_01_g04110:downstream_gene_variant:-:-:-:-:-, Macma4_01_g04120:intron_variant:-:-:-:-:-
chr01	2713080	A	C	L2-1-2-1-1-1-1-1-1-1-1-1-2	KOR03,KOR04	2	Macma4_01_g04110:downstream_gene_variant:-:-:-:-:-, Macma4_01_g04120:upstream_gene_variant:-:-:-:-:-
chr01	2721639	G	C	L2-2-1-1-1-2	PER03	1	Macma4_01_g04130:downstream_gene_variant:-:-:-:-:-, Macma4_01_g04140:downstream_gene_variant:-:-:-:-:-, Macma4_01_g04150:upstream_gene_variant:-:-:-:-:-
chr01	2748111	T	A	L2-1-2-1-1-1-1-1-1-1-1-2-1-1-1-1	ECU09	1	Macma4_01_g04170:upstream_gene_variant:-:-:-:-:-, Macma4_01_g04180:downstream_gene_variant:-:-:-:-:-, Macma4_01_g04190:downstream_gene_variant:-:-:-:-:-, Macma4_01_g04200:upstream_gene_variant:-:-:-:-:-
chr01	2748614	T	C	L2-1-2-1-1-1-1-1-1-1-2-1-2	PHL03	1	Macma4_01_g04180:downstream_gene_variant:-:-:-:-:-, Macma4_01_g04190:downstream_gene_variant:-:-:-:-:-, Macma4_01_g04200:upstream_gene_variant:-:-:-:-:-
chr01	2752207	C	A	L1-2-1-2-2-2-2-1	PHL06	1	Macma4_01_g04190:downstream_gene_variant:-:-:-:-:-, Macma4_01_g04200:upstream_gene_variant:-:-:-:-:-
chr01	2756832	G	A	L2-1-2-1-1-1-1-1-1-1-2-1-1	PHL04	1	Macma4_01_g04200:downstream_gene_variant:-:-:-:-:-, Macma4_01_g04210:upstream_gene_variant:-:-:-:-:-
chr01	2765297	A	G	L2-1-2-1-1-1-1-1-1-1-1-1-1-1-1-3-2	ECU02	1	Macma4_01_g04210:downstream_gene_variant:-:-:-:-:-, Macma4_01_g04220:upstream_gene_variant:-:-:-:-:-, Macma4_01_g04230:downstream_gene_variant:-:-:-:-:-
chr01	2773635	T	G	L2-1-1-1-1-3-2-2-2-2-2-1-1	AUS01	1	Macma4_01_g04230:upstream_gene_variant:-:-:-:-:-, Macma4_01_g04240:3_prime_UTR_variant:510:-:-:-:-, Macma4_01_g04250:downstream_gene_variant:-:-:-:-:-
chr01	2781038	C	T	L2-1-1-1-1-3-2-2-2-2-3-1	COL05	1	Macma4_01_g04250:upstream_gene_variant:-:-:-:-:-, Macma4_01_g04260:upstream_gene_variant:-:-:-:-:-
chr01	2788840	G	T	L2-1-1-1-1-3-2-2-2-2-3-2-2-2-1	CMR02	1	Macma4_01_g04260:downstream_gene_variant:-:-:-:-:-, Macma4_01_g04270:missense_variant:1917:1366:456:D/Y:Gat/Tat
chr01	2791190	C	T	L2-1-1-1-1-3-2-2-2-2-3-1	COL05	1	Macma4_01_g04270:downstream_gene_variant:-:-:-:-:-, Macma4_01_g04280:downstream_gene_variant:-:-:-:-:-
chr01	2792227	G	A	L1-2-2-2-2-2	CHN01,CHN02,CHN03,CHN04,CHN05,VNM10,TH-KOR01,TH-KOR02,TH-KOR03,TH-KOR04,TH-KOR05,TH-KOR06,TH-KOR07,TH-KOR08,VNM01,VNM03,VNM02,VNM05,VNM07	19	Macma4_01_g04270:downstream_gene_variant:-:-:-:-:-, Macma4_01_g04280:downstream_gene_variant:-:-:-:-:-, Macma4_01_g04290:downstream_gene_variant:-:-:-:-:-
chr01	2801898	C	T	L1-2-1-2-1	PHL10	1	Macma4_01_g04290:intron_variant:-:-:-:-:-
chr01	2803912	T	A	L2-1-1-1-1-3-2-2-2-2-2-2-3-2-1	AUS04	1	Macma4_01_g04290:intron_variant:-:-:-:-:-
chr01	2807220	C	G	L2-1-2-1-1-1-1-1-1-1-1-2-1-3	HND02	1	Macma4_01_g04290:missense_variant,splice_region_variant:2869:2230:744:A/P:Gct/Cct, Macma4_01_g04300:downstream_gene_variant:-:-:-:-:-
chr01	2819730	T	C	L2-1-2-1-1-1-1-1-1-2-1	PAN01	1	Macma4_01_g04300:upstream_gene_variant:-:-:-:-:-, Macma4_01_g04310:intron_variant:-:-:-:-:-
chr01	2819954	G	A	L2-1-2-1-1-1-1-1-1-1-1-1-1-1-1-2-1-2	ES-CN25	1	Macma4_01_g04300:upstream_gene_variant:-:-:-:-:-, Macma4_01_g04310:missense_variant:2463:1664:555:G/E:gGa/gAa, Macma4_01_g04320:downstream_gene_variant:-:-:-:-:-
chr01	2824419	A	C	L2-1-1-1-1-1-2-5-2-3-1	ES-CN08	1	Macma4_01_g04310:downstream_gene_variant:-:-:-:-:-, Macma4_01_g04320:downstream_gene_variant:-:-:-:-:-, Macma4_01_g04330:upstream_gene_variant:-:-:-:-:-
chr01	2825994	C	G	L2-1-1-1-1-3-2-2-1-2-1	NIC01	1	Macma4_01_g04320:upstream_gene_variant:-:-:-:-:-, Macma4_01_g04330:stop_gained:160:51:17:Y/*:taC/taG, Macma4_01_g04340:upstream_gene_variant:-:-:-:-:-
chr01	2828191	A	T	L2-2-1-1-1-3	COL01	1	Macma4_01_g04320:upstream_gene_variant:-:-:-:-:-, Macma4_01_g04330:intron_variant:-:-:-:-:-, Macma4_01_g04340:upstream_gene_variant:-:-:-:-:-
chr01	2832743	G	T	L2-1-2-1-1-1-1-1-1-1-1-2-2-1-2	ES-CN19	1	Macma4_01_g04330:downstream_gene_variant:-:-:-:-:-, Macma4_01_g04340:downstream_gene_variant:-:-:-:-:-, Macma4_01_g04350:upstream_gene_variant:-:-:-:-:-, Macma4_01_g04360:downstream_gene_variant:-:-:-:-:-, Macma4_01_g04370:upstream_gene_variant:-:-:-:-:-
chr01	2838807	G	GC	L2-1-1-1-1-3-2-2-2-2-3-2-2-1	ECU08	1	Macma4_01_g04350:downstream_gene_variant:-:-:-:-:-, Macma4_01_g04360:upstream_gene_variant:-:-:-:-:-, Macma4_01_g04370:frameshift_variant:1714-1715:1602-1603:534-535:-/X:-/C, Macma4_01_g04380:downstream_gene_variant:-:-:-:-:-, Macma4_01_g04390:upstream_gene_variant:-:-:-:-:-
chr01	2840023	T	C	L2-2-1-1-1-3	COL01	1	Macma4_01_g04360:upstream_gene_variant:-:-:-:-:-, Macma4_01_g04370:downstream_gene_variant:-:-:-:-:-, Macma4_01_g04380:missense_variant:703:703:235:T/A:Aca/Gca, Macma4_01_g04390:upstream_gene_variant:-:-:-:-:-
chr01	2841936	G	T	L2-1-2-1-1-1-1-1-1-1-1-1-1-1-2	NIC02	1	Macma4_01_g04370:downstream_gene_variant:-:-:-:-:-, Macma4_01_g04380:upstream_gene_variant:-:-:-:-:-, Macma4_01_g04390:missense_variant:686:686:229:S/I:aGc/aTc, Macma4_01_g04400:downstream_gene_variant:-:-:-:-:-
chr01	2849642	CTA	C	L2-1-1-1-1-3-2-2-1-1-1	ECU01	1	Macma4_01_g04400:5_prime_UTR_variant:126-127:-:-:-:-, Macma4_01_g04410:upstream_gene_variant:-:-:-:-:-
chr01	2850003	C	A	L2-1-2-1-1-1-1-1-1-1-1-2-2-2	COL04	1	Macma4_01_g04400:upstream_gene_variant:-:-:-:-:-, Macma4_01_g04410:upstream_gene_variant:-:-:-:-:-
chr01	2850646	C	A	L2-1-1-1-1-3-2-2-1-2-2-2	ES-CN22	1	Macma4_01_g04400:upstream_gene_variant:-:-:-:-:-, Macma4_01_g04410:upstream_gene_variant:-:-:-:-:-
chr01	2856784	T	G	L2-1-1-1-1-3-2-2-2-1	PHL08	1	Macma4_01_g04410:missense_variant:1013:787:263:L/V:Tta/Gta, Macma4_01_g04420:upstream_gene_variant:-:-:-:-:-
chr01	2860543	A	C	L2-1-1-1-1-3-2-2-2-2-3-1	COL05	1	Macma4_01_g04410:downstream_gene_variant:-:-:-:-:-, Macma4_01_g04420:downstream_gene_variant:-:-:-:-:-, Macma4_01_g04430:upstream_gene_variant:-:-:-:-:-
chr01	2862069	C	T	L2-1-1-1-2-1	ES-CN17,ES-CN18	2	Macma4_01_g04410:downstream_gene_variant:-:-:-:-:-, Macma4_01_g04420:downstream_gene_variant:-:-:-:-:-, Macma4_01_g04430:upstream_gene_variant:-:-:-:-:-
chr01	2863407	C	A	L2-1-2-1-1-1-1-1-1-1-1-2-2-1-2	ES-CN19	1	Macma4_01_g04420:downstream_gene_variant:-:-:-:-:-, Macma4_01_g04430:upstream_gene_variant:-:-:-:-:-, Macma4_01_g04440:upstream_gene_variant:-:-:-:-:-
chr01	2864562	A	C	L2-1-2-1-1-1-1-1-1-1-1-1-2-2	KOR03	1	Macma4_01_g04430:upstream_gene_variant:-:-:-:-:-, Macma4_01_g04440:upstream_gene_variant:-:-:-:-:-
chr01	2866029	C	T	L2-1-2-1-1-1-1-1-1-1-1-2-1-2	GHA04	1	Macma4_01_g04430:synonymous_variant:509:411:137:G:ggC/ggT, Macma4_01_g04440:upstream_gene_variant:-:-:-:-:-
chr01	2867328	A	T	L2-1-1-1-1-1-2-3	ES-CN03,ES-CN04,ES-CN09,ES-CN10	4	Macma4_01_g04430:downstream_gene_variant:-:-:-:-:-, Macma4_01_g04440:missense_variant:206:175:59:I/F:Att/Ttt
chr01	2869922	G	A	L2-1-2-1-1-1-1-1-1	ES-CN19,ES-CN25,ES-CN26,ES-CN31,ES-CN32,COL04,COL07,CRI01,CRI03,CRI04,CRI05,CRI09,CRI10,ECU02,ECU03,ECU06,ECU07,ECU09,GHA04,GLP01,GLP03,HND01,HND02,KOR03,KOR04,NIC02,PAN01,PHL03,PHL04,PHL09	30	Macma4_01_g04430:downstream_gene_variant:-:-:-:-:-, Macma4_01_g04440:intron_variant:-:-:-:-:-
chr01	2871473	C	A	L1-2-2-2-2-2-1	CHN01	1	Macma4_01_g04430:downstream_gene_variant:-:-:-:-:-, Macma4_01_g04440:synonymous_variant:787:756:252:V:gtC/gtA
chr01	2874359	A	C	L2-1-1-1-1-1-2-5-2-3	ES-CN05,ES-CN07,ES-CN08	3	Macma4_01_g04440:intron_variant:-:-:-:-:-, Macma4_01_g04450:downstream_gene_variant:-:-:-:-:-
chr01	2884297	G	T	L2-1-2-1-1-1-1-1-1-2-2	PHL09	1	Macma4_01_g04460:intron_variant:-:-:-:-:-
chr01	2885212	G	A	L2-1-2-1-1-1-1-1-1-1-1-2-1-1-1-1	ECU09	1	Macma4_01_g04460:intron_variant:-:-:-:-:-
chr01	2885334	T	C	L1-2-2-2-2-2-2-2-2-2	VNM07	1	Macma4_01_g04460:intron_variant:-:-:-:-:-
chr01	2887506	T	G	L1-2-2-2-2-2-3-2-2	TH-KOR01,TH-KOR02,TH-KOR03,TH-KOR04,TH-KOR05,TH-KOR06,TH-KOR07,TH-KOR08	8	Macma4_01_g04460:intron_variant:-:-:-:-:-, Macma4_01_g04470:upstream_gene_variant:-:-:-:-:-
chr01	2891415	G	A	L2-1-1-1-1-3-2-2-2-2-3-2-1-2	KOR02,KOR05	2	Macma4_01_g04460:upstream_gene_variant:-:-:-:-:-, Macma4_01_g04470:synonymous_variant:372:372:124:L:ctG/ctA
chr01	2892142	C	T	L2-2-1-1-1-3	COL01	1	Macma4_01_g04460:upstream_gene_variant:-:-:-:-:-, Macma4_01_g04470:downstream_gene_variant:-:-:-:-:-
chr01	2908000	G	T	L2-1-2-1-1-1-1-1-1-1-1-1-1-1-1-1-1-1-1	CRI10	1	Macma4_01_g04490:downstream_gene_variant:-:-:-:-:-, Macma4_01_g04500:synonymous_variant:330:330:110:S:tcG/tcT, Macma4_01_g04510:downstream_gene_variant:-:-:-:-:-, Macma4_01_g04520:downstream_gene_variant:-:-:-:-:-
chr01	2909606	G	T	L2-1-1-1-1-3-2-2-1-2-2-2	ES-CN22	1	Macma4_01_g04490:downstream_gene_variant:-:-:-:-:-, Macma4_01_g04500:downstream_gene_variant:-:-:-:-:-, Macma4_01_g04510:upstream_gene_variant:-:-:-:-:-, Macma4_01_g04520:downstream_gene_variant:-:-:-:-:-
chr01	2912040	G	T	L2-1-2-1-1-1-1-1-1-2-1	PAN01	1	Macma4_01_g04500:downstream_gene_variant:-:-:-:-:-, Macma4_01_g04510:upstream_gene_variant:-:-:-:-:-, Macma4_01_g04520:downstream_gene_variant:-:-:-:-:-, Macma4_01_g04530:downstream_gene_variant:-:-:-:-:-
chr01	2917627	G	A	L1-2-1-2-2-2	PHL02,PHL05,PHL06	3	Macma4_01_g04520:upstream_gene_variant:-:-:-:-:-, Macma4_01_g04530:upstream_gene_variant:-:-:-:-:-, Macma4_01_g04540:downstream_gene_variant:-:-:-:-:-
chr01	2928386	T	G	L1-2-2-2-2	CHN01,CHN02,CHN03,CHN04,CHN05,VNM10,TH-KOR01,TH-KOR02,TH-KOR03,TH-KOR04,TH-KOR05,TH-KOR06,TH-KOR07,TH-KOR08,VNM01,VNM03,VNM02,VNM05,VNM06,VNM07	20	Macma4_01_g04550:synonymous_variant:310:144:48:L:ctT/ctG
chr01	2938373	G	A	L2-1-2-1-1-1-1-2	MEX02	1	Macma4_01_g04560:missense_variant:1016:295:99:G/R:Gga/Aga
chr01	2939728	G	A	L2-1-1-1-1-3-2-2-2-2-3-2-2-1	ECU08	1	Macma4_01_g04560:intron_variant:-:-:-:-:-
chr01	2943680	G	A	L2-1-2-1-2	GTM01	1	Macma4_01_g04560:downstream_gene_variant:-:-:-:-:-, Macma4_01_g04570:downstream_gene_variant:-:-:-:-:-
chr01	2944418	G	A	L2-1-1-1-1-1-2-3	ES-CN03,ES-CN04,ES-CN09,ES-CN10	4	Macma4_01_g04560:downstream_gene_variant:-:-:-:-:-, Macma4_01_g04570:downstream_gene_variant:-:-:-:-:-
chr01	2950617	T	A	L2-1-2-1-1-1-1-1-1-1-1-1-1-1-1-1-1-2	CRI03,CRI04	2	Macma4_01_g04570:intron_variant:-:-:-:-:-
chr01	2950620	C	A	L2-1-2-1-1-1-1-1-1-1-1-1-1-1-1-1-1-2	CRI03,CRI04	2	Macma4_01_g04570:intron_variant:-:-:-:-:-
chr01	2950678	T	G	L2-1-1-1-1-2-2-2	GLP02	1	Macma4_01_g04570:intron_variant:-:-:-:-:-
chr01	2953706	C	A	L1-2-2-2-2-2-2-2-2-1	CHN05	1	Macma4_01_g04570:intron_variant:-:-:-:-:-
chr01	2957383	A	G	L2-1-1-1-1-3-2-2-2-2-3-2-2-2-1	CMR02	1	Macma4_01_g04570:intron_variant:-:-:-:-:-
chr01	2958031	A	C	L1-2-2-2-2-1	VNM06	1	Macma4_01_g04570:intron_variant:-:-:-:-:-
chr01	2962541	G	A	L2-2-2	GTM02,MEX01,UKN01,UKN02	4	Macma4_01_g04570:intron_variant:-:-:-:-:-
chr01	2964739	T	A	L2-1-2-2-1-2-2	PER02	1	Macma4_01_g04570:upstream_gene_variant:-:-:-:-:-
chr01	2972063	C	T	L2-2-2-1	UKN01,UKN02	2	Macma4_01_g04580:upstream_gene_variant:-:-:-:-:-
chr01	2975694	T	C	L1	CHN01,CHN02,CHN03,CHN04,CHN05,VNM10,TH-KOR01,TH-KOR02,TH-KOR03,TH-KOR04,TH-KOR05,TH-KOR06,TH-KOR07,TH-KOR08,PHL02,KOR01,KOR06,PHL01,PHL05,PHL06,PHL10,VNM01,VNM03,VNM02,VNM04,VNM05,VNM06,VNM07,VNM09	29	Macma4_01_g04580:intron_variant:-:-:-:-:-
chr01	2979636	G	A	L2-1-1-1-1-3-1	AUS09	1	Macma4_01_g04580:missense_variant:2339:2339:780:R/Q:cGg/cAg
chr01	2988093	C	T	L2-1-2-1-1-1-1-1-1-1-1-2-1-1	ECU06,ECU07,ECU09	3	Macma4_01_g04580:intron_variant:-:-:-:-:-
chr01	2997370	A	G	L2-1-2-1-1-1-1-1-1-1-1-1-1-1-1-4	ES-CN32	1	Macma4_01_g04590:upstream_gene_variant:-:-:-:-:-, Macma4_01_g04600:upstream_gene_variant:-:-:-:-:-
chr01	2998921	T	A	L2-1-2-1-1-1-1-1-1-1-1-1-1-2	GLP01	1	Macma4_01_g04590:upstream_gene_variant:-:-:-:-:-, Macma4_01_g04600:upstream_gene_variant:-:-:-:-:-, Macma4_01_g04610:downstream_gene_variant:-:-:-:-:-
chr01	3000927	G	C	L1-2-2-2-2-2-3-2-2-2-2-1	TH-KOR07	1	Macma4_01_g04590:upstream_gene_variant:-:-:-:-:-, Macma4_01_g04600:missense_variant:1067:976:326:A/P:Gct/Cct, Macma4_01_g04610:downstream_gene_variant:-:-:-:-:-
chr01	3006500	G	A	L2-1-1-1-1-3-2-2-2-2-3-2-2-2-1	CMR02	1	Macma4_01_g04600:downstream_gene_variant:-:-:-:-:-, Macma4_01_g04610:upstream_gene_variant:-:-:-:-:-, Macma4_01_g04620:upstream_gene_variant:-:-:-:-:-
chr01	3009417	A	C	L2-1-2-1-1-1-1-1-1-1-1-1-1-1-1-3	ECU02,ECU03	2	Macma4_01_g04610:upstream_gene_variant:-:-:-:-:-, Macma4_01_g04620:intron_variant:-:-:-:-:-, Macma4_01_g04630:upstream_gene_variant:-:-:-:-:-
chr01	3013832	T	A	L2-1-2-1-1-1-1-1-1-1-1-1-1-1-1-2-2-2	CRI05	1	Macma4_01_g04620:downstream_gene_variant:-:-:-:-:-, Macma4_01_g04630:downstream_gene_variant:-:-:-:-:-, Macma4_01_g04640:downstream_gene_variant:-:-:-:-:-
chr01	3015281	G	C	L2-1-1-1-1-3-2-2-2-2-3-2-1-2	KOR02,KOR05	2	Macma4_01_g04620:downstream_gene_variant:-:-:-:-:-, Macma4_01_g04630:downstream_gene_variant:-:-:-:-:-, Macma4_01_g04640:3_prime_UTR_variant:2237:-:-:-:-
chr01	3021956	T	G	L2-1-2-1-1-1-1-1-2	CRI02,CRI08	2	Macma4_01_g04640:intron_variant:-:-:-:-:-
chr01	3039213	G	A	L1-2-2-2-2-2-1	CHN01	1	Macma4_01_g04650:downstream_gene_variant:-:-:-:-:-, Macma4_01_g04660:missense_variant:235:235:79:R/C:Cgt/Tgt, Macma4_01_g04670:downstream_gene_variant:-:-:-:-:-
chr01	3041581	G	A	L1-2-2-2-2-2-3-2-2-2-2-1	TH-KOR07	1	Macma4_01_g04660:upstream_gene_variant:-:-:-:-:-, Macma4_01_g04670:intron_variant:-:-:-:-:-
chr01	3053531	T	C	L2-1-1-1-1-2-1	ES-CN20	1	Macma4_01_g04670:intron_variant:-:-:-:-:-
chr01	3053873	T	C	L2-1-2-1-1-1-1-1-2-2	CRI02	1	Macma4_01_g04670:intron_variant:-:-:-:-:-
chr01	3053901	G	A	L1-2-2-2-2-2-2-2-2-2	VNM07	1	Macma4_01_g04670:intron_variant:-:-:-:-:-
chr01	3058402	C	G	L1-2-2-2-2-2-3-2-2-2-1-1	TH-KOR06	1	Macma4_01_g04670:intron_variant:-:-:-:-:-
chr01	3060853	C	A	L2-1-2-1-1-1-1-1-1-1-2-1-2	PHL03	1	Macma4_01_g04670:intron_variant:-:-:-:-:-
chr01	3069303	T	C	L2-1-1-1-1-3-2-2-2-2-2-2-3-1	AUS10	1	Macma4_01_g04680:synonymous_variant:1093:900:300:V:gtT/gtC
chr01	3075416	G	T	L2-1-1-1-1-1-2-5-2-3-2	ES-CN05,ES-CN07	2	Macma4_01_g04680:downstream_gene_variant:-:-:-:-:-, Macma4_01_g04690:missense_variant:553:553:185:P/T:Ccg/Acg, Macma4_01_g04700:upstream_gene_variant:-:-:-:-:-
chr01	3075467	C	T	L2-1-1-1-1-3-1	AUS09	1	Macma4_01_g04680:downstream_gene_variant:-:-:-:-:-, Macma4_01_g04690:missense_variant:502:502:168:G/R:Ggg/Agg, Macma4_01_g04700:upstream_gene_variant:-:-:-:-:-
chr01	3077601	C	T	L1-2-1-2-2-2-2-2	PHL02	1	Macma4_01_g04680:downstream_gene_variant:-:-:-:-:-, Macma4_01_g04690:upstream_gene_variant:-:-:-:-:-, Macma4_01_g04700:upstream_gene_variant:-:-:-:-:-
chr01	3077606	T	C	L1-2-1-2-2-2-2-2	PHL02	1	Macma4_01_g04680:downstream_gene_variant:-:-:-:-:-, Macma4_01_g04690:upstream_gene_variant:-:-:-:-:-, Macma4_01_g04700:upstream_gene_variant:-:-:-:-:-
chr01	3096485	T	A	L2-1-2-1-1-1-1-1-1-1-1-1-1-1-2	NIC02	1	Macma4_01_g04710:intron_variant:-:-:-:-:-
chr01	3099517	C	CA	L1-2-2-2-2-2-2-1-1	VNM01	1	Macma4_01_g04710:intron_variant:-:-:-:-:-
chr01	3101599	C	A	L2-1-2-1-1-1-1-1-1-1-1-2-1	ECU06,ECU07,ECU09,GHA04,HND02	5	Macma4_01_g04710:missense_variant:443:131:44:R/L:cGc/cTc
chr01	3113262	G	T	L2-1-1-1-1-3-2-2-1-2-2-2	ES-CN22	1	Macma4_01_g04720:downstream_gene_variant:-:-:-:-:-, Macma4_01_g04730:synonymous_variant:1905:1905:635:I:atC/atA
chr01	3119408	A	G	L2-1-2-1-1-1-1-1-1-1-1-1-1-1-1	ES-CN25,ES-CN26,ES-CN31,ES-CN32,COL07,CRI03,CRI04,CRI05,CRI09,CRI10,ECU02,ECU03	12	Macma4_01_g04730:upstream_gene_variant:-:-:-:-:-, Macma4_01_g04740:downstream_gene_variant:-:-:-:-:-
chr01	3137073	T	A	L2-1-2-1-1-1-1-2	MEX02	1	Macma4_01_g04750:upstream_gene_variant:-:-:-:-:-, Macma4_01_g04760:3_prime_UTR_variant:2984:-:-:-:-
chr01	3137535	C	T	L1-2-1-2-1	PHL10	1	Macma4_01_g04750:upstream_gene_variant:-:-:-:-:-, Macma4_01_g04760:synonymous_variant:2522:2043:681:A:gcG/gcA
chr01	3142106	C	A	L1-2-1-2-2-2-1	PHL05	1	Macma4_01_g04760:intron_variant:-:-:-:-:-
chr01	3150940	A	G	L2-1-1-1-1-3-2-2-1-2-1	NIC01	1	Macma4_01_g04770:upstream_gene_variant:-:-:-:-:-, Macma4_01_g04780:upstream_gene_variant:-:-:-:-:-
chr01	3153066	A	T	L1-2-1-2-1	PHL10	1	Macma4_01_g04770:upstream_gene_variant:-:-:-:-:-, Macma4_01_g04780:intron_variant:-:-:-:-:-
chr01	3165534	G	A	L2-2-2-1-1	UKN02	1	Macma4_01_g04790:downstream_gene_variant:-:-:-:-:-, Macma4_01_g04800:upstream_gene_variant:-:-:-:-:-
chr01	3180539	G	T	L1-2-2-2-2-2-2-2-2	CHN05,VNM07	2	Macma4_01_g04820:missense_variant:6369:5965:1989:L/M:Ctg/Atg
chr01	3206189	A	C	L1-2-2-2-2-2-2-1	VNM01,VNM03,VNM02	3	Macma4_01_g04820:intron_variant:-:-:-:-:-, Macma4_01_g04830:downstream_gene_variant:-:-:-:-:-
chr01	3214686	T	C	L2-1-2-1-1-1-1-2	MEX02	1	Macma4_01_g04820:intron_variant:-:-:-:-:-, Macma4_01_g04830:upstream_gene_variant:-:-:-:-:-
chr01	3218402	C	G	L2-1-2-1-1-1-1-1-1-1-1-2-2-2	COL04	1	Macma4_01_g04820:upstream_gene_variant:-:-:-:-:-, Macma4_01_g04840:downstream_gene_variant:-:-:-:-:-, Macma4_01_g04850:downstream_gene_variant:-:-:-:-:-
chr01	3219382	C	T	L1-2-1-2-2-1	VNM09	1	Macma4_01_g04820:upstream_gene_variant:-:-:-:-:-, Macma4_01_g04840:downstream_gene_variant:-:-:-:-:-, Macma4_01_g04850:downstream_gene_variant:-:-:-:-:-
chr01	3222923	A	G	L2-1-1-1-1-3-2-2-1-1-1	ECU01	1	Macma4_01_g04840:intron_variant:-:-:-:-:-, Macma4_01_g04850:upstream_gene_variant:-:-:-:-:-
chr01	3228239	G	T	L2-1-2-1-1-1-1-1-1-1-1-1-1-1-1-4	ES-CN32	1	Macma4_01_g04840:upstream_gene_variant:-:-:-:-:-
chr01	3233769	A	T	L2-1-2-1-1-1-1-1-1-1-2-1-1	PHL04	1	Macma4_01_g04860:upstream_gene_variant:-:-:-:-:-
chr01	3234945	C	T	L2-1-1-1-1-3-2-2-1-2-2	ES-CN21,ES-CN22	2	Macma4_01_g04860:upstream_gene_variant:-:-:-:-:-
chr01	3242038	G	A	L2-1-1-1-1-3-2-2-1-2-1	NIC01	1	Macma4_01_g04860:downstream_gene_variant:-:-:-:-:-, Macma4_01_g04870:synonymous_variant:807:807:269:C:tgC/tgT
chr01	3243950	G	C	L1-2-2-2-2-2	CHN01,CHN02,CHN03,CHN04,CHN05,VNM10,TH-KOR01,TH-KOR02,TH-KOR03,TH-KOR04,TH-KOR05,TH-KOR06,TH-KOR07,TH-KOR08,VNM01,VNM03,VNM02,VNM05,VNM07	19	Macma4_01_g04870:upstream_gene_variant:-:-:-:-:-, Macma4_01_g04880:downstream_gene_variant:-:-:-:-:-
chr01	3247148	C	A	L2-1-2-1-1-1-1-1-1-1-1-2-1-1	ECU06,ECU07,ECU09	3	Macma4_01_g04870:upstream_gene_variant:-:-:-:-:-, Macma4_01_g04880:downstream_gene_variant:-:-:-:-:-
chr01	3250906	C	A	L2-1-2-1-1-1-1-2	MEX02	1	Macma4_01_g04880:intron_variant:-:-:-:-:-
chr01	3262952	G	A	L1-2-2-2-2-2-3-2-2-1-2-2	TH-KOR04	1	Macma4_01_g04880:intron_variant:-:-:-:-:-, Macma4_01_g04900:downstream_gene_variant:-:-:-:-:-
chr01	3263165	G	T	L2-1-2-1-1-1-1-1-1-1-1-1-1-1-1-1-1-1-2	CRI09	1	Macma4_01_g04880:intron_variant:-:-:-:-:-, Macma4_01_g04900:downstream_gene_variant:-:-:-:-:-
chr01	3265861	G	A	L2-1-2-1-1-1-1-1-1-1-1-1-1-1-1-1-1-1	CRI09,CRI10	2	Macma4_01_g04880:intron_variant:-:-:-:-:-, Macma4_01_g04900:downstream_gene_variant:-:-:-:-:-
chr01	3268420	A	T	L1-2-2-2-2-2-2-2-1	VNM10	1	Macma4_01_g04880:upstream_gene_variant:-:-:-:-:-, Macma4_01_g04900:missense_variant:287:287:96:F/Y:tTt/tAt
chr01	3268512	G	T	L2-1-2-1-1-1-1-1-1-1-1-1-1-1-1-4	ES-CN32	1	Macma4_01_g04880:upstream_gene_variant:-:-:-:-:-, Macma4_01_g04900:missense_variant:195:195:65:S/R:agC/agA
chr01	3271794	G	A	L2-1-2-2-1-2-2	PER02	1	Macma4_01_g04880:upstream_gene_variant:-:-:-:-:-, Macma4_01_g04890:downstream_gene_variant:-:-:-:-:-, Macma4_01_g04900:upstream_gene_variant:-:-:-:-:-
chr01	3273563	C	G	L2-1-2-1-1-1-1-1-1-1-1-1-1-1-1-2-2-2	CRI05	1	Macma4_01_g04890:downstream_gene_variant:-:-:-:-:-, Macma4_01_g04900:upstream_gene_variant:-:-:-:-:-
chr01	3286513	G	T	L1-2-1-2-1	PHL10	1	Macma4_01_g04890:upstream_gene_variant:-:-:-:-:-, Macma4_01_g04910:upstream_gene_variant:-:-:-:-:-, Macma4_01_g04930:downstream_gene_variant:-:-:-:-:-
chr01	3286802	T	A	L2-1-2-1-1-1-1-1-1-1-1-1-1-1-1-3-1	ECU03	1	Macma4_01_g04890:upstream_gene_variant:-:-:-:-:-, Macma4_01_g04910:upstream_gene_variant:-:-:-:-:-, Macma4_01_g04930:downstream_gene_variant:-:-:-:-:-
chr01	3299228	A	T	L1-2	CHN01,CHN02,CHN03,CHN04,CHN05,VNM10,TH-KOR01,TH-KOR02,TH-KOR03,TH-KOR04,TH-KOR05,TH-KOR06,TH-KOR07,TH-KOR08,PHL02,KOR01,PHL01,PHL05,PHL06,PHL10,VNM01,VNM03,VNM02,VNM04,VNM05,VNM06,VNM07,VNM09	28	Macma4_01_g04920:upstream_gene_variant:-:-:-:-:-, Macma4_01_g04940:upstream_gene_variant:-:-:-:-:-
chr01	3309338	G	A	L2-1-1-1-1-3-2-2-2-2-3-2-2-2-1	CMR02	1	Macma4_01_g04940:intron_variant:-:-:-:-:-
chr01	3312701	T	C	L2-1-1-1-1-3-2-2-1-1-2-2	AUS03	1	Macma4_01_g04940:intron_variant:-:-:-:-:-, Macma4_01_g04950:downstream_gene_variant:-:-:-:-:-
chr01	3316078	T	A	L2-1-1-1-1-3-2-1	DOM01,DOM02	2	Macma4_01_g04940:downstream_gene_variant:-:-:-:-:-, Macma4_01_g04950:downstream_gene_variant:-:-:-:-:-
chr01	3318407	TCGATCTACCGTGCC	T	L2-1-1-1-1-3-2-2-1-1-1	ECU01	1	Macma4_01_g04940:downstream_gene_variant:-:-:-:-:-, Macma4_01_g04950:intron_variant:-:-:-:-:-, Macma4_01_g04960:downstream_gene_variant:-:-:-:-:-
chr01	3318848	A	C	L2-1-1-1-1-3-2-2-2-2-3-2-2-1	ECU08	1	Macma4_01_g04950:intron_variant:-:-:-:-:-, Macma4_01_g04960:downstream_gene_variant:-:-:-:-:-
chr01	3321105	C	T	L2-1-1-1-1-3-2-2-1-2-2-2	ES-CN22	1	Macma4_01_g04950:5_prime_UTR_variant:282:-:-:-:-, Macma4_01_g04960:downstream_gene_variant:-:-:-:-:-
chr01	3325840	C	T	L2-1-2-1-1-1-1-1-1-1-1-1-1-1-1-3	ECU02,ECU03	2	Macma4_01_g04950:upstream_gene_variant:-:-:-:-:-, Macma4_01_g04960:intron_variant:-:-:-:-:-
chr01	3336502	T	C	L2-2-1-1-1-2	PER03	1	Macma4_01_g04960:upstream_gene_variant:-:-:-:-:-
chr01	3346713	C	T	L2-1-2-1-1-1-1-1-1-1-1-1-1-1-1-1-1-1	CRI09,CRI10	2	Macma4_01_g04970:missense_variant:494:494:165:S/N:aGc/aAc
chr01	3347624	G	A	L2-1-1-1-1-3-2-2-2-2-3-2-2-2-2-2	GHA03	1	Macma4_01_g04970:missense_variant:34:34:12:P/S:Cca/Tca
chr01	3347625	C	T	L2-1-1-1-1-3-2-2-2-2-3-2-2-2-2-2	GHA03	1	Macma4_01_g04970:synonymous_variant:33:33:11:P:ccG/ccA
chr01	3351466	G	A	L2-1-1-1-1-3-2-2-2-2-3-2-1-2	KOR02,KOR05	2	Macma4_01_g04970:upstream_gene_variant:-:-:-:-:-, Macma4_01_g04980:upstream_gene_variant:-:-:-:-:-
chr01	3358773	G	A	L2-1-1-1-1-1-2-3	ES-CN03,ES-CN04,ES-CN09,ES-CN10	4	Macma4_01_g04980:intron_variant:-:-:-:-:-, Macma4_01_g04990:downstream_gene_variant:-:-:-:-:-
chr01	3361495	C	T	L2-1-1-1-1-1-2-4-2-2	ES-CN11,ES-CN12	2	Macma4_01_g04980:downstream_gene_variant:-:-:-:-:-, Macma4_01_g04990:downstream_gene_variant:-:-:-:-:-
chr01	3367367	T	A	L1-2-1-1	KOR01	1	Macma4_01_g04990:intron_variant:-:-:-:-:-, Macma4_01_g05000:downstream_gene_variant:-:-:-:-:-
chr01	3368992	A	T	L2-1-1-1-1-3-2-2-2-2-3-2-1-2-2	KOR05	1	Macma4_01_g04990:intron_variant:-:-:-:-:-, Macma4_01_g05000:downstream_gene_variant:-:-:-:-:-
chr01	3369420	G	A	L1-2-2-2-2-2-2-1	VNM01,VNM03,VNM02	3	Macma4_01_g04990:missense_variant:312:151:51:L/F:Ctc/Ttc, Macma4_01_g05000:downstream_gene_variant:-:-:-:-:-
chr01	3373392	G	T	L1-2-1-2-1	PHL10	1	Macma4_01_g04990:upstream_gene_variant:-:-:-:-:-, Macma4_01_g05000:splice_donor_5th_base_variant,intron_variant:-:-:-:-:-, Macma4_01_g05010:downstream_gene_variant:-:-:-:-:-
chr01	3377936	T	C	L2-1-2-1-1-1-1-1-1-1-1-2-2-1-2	ES-CN19	1	Macma4_01_g05000:upstream_gene_variant:-:-:-:-:-, Macma4_01_g05010:intron_variant:-:-:-:-:-
chr01	3380049	C	T	L2-1-1-1-1-3-2-2-2-2-3-2-1-2	KOR02,KOR05	2	Macma4_01_g05010:intron_variant:-:-:-:-:-
chr01	3385068	G	A	L2-1-1-1-1-1-2-2-2	ES-CN14	1	Macma4_01_g05010:intron_variant:-:-:-:-:-
chr01	3389053	G	A	L1-2-2-2-2-2-3-2-2	TH-KOR01,TH-KOR02,TH-KOR03,TH-KOR04,TH-KOR05,TH-KOR06,TH-KOR07,TH-KOR08	8	Macma4_01_g05010:5_prime_UTR_variant:232:-:-:-:-
chr01	3389556	A	T	L2-1-2-1-1-1-1-1-1-1-1-2-1-1-1-2	ECU07	1	Macma4_01_g05010:upstream_gene_variant:-:-:-:-:-
chr01	3390049	G	A	L2-1-2-1-1-1-1-1-2	CRI02,CRI08	2	Macma4_01_g05010:upstream_gene_variant:-:-:-:-:-, Macma4_01_g05020:upstream_gene_variant:-:-:-:-:-
chr01	3396315	C	T	L2-1-2-1-1-1-1-1-1-1-1-1-1-1-1-2-2-1	ES-CN31	1	Macma4_01_g05020:intron_variant:-:-:-:-:-
chr01	3396531	T	C	L2-1-1-1-1-2-2	COL03,GLP02	2	Macma4_01_g05020:intron_variant:-:-:-:-:-
chr01	3397166	T	C	L2-1-2-1-1-1-1-2	MEX02	1	Macma4_01_g05020:intron_variant:-:-:-:-:-
chr01	3398389	C	A	L2	AUS01,AUS02,AUS03,AUS04,AUS05,AUS06,AUS07,AUS08,AUS09,AUS10,CMR01,CMR02,ES-CN01,ES-CN02,ES-CN03,ES-CN04,ES-CN05,ES-CN06,ES-CN07,ES-CN08,ES-CN09,ES-CN10,ES-CN11,ES-CN12,ES-CN13,ES-CN14,ES-CN15,ES-CN16,ES-CN17,ES-CN18,ES-CN19,ES-CN20,ES-CN21,ES-CN22,ES-CN23,ES-CN24,ES-CN25,ES-CN26,ES-CN27,ES-CN28,ES-CN29,ES-CN30,ES-CN31,ES-CN32,COL01,COL02,COL03,COL04,COL05,COL06,COL07,CRI01,CRI02,CRI03,CRI04,CRI05…	115	Macma4_01_g05020:intron_variant:-:-:-:-:-
chr01	3399652	A	T	L2-1-1-1-1-3-2-2-2-2-3-2-1-2-1	KOR02	1	Macma4_01_g05020:intron_variant:-:-:-:-:-
chr01	3399993	C	A	L2-1-1-1-1-1-2-5-2-3	ES-CN05,ES-CN07,ES-CN08	3	Macma4_01_g05020:intron_variant:-:-:-:-:-
chr01	3405269	G	A	L1-2-2-2-2-2-3-1-2	CHN04	1	Macma4_01_g05020:intron_variant:-:-:-:-:-
chr01	3406282	G	A	L2-2-2-1-1	UKN02	1	Macma4_01_g05020:intron_variant:-:-:-:-:-
chr01	3412106	C	A	L2-1-2-1-2	GTM01	1	Macma4_01_g05020:downstream_gene_variant:-:-:-:-:-, Macma4_01_g05030:downstream_gene_variant:-:-:-:-:-
chr01	3417218	G	A	L1-2-2-2-2-2-3-2-2	TH-KOR01,TH-KOR02,TH-KOR03,TH-KOR04,TH-KOR05,TH-KOR06,TH-KOR07,TH-KOR08	8	Macma4_01_g05030:missense_variant:233:233:78:S/F:tCc/tTc, Macma4_01_g05040:upstream_gene_variant:-:-:-:-:-
chr01	3417542	TTCTTCTTCC	T	L2-1-1-1-1-3-2-2-2-2-2-2-1	AUS08	1	Macma4_01_g05030:upstream_gene_variant:-:-:-:-:-, Macma4_01_g05040:upstream_gene_variant:-:-:-:-:-
chr01	3418056	A	T	L2-1-1-1-1-3-2-2-2-2-3-1	COL05	1	Macma4_01_g05030:upstream_gene_variant:-:-:-:-:-, Macma4_01_g05040:upstream_gene_variant:-:-:-:-:-
chr01	3420298	G	A	L2-1-2-1-1-1-2-1-2	GTM03	1	Macma4_01_g05030:upstream_gene_variant:-:-:-:-:-, Macma4_01_g05040:upstream_gene_variant:-:-:-:-:-
chr01	3427537	G	A	L1-2-2-2-2-2-2-2-2-1	CHN05	1	Macma4_01_g05040:downstream_gene_variant:-:-:-:-:-, Macma4_01_g05050:intron_variant:-:-:-:-:-, Macma4_01_g05060:downstream_gene_variant:-:-:-:-:-
chr01	3436239	C	G	L2-1-2-2-1-1-1	PER05	1	Macma4_01_g05070:upstream_gene_variant:-:-:-:-:-
chr01	3437563	T	C	L2-1-2-1-1-1-1-1-1-1-1-2-1-1	ECU06,ECU07,ECU09	3	Macma4_01_g05070:upstream_gene_variant:-:-:-:-:-, Macma4_01_g05080:upstream_gene_variant:-:-:-:-:-
chr01	3441040	T	C	L2-1-2-1-1-1-1-1-1-1-1-2-2-1-2	ES-CN19	1	Macma4_01_g05080:upstream_gene_variant:-:-:-:-:-, Macma4_01_g05090:downstream_gene_variant:-:-:-:-:-
chr01	3442485	T	A	L1-2-2-2-2-2-3-2-2-2	TH-KOR03,TH-KOR05,TH-KOR06,TH-KOR07,TH-KOR08	5	Macma4_01_g05080:intron_variant:-:-:-:-:-, Macma4_01_g05090:downstream_gene_variant:-:-:-:-:-, Macma4_01_g05100:upstream_gene_variant:-:-:-:-:-
chr01	3443301	T	A	L2-1-2-1-1-1-1-1-1-2-1	PAN01	1	Macma4_01_g05080:intron_variant:-:-:-:-:-, Macma4_01_g05090:downstream_gene_variant:-:-:-:-:-, Macma4_01_g05100:upstream_gene_variant:-:-:-:-:-
chr01	3443339	TC	T	L2-1-1-1-1-3-2-2-2-2-3-2-2-2-1	CMR02	1	Macma4_01_g05080:intron_variant:-:-:-:-:-, Macma4_01_g05090:downstream_gene_variant:-:-:-:-:-, Macma4_01_g05100:upstream_gene_variant:-:-:-:-:-
chr01	3460017	TTATA	T	L2-1-2-1-1-1-1-1-1-1-1-1-1-1-1-4	ES-CN32	1	Macma4_01_g05100:downstream_gene_variant:-:-:-:-:-
chr01	3465242	G	C	L1-2-2-2-2-2-3-2-2-2-2-1	TH-KOR07	1	Macma4_01_g05110:downstream_gene_variant:-:-:-:-:-
chr01	3467718	G	A	L2-1-2-1-1-1-1-1-1-1-1-2-1-1-1-1	ECU09	1	Macma4_01_g05110:intron_variant:-:-:-:-:-
chr01	3474491	G	A	L2-1-2-1-1-1-1-1-1-1-1-1-2-1	KOR04	1	Macma4_01_g05110:upstream_gene_variant:-:-:-:-:-, Macma4_01_g05120:downstream_gene_variant:-:-:-:-:-
chr01	3475151	C	T	L2-1-2-1-1-1-1-1-1-1-1-1-1-1-1-2-2-1	ES-CN31	1	Macma4_01_g05110:upstream_gene_variant:-:-:-:-:-, Macma4_01_g05120:3_prime_UTR_variant:1282:-:-:-:-
chr01	3496226	C	T	L2-1-1-1-2-1-1	ES-CN18	1	Macma4_01_g05130:upstream_gene_variant:-:-:-:-:-, Macma4_01_g05140:intron_variant:-:-:-:-:-, Macma4_01_g05150:downstream_gene_variant:-:-:-:-:-
chr01	3498251	G	T	L2-1-1-1-1-3-1	AUS09	1	Macma4_01_g05140:downstream_gene_variant:-:-:-:-:-, Macma4_01_g05150:downstream_gene_variant:-:-:-:-:-, Macma4_01_g05160:downstream_gene_variant:-:-:-:-:-
chr01	3508407	G	A	L1-2-2-2-2-2-3-2-2-2-2-1	TH-KOR07	1	Macma4_01_g05160:missense_variant:315:304:102:H/Y:Cac/Tac, Macma4_01_g05170:downstream_gene_variant:-:-:-:-:-
chr01	3510099	A	G	L1-2-2-2-2-2-3-2-2-2-2-1	TH-KOR07	1	Macma4_01_g05160:upstream_gene_variant:-:-:-:-:-, Macma4_01_g05170:intron_variant:-:-:-:-:-
chr01	3513298	G	C	L2-1-1-1-1-3-2-2-1-2-1	NIC01	1	Macma4_01_g05160:upstream_gene_variant:-:-:-:-:-, Macma4_01_g05170:intron_variant:-:-:-:-:-, Macma4_01_g05180:downstream_gene_variant:-:-:-:-:-
chr01	3517563	G	T	L2-1-2-1-1-1-1-1-1-1-1-1-1-2	GLP01	1	Macma4_01_g05170:upstream_gene_variant:-:-:-:-:-, Macma4_01_g05180:missense_variant:856:846:282:N/K:aaC/aaA
chr01	3518665	C	T	L2-1-2-1-1-1-1-1-1-1-1-1-2	KOR03,KOR04	2	Macma4_01_g05170:upstream_gene_variant:-:-:-:-:-, Macma4_01_g05180:missense_variant:17:7:3:A/T:Gct/Act, Macma4_01_g05190:upstream_gene_variant:-:-:-:-:-
chr01	3518855	G	T	L2-1-1-1-1-3-2-2-2-2-3-1	COL05	1	Macma4_01_g05170:upstream_gene_variant:-:-:-:-:-, Macma4_01_g05180:upstream_gene_variant:-:-:-:-:-, Macma4_01_g05190:upstream_gene_variant:-:-:-:-:-
chr01	3519906	C	A	L1-2-2-2-1	VNM04	1	Macma4_01_g05170:upstream_gene_variant:-:-:-:-:-, Macma4_01_g05180:upstream_gene_variant:-:-:-:-:-, Macma4_01_g05190:upstream_gene_variant:-:-:-:-:-
chr01	3524590	G	T	L2-1-2-1-1-1-1-1-1-2-1	PAN01	1	Macma4_01_g05190:intron_variant:-:-:-:-:-
chr01	3525778	G	C	L1-2-2-2-2-2-3-2-1	CHN02,VNM05	2	Macma4_01_g05190:intron_variant:-:-:-:-:-
chr01	3535139	A	G	L1-2-2-2-1	VNM04	1	Macma4_01_g05190:downstream_gene_variant:-:-:-:-:-, Macma4_01_g05200:upstream_gene_variant:-:-:-:-:-
chr01	3535588	G	T	L2-1-2-1-1-1-1-1-1-1-3	HND01	1	Macma4_01_g05190:downstream_gene_variant:-:-:-:-:-, Macma4_01_g05200:upstream_gene_variant:-:-:-:-:-
chr01	3539696	T	G	L2-2-2	GTM02,MEX01,UKN01,UKN02	4	Macma4_01_g05200:intron_variant:-:-:-:-:-, Macma4_01_g05210:downstream_gene_variant:-:-:-:-:-
chr01	3540029	GAAATTGCGAATCTTGCAC	G	L2-1-2-1-1-1-1-1-1-1-1-1-1-1-1-1-1-1-1	CRI10	1	Macma4_01_g05200:intron_variant:-:-:-:-:-, Macma4_01_g05210:downstream_gene_variant:-:-:-:-:-
chr01	3542415	G	C	L2-1-2-1-1-1-1-1-1-1-2-1-2	PHL03	1	Macma4_01_g05200:3_prime_UTR_variant:703:-:-:-:-, Macma4_01_g05210:downstream_gene_variant:-:-:-:-:-
chr01	3545938	G	T	L1-2-2-2-2-2-3-2-2	TH-KOR01,TH-KOR02,TH-KOR03,TH-KOR04,TH-KOR05,TH-KOR06,TH-KOR07,TH-KOR08	8	Macma4_01_g05200:downstream_gene_variant:-:-:-:-:-, Macma4_01_g05210:synonymous_variant:1073:978:326:L:ctC/ctA
chr01	3552584	T	C	L1-2-2-2-2-2-3-1-2	CHN04	1	Macma4_01_g05210:upstream_gene_variant:-:-:-:-:-, Macma4_01_g05220:intron_variant:-:-:-:-:-
chr01	3562215	C	T	L2-1-2-1-1-1-1-1-1-1-1-2-2-1-1	GLP03	1	Macma4_01_g05220:downstream_gene_variant:-:-:-:-:-, Macma4_01_g05230:downstream_gene_variant:-:-:-:-:-, Macma4_01_g05240:downstream_gene_variant:-:-:-:-:-
chr01	3565214	CAG	C	L2-1-1-1-1-3-2-2-2-2-3-2-2	CMR01,CMR02,ECU08,GHA03	4	Macma4_01_g05230:downstream_gene_variant:-:-:-:-:-, Macma4_01_g05240:downstream_gene_variant:-:-:-:-:-
chr01	3578336	T	C	L2-1-1-1-1-3-2-2-2-2-3-2-2-2-2-1	CMR01	1	Macma4_01_g05250:intron_variant:-:-:-:-:-
chr01	3580857	G	T	L2-1-1-1-1-3-2-2-2-2-3-1	COL05	1	Macma4_01_g05250:intron_variant:-:-:-:-:-
chr01	3582728	T	G	L2-1-2-1-1-1-1-1-1-1-1-2-1-1-1-2	ECU07	1	Macma4_01_g05250:intron_variant:-:-:-:-:-
chr01	3584684	C	A	L1-2-2-2-2-2-2-2-2-1	CHN05	1	Macma4_01_g05250:intron_variant:-:-:-:-:-, Macma4_01_g05260:downstream_gene_variant:-:-:-:-:-
chr01	3585143	G	A	L2-2-1-1-2	CRI06	1	Macma4_01_g05250:missense_variant:1957:1811:604:R/Q:cGa/cAa, Macma4_01_g05260:downstream_gene_variant:-:-:-:-:-
chr01	3590594	C	A	L1-2-2-2-2-1	VNM06	1	Macma4_01_g05250:downstream_gene_variant:-:-:-:-:-, Macma4_01_g05260:stop_gained:1902:1549:517:E/*:Gaa/Taa
chr01	3598818	T	C	L2-1-1-1-1-3-2-2-2-2-3-2-2-2-2-2	GHA03	1	Macma4_01_g05260:upstream_gene_variant:-:-:-:-:-
chr01	3607361	C	A	L2-1-1-1-1-3-2-2-1-2-1	NIC01	1	Macma4_01_g05270:downstream_gene_variant:-:-:-:-:-, Macma4_01_g05280:synonymous_variant:2205:2205:735:V:gtG/gtT, Macma4_01_g05290:downstream_gene_variant:-:-:-:-:-
chr01	3614113	A	T	L2-1-2-1-1-1-1-1-1-1-1-1-2-1	KOR04	1	Macma4_01_g05280:upstream_gene_variant:-:-:-:-:-, Macma4_01_g05290:intron_variant:-:-:-:-:-
chr01	3616883	A	C	L1-2-2-2-2-2-3-2-2-1-2	TH-KOR02,TH-KOR04	2	Macma4_01_g05290:intron_variant:-:-:-:-:-
chr01	3619371	G	A	L2-1-2-1-1-1-1-1-1-1-1-1-2-1	KOR04	1	Macma4_01_g05290:intron_variant:-:-:-:-:-
chr01	3627128	T	A	L2-1-1-1-1-3-2-2-1-1-1	ECU01	1	Macma4_01_g05300:downstream_gene_variant:-:-:-:-:-
chr01	3627144	A	G	L2-1-2-1-1-1-1-1-1-1-1-1-1-1-1-2-2	ES-CN31,CRI05	2	Macma4_01_g05300:downstream_gene_variant:-:-:-:-:-
chr01	3635595	TC	T	L2-1-2-1-1-1-1-1-1-1-1-2-1-3	HND02	1	Macma4_01_g05300:upstream_gene_variant:-:-:-:-:-, Macma4_01_g05310:downstream_gene_variant:-:-:-:-:-
chr01	3635967	G	A	L2-1-2-1-1-1-1-1-1-1-1-1-1-1-1-3-1	ECU03	1	Macma4_01_g05300:upstream_gene_variant:-:-:-:-:-, Macma4_01_g05310:downstream_gene_variant:-:-:-:-:-
chr01	3636565	A	T	L2-1-2-1-1-1-1-1-1-1-1-1-1-1-1-1-1-2-2	CRI03	1	Macma4_01_g05300:upstream_gene_variant:-:-:-:-:-, Macma4_01_g05310:downstream_gene_variant:-:-:-:-:-
chr01	3641704	T	A	L2-1-2-1-1-1-1-1-1-1-1-1-1-1-1-2-1-2	ES-CN25	1	Macma4_01_g05310:missense_variant:1296:1169:390:N/I:aAt/aTt
chr01	3657127	A	C	L2-1-1-1-1-3-2-2-2-2-3-2-1-2	KOR02,KOR05	2	Macma4_01_g05320:upstream_gene_variant:-:-:-:-:-, Macma4_01_g05330:downstream_gene_variant:-:-:-:-:-
chr01	3663131	A	G	L2-1-1-1-1-1-2-4-2-1	ES-CN15	1	Macma4_01_g05330:intron_variant:-:-:-:-:-
chr01	3664083	C	T	L2-1-1-1-1-3-2-2-1-1-1	ECU01	1	Macma4_01_g05330:intron_variant:-:-:-:-:-, Macma4_01_g05340:upstream_gene_variant:-:-:-:-:-
chr01	3669041	C	T	L2-1-1-1-1-3-2-2-1-2-2	ES-CN21,ES-CN22	2	Macma4_01_g05330:upstream_gene_variant:-:-:-:-:-, Macma4_01_g05340:intron_variant:-:-:-:-:-, Macma4_01_g05350:upstream_gene_variant:-:-:-:-:-
chr01	3669198	C	A	L2-1-2-2-1-1-3	PER06	1	Macma4_01_g05330:upstream_gene_variant:-:-:-:-:-, Macma4_01_g05340:intron_variant:-:-:-:-:-, Macma4_01_g05350:upstream_gene_variant:-:-:-:-:-
chr01	3677863	G	C	L2-1-2-1-1-1-1-1-1-2-2	PHL09	1	Macma4_01_g05350:downstream_gene_variant:-:-:-:-:-, Macma4_01_g05360:upstream_gene_variant:-:-:-:-:-, Macma4_01_g05370:downstream_gene_variant:-:-:-:-:-
chr01	3679485	G	A	L2-1-2-2-1-2-1	ECU10	1	Macma4_01_g05350:downstream_gene_variant:-:-:-:-:-, Macma4_01_g05360:upstream_gene_variant:-:-:-:-:-, Macma4_01_g05370:downstream_gene_variant:-:-:-:-:-
chr01	3681663	TA	T	L2-1-1-1-1-3-2-2-1-1-1	ECU01	1	Macma4_01_g05350:downstream_gene_variant:-:-:-:-:-, Macma4_01_g05360:intron_variant:-:-:-:-:-, Macma4_01_g05370:intron_variant:-:-:-:-:-
chr01	3681665	A	C	L2-1-1-1-1-3-2-2-1-1-1	ECU01	1	Macma4_01_g05350:downstream_gene_variant:-:-:-:-:-, Macma4_01_g05360:intron_variant:-:-:-:-:-, Macma4_01_g05370:intron_variant:-:-:-:-:-
chr01	3686817	C	T	L1-2-1-2-2-2-1	PHL05	1	Macma4_01_g05360:intron_variant:-:-:-:-:-, Macma4_01_g05370:upstream_gene_variant:-:-:-:-:-
chr01	3690324	G	A	L2-1-1-1-1-3-2-2-1-1-1	ECU01	1	Macma4_01_g05360:intron_variant:-:-:-:-:-
chr01	3698618	G	T	L2-1-2-1-1-1-1-1-1-1-1-2-2-2	COL04	1	Macma4_01_g05360:intron_variant:-:-:-:-:-
chr01	3716373	C	T	L2-1-2-1-1-1-1-2	MEX02	1	Macma4_01_g05380:upstream_gene_variant:-:-:-:-:-, Macma4_01_g05390:upstream_gene_variant:-:-:-:-:-
chr01	3718701	G	T	L1-2-2-2-2-2-3-2-2-2-2-2	TH-KOR03,TH-KOR05	2	Macma4_01_g05380:upstream_gene_variant:-:-:-:-:-, Macma4_01_g05390:intron_variant:-:-:-:-:-
chr01	3721020	G	T	L2-1-2-1-1-1-1-1-1-1-1-1-1-1-1-3-1	ECU03	1	Macma4_01_g05390:intron_variant:-:-:-:-:-
chr01	3725321	C	T	L1-2-2-2-2-2-3-1-1	CHN03	1	Macma4_01_g05390:intron_variant:-:-:-:-:-, Macma4_01_g05400:upstream_gene_variant:-:-:-:-:-
chr01	3728943	G	T	L1-2-2-2-2-2-2-1-1	VNM01	1	Macma4_01_g05390:downstream_gene_variant:-:-:-:-:-, Macma4_01_g05400:upstream_gene_variant:-:-:-:-:-
chr01	3730220	A	G	L1-2-2-2-2-1	VNM06	1	Macma4_01_g05390:downstream_gene_variant:-:-:-:-:-, Macma4_01_g05400:missense_variant:424:260:87:N/S:aAt/aGt
chr01	3733967	T	G	L1-2-2-2-1	VNM04	1	Macma4_01_g05400:intron_variant:-:-:-:-:-
chr01	3736508	T	A	L2-1-2-1-1-1-1-1-1-1-1-1-2-1	KOR04	1	Macma4_01_g05400:intron_variant:-:-:-:-:-, Macma4_01_g05410:downstream_gene_variant:-:-:-:-:-
chr01	3739922	T	A	L1-2-2-2-2-2-3-2-2-2-1	TH-KOR06,TH-KOR08	2	Macma4_01_g05400:downstream_gene_variant:-:-:-:-:-, Macma4_01_g05410:downstream_gene_variant:-:-:-:-:-
chr01	3743874	G	T	L2-1-2-1-1-1-1-1-1-1-1-2-2-1-1	GLP03	1	Macma4_01_g05400:downstream_gene_variant:-:-:-:-:-, Macma4_01_g05410:intron_variant:-:-:-:-:-, Macma4_01_g05420:upstream_gene_variant:-:-:-:-:-
chr01	3744402	G	T	L2-1-1-1-2-2-2	ECU05	1	Macma4_01_g05400:downstream_gene_variant:-:-:-:-:-, Macma4_01_g05410:intron_variant:-:-:-:-:-, Macma4_01_g05420:upstream_gene_variant:-:-:-:-:-
chr01	3744931	A	C	L2-1-1-1-1-3-2-2-2-2-3-2-2-2-2-1	CMR01	1	Macma4_01_g05410:intron_variant:-:-:-:-:-, Macma4_01_g05420:upstream_gene_variant:-:-:-:-:-
chr01	3746163	G	A	L2-1-1-1-1-1-2-2-1	ES-CN13	1	Macma4_01_g05410:upstream_gene_variant:-:-:-:-:-, Macma4_01_g05420:synonymous_variant:175:129:43:Q:caG/caA
chr01	3746164	G	A	L2-1-1-1-1-1-2-2-1	ES-CN13	1	Macma4_01_g05410:upstream_gene_variant:-:-:-:-:-, Macma4_01_g05420:missense_variant:176:130:44:G/R:Ggg/Agg
chr01	3748517	A	G	L2-1-2-1-1-1-1-1-1-2-2	PHL09	1	Macma4_01_g05410:upstream_gene_variant:-:-:-:-:-, Macma4_01_g05420:intron_variant:-:-:-:-:-
chr01	3763013	T	C	L2-1-2-1-1-1-1-1-1-1-1-2-2-2	COL04	1	Macma4_01_g05430:intron_variant:-:-:-:-:-
chr01	3765719	C	T	L2-1-2-1-1-1-1-1-1-1-1-1-1-1-1-2-2	ES-CN31,CRI05	2	Macma4_01_g05430:intron_variant:-:-:-:-:-
chr01	3766663	C	T	L2-1-1-1-1-1-2-3	ES-CN03,ES-CN04,ES-CN09,ES-CN10	4	Macma4_01_g05430:intron_variant:-:-:-:-:-
chr01	3767607	C	A	L2-1-2-1-1-1-1-1-1-1-1-2-2-1-1	GLP03	1	Macma4_01_g05430:intron_variant:-:-:-:-:-
chr01	3776203	A	T	L2-1-1-1-1-1-2-4-2-2	ES-CN11,ES-CN12	2	Macma4_01_g05430:intron_variant:-:-:-:-:-
chr01	3778292	C	T	L2-1-1-1-1-1-2-5-2-2	ES-CN23,ES-CN24	2	Macma4_01_g05430:intron_variant:-:-:-:-:-
chr01	3778823	G	A	L1-1	KOR06	1	Macma4_01_g05430:intron_variant:-:-:-:-:-
chr01	3779780	C	A	L2-1-1-1-1-3-2-2-2-2-3-2-2-1	ECU08	1	Macma4_01_g05430:intron_variant:-:-:-:-:-
chr01	3785654	G	T	L2-1-2-1-1-1-1-1-1-1-1-2-2-1-2	ES-CN19	1	Macma4_01_g05430:intron_variant:-:-:-:-:-, Macma4_01_g05440:downstream_gene_variant:-:-:-:-:-
chr01	3785978	G	GT	L2-1-2-1-1-1-1-1-1-1-1-2-2-2	COL04	1	Macma4_01_g05430:intron_variant:-:-:-:-:-, Macma4_01_g05440:downstream_gene_variant:-:-:-:-:-
chr01	3785979	C	A	L2-1-2-1-1-1-1-1-1-1-1-2-2-2	COL04	1	Macma4_01_g05430:intron_variant:-:-:-:-:-, Macma4_01_g05440:downstream_gene_variant:-:-:-:-:-
chr01	3786385	C	A	L2-1-2-1-1-1-1-1-1-1-1-1-1-1-2	NIC02	1	Macma4_01_g05430:intron_variant:-:-:-:-:-, Macma4_01_g05440:downstream_gene_variant:-:-:-:-:-
chr01	3786919	C	A	L2-1-2-1-1-1-1-1-1-1-3	HND01	1	Macma4_01_g05430:intron_variant:-:-:-:-:-, Macma4_01_g05440:downstream_gene_variant:-:-:-:-:-
chr01	3804296	AT	A	L2-1-2-1-1-1-1-1-1-1-1-1-1-1-1-3-2	ECU02	1	Macma4_01_g05450:upstream_gene_variant:-:-:-:-:-, Macma4_01_g05460:intron_variant:-:-:-:-:-
chr01	3804860	T	A	L2-1-1-1-1-1-2-3-1-1	ES-CN03	1	Macma4_01_g05450:upstream_gene_variant:-:-:-:-:-, Macma4_01_g05460:intron_variant:-:-:-:-:-
chr01	3810886	T	G	L1-2-2-2-2-1	VNM06	1	Macma4_01_g05460:intron_variant:-:-:-:-:-
chr01	3812827	C	T	L2-2-1-1-1-3	COL01	1	Macma4_01_g05460:intron_variant:-:-:-:-:-
chr01	3823705	A	C	L1-2-2-2-2-2-3-2-2	TH-KOR01,TH-KOR02,TH-KOR03,TH-KOR04,TH-KOR05,TH-KOR06,TH-KOR07,TH-KOR08	8	Macma4_01_g05470:downstream_gene_variant:-:-:-:-:-, Macma4_01_g05480:upstream_gene_variant:-:-:-:-:-
chr01	3828468	G	A	L1-2-2-2-2-1	VNM06	1	Macma4_01_g05480:synonymous_variant:1983:1695:565:R:agG/agA
chr01	3830995	C	G	L2-1-2-1-1-1-1-1-1-1-1-1-1-1-1-2-2-2	CRI05	1	Macma4_01_g05480:downstream_gene_variant:-:-:-:-:-, Macma4_01_g05490:upstream_gene_variant:-:-:-:-:-
chr01	3840604	C	G	L2-1-2-1-1-1-2-1-2	GTM03	1	Macma4_01_g05500:downstream_gene_variant:-:-:-:-:-
chr01	3842279	C	A	L2-1-2-1-1-1-1-1-1-1-1-1-1-1-1-1-1-2-1	CRI04	1	Macma4_01_g05500:3_prime_UTR_variant:1277:-:-:-:-, Macma4_01_g05510:upstream_gene_variant:-:-:-:-:-
chr01	3846849	G	A	L2-1-1-1-1-3-2-2-2-2-3-2-1-1	DOM03	1	Macma4_01_g05500:upstream_gene_variant:-:-:-:-:-, Macma4_01_g05510:missense_variant:231:115:39:G/S:Ggc/Agc, Macma4_01_g05520:upstream_gene_variant:-:-:-:-:-
chr01	3847784	G	T	L2-1-2-1-1-1-1-1-1-1-1-2-2-1-1	GLP03	1	Macma4_01_g05500:upstream_gene_variant:-:-:-:-:-, Macma4_01_g05510:intron_variant:-:-:-:-:-, Macma4_01_g05520:upstream_gene_variant:-:-:-:-:-, Macma4_01_g05530:downstream_gene_variant:-:-:-:-:-
chr01	3854425	C	A	L2-1-2-1-1-1-1-1-1-1-1-2-1-1	ECU06,ECU07,ECU09	3	Macma4_01_g05520:downstream_gene_variant:-:-:-:-:-, Macma4_01_g05530:intron_variant:-:-:-:-:-, Macma4_01_g05540:upstream_gene_variant:-:-:-:-:-
chr01	3855630	G	A	L2	AUS01,AUS02,AUS03,AUS04,AUS05,AUS06,AUS07,AUS08,AUS09,AUS10,CMR01,CMR02,ES-CN01,ES-CN02,ES-CN03,ES-CN04,ES-CN05,ES-CN06,ES-CN07,ES-CN08,ES-CN09,ES-CN10,ES-CN11,ES-CN12,ES-CN13,ES-CN14,ES-CN15,ES-CN16,ES-CN17,ES-CN18,ES-CN19,ES-CN20,ES-CN21,ES-CN22,ES-CN23,ES-CN24,ES-CN25,ES-CN26,ES-CN27,ES-CN28,ES-CN29,ES-CN30,ES-CN31,ES-CN32,COL01,COL02,COL03,COL04,COL05,COL06,COL07,CRI01,CRI02,CRI03,CRI04,CRI05…	115	Macma4_01_g05520:downstream_gene_variant:-:-:-:-:-, Macma4_01_g05530:upstream_gene_variant:-:-:-:-:-, Macma4_01_g05540:missense_variant:230:230:77:G/E:gGg/gAg
chr01	3866864	A	T	L2-1-1-1-1-1-2-4-2-2	ES-CN11,ES-CN12	2	Macma4_01_g05550:upstream_gene_variant:-:-:-:-:-, Macma4_01_g05560:intron_variant:-:-:-:-:-
chr01	3874455	G	T	L2-1-1-1-1-3-2-2-2-2-3-2-2	CMR01,CMR02,ECU08,GHA03	4	Macma4_01_g05560:intron_variant:-:-:-:-:-, Macma4_01_g05570:upstream_gene_variant:-:-:-:-:-
chr01	3878125	T	C	L2-1-1-1-1-3-2-2-1-2-1	NIC01	1	Macma4_01_g05560:upstream_gene_variant:-:-:-:-:-, Macma4_01_g05570:intron_variant:-:-:-:-:-
chr01	3903228	C	T	L1-2-2-2-1	VNM04	1	Macma4_01_g05600:downstream_gene_variant:-:-:-:-:-, Macma4_01_g05610:upstream_gene_variant:-:-:-:-:-, Macma4_01_g05630:synonymous_variant:750:735:245:S:tcG/tcA, Macma4_01_g05640:downstream_gene_variant:-:-:-:-:-
chr01	3907139	G	T	L2-1-2-1-1-1-1-1-1-1-1-1-1-2	GLP01	1	Macma4_01_g05630:upstream_gene_variant:-:-:-:-:-, Macma4_01_g05640:3_prime_UTR_variant:1031:-:-:-:-
chr01	3908073	A	C	L2-1-2-1-1-1-1-1-1-1-1-1-2-2	KOR03	1	Macma4_01_g05630:upstream_gene_variant:-:-:-:-:-, Macma4_01_g05640:intron_variant:-:-:-:-:-
chr01	3909597	A	C	L2-1-2-1-1-1-1-1-1-1-1-2-2-1-2	ES-CN19	1	Macma4_01_g05620:downstream_gene_variant:-:-:-:-:-, Macma4_01_g05630:upstream_gene_variant:-:-:-:-:-, Macma4_01_g05640:intron_variant:-:-:-:-:-
chr01	3922907	C	T	L2-1-2-1-1-1-1-1-1-1-1-1-2-1	KOR04	1	Macma4_01_g05620:5_prime_UTR_variant:51:-:-:-:-, Macma4_01_g05650:downstream_gene_variant:-:-:-:-:-, Macma4_01_g05660:downstream_gene_variant:-:-:-:-:-
chr01	3925319	A	T	L2-1-2-1-1-1-1-1-1-1-1-1-1-2	GLP01	1	Macma4_01_g05620:upstream_gene_variant:-:-:-:-:-, Macma4_01_g05650:intron_variant:-:-:-:-:-, Macma4_01_g05660:downstream_gene_variant:-:-:-:-:-
chr01	3925552	C	T	L2-1-2-1-1-1-1-1-1-1-1-1-1-1-1-1-1-1-2	CRI09	1	Macma4_01_g05620:upstream_gene_variant:-:-:-:-:-, Macma4_01_g05650:intron_variant:-:-:-:-:-, Macma4_01_g05660:missense_variant:152:152:51:R/Q:cGg/cAg
chr01	3928621	G	C	L2-1-2-1-1-1-1-1-1-1-1-2-1-1	ECU06,ECU07,ECU09	3	Macma4_01_g05650:missense_variant:2024:1848:616:S/R:agC/agG, Macma4_01_g05660:upstream_gene_variant:-:-:-:-:-
chr01	3928622	C	A	L2-1-2-1-1-1-1-1-1-1-1-2-1-1	ECU06,ECU07,ECU09	3	Macma4_01_g05650:missense_variant:2023:1847:616:S/I:aGc/aTc, Macma4_01_g05660:upstream_gene_variant:-:-:-:-:-
chr01	3942939	G	A	L2-1-2-1-1-1-1-1-1-1-1-1-1-1-1-1-1-1	CRI09,CRI10	2	Macma4_01_g05680:downstream_gene_variant:-:-:-:-:-, Macma4_01_g05690:upstream_gene_variant:-:-:-:-:-
chr01	3945498	G	A	L2-2-2	GTM02,MEX01,UKN01,UKN02	4	Macma4_01_g05680:downstream_gene_variant:-:-:-:-:-, Macma4_01_g05690:downstream_gene_variant:-:-:-:-:-, Macma4_01_g05700:upstream_gene_variant:-:-:-:-:-
chr01	3948997	C	T	L1-1	KOR06	1	Macma4_01_g05690:downstream_gene_variant:-:-:-:-:-, Macma4_01_g05700:upstream_gene_variant:-:-:-:-:-
chr01	3951468	T	C	L2-1-1-1-1-1-2-4-2-1	ES-CN15	1	Macma4_01_g05700:downstream_gene_variant:-:-:-:-:-, Macma4_01_g05710:upstream_gene_variant:-:-:-:-:-
chr01	3958477	C	T	L2-1-1-1-1-1-2-2-1	ES-CN13	1	Macma4_01_g05710:intron_variant:-:-:-:-:-
chr01	3961108	C	T	L1-2-1-2-2-1	VNM09	1	Macma4_01_g05710:intron_variant:-:-:-:-:-
chr01	3965874	A	C	L1-2-2-2-2-1	VNM06	1	Macma4_01_g05710:3_prime_UTR_variant:1830:-:-:-:-, Macma4_01_g05720:upstream_gene_variant:-:-:-:-:-
chr01	3966707	T	C	L1-2-2-2-2-2-1	CHN01	1	Macma4_01_g05710:downstream_gene_variant:-:-:-:-:-, Macma4_01_g05720:missense_variant:303:104:35:I/T:aTc/aCc
chr01	3967593	T	C	L2-1-1-1-1-3-2-2-2-2-2-2-3-2-1	AUS04	1	Macma4_01_g05710:downstream_gene_variant:-:-:-:-:-, Macma4_01_g05720:intron_variant:-:-:-:-:-
chr01	3968469	G	T	L1-1	KOR06	1	Macma4_01_g05710:downstream_gene_variant:-:-:-:-:-, Macma4_01_g05720:intron_variant:-:-:-:-:-
chr01	3973170	C	A	L2-1-2-1-1-1-1-1-2-2	CRI02	1	Macma4_01_g05720:intron_variant:-:-:-:-:-, Macma4_01_g05730:downstream_gene_variant:-:-:-:-:-
chr01	3974161	T	A	L2-1-2-1-1-1-1-1-1-2-2	PHL09	1	Macma4_01_g05720:downstream_gene_variant:-:-:-:-:-, Macma4_01_g05730:downstream_gene_variant:-:-:-:-:-
chr01	3980580	G	A	L2-1-2-1-1-1-1-1-2-1	CRI08	1	Macma4_01_g05730:upstream_gene_variant:-:-:-:-:-, Macma4_01_g05740:downstream_gene_variant:-:-:-:-:-
chr01	3982972	G	A	L1-2-2-2-2-2-3-2-2-2	TH-KOR03,TH-KOR05,TH-KOR06,TH-KOR07,TH-KOR08	5	Macma4_01_g05730:upstream_gene_variant:-:-:-:-:-, Macma4_01_g05740:synonymous_variant:2239:2055:685:G:ggC/ggT
chr01	3999394	G	T	L2-1-2-1-1-1-1-1-1-1-1-2-1-3	HND02	1	Macma4_01_g05740:upstream_gene_variant:-:-:-:-:-, Macma4_01_g05750:intron_variant:-:-:-:-:-, Macma4_01_g05760:upstream_gene_variant:-:-:-:-:-
chr01	4000327	C	T	L2-1-2-1-1-1-1-1-1-1-1-1-1-1-1-2-2-1	ES-CN31	1	Macma4_01_g05750:intron_variant:-:-:-:-:-, Macma4_01_g05760:upstream_gene_variant:-:-:-:-:-
chr01	4009949	C	T	L1-2-2-2-2-2-3-1-2	CHN04	1	Macma4_01_g05760:downstream_gene_variant:-:-:-:-:-, Macma4_01_g05770:synonymous_variant:548:345:115:V:gtC/gtT
chr01	4018970	T	C	L2-1-2-1-1-1-1-1-1-2-2	PHL09	1	Macma4_01_g05770:downstream_gene_variant:-:-:-:-:-, Macma4_01_g05780:intron_variant:-:-:-:-:-
chr01	4023969	G	T	L2-1-1-1-1-1-2-3-2-1	ES-CN09	1	Macma4_01_g05780:intron_variant:-:-:-:-:-
chr01	4031543	C	T	L2-1-2-1-1-1-1-1-1-1-1-1-2	KOR03,KOR04	2	Macma4_01_g05780:downstream_gene_variant:-:-:-:-:-, Macma4_01_g05790:intron_variant:-:-:-:-:-, Macma4_01_g05800:upstream_gene_variant:-:-:-:-:-, Macma4_01_g05810:downstream_gene_variant:-:-:-:-:-
chr01	4033896	C	T	L2-1-2-1-1-1-1-1-1-1-2-2	CRI01	1	Macma4_01_g05780:downstream_gene_variant:-:-:-:-:-, Macma4_01_g05790:intron_variant:-:-:-:-:-, Macma4_01_g05800:upstream_gene_variant:-:-:-:-:-, Macma4_01_g05810:downstream_gene_variant:-:-:-:-:-
chr01	4039413	C	T	L2-1-2-1-1-1-1-1-1-1-1-2-1-1	ECU06,ECU07,ECU09	3	Macma4_01_g05790:downstream_gene_variant:-:-:-:-:-, Macma4_01_g05800:downstream_gene_variant:-:-:-:-:-, Macma4_01_g05810:intron_variant:-:-:-:-:-
chr01	4040690	C	T	L2-1-2-1-1-1-1-1-1-1-1-2-1	ECU06,ECU07,ECU09,GHA04,HND02	5	Macma4_01_g05800:downstream_gene_variant:-:-:-:-:-, Macma4_01_g05810:intron_variant:-:-:-:-:-
chr01	4043467	C	A	L1-2-2-2-2-2-2-1-2	VNM03,VNM02	2	Macma4_01_g05810:missense_variant:331:185:62:S/I:aGt/aTt
chr01	4051758	C	T	L2-1-2-1-1-1-1-1-1-1-1-1-1-1-1-1-2	COL07	1	Macma4_01_g05820:downstream_gene_variant:-:-:-:-:-, Macma4_01_g05830:intron_variant:-:-:-:-:-, Macma4_01_g05840:upstream_gene_variant:-:-:-:-:-
chr01	4053092	C	A	L1-2-1-2-1	PHL10	1	Macma4_01_g05820:downstream_gene_variant:-:-:-:-:-, Macma4_01_g05830:intron_variant:-:-:-:-:-, Macma4_01_g05840:upstream_gene_variant:-:-:-:-:-
chr01	4053209	G	T	L2-1-2-1-1-1-1-1-1-1-1-2-1-3	HND02	1	Macma4_01_g05820:downstream_gene_variant:-:-:-:-:-, Macma4_01_g05830:intron_variant:-:-:-:-:-, Macma4_01_g05840:upstream_gene_variant:-:-:-:-:-
chr01	4054385	G	A	L2-1-1-1-1-3-1	AUS09	1	Macma4_01_g05820:downstream_gene_variant:-:-:-:-:-, Macma4_01_g05830:5_prime_UTR_variant:32:-:-:-:-, Macma4_01_g05840:upstream_gene_variant:-:-:-:-:-, Macma4_01_g05850:upstream_gene_variant:-:-:-:-:-
chr01	4057459	A	T	L1-2-1-2-1	PHL10	1	Macma4_01_g05830:upstream_gene_variant:-:-:-:-:-, Macma4_01_g05840:intron_variant:-:-:-:-:-, Macma4_01_g05850:upstream_gene_variant:-:-:-:-:-, Macma4_01_g05860:upstream_gene_variant:-:-:-:-:-
chr01	4059519	G	T	L2-1-1-1-1-3-2-2-2-2-3-2-2	CMR01,CMR02,ECU08,GHA03	4	Macma4_01_g05840:downstream_gene_variant:-:-:-:-:-, Macma4_01_g05850:missense_variant:479:401:134:C/F:tGc/tTc, Macma4_01_g05860:upstream_gene_variant:-:-:-:-:-
chr01	4066144	C	G	L2-1-1-1-1-1-1-2-2	ENG05,ENG03	2	Macma4_01_g05860:downstream_gene_variant:-:-:-:-:-, Macma4_01_g05870:5_prime_UTR_variant:8:-:-:-:-
chr01	4067760	G	T	L2-1-1-1-1-3-2-2-1-2-2	ES-CN21,ES-CN22	2	Macma4_01_g05860:downstream_gene_variant:-:-:-:-:-, Macma4_01_g05870:intron_variant:-:-:-:-:-
chr01	4067794	A	T	L2-1-1-1-1-3-2-2-1-2-2-1	ES-CN21	1	Macma4_01_g05860:downstream_gene_variant:-:-:-:-:-, Macma4_01_g05870:intron_variant:-:-:-:-:-
chr01	4095986	C	T	L2-1-2-1-1-1-1-1-1-1-1-1-1-1-1-3	ECU02,ECU03	2	Macma4_01_g05870:downstream_gene_variant:-:-:-:-:-, Macma4_01_g05880:missense_variant:541:215:72:T/I:aCc/aTc, Macma4_01_g05890:downstream_gene_variant:-:-:-:-:-, Macma4_01_g05900:downstream_gene_variant:-:-:-:-:-
chr01	4097580	T	G	L2-1-2-1-1-1-1-1-1-1-1-1-1-1-1-1-2	COL07	1	Macma4_01_g05870:downstream_gene_variant:-:-:-:-:-, Macma4_01_g05880:downstream_gene_variant:-:-:-:-:-, Macma4_01_g05890:downstream_gene_variant:-:-:-:-:-, Macma4_01_g05900:downstream_gene_variant:-:-:-:-:-
chr01	4104492	A	G	L2-1-1-1-1-2-2-1	COL03	1	Macma4_01_g05900:upstream_gene_variant:-:-:-:-:-, Macma4_01_g05910:downstream_gene_variant:-:-:-:-:-
chr01	4106068	A	G	L2-1-2-2-1-1-1	PER05	1	Macma4_01_g05910:downstream_gene_variant:-:-:-:-:-
chr01	4106544	C	A	L1-2-2-2-2-1	VNM06	1	Macma4_01_g05910:3_prime_UTR_variant:895:-:-:-:-
chr01	4111371	C	A	L2-1-2-1-1-1-1-1-1-1-2-1-2	PHL03	1	Macma4_01_g05910:intron_variant:-:-:-:-:-, Macma4_01_g05920:upstream_gene_variant:-:-:-:-:-
chr01	4120155	T	A	L2-1-1-1-1-3-2-2-1-2-2-2	ES-CN22	1	Macma4_01_g05920:downstream_gene_variant:-:-:-:-:-, Macma4_01_g05930:5_prime_UTR_variant:32:-:-:-:-
chr01	4126183	C	T	L2-2-1-1-1-3	COL01	1	Macma4_01_g05930:intron_variant:-:-:-:-:-, Macma4_01_g05940:upstream_gene_variant:-:-:-:-:-
chr01	4126449	A	G	L2-1-2-1-1-1-1-1-1-1-1-1-1-1-1-1-2	COL07	1	Macma4_01_g05930:intron_variant:-:-:-:-:-, Macma4_01_g05940:upstream_gene_variant:-:-:-:-:-
chr01	4128139	G	A	L2-1-2-1-1-1-1-1-1-2-1	PAN01	1	Macma4_01_g05930:downstream_gene_variant:-:-:-:-:-, Macma4_01_g05940:upstream_gene_variant:-:-:-:-:-
chr01	4134228	C	T	L1-2-2-2-2-2-3-1-2	CHN04	1	Macma4_01_g05940:intron_variant:-:-:-:-:-
chr01	4134868	A	C	L2-1-1-1-1-3-2-2-2-2-3-2-1-2-1	KOR02	1	Macma4_01_g05940:intron_variant:-:-:-:-:-
chr01	4137470	G	A	L2-1-2-1-1-1-1-1-1-1-1-1-1-1-1-1-2	COL07	1	Macma4_01_g05940:missense_variant:980:931:311:D/N:Gat/Aat
chr01	4138362	T	G	L2-1-2-1-1-1-1-1-1-1-1-2-1-2	GHA04	1	Macma4_01_g05940:intron_variant:-:-:-:-:-
chr01	4144775	T	G	L2-1-2-1-1-1-1-1-1-1-1-2-1-1-2	ECU06	1	Macma4_01_g05940:intron_variant:-:-:-:-:-
chr01	4145944	G	T	L2-1-1-1-1-2-2	COL03,GLP02	2	Macma4_01_g05940:intron_variant:-:-:-:-:-
chr01	4146972	G	T	L2-1-1-1-1-3-2-2-2-2-3-2-2-2-1	CMR02	1	Macma4_01_g05940:intron_variant:-:-:-:-:-, Macma4_01_g05950:downstream_gene_variant:-:-:-:-:-
chr01	4152175	A	G	L2-1-2-1-1-1-1-1-1-2-1	PAN01	1	Macma4_01_g05940:downstream_gene_variant:-:-:-:-:-, Macma4_01_g05950:splice_donor_variant:-:-:-:-:-
chr01	4155418	A	G	L2-1-1-1-1-1-2-2-2	ES-CN14	1	Macma4_01_g05950:upstream_gene_variant:-:-:-:-:-, Macma4_01_g05960:downstream_gene_variant:-:-:-:-:-
chr01	4157877	T	A	L1-1	KOR06	1	Macma4_01_g05950:upstream_gene_variant:-:-:-:-:-, Macma4_01_g05960:downstream_gene_variant:-:-:-:-:-
chr01	4158710	C	A	L2-1-2-1-1-1-1-1-1-1-1-2-2-2	COL04	1	Macma4_01_g05960:downstream_gene_variant:-:-:-:-:-
chr01	4175784	G	A	L1-2-2-2-2-2-2-2-2-2	VNM07	1	Macma4_01_g05980:intron_variant:-:-:-:-:-, Macma4_01_g05990:intron_variant:-:-:-:-:-
chr01	4176061	C	A	L2-1-2-1-1-1-1-1-1-1-1-1-1-1-1-2-1-2	ES-CN25	1	Macma4_01_g05980:intron_variant:-:-:-:-:-, Macma4_01_g05990:intron_variant:-:-:-:-:-
chr01	4176884	C	A	L2-1-2-1-2	GTM01	1	Macma4_01_g05980:intron_variant:-:-:-:-:-, Macma4_01_g05990:intron_variant:-:-:-:-:-
chr01	4179336	C	T	L2-1-1-1-1-3-2-2-1-2-2	ES-CN21,ES-CN22	2	Macma4_01_g05980:synonymous_variant:391:312:104:D:gaC/gaT, Macma4_01_g05990:intron_variant:-:-:-:-:-
chr01	4181868	A	C	L2-1-2-2-1-1-1	PER05	1	Macma4_01_g05980:downstream_gene_variant:-:-:-:-:-, Macma4_01_g05990:intron_variant:-:-:-:-:-, Macma4_01_g06000:downstream_gene_variant:-:-:-:-:-
chr01	4195078	C	T	L2-1-1-1-1-3-2-2-2-2-2-2-3-2-1	AUS04	1	Macma4_01_g06010:intron_variant:-:-:-:-:-, Macma4_01_g06020:upstream_gene_variant:-:-:-:-:-
chr01	4200260	G	C	L1-2-2-2-2-2-3-2-2-1-2-1	TH-KOR02	1	Macma4_01_g06010:upstream_gene_variant:-:-:-:-:-, Macma4_01_g06020:downstream_gene_variant:-:-:-:-:-, Macma4_01_g06030:upstream_gene_variant:-:-:-:-:-
chr01	4205347	G	T	L1-2-2-2-2-2-3-2-2-2-2-1	TH-KOR07	1	Macma4_01_g06030:missense_variant:480:427:143:D/Y:Gat/Tat
chr01	4209225	C	T	L2-1-1-1-1-3-2-2-2-2-3-2-2	CMR01,CMR02,ECU08,GHA03	4	Macma4_01_g06030:intron_variant:-:-:-:-:-, Macma4_01_g06040:downstream_gene_variant:-:-:-:-:-
chr01	4215108	G	A	L2-1-2-1-1-1-1-1-1-1-1-1-1-1-1-2-1-2	ES-CN25	1	Macma4_01_g06030:downstream_gene_variant:-:-:-:-:-, Macma4_01_g06040:intron_variant:-:-:-:-:-, Macma4_01_g06050:upstream_gene_variant:-:-:-:-:-
chr01	4216062	A	G	L2-1-2-1-1-1-1-1-2	CRI02,CRI08	2	Macma4_01_g06030:downstream_gene_variant:-:-:-:-:-, Macma4_01_g06040:synonymous_variant:391:186:62:G:ggT/ggC, Macma4_01_g06050:upstream_gene_variant:-:-:-:-:-
chr01	4221431	C	A	L2-1-1-1-1-1-2-3-1	ES-CN03,ES-CN04	2	Macma4_01_g06040:upstream_gene_variant:-:-:-:-:-, Macma4_01_g06050:splice_region_variant,splice_polypyrimidine_tract_variant,intron_variant:-:-:-:-:-, Macma4_01_g06060:downstream_gene_variant:-:-:-:-:-
chr01	4225268	A	T	L2-1-1-1-1-3-2-2-2-1	PHL08	1	Macma4_01_g06050:downstream_gene_variant:-:-:-:-:-, Macma4_01_g06060:3_prime_UTR_variant:2803:-:-:-:-
chr01	4254203	G	A	L2-1-1-1-2-1-2	ES-CN17	1	Macma4_01_g06080:3_prime_UTR_variant:1076:-:-:-:-
chr01	4267086	A	T	L1-2-2-2-2-2-3-1-1	CHN03	1	Macma4_01_g06100:downstream_gene_variant:-:-:-:-:-, Macma4_01_g06110:downstream_gene_variant:-:-:-:-:-
chr01	4267300	A	T	L2-1-2-1-1-1-1-1-1-1-1-1-1-1-1-3-1	ECU03	1	Macma4_01_g06100:downstream_gene_variant:-:-:-:-:-, Macma4_01_g06110:downstream_gene_variant:-:-:-:-:-
chr01	4267900	G	A	L2-1-2-1-1-1-1-1-1-1-1-2-2-2	COL04	1	Macma4_01_g06100:downstream_gene_variant:-:-:-:-:-, Macma4_01_g06110:downstream_gene_variant:-:-:-:-:-
chr01	4268215	C	T	L2-1-2-1-1-1-1-1-1-1-1-2-2-1-2	ES-CN19	1	Macma4_01_g06100:downstream_gene_variant:-:-:-:-:-, Macma4_01_g06110:downstream_gene_variant:-:-:-:-:-
chr01	4276439	G	A	L2-1-2-1-1-1-1-1-1-1-1-2-1-3	HND02	1	Macma4_01_g06110:upstream_gene_variant:-:-:-:-:-, Macma4_01_g06120:missense_variant:957:922:308:V/I:Gtt/Att, Macma4_01_g06130:upstream_gene_variant:-:-:-:-:-
chr01	4282435	A	T	L1-2-2-2-2-2-3-2-2-2-2-2	TH-KOR03,TH-KOR05	2	Macma4_01_g06120:downstream_gene_variant:-:-:-:-:-, Macma4_01_g06130:downstream_gene_variant:-:-:-:-:-, Macma4_01_g06140:3_prime_UTR_variant:1875:-:-:-:-
chr01	4282807	C	T	L2-2-2-2-1	MEX01	1	Macma4_01_g06120:downstream_gene_variant:-:-:-:-:-, Macma4_01_g06130:downstream_gene_variant:-:-:-:-:-, Macma4_01_g06140:synonymous_variant:1503:1431:477:G:ggG/ggA
chr01	4288449	T	TC	L1-2-2-2-2-2-3-2-1-2	CHN02	1	Macma4_01_g06140:upstream_gene_variant:-:-:-:-:-, Macma4_01_g06150:frameshift_variant:781-782:545-546:182:R/RX:aga/agGa
chr01	4289303	A	T	L2-1-1-1-1-3-2-2-2-2-3-1	COL05	1	Macma4_01_g06140:upstream_gene_variant:-:-:-:-:-, Macma4_01_g06150:intron_variant:-:-:-:-:-
chr01	4290369	A	C	L2-1-1-1-1-2-2-1	COL03	1	Macma4_01_g06150:intron_variant:-:-:-:-:-, Macma4_01_g06160:downstream_gene_variant:-:-:-:-:-
chr01	4292650	G	T	L2-1-1-1-1-3-2-2-2-2-3-2-1-1	DOM03	1	Macma4_01_g06150:upstream_gene_variant:-:-:-:-:-, Macma4_01_g06160:downstream_gene_variant:-:-:-:-:-
chr01	4295152	C	T	L1-2-1-2-1	PHL10	1	Macma4_01_g06150:upstream_gene_variant:-:-:-:-:-, Macma4_01_g06160:intron_variant:-:-:-:-:-
chr01	4298283	G	A	L1-2-1-2-2-1	VNM09	1	Macma4_01_g06160:intron_variant:-:-:-:-:-
chr01	4302230	G	T	L2-1-1-1-1-3-2-2-2-2-1	AUS02	1	Macma4_01_g06160:intron_variant:-:-:-:-:-
chr01	4302694	A	T	L2-1-2-1-1-1-1-1-2-2	CRI02	1	Macma4_01_g06160:intron_variant:-:-:-:-:-
chr01	4308917	T	C	L2-1-2-1-1-1-1-1-2	CRI02,CRI08	2	Macma4_01_g06160:upstream_gene_variant:-:-:-:-:-, Macma4_01_g06170:upstream_gene_variant:-:-:-:-:-
chr01	4313779	CAGGCGGAGGAGGACGCCGACGCGG	C	L2-1-1-1-1-3-2-2-1-2-1	NIC01	1	Macma4_01_g06160:upstream_gene_variant:-:-:-:-:-, Macma4_01_g06170:inframe_deletion:520-543:350-373:117-125:QAEEDADAE/Q:cAGGCGGAGGAGGACGCCGACGCGGag/cag
chr01	4318955	C	T	L1-2-2-1	PHL01	1	Macma4_01_g06170:downstream_gene_variant:-:-:-:-:-, Macma4_01_g06180:upstream_gene_variant:-:-:-:-:-
chr01	4337340	A	T	L2-1-2-1-1-1-1-1-1-1-1-1-1-1-1-2-1	ES-CN25,ES-CN26	2	Macma4_01_g06190:downstream_gene_variant:-:-:-:-:-, Macma4_01_g06200:missense_variant:1115:1115:372:Q/L:cAg/cTg
chr01	4340486	G	A	L1-2-2-2-2-2-3-1-2	CHN04	1	Macma4_01_g06200:3_prime_UTR_variant:3002:-:-:-:-, Macma4_01_g06210:downstream_gene_variant:-:-:-:-:-
chr01	4341376	C	A	L2-1-2-1-1-1-1-1-1-1-1-2-1-2	GHA04	1	Macma4_01_g06200:downstream_gene_variant:-:-:-:-:-, Macma4_01_g06210:downstream_gene_variant:-:-:-:-:-
chr01	4343849	G	C	L2-1-2-1-1-1-1-1-1-1-1-2-2-2	COL04	1	Macma4_01_g06200:downstream_gene_variant:-:-:-:-:-, Macma4_01_g06210:downstream_gene_variant:-:-:-:-:-, Macma4_01_g06220:downstream_gene_variant:-:-:-:-:-
chr01	4346309	C	A	L2-1-2-1-1-1-1-1-1-1-1-2-1-3	HND02	1	Macma4_01_g06210:upstream_gene_variant:-:-:-:-:-, Macma4_01_g06220:downstream_gene_variant:-:-:-:-:-, Macma4_01_g06230:upstream_gene_variant:-:-:-:-:-
chr01	4347500	T	C	L2-1-2-1-1-1-1-1-1-1-1-2-1-1	ECU06,ECU07,ECU09	3	Macma4_01_g06210:upstream_gene_variant:-:-:-:-:-, Macma4_01_g06220:downstream_gene_variant:-:-:-:-:-, Macma4_01_g06230:upstream_gene_variant:-:-:-:-:-
chr01	4347732	A	C	L2-2-1-1-1-1-1	COL06	1	Macma4_01_g06210:upstream_gene_variant:-:-:-:-:-, Macma4_01_g06220:downstream_gene_variant:-:-:-:-:-, Macma4_01_g06230:upstream_gene_variant:-:-:-:-:-
chr01	4351922	G	A	L2-2-1-2	COL02	1	Macma4_01_g06220:upstream_gene_variant:-:-:-:-:-, Macma4_01_g06230:3_prime_UTR_variant:1634:-:-:-:-
chr01	4361351	G	C	L1-2-2-2-2-2-3-2-2-1	TH-KOR01,TH-KOR02,TH-KOR04	3	Macma4_01_g06240:missense_variant:1574:1374:458:K/N:aaG/aaC
chr01	4366451	C	A	L2-1-1-1-1-3-2-2-2-2-3-2-1-2	KOR02,KOR05	2	Macma4_01_g06240:downstream_gene_variant:-:-:-:-:-, Macma4_01_g06250:upstream_gene_variant:-:-:-:-:-
chr01	4373322	T	A	L1-2-2-2-2-2-3-1-2	CHN04	1	Macma4_01_g06250:3_prime_UTR_variant:1644:-:-:-:-, Macma4_01_g06260:downstream_gene_variant:-:-:-:-:-
chr01	4375808	A	C	L2-1-1-1-1-2-1	ES-CN20	1	Macma4_01_g06250:downstream_gene_variant:-:-:-:-:-, Macma4_01_g06260:downstream_gene_variant:-:-:-:-:-
chr01	4376442	T	G	L1-2-2-2-2-2-2-2-2-1	CHN05	1	Macma4_01_g06250:downstream_gene_variant:-:-:-:-:-, Macma4_01_g06260:downstream_gene_variant:-:-:-:-:-
chr01	4385251	G	A	L1-2-2-2-2-1	VNM06	1	Macma4_01_g06270:intron_variant:-:-:-:-:-, Macma4_01_g06280:downstream_gene_variant:-:-:-:-:-
chr01	4385252	A	T	L1-2-2-2-2-1	VNM06	1	Macma4_01_g06270:intron_variant:-:-:-:-:-, Macma4_01_g06280:downstream_gene_variant:-:-:-:-:-
chr01	4387410	G	A	L1-2-1-2-1	PHL10	1	Macma4_01_g06270:intron_variant:-:-:-:-:-, Macma4_01_g06280:downstream_gene_variant:-:-:-:-:-
chr01	4395599	T	G	L1-2-2-2-2-2-1	CHN01	1	Macma4_01_g06270:downstream_gene_variant:-:-:-:-:-, Macma4_01_g06290:downstream_gene_variant:-:-:-:-:-
chr01	4395703	T	C	L1-2-2-2-2-1	VNM06	1	Macma4_01_g06270:downstream_gene_variant:-:-:-:-:-, Macma4_01_g06290:downstream_gene_variant:-:-:-:-:-
chr01	4398923	A	G	L1-2-2-2-2-2-3-1-1	CHN03	1	Macma4_01_g06270:downstream_gene_variant:-:-:-:-:-, Macma4_01_g06290:intron_variant:-:-:-:-:-, Macma4_01_g06300:downstream_gene_variant:-:-:-:-:-
chr01	4401630	T	A	L2-1-2-1-1-1-1-1-1-1-1-2-1-3	HND02	1	Macma4_01_g06290:intron_variant:-:-:-:-:-, Macma4_01_g06300:downstream_gene_variant:-:-:-:-:-, Macma4_01_g06310:downstream_gene_variant:-:-:-:-:-
chr01	4401791	G	A	L2-1-2-1-1-1-1-1-2	CRI02,CRI08	2	Macma4_01_g06290:intron_variant:-:-:-:-:-, Macma4_01_g06300:downstream_gene_variant:-:-:-:-:-, Macma4_01_g06310:downstream_gene_variant:-:-:-:-:-
chr01	4405208	CG	C	L1-2-1-1	KOR01	1	Macma4_01_g06290:upstream_gene_variant:-:-:-:-:-, Macma4_01_g06300:upstream_gene_variant:-:-:-:-:-, Macma4_01_g06310:downstream_gene_variant:-:-:-:-:-
chr01	4405796	A	T	L2-1-2-1-1-1-1-1-2-2	CRI02	1	Macma4_01_g06290:upstream_gene_variant:-:-:-:-:-, Macma4_01_g06300:upstream_gene_variant:-:-:-:-:-, Macma4_01_g06310:downstream_gene_variant:-:-:-:-:-
chr01	4408955	G	C	L2-1-2-1-1-1-2-1-2	GTM03	1	Macma4_01_g06300:upstream_gene_variant:-:-:-:-:-, Macma4_01_g06310:missense_variant:3663:3089:1030:A/G:gCt/gGt
chr01	4415764	G	T	L2-1-2-1-1-1-1-1-1-1-1-2-2-2	COL04	1	Macma4_01_g06310:intron_variant:-:-:-:-:-, Macma4_01_g06320:upstream_gene_variant:-:-:-:-:-
chr01	4432092	C	A	L2-1-1-1-1-2-2	COL03,GLP02	2	Macma4_01_g06340:intron_variant:-:-:-:-:-
chr01	4439640	A	G	L1-2-2-2-2-1	VNM06	1	Macma4_01_g06340:intron_variant:-:-:-:-:-
chr01	4458451	C	A	L2-1-2-2-1-1-1	PER05	1	Macma4_01_g06360:upstream_gene_variant:-:-:-:-:-, Macma4_01_g06380:upstream_gene_variant:-:-:-:-:-
chr01	4476638	T	A	L1-2-2-2-2-2-3-2-2	TH-KOR01,TH-KOR02,TH-KOR03,TH-KOR04,TH-KOR05,TH-KOR06,TH-KOR07,TH-KOR08	8	Macma4_01_g06390:downstream_gene_variant:-:-:-:-:-, Macma4_01_g06400:intron_variant:-:-:-:-:-
chr01	4477639	T	C	L2-1-1-1-1-3-2-2-1-2-1	NIC01	1	Macma4_01_g06390:downstream_gene_variant:-:-:-:-:-, Macma4_01_g06400:intron_variant:-:-:-:-:-
chr01	4488229	T	G	L2-1-1-1-1-3-2-2-2-2-3-2-2	CMR01,CMR02,ECU08,GHA03	4	Macma4_01_g06400:intron_variant:-:-:-:-:-
chr01	4492780	C	G	L1-2-2-2-2-2-2-2-2-1	CHN05	1	Macma4_01_g06400:upstream_gene_variant:-:-:-:-:-
chr01	4493235	G	A	L2-2-2-2-1	MEX01	1	Macma4_01_g06400:upstream_gene_variant:-:-:-:-:-
chr01	4497919	G	T	L2-1-2-1-1-1-1-1-1-1-1-1-1-1-1-1-1-1	CRI09,CRI10	2	Macma4_01_g06420:downstream_gene_variant:-:-:-:-:-
chr01	4501338	G	T	L2-1-1-1-1-3-2-2-1-2-2-2	ES-CN22	1	Macma4_01_g06420:intron_variant:-:-:-:-:-
chr01	4504277	A	AT	L2-1-1-1-1-3-2-2-2-2-2-2-2	AUS05	1	Macma4_01_g06410:downstream_gene_variant:-:-:-:-:-, Macma4_01_g06420:intron_variant:-:-:-:-:-
chr01	4507484	A	G	L1-2-2-2-1	VNM04	1	Macma4_01_g06410:downstream_gene_variant:-:-:-:-:-, Macma4_01_g06420:intron_variant:-:-:-:-:-
chr01	4512254	C	T	L1-2-2-2-2-2-3-1-1	CHN03	1	Macma4_01_g06410:synonymous_variant:1262:1005:335:K:aaG/aaA, Macma4_01_g06420:upstream_gene_variant:-:-:-:-:-, Macma4_01_g06430:downstream_gene_variant:-:-:-:-:-
chr01	4522569	G	A	L1-2-2-2-2-2-3-2-2	TH-KOR01,TH-KOR02,TH-KOR03,TH-KOR04,TH-KOR05,TH-KOR06,TH-KOR07,TH-KOR08	8	Macma4_01_g06430:upstream_gene_variant:-:-:-:-:-, Macma4_01_g06440:intron_variant:-:-:-:-:-
chr01	4529994	T	C	L2-1-2-1-1-1-1-1-1-2-2	PHL09	1	Macma4_01_g06440:intron_variant:-:-:-:-:-
chr01	4534520	A	C	L2-1-1-1-1-3-2-2-2-2-2-2-2	AUS05	1	Macma4_01_g06440:intron_variant:-:-:-:-:-, Macma4_01_g06450:downstream_gene_variant:-:-:-:-:-
chr01	4537005	C	G	L1-2-2-2-2-2-2-2-1	VNM10	1	Macma4_01_g06440:upstream_gene_variant:-:-:-:-:-, Macma4_01_g06450:downstream_gene_variant:-:-:-:-:-
chr01	4549525	C	T	L2-1-2-1-1-1-1-1-1-1-3	HND01	1	Macma4_01_g06450:intron_variant:-:-:-:-:-
chr01	4557654	A	T	L2-1-1-1-1-2-2	COL03,GLP02	2	Macma4_01_g06450:upstream_gene_variant:-:-:-:-:-, Macma4_01_g06460:upstream_gene_variant:-:-:-:-:-
chr01	4565131	T	G	L2-1-2-1-1-1-1-1-1-1-1-2-1-1	ECU06,ECU07,ECU09	3	Macma4_01_g06460:missense_variant:3013:2928:976:F/L:ttT/ttG, Macma4_01_g06470:upstream_gene_variant:-:-:-:-:-
chr01	4567400	T	C	L1-2-2-2-2-1	VNM06	1	Macma4_01_g06460:downstream_gene_variant:-:-:-:-:-, Macma4_01_g06470:intron_variant:-:-:-:-:-
chr01	4568586	T	A	L1-2-2-2-2-2-2-2	CHN05,VNM10,VNM07	3	Macma4_01_g06460:downstream_gene_variant:-:-:-:-:-, Macma4_01_g06470:intron_variant:-:-:-:-:-
chr01	4569266	C	T	L2-1-2-1-1-1-1-1-1-2-2	PHL09	1	Macma4_01_g06460:downstream_gene_variant:-:-:-:-:-, Macma4_01_g06470:intron_variant:-:-:-:-:-
chr01	4569502	G	C	L1-2-2-2-2-1	VNM06	1	Macma4_01_g06460:downstream_gene_variant:-:-:-:-:-, Macma4_01_g06470:intron_variant:-:-:-:-:-
chr01	4575842	T	A	L2-1-2-1-1-1-1-1-1-1-1-1-1-1-1-2-2-2	CRI05	1	Macma4_01_g06470:downstream_gene_variant:-:-:-:-:-
chr01	4576313	G	A	L2-1-1-1-1-1-2-4-2-1	ES-CN15	1	Macma4_01_g06470:downstream_gene_variant:-:-:-:-:-
chr01	4576667	CAAG	C	L1-2-1-2-1	PHL10	1	Macma4_01_g06470:downstream_gene_variant:-:-:-:-:-
chr01	4577390	G	A	L1-1	KOR06	1	Macma4_01_g06470:downstream_gene_variant:-:-:-:-:-, Macma4_01_g06480:downstream_gene_variant:-:-:-:-:-
chr01	4582588	G	T	L1-2-2-2-1	VNM04	1	Macma4_01_g06480:stop_gained:329:329:110:S/*:tCa/tAa
chr01	4586266	G	A	L2-1-1-1-1-2-2	COL03,GLP02	2	Macma4_01_g06480:upstream_gene_variant:-:-:-:-:-
chr01	4593918	T	C	L2-1-2-1-1-1-1-1-1-2-1	PAN01	1	Macma4_01_g06490:synonymous_variant:1257:1257:419:L:ctT/ctC
chr01	4595025	A	G	L1-2-2-2-2-1	VNM06	1	Macma4_01_g06490:downstream_gene_variant:-:-:-:-:-, Macma4_01_g06500:upstream_gene_variant:-:-:-:-:-
chr01	4597430	T	C	L1-2-2-2-2-2-2-1-1	VNM01	1	Macma4_01_g06490:downstream_gene_variant:-:-:-:-:-, Macma4_01_g06500:upstream_gene_variant:-:-:-:-:-
chr01	4599943	C	A	L2-2-1-1-2	CRI06	1	Macma4_01_g06500:splice_polypyrimidine_tract_variant,intron_variant:-:-:-:-:-
chr01	4600057	A	C	L2-1-1-1-1-3-2-2-1-1-1	ECU01	1	Macma4_01_g06500:intron_variant:-:-:-:-:-
chr01	4617298	C	T	L2-1-2-1-2	GTM01	1	Macma4_01_g06500:synonymous_variant:3966:3927:1309:A:gcC/gcT
chr01	4617527	C	T	L2-1-1-1-1-3-2-2-2-2-3-2-2-1	ECU08	1	Macma4_01_g06500:missense_variant:4195:4156:1386:L/F:Ctc/Ttc
chr01	4636126	G	A	L2-1-2-1-1-1-1-1-1-1-1-2-2-1	ES-CN19,GLP03	2	Macma4_01_g06510:missense_variant:1123:1123:375:A/T:Gct/Act, Macma4_01_g06520:downstream_gene_variant:-:-:-:-:-
chr01	4650233	C	A	L1-2-2-2-2	CHN01,CHN02,CHN03,CHN04,CHN05,VNM10,TH-KOR01,TH-KOR02,TH-KOR03,TH-KOR04,TH-KOR05,TH-KOR06,TH-KOR07,TH-KOR08,VNM01,VNM03,VNM02,VNM05,VNM06,VNM07	20	Macma4_01_g06530:upstream_gene_variant:-:-:-:-:-
chr01	4661819	G	A	L2-1-1-1-1-3-2-2-2-2-3-2-1-1	DOM03	1	Macma4_01_g06540:missense_variant:767:767:256:S/F:tCc/tTc, Macma4_01_g06550:upstream_gene_variant:-:-:-:-:-
chr01	4663192	T	C	L2-1-2-1-1-1-1-1-1-1-1-2-1-1-1-1	ECU09	1	Macma4_01_g06540:upstream_gene_variant:-:-:-:-:-, Macma4_01_g06550:upstream_gene_variant:-:-:-:-:-
chr01	4665357	G	T	L2-2-1-1-1-1-2	ECU04	1	Macma4_01_g06540:upstream_gene_variant:-:-:-:-:-, Macma4_01_g06550:missense_variant:121:74:25:S/I:aGt/aTt, Macma4_01_g06560:upstream_gene_variant:-:-:-:-:-
chr01	4673746	C	G	L2-1-1-1-2	ES-CN17,ES-CN18,CRI07,ECU05	4	Macma4_01_g06550:downstream_gene_variant:-:-:-:-:-, Macma4_01_g06560:downstream_gene_variant:-:-:-:-:-, Macma4_01_g06580:splice_acceptor_variant:-:-:-:-:-
chr01	4674026	G	A	L2-1-2-1-1-1-1-1-1-1-1-1-1-1-1-1-2	COL07	1	Macma4_01_g06560:downstream_gene_variant:-:-:-:-:-, Macma4_01_g06580:intron_variant:-:-:-:-:-
chr01	4682319	C	T	L2-1-2-1-1-1-1-1-1-1-1-1-1-1-1-2-2-2	CRI05	1	Macma4_01_g06580:upstream_gene_variant:-:-:-:-:-
chr01	4682321	C	A	L2-1-1-1-1-3-2-2-2-2-2-2-3-2-2	AUS07	1	Macma4_01_g06580:upstream_gene_variant:-:-:-:-:-
chr01	4688923	G	A	L2-1-1-1-1-3-2-1-1	DOM01	1	Macma4_01_g06590:missense_variant:1408:1408:470:E/K:Gag/Aag, Macma4_01_g06600:downstream_gene_variant:-:-:-:-:-
chr01	4689064	G	A	L1-2-2-2-2-2-3-2-2-2-2-1	TH-KOR07	1	Macma4_01_g06590:intron_variant:-:-:-:-:-, Macma4_01_g06600:downstream_gene_variant:-:-:-:-:-
chr01	4698763	TTTTTAC	T	L1-2-2-2-2-1	VNM06	1	Macma4_01_g06600:upstream_gene_variant:-:-:-:-:-, Macma4_01_g06610:downstream_gene_variant:-:-:-:-:-, Macma4_01_g06620:downstream_gene_variant:-:-:-:-:-
chr01	4701953	G	A	L1-2-2-2-2-2-3-2-2-2-1	TH-KOR06,TH-KOR08	2	Macma4_01_g06600:upstream_gene_variant:-:-:-:-:-, Macma4_01_g06610:upstream_gene_variant:-:-:-:-:-, Macma4_01_g06620:downstream_gene_variant:-:-:-:-:-
chr01	4703034	T	A	L1-2-2-2-2-2-2-2-2-2	VNM07	1	Macma4_01_g06610:upstream_gene_variant:-:-:-:-:-, Macma4_01_g06620:intron_variant:-:-:-:-:-
chr01	4703119	C	A	L2-1-2-1-1-1-1-1-1-1-1-1-1-1-1-3	ECU02,ECU03	2	Macma4_01_g06610:upstream_gene_variant:-:-:-:-:-, Macma4_01_g06620:intron_variant:-:-:-:-:-
chr01	4707049	G	T	L1-2-2-2-2-2-3-2-1-1	VNM05	1	Macma4_01_g06620:intron_variant:-:-:-:-:-, Macma4_01_g06630:downstream_gene_variant:-:-:-:-:-
chr01	4707115	C	T	L1-2-2-2-2-2-2-2-2-1	CHN05	1	Macma4_01_g06620:intron_variant:-:-:-:-:-, Macma4_01_g06630:downstream_gene_variant:-:-:-:-:-
chr01	4711405	C	T	L2-1-1-1-1-3-2-1	DOM01,DOM02	2	Macma4_01_g06620:upstream_gene_variant:-:-:-:-:-, Macma4_01_g06630:upstream_gene_variant:-:-:-:-:-, Macma4_01_g06640:downstream_gene_variant:-:-:-:-:-
chr01	4715296	G	A	L2-2-2-2-2	GTM02	1	Macma4_01_g06640:intron_variant:-:-:-:-:-
chr01	4717507	C	T	L1-2-1-2-2-2-1	PHL05	1	Macma4_01_g06640:upstream_gene_variant:-:-:-:-:-, Macma4_01_g06650:upstream_gene_variant:-:-:-:-:-, Macma4_01_g06660:upstream_gene_variant:-:-:-:-:-
chr01	4721493	G	A	L2-1-1-1-1-3-2-2-2-2-1	AUS02	1	Macma4_01_g06640:upstream_gene_variant:-:-:-:-:-, Macma4_01_g06650:synonymous_variant:294:132:44:Q:caG/caA, Macma4_01_g06660:upstream_gene_variant:-:-:-:-:-
chr01	4721885	G	A	L2-1-2-1-1-1-1-1-1-1-1-2-1	ECU06,ECU07,ECU09,GHA04,HND02	5	Macma4_01_g06650:downstream_gene_variant:-:-:-:-:-, Macma4_01_g06660:synonymous_variant:126:117:39:K:aaG/aaA
chr01	4736829	T	C	L2-1-2-1-1-1-1-1-1-1-1-2-1-3	HND02	1	Macma4_01_g06670:downstream_gene_variant:-:-:-:-:-, Macma4_01_g06680:intron_variant:-:-:-:-:-
chr01	4737499	T	A	L2-1-1-1-2-2	CRI07,ECU05	2	Macma4_01_g06670:downstream_gene_variant:-:-:-:-:-, Macma4_01_g06680:synonymous_variant:486:321:107:A:gcT/gcA
chr01	4742704	G	A	L2-1-1-1-1-1-2-2	ES-CN13,ES-CN14	2	Macma4_01_g06680:downstream_gene_variant:-:-:-:-:-, Macma4_01_g06690:upstream_gene_variant:-:-:-:-:-
chr01	4744722	C	A	L2-1-2-2	ECU10,PER01,PER02,PER04,PER05,PER06	6	Macma4_01_g06680:downstream_gene_variant:-:-:-:-:-, Macma4_01_g06690:upstream_gene_variant:-:-:-:-:-
chr01	4747765	C	T	L1-2-2-2-2-2-1	CHN01	1	Macma4_01_g06690:intron_variant:-:-:-:-:-, Macma4_01_g06700:upstream_gene_variant:-:-:-:-:-
chr01	4761697	G	T	L1-2-2-2-2-2-3-2-2-2-1	TH-KOR06,TH-KOR08	2	Macma4_01_g06570:downstream_gene_variant:-:-:-:-:-, Macma4_01_g06710:downstream_gene_variant:-:-:-:-:-, Macma4_01_g06720:missense_variant:912:863:288:P/Q:cCa/cAa
chr01	4769874	T	A	L2-1-2-1-1-1-3	GHA01,GHA02	2	Macma4_01_g06570:synonymous_variant:27:27:9:I:atA/atT, Macma4_01_g06730:upstream_gene_variant:-:-:-:-:-
chr01	4773002	T	G	L2-1-2-1-1-1-1-1-1-1-1-2-2-1-1	GLP03	1	Macma4_01_g06570:upstream_gene_variant:-:-:-:-:-, Macma4_01_g06730:intron_variant:-:-:-:-:-
chr01	4773481	C	T	L2-1-1-1-1-2-2-2	GLP02	1	Macma4_01_g06570:upstream_gene_variant:-:-:-:-:-, Macma4_01_g06730:intron_variant:-:-:-:-:-
chr01	4775793	G	T	L2-1-2-1-1-1-3	GHA01,GHA02	2	Macma4_01_g06730:intron_variant:-:-:-:-:-, Macma4_01_g06740:upstream_gene_variant:-:-:-:-:-
chr01	4776245	G	T	L2-1-2-1-1-1-1-1-1-1-1-1-1-1-1	ES-CN25,ES-CN26,ES-CN31,ES-CN32,COL07,CRI03,CRI04,CRI05,CRI09,CRI10,ECU02,ECU03	12	Macma4_01_g06730:intron_variant:-:-:-:-:-, Macma4_01_g06740:upstream_gene_variant:-:-:-:-:-
chr01	4776271	CCT	C	L2-1-2-1-1-1-1-1-1-1-1-2-2-2	COL04	1	Macma4_01_g06730:intron_variant:-:-:-:-:-, Macma4_01_g06740:upstream_gene_variant:-:-:-:-:-
chr01	4795541	C	T	L2	AUS01,AUS02,AUS03,AUS04,AUS05,AUS06,AUS07,AUS08,AUS09,AUS10,CMR01,CMR02,ES-CN01,ES-CN02,ES-CN03,ES-CN04,ES-CN05,ES-CN06,ES-CN07,ES-CN08,ES-CN09,ES-CN10,ES-CN11,ES-CN12,ES-CN13,ES-CN14,ES-CN15,ES-CN16,ES-CN17,ES-CN18,ES-CN19,ES-CN20,ES-CN21,ES-CN22,ES-CN23,ES-CN24,ES-CN25,ES-CN26,ES-CN27,ES-CN28,ES-CN29,ES-CN30,ES-CN31,ES-CN32,COL01,COL02,COL03,COL04,COL05,COL06,COL07,CRI01,CRI02,CRI03,CRI04,CRI05…	115
chr01	4822228	T	C	L2-1-2-1-1-1-1-1-1-1-1-1-1-1-1-2-1	ES-CN25,ES-CN26	2	Macma4_01_g06770:upstream_gene_variant:-:-:-:-:-, Macma4_01_g06780:upstream_gene_variant:-:-:-:-:-
chr01	4830134	G	A	L2-1-2-1-1-1-1-1-1-1-1-1-1-1-1-3	ECU02,ECU03	2	Macma4_01_g06780:missense_variant:1278:1252:418:D/N:Gat/Aat, Macma4_01_g06790:downstream_gene_variant:-:-:-:-:-
chr01	4835170	A	T	L1-2-2-2-2-2-2-2-2-2	VNM07	1	Macma4_01_g06780:downstream_gene_variant:-:-:-:-:-, Macma4_01_g06790:synonymous_variant:1929:1929:643:S:tcT/tcA, Macma4_01_g06800:upstream_gene_variant:-:-:-:-:-
chr01	4837562	A	G	L2-1-2-3	DOM04	1	Macma4_01_g06790:upstream_gene_variant:-:-:-:-:-, Macma4_01_g06800:upstream_gene_variant:-:-:-:-:-
chr01	4840624	A	G	L2-1-2-1-1-1-1-1-1-2-1	PAN01	1	Macma4_01_g06790:upstream_gene_variant:-:-:-:-:-, Macma4_01_g06800:intron_variant:-:-:-:-:-
chr01	4843907	G	A	L2-1-2-1-1-1-2-1-1	ES-CN29	1	Macma4_01_g06800:missense_variant:541:541:181:G/R:Ggg/Agg, Macma4_01_g06810:upstream_gene_variant:-:-:-:-:-
chr01	4844489	C	CGCCGCAGCCGCAGCCGCA	L2-1-1-1-1-3-2-2-2-2-3-2-2-2-2-2	GHA03	1	Macma4_01_g06800:inframe_insertion:1123-1124:1123-1124:375:R/RRSRSRS:cgc/cGCCGCAGCCGCAGCCGCAgc, Macma4_01_g06810:upstream_gene_variant:-:-:-:-:-
chr01	4849262	C	A	L2-1-2-1-1-1-1-1-1-1-1-1-1	ES-CN25,ES-CN26,ES-CN31,ES-CN32,COL07,CRI03,CRI04,CRI05,CRI09,CRI10,ECU02,ECU03,GLP01,NIC02	14	Macma4_01_g06800:downstream_gene_variant:-:-:-:-:-, Macma4_01_g06810:missense_variant:453:355:119:H/N:Cat/Aat, Macma4_01_g06820:downstream_gene_variant:-:-:-:-:-
chr01	4851455	T	G	L1	CHN01,CHN02,CHN03,CHN04,CHN05,VNM10,TH-KOR01,TH-KOR02,TH-KOR03,TH-KOR04,TH-KOR05,TH-KOR06,TH-KOR07,TH-KOR08,PHL02,KOR01,KOR06,PHL01,PHL05,PHL06,PHL10,VNM01,VNM03,VNM02,VNM04,VNM05,VNM06,VNM07,VNM09	29	Macma4_01_g06810:downstream_gene_variant:-:-:-:-:-, Macma4_01_g06820:downstream_gene_variant:-:-:-:-:-
chr01	4852445	C	A	L2-1-2-1-1-1-1-1-1-2-2	PHL09	1	Macma4_01_g06810:downstream_gene_variant:-:-:-:-:-, Macma4_01_g06820:downstream_gene_variant:-:-:-:-:-
chr01	4867230	G	A	L2-1-2-1-1-1-1-1-1-1-1-2-1-2	GHA04	1	Macma4_01_g06830:missense_variant:1074:923:308:R/H:cGt/cAt, Macma4_01_g06840:downstream_gene_variant:-:-:-:-:-
chr01	4869607	C	T	L2-1-1-1-1-1-2-5-2-3	ES-CN05,ES-CN07,ES-CN08	3	Macma4_01_g06830:3_prime_UTR_variant:3187:-:-:-:-, Macma4_01_g06840:downstream_gene_variant:-:-:-:-:-
chr01	4872214	A	C	L1-2-2-2-2-1	VNM06	1	Macma4_01_g06830:downstream_gene_variant:-:-:-:-:-, Macma4_01_g06840:intron_variant:-:-:-:-:-
chr01	4873344	C	CT	L2-2-2-1-1	UKN02	1	Macma4_01_g06830:downstream_gene_variant:-:-:-:-:-, Macma4_01_g06840:intron_variant:-:-:-:-:-
chr01	4874106	T	A	L2-1-2-1-1-1-1-1-1-1-1-2-2-2	COL04	1	Macma4_01_g06830:downstream_gene_variant:-:-:-:-:-, Macma4_01_g06840:intron_variant:-:-:-:-:-
chr01	4874472	T	C	L1-2-2-2-2-2-3-1	CHN03,CHN04	2	Macma4_01_g06830:downstream_gene_variant:-:-:-:-:-, Macma4_01_g06840:intron_variant:-:-:-:-:-
chr01	4880193	T	C	L1-2-2-2-1	VNM04	1	Macma4_01_g06840:intron_variant:-:-:-:-:-
chr01	4883645	T	C	L1-2-1-2-2-1	VNM09	1	Macma4_01_g06840:upstream_gene_variant:-:-:-:-:-, Macma4_01_g06850:downstream_gene_variant:-:-:-:-:-
chr01	4887620	G	T	L2-1-2-1-1-1-1-1-1-1-1-1-2	KOR03,KOR04	2	Macma4_01_g06850:intron_variant:-:-:-:-:-
chr01	4888541	G	T	L1-2-2-2-2-2-3-2-2-1-1	TH-KOR01	1	Macma4_01_g06850:missense_variant:397:397:133:Q/K:Cag/Aag
chr01	4891687	A	G	L2-2-2-1-1	UKN02	1	Macma4_01_g06850:upstream_gene_variant:-:-:-:-:-, Macma4_01_g06860:downstream_gene_variant:-:-:-:-:-
chr01	4892276	G	T	L2-1-2-1-2	GTM01	1	Macma4_01_g06850:upstream_gene_variant:-:-:-:-:-, Macma4_01_g06860:downstream_gene_variant:-:-:-:-:-
chr01	4901505	G	A	L2-1-1-1-1-3-2-2-1-2-1	NIC01	1	Macma4_01_g06860:upstream_gene_variant:-:-:-:-:-, Macma4_01_g06870:upstream_gene_variant:-:-:-:-:-
chr01	4902459	G	T	L2-1-1-1-1-1-2-5-2-3-2-1	ES-CN05	1	Macma4_01_g06860:upstream_gene_variant:-:-:-:-:-, Macma4_01_g06870:missense_variant:476:476:159:S/I:aGc/aTc
chr01	4907885	C	T	L2-1-1-1-1-3-2-2-1-1-2-2	AUS03	1	Macma4_01_g06870:3_prime_UTR_variant:4103:-:-:-:-
chr01	4929724	A	G	L2-1-1-1-2-2-1	CRI07	1	Macma4_01_g06910:5_prime_UTR_variant:37:-:-:-:-
chr01	4930173	G	A	L2-1-1-1-1-3-2-2-2-2-2-2-1	AUS08	1	Macma4_01_g06910:intron_variant:-:-:-:-:-
chr01	4930848	G	A	L2-2-1-2	COL02	1	Macma4_01_g06910:intron_variant:-:-:-:-:-, Macma4_01_g06920:downstream_gene_variant:-:-:-:-:-
chr01	4933858	C	T	L1-2-2-2-2-2-3-2-1-2	CHN02	1	Macma4_01_g06910:synonymous_variant:1284:924:308:F:ttC/ttT, Macma4_01_g06920:downstream_gene_variant:-:-:-:-:-, Macma4_01_g06930:upstream_gene_variant:-:-:-:-:-
chr01	4968083	G	A	L2-1-2-1-1-1-1-1-1-1-1-1-2	KOR03,KOR04	2	Macma4_01_g06970:downstream_gene_variant:-:-:-:-:-, Macma4_01_g06980:intron_variant:-:-:-:-:-
chr01	4969319	T	C	L2-1-2-1-1-1-1-1-1-1-1-1-1-1-1-1-1-1	CRI09,CRI10	2	Macma4_01_g06980:intron_variant:-:-:-:-:-
chr01	4972452	A	G	L2-2-2-2-1	MEX01	1	Macma4_01_g06980:intron_variant:-:-:-:-:-
chr01	4983071	A	G	L1-2-2-2-2-2-2-2-2-1	CHN05	1	Macma4_01_g06980:intron_variant:-:-:-:-:-
chr01	4987258	A	T	L1-2-2-2-2-2-3-1	CHN03,CHN04	2	Macma4_01_g06980:upstream_gene_variant:-:-:-:-:-, Macma4_01_g06990:upstream_gene_variant:-:-:-:-:-, Macma4_01_g07000:upstream_gene_variant:-:-:-:-:-
chr01	4989808	G	T	L1-2-1-2-1	PHL10	1	Macma4_01_g06980:upstream_gene_variant:-:-:-:-:-, Macma4_01_g06990:downstream_gene_variant:-:-:-:-:-, Macma4_01_g07000:upstream_gene_variant:-:-:-:-:-, Macma4_01_g07010:upstream_gene_variant:-:-:-:-:-
chr01	4997535	G	T	L1-2-1-2-2-2-2-2	PHL02	1	Macma4_01_g07000:downstream_gene_variant:-:-:-:-:-, Macma4_01_g07010:downstream_gene_variant:-:-:-:-:-, Macma4_01_g07020:intron_variant:-:-:-:-:-, Macma4_01_g07030:upstream_gene_variant:-:-:-:-:-
chr01	5003121	GC	G	L2-1-1-1-1-3-2-2-2-2-3-2-1-1	DOM03	1	Macma4_01_g07020:upstream_gene_variant:-:-:-:-:-, Macma4_01_g07030:frameshift_variant:1010:1010:337:A/X:gCt/gt, Macma4_01_g07040:downstream_gene_variant:-:-:-:-:-
chr01	5004801	T	G	L2-1-2-1-2	GTM01	1	Macma4_01_g07020:upstream_gene_variant:-:-:-:-:-, Macma4_01_g07030:synonymous_variant:2055:2055:685:P:ccT/ccG, Macma4_01_g07040:downstream_gene_variant:-:-:-:-:-
chr01	5011932	G	T	L1-2-2-2-2-2-2-2-2-1	CHN05	1	Macma4_01_g07040:intron_variant:-:-:-:-:-
chr01	5032035	G	A	L1-2-1-2-2-2-2-1	PHL06	1	Macma4_01_g07040:upstream_gene_variant:-:-:-:-:-
chr01	5042311	G	A	L2-2-2	GTM02,MEX01,UKN01,UKN02	4
chr01	5043882	G	C	L2-1-2-1-1-1-1-1-1-1-1-1-1-2	GLP01	1
chr01	5050443	T	C	L1-2-1-2-2-1	VNM09	1	Macma4_01_g07050:missense_variant:371:371:124:M/T:aTg/aCg, Macma4_01_g07060:upstream_gene_variant:-:-:-:-:-
chr01	5050887	T	A	L2-1-1-1-2-1	ES-CN17,ES-CN18	2	Macma4_01_g07050:intron_variant:-:-:-:-:-, Macma4_01_g07060:upstream_gene_variant:-:-:-:-:-
chr01	5051435	A	G	L2-1-1-1-1-3-2-2-1-1-2-1	PHL07	1	Macma4_01_g07050:missense_variant:481:481:161:I/V:Ata/Gta, Macma4_01_g07060:upstream_gene_variant:-:-:-:-:-
chr01	5054914	A	G	L2-1-2-1-1-1-1-1-1-1-1-1-1-1-1-2-1	ES-CN25,ES-CN26	2	Macma4_01_g07050:downstream_gene_variant:-:-:-:-:-, Macma4_01_g07060:synonymous_variant:954:942:314:R:cgA/cgG
chr01	5056470	G	A	L2-1-1-1-1-1-2-5-2-3	ES-CN05,ES-CN07,ES-CN08	3	Macma4_01_g07050:downstream_gene_variant:-:-:-:-:-, Macma4_01_g07060:downstream_gene_variant:-:-:-:-:-, Macma4_01_g07070:upstream_gene_variant:-:-:-:-:-
chr01	5070605	A	T	L1-2-2-2-2-2-2-2-2-1	CHN05	1	Macma4_01_g07070:downstream_gene_variant:-:-:-:-:-, Macma4_01_g07080:upstream_gene_variant:-:-:-:-:-, Macma4_01_g07090:downstream_gene_variant:-:-:-:-:-
chr01	5075548	C	A	L1-2-1-2-1	PHL10	1	Macma4_01_g07090:intron_variant:-:-:-:-:-
chr01	5085365	C	A	L1-2-2-2-2-2-2-2-1	VNM10	1	Macma4_01_g07090:upstream_gene_variant:-:-:-:-:-, Macma4_01_g07100:upstream_gene_variant:-:-:-:-:-
chr01	5089738	T	A	L1-2-2-2-2-2-3-1-1	CHN03	1	Macma4_01_g07100:intron_variant:-:-:-:-:-
chr01	5097012	G	A	L2-1-2-1-1-1-1-1-1-1-1-2-1-3	HND02	1	Macma4_01_g07100:downstream_gene_variant:-:-:-:-:-, Macma4_01_g07110:synonymous_variant:753:657:219:T:acG/acA, Macma4_01_g07120:downstream_gene_variant:-:-:-:-:-, Macma4_01_g07130:upstream_gene_variant:-:-:-:-:-
chr01	5101114	C	T	L2-1-2-1-1-1-1-1-1-1-1-2-1	ECU06,ECU07,ECU09,GHA04,HND02	5	Macma4_01_g07110:downstream_gene_variant:-:-:-:-:-, Macma4_01_g07120:upstream_gene_variant:-:-:-:-:-, Macma4_01_g07130:synonymous_variant:276:276:92:T:acC/acT, Macma4_01_g07140:upstream_gene_variant:-:-:-:-:-
chr01	5102383	G	A	L2-1-2-1-1-1-1-1-1-1-1-1-1-1-1-2-2-2	CRI05	1	Macma4_01_g07110:downstream_gene_variant:-:-:-:-:-, Macma4_01_g07120:upstream_gene_variant:-:-:-:-:-, Macma4_01_g07130:intron_variant:-:-:-:-:-, Macma4_01_g07140:intron_variant:-:-:-:-:-
chr01	5111766	A	G	L1-2-1-2-1	PHL10	1	Macma4_01_g07150:downstream_gene_variant:-:-:-:-:-, Macma4_01_g07160:upstream_gene_variant:-:-:-:-:-
chr01	5122706	C	T	L2-1-2-1-1-1-1-1-1-1-1-2-1-1-1-2	ECU07	1	Macma4_01_g07160:stop_gained:1913:1585:529:R/*:Cga/Tga
chr01	5126246	G	A	L2-1-2-1-1-1-1-1-1-1-1-1-1	ES-CN25,ES-CN26,ES-CN31,ES-CN32,COL07,CRI03,CRI04,CRI05,CRI09,CRI10,ECU02,ECU03,GLP01,NIC02	14	Macma4_01_g07160:intron_variant:-:-:-:-:-
chr01	5130880	T	G	L2-1-2-1-1-1-1-1-1-1-1-2-2-2	COL04	1	Macma4_01_g07160:downstream_gene_variant:-:-:-:-:-, Macma4_01_g07170:downstream_gene_variant:-:-:-:-:-
chr01	5132574	G	T	L1-2-2-2-1	VNM04	1	Macma4_01_g07160:downstream_gene_variant:-:-:-:-:-, Macma4_01_g07170:missense_variant:801:608:203:A/E:gCa/gAa
chr01	5133371	C	T	L1-2-2-2-2-2-3-2-1-1	VNM05	1	Macma4_01_g07160:downstream_gene_variant:-:-:-:-:-, Macma4_01_g07170:intron_variant:-:-:-:-:-, Macma4_01_g07180:downstream_gene_variant:-:-:-:-:-
chr01	5140219	C	T	L2-1-2-1-1-1-1-1-1-1-1-1-1-1-1-2-1-2	ES-CN25	1	Macma4_01_g07170:upstream_gene_variant:-:-:-:-:-, Macma4_01_g07180:missense_variant:2032:1351:451:G/R:Gga/Aga
chr01	5141583	C	A	L2-1-2-1-1-1-1-1-1-1-1-2-1-1	ECU06,ECU07,ECU09	3	Macma4_01_g07170:upstream_gene_variant:-:-:-:-:-, Macma4_01_g07180:intron_variant:-:-:-:-:-
chr01	5144767	C	T	L2-1-1-1-1-3-2-2-1-2-2	ES-CN21,ES-CN22	2	Macma4_01_g07180:intron_variant:-:-:-:-:-
chr01	5153498	T	A	L1-2-1-2-1	PHL10	1	Macma4_01_g07180:upstream_gene_variant:-:-:-:-:-, Macma4_01_g07190:downstream_gene_variant:-:-:-:-:-
chr01	5153603	C	A	L2-1-2-1-1-1-1-1-1-1-1-1-1-1-1-3	ECU02,ECU03	2	Macma4_01_g07180:upstream_gene_variant:-:-:-:-:-, Macma4_01_g07190:downstream_gene_variant:-:-:-:-:-
chr01	5155218	T	C	L1-2-2-2-2-1	VNM06	1	Macma4_01_g07180:upstream_gene_variant:-:-:-:-:-, Macma4_01_g07190:missense_variant:1317:574:192:K/E:Aag/Gag, Macma4_01_g07200:downstream_gene_variant:-:-:-:-:-
chr01	5164051	G	T	L2-1-2-1-1-1-1-1-1-1-1-1-1-1-1-1-1-2-1	CRI04	1	Macma4_01_g07200:intron_variant:-:-:-:-:-
chr01	5170418	G	A	L1-2-2-2-2-2-3-2-2-1	TH-KOR01,TH-KOR02,TH-KOR04	3	Macma4_01_g07200:intron_variant:-:-:-:-:-
chr01	5179062	GA	G	L2-1-2-1-1-1-1-1-1-1-1-1-1-1-1-3	ECU02,ECU03	2	Macma4_01_g07210:intron_variant:-:-:-:-:-
chr01	5201698	A	G	L1-2-2-2-2-2-3-2-2-1	TH-KOR01,TH-KOR02,TH-KOR04	3	Macma4_01_g07230:upstream_gene_variant:-:-:-:-:-
chr01	5202948	G	A	L2-1-2-2-2	PER01	1	Macma4_01_g07230:upstream_gene_variant:-:-:-:-:-
chr01	5203003	C	A	L1-2-2-2-2-2-3-2-2-2-2-1	TH-KOR07	1	Macma4_01_g07230:upstream_gene_variant:-:-:-:-:-
chr01	5205198	C	A	L2-1-1-1-1-3-2-2-2-2-3-2-1-1	DOM03	1	Macma4_01_g07230:upstream_gene_variant:-:-:-:-:-
chr01	5227215	A	G	L1-2-1-2-1	PHL10	1	Macma4_01_g07250:upstream_gene_variant:-:-:-:-:-, Macma4_01_g07260:downstream_gene_variant:-:-:-:-:-
chr01	5228800	C	T	L1-2-2-2-2-2-3-2-2-2-2-2	TH-KOR03,TH-KOR05	2	Macma4_01_g07250:upstream_gene_variant:-:-:-:-:-, Macma4_01_g07260:downstream_gene_variant:-:-:-:-:-
chr01	5228982	C	T	L2-1-1-1-1-3-2-2-2-2-3-1	COL05	1	Macma4_01_g07250:upstream_gene_variant:-:-:-:-:-, Macma4_01_g07260:downstream_gene_variant:-:-:-:-:-, Macma4_01_g07270:upstream_gene_variant:-:-:-:-:-
chr01	5247515	ATTTGGACTTATT	A	L2-1-1-1-1-3-2-2-2-2-3-1	COL05	1	Macma4_01_g07280:downstream_gene_variant:-:-:-:-:-, Macma4_01_g07290:intron_variant:-:-:-:-:-
chr01	5248160	C	T	L2-2-1-1-1-1-2	ECU04	1	Macma4_01_g07280:downstream_gene_variant:-:-:-:-:-, Macma4_01_g07290:intron_variant:-:-:-:-:-
chr01	5269087	A	T	L1-2-2-2-2-2-3-2-2	TH-KOR01,TH-KOR02,TH-KOR03,TH-KOR04,TH-KOR05,TH-KOR06,TH-KOR07,TH-KOR08	8	Macma4_01_g07310:3_prime_UTR_variant:1764:-:-:-:-, Macma4_01_g07320:downstream_gene_variant:-:-:-:-:-
chr01	5271828	C	A	L1-2-2-2-2-2-3-2-2-2-1-2	TH-KOR08	1	Macma4_01_g07310:downstream_gene_variant:-:-:-:-:-, Macma4_01_g07320:stop_gained:2317:2143:715:E/*:Gag/Tag, Macma4_01_g07340:downstream_gene_variant:-:-:-:-:-
chr01	5273032	C	T	L2-1-1-1-1-2-2-1	COL03	1	Macma4_01_g07310:downstream_gene_variant:-:-:-:-:-, Macma4_01_g07320:intron_variant:-:-:-:-:-, Macma4_01_g07330:downstream_gene_variant:-:-:-:-:-, Macma4_01_g07340:downstream_gene_variant:-:-:-:-:-
chr01	5274058	C	T	L1-2-2-2-2-2-2-1-2	VNM03,VNM02	2	Macma4_01_g07310:downstream_gene_variant:-:-:-:-:-, Macma4_01_g07320:synonymous_variant:1401:1227:409:E:gaG/gaA, Macma4_01_g07330:downstream_gene_variant:-:-:-:-:-, Macma4_01_g07340:downstream_gene_variant:-:-:-:-:-
chr01	5278677	G	A	L1-2-2-2-2-2-3-2-2	TH-KOR01,TH-KOR02,TH-KOR03,TH-KOR04,TH-KOR05,TH-KOR06,TH-KOR07,TH-KOR08	8	Macma4_01_g07320:upstream_gene_variant:-:-:-:-:-, Macma4_01_g07330:intron_variant:-:-:-:-:-, Macma4_01_g07340:upstream_gene_variant:-:-:-:-:-, Macma4_01_g07350:downstream_gene_variant:-:-:-:-:-
chr01	5280336	G	T	L1-2-2-2-2-2-1	CHN01	1	Macma4_01_g07320:upstream_gene_variant:-:-:-:-:-, Macma4_01_g07330:upstream_gene_variant:-:-:-:-:-, Macma4_01_g07340:upstream_gene_variant:-:-:-:-:-, Macma4_01_g07350:stop_gained:1625:1604:535:S/*:tCa/tAa
chr01	5288689	C	T	L2-1-2-1-1-1-1-1-1-1-1-2-1-1-1-2	ECU07	1	Macma4_01_g07350:upstream_gene_variant:-:-:-:-:-
chr01	5290513	C	T	L2-1-1-1-1-3-2-2-2-2-3-2-1-2	KOR02,KOR05	2	Macma4_01_g07350:upstream_gene_variant:-:-:-:-:-
chr01	5291733	C	A	L2-1-2-1-1-1-1-1-2-2	CRI02	1	Macma4_01_g07350:upstream_gene_variant:-:-:-:-:-, Macma4_01_g07360:downstream_gene_variant:-:-:-:-:-
chr01	5299408	C	G	L2-1-2-1-1-1-1-1-1-1-1-2-1-2	GHA04	1	Macma4_01_g07360:missense_variant:343:206:69:R/P:cGc/cCc, Macma4_01_g07370:upstream_gene_variant:-:-:-:-:-, Macma4_01_g07380:downstream_gene_variant:-:-:-:-:-
chr01	5301368	T	G	L1-2-2-2-2	CHN01,CHN02,CHN03,CHN04,CHN05,VNM10,TH-KOR01,TH-KOR02,TH-KOR03,TH-KOR04,TH-KOR05,TH-KOR06,TH-KOR07,TH-KOR08,VNM01,VNM03,VNM02,VNM05,VNM06,VNM07	20	Macma4_01_g07360:upstream_gene_variant:-:-:-:-:-, Macma4_01_g07370:intron_variant:-:-:-:-:-, Macma4_01_g07380:downstream_gene_variant:-:-:-:-:-
chr01	5301879	C	T	L2-1-1-1-1-2-2-1	COL03	1	Macma4_01_g07360:upstream_gene_variant:-:-:-:-:-, Macma4_01_g07370:downstream_gene_variant:-:-:-:-:-, Macma4_01_g07380:downstream_gene_variant:-:-:-:-:-
chr01	5305904	C	A	L2-1-2-1-1-1-1-1-1-1-1-1-1-1-1-1-1-1-1	CRI10	1	Macma4_01_g07370:downstream_gene_variant:-:-:-:-:-, Macma4_01_g07380:missense_variant:483:483:161:E/D:gaG/gaT, Macma4_01_g07390:upstream_gene_variant:-:-:-:-:-, Macma4_01_g07400:upstream_gene_variant:-:-:-:-:-
chr01	5307575	A	G	L2-1-1-1-1-1-2-5-2-2	ES-CN23,ES-CN24	2	Macma4_01_g07380:upstream_gene_variant:-:-:-:-:-, Macma4_01_g07390:downstream_gene_variant:-:-:-:-:-, Macma4_01_g07400:upstream_gene_variant:-:-:-:-:-, Macma4_01_g07410:downstream_gene_variant:-:-:-:-:-
chr01	5311718	A	T	L1-2-1-2-2-2-2-2	PHL02	1	Macma4_01_g07390:downstream_gene_variant:-:-:-:-:-, Macma4_01_g07400:downstream_gene_variant:-:-:-:-:-, Macma4_01_g07410:3_prime_UTR_variant:1034:-:-:-:-
chr01	5324953	G	A	L1-2-2-2-2-2-3-2-2-1	TH-KOR01,TH-KOR02,TH-KOR04	3	Macma4_01_g07430:downstream_gene_variant:-:-:-:-:-, Macma4_01_g07440:downstream_gene_variant:-:-:-:-:-
chr01	5324962	T	A	L1-2-2-2-2-2-3-2-2-1	TH-KOR01,TH-KOR02,TH-KOR04	3	Macma4_01_g07430:downstream_gene_variant:-:-:-:-:-, Macma4_01_g07440:downstream_gene_variant:-:-:-:-:-
chr01	5326360	G	C	L2-1-2-1-1-1-1-1-1-1-1-2-2-2	COL04	1	Macma4_01_g07430:downstream_gene_variant:-:-:-:-:-, Macma4_01_g07440:downstream_gene_variant:-:-:-:-:-
chr01	5333834	A	T	L2-1-1-1-1-1-2-3-2-2	ES-CN10	1	Macma4_01_g07440:upstream_gene_variant:-:-:-:-:-, Macma4_01_g07450:missense_variant:397:259:87:M/L:Atg/Ttg
chr01	5336260	C	T	L2-1-2-2-1-1-3	PER06	1	Macma4_01_g07440:upstream_gene_variant:-:-:-:-:-, Macma4_01_g07450:synonymous_variant:1176:1038:346:A:gcC/gcT
chr01	5351794	T	C	L1-2-2-2-2-2-3-2-2	TH-KOR01,TH-KOR02,TH-KOR03,TH-KOR04,TH-KOR05,TH-KOR06,TH-KOR07,TH-KOR08	8	Macma4_01_g07460:intron_variant:-:-:-:-:-, Macma4_01_g07470:downstream_gene_variant:-:-:-:-:-
chr01	5366094	A	T	L2-1-2-2	ECU10,PER01,PER02,PER04,PER05,PER06	6	Macma4_01_g07470:upstream_gene_variant:-:-:-:-:-, Macma4_01_g07480:intron_variant:-:-:-:-:-
chr01	5369201	G	T	L2-1-2-1-1-1-1-1-1-1-1-1-1-1-1-1-1-1-1	CRI10	1	Macma4_01_g07470:upstream_gene_variant:-:-:-:-:-, Macma4_01_g07480:stop_lost:491:302:101:*/L:tGa/tTa, Macma4_01_g07490:downstream_gene_variant:-:-:-:-:-
chr01	5373894	C	A	L2-1-1-1-1-2-2-1	COL03	1	Macma4_01_g07480:downstream_gene_variant:-:-:-:-:-, Macma4_01_g07490:missense_variant:1381:1381:461:A/S:Gca/Tca
chr01	5376170	A	T	L2-1-2-1-1-1-1-1-1-1-1-1-1-1-1-2-1-2	ES-CN25	1	Macma4_01_g07490:intron_variant:-:-:-:-:-
chr01	5384409	C	A	L1-2-1-2-1	PHL10	1	Macma4_01_g07490:upstream_gene_variant:-:-:-:-:-, Macma4_01_g07500:intron_variant:-:-:-:-:-, Macma4_01_g07510:downstream_gene_variant:-:-:-:-:-
chr01	5385091	G	A	L2-1-2-1-1-1-1-1-1-2-1	PAN01	1	Macma4_01_g07490:upstream_gene_variant:-:-:-:-:-, Macma4_01_g07500:5_prime_UTR_variant:145:-:-:-:-, Macma4_01_g07510:downstream_gene_variant:-:-:-:-:-
chr01	5394962	A	G	L1-2-2-2-2-2-3-2-2-2-2-2	TH-KOR03,TH-KOR05	2	Macma4_01_g07510:upstream_gene_variant:-:-:-:-:-, Macma4_01_g07520:upstream_gene_variant:-:-:-:-:-
chr01	5396347	A	C	L2-1-1-1-1-3-2-2-2-2-2-2-1	AUS08	1	Macma4_01_g07510:upstream_gene_variant:-:-:-:-:-, Macma4_01_g07520:upstream_gene_variant:-:-:-:-:-, Macma4_01_g07530:downstream_gene_variant:-:-:-:-:-
chr01	5399208	G	T	L1-2-2-2-2-2-2-2-1	VNM10	1	Macma4_01_g07520:downstream_gene_variant:-:-:-:-:-, Macma4_01_g07530:downstream_gene_variant:-:-:-:-:-
chr01	5402366	A	C	L2-1-1-1-1-2-2-1	COL03	1	Macma4_01_g07530:upstream_gene_variant:-:-:-:-:-, Macma4_01_g07540:downstream_gene_variant:-:-:-:-:-
chr01	5406698	G	T	L2-1-2-1-1-1-1-1-1-1-1-2-1-3	HND02	1	Macma4_01_g07540:synonymous_variant:504:504:168:I:atC/atA
chr01	5407984	G	C	L1-2-1-2-2-2-2-1	PHL06	1	Macma4_01_g07540:upstream_gene_variant:-:-:-:-:-, Macma4_01_g07550:downstream_gene_variant:-:-:-:-:-
chr01	5413648	G	A	L1-2-2-2-2-2-3-2-1-2	CHN02	1	Macma4_01_g07550:stop_gained:383:253:85:Q/*:Cag/Tag, Macma4_01_g07560:upstream_gene_variant:-:-:-:-:-
chr01	5418893	C	T	L2-1-2-1-1-1-1-1-1-1-1-1-1-1-1-1-1-2	CRI03,CRI04	2	Macma4_01_g07550:upstream_gene_variant:-:-:-:-:-, Macma4_01_g07560:intron_variant:-:-:-:-:-
chr01	5421966	G	A	L1-2-2-2-2-2-3-2-2-2-2-1	TH-KOR07	1	Macma4_01_g07560:intron_variant:-:-:-:-:-
chr01	5421984	C	G	L1-2-2-2-2-2-3-2-1-1	VNM05	1	Macma4_01_g07560:intron_variant:-:-:-:-:-
chr01	5422580	T	G	L2-1-1-1-1-3-2-2-2-2-2-2-3-2-2	AUS07	1	Macma4_01_g07560:intron_variant:-:-:-:-:-
chr01	5422714	C	A	L2-1-2-1-1-1-1-1-1-1-1-1-1-1-1-1-1-1-2	CRI09	1	Macma4_01_g07560:intron_variant:-:-:-:-:-
chr01	5424671	C	G	L2-1-2-1-1-1-1-1-1-2-2	PHL09	1	Macma4_01_g07560:intron_variant:-:-:-:-:-
chr01	5424972	G	A	L2-1-2-1-1-1-1-1-1-1-1-2-2-2	COL04	1	Macma4_01_g07560:intron_variant:-:-:-:-:-
chr01	5428466	T	C	L2-1-2-1-1-1-1-1-1-1-1-1-1-1-1-2-1-2	ES-CN25	1	Macma4_01_g07560:downstream_gene_variant:-:-:-:-:-, Macma4_01_g07570:downstream_gene_variant:-:-:-:-:-
chr01	5433142	C	T	L2-1-1-1-1-3-2-2-1-1-2-1	PHL07	1	Macma4_01_g07570:intron_variant:-:-:-:-:-
chr01	5435480	TTG	T	L2-1-1-1-1-1-2-5-2-1	ES-CN06	1	Macma4_01_g07570:intron_variant:-:-:-:-:-
chr01	5436507	G	A	L1-2-2-2-2-2-3-2-1	CHN02,VNM05	2	Macma4_01_g07570:intron_variant:-:-:-:-:-
chr01	5438039	C	T	L1-2-2-2-2-2-2-2-2-2	VNM07	1	Macma4_01_g07570:intron_variant:-:-:-:-:-
chr01	5439999	C	T	L1-2-1-2-2-1	VNM09	1	Macma4_01_g07570:intron_variant:-:-:-:-:-
chr01	5448960	A	G	L2-1-2-1-1-2-1	ES-CN28	1	Macma4_01_g07570:upstream_gene_variant:-:-:-:-:-, Macma4_01_g07580:downstream_gene_variant:-:-:-:-:-
chr01	5449882	C	A	L2-1-2-1-1-1-1-1-1-1-2-1-1	PHL04	1	Macma4_01_g07570:upstream_gene_variant:-:-:-:-:-, Macma4_01_g07580:stop_gained:2906:2722:908:E/*:Gag/Tag
chr01	5461823	A	T	L2-1-2-1-1-1-1-1-1-2-2	PHL09	1	Macma4_01_g07590:intron_variant:-:-:-:-:-
chr01	5470301	T	G	L1-2-2-2-2-2-1	CHN01	1	Macma4_01_g07590:intron_variant:-:-:-:-:-
chr01	5474566	G	A	L2-1-2-1-1-1-1-1-1-1-1-2-1	ECU06,ECU07,ECU09,GHA04,HND02	5	Macma4_01_g07590:downstream_gene_variant:-:-:-:-:-, Macma4_01_g07600:upstream_gene_variant:-:-:-:-:-
chr01	5476166	C	T	L2-1-1-1-1-3-2-2-2-2-3-2-2-1	ECU08	1	Macma4_01_g07590:downstream_gene_variant:-:-:-:-:-, Macma4_01_g07600:missense_variant:434:127:43:H/Y:Cat/Tat
chr01	5482645	A	G	L2-1-1-1-1-1-2-4-2-1	ES-CN15	1	Macma4_01_g07600:intron_variant:-:-:-:-:-
chr01	5484420	C	T	L2-1-2-1-1-1-1-1-1-1-1-1-2-2	KOR03	1	Macma4_01_g07600:intron_variant:-:-:-:-:-, Macma4_01_g07610:downstream_gene_variant:-:-:-:-:-
chr01	5486368	T	A	L2-1-1-1-2-1-1	ES-CN18	1	Macma4_01_g07600:intron_variant:-:-:-:-:-, Macma4_01_g07610:downstream_gene_variant:-:-:-:-:-
chr01	5486373	T	A	L2-1-1-1-2-1-1	ES-CN18	1	Macma4_01_g07600:intron_variant:-:-:-:-:-, Macma4_01_g07610:downstream_gene_variant:-:-:-:-:-
chr01	5488231	CT	C	L2-1-2-1-1-1-1-1-2-2	CRI02	1	Macma4_01_g07600:intron_variant:-:-:-:-:-, Macma4_01_g07610:downstream_gene_variant:-:-:-:-:-, Macma4_01_g07620:upstream_gene_variant:-:-:-:-:-
chr01	5492250	C	T	L2-1-1-1-1-1-2-3-2-1	ES-CN09	1	Macma4_01_g07600:downstream_gene_variant:-:-:-:-:-, Macma4_01_g07610:upstream_gene_variant:-:-:-:-:-, Macma4_01_g07620:upstream_gene_variant:-:-:-:-:-
chr01	5494239	TTGACGAATGATAGCTG	T	L2-1-1-1-1-3-2-2-2-2-3-2-1-2	KOR02,KOR05	2	Macma4_01_g07610:upstream_gene_variant:-:-:-:-:-, Macma4_01_g07620:intron_variant:-:-:-:-:-, Macma4_01_g07630:upstream_gene_variant:-:-:-:-:-
chr01	5495244	G	A	L2-1-1-1-1-1-2-5-2-2	ES-CN23,ES-CN24	2	Macma4_01_g07610:upstream_gene_variant:-:-:-:-:-, Macma4_01_g07620:intron_variant:-:-:-:-:-, Macma4_01_g07630:upstream_gene_variant:-:-:-:-:-
chr01	5497519	T	G	L1-2-2-2-2-2-2-1	VNM01,VNM03,VNM02	3	Macma4_01_g07620:downstream_gene_variant:-:-:-:-:-, Macma4_01_g07630:upstream_gene_variant:-:-:-:-:-
chr01	5499182	A	C	L2-1-2-1-1-1-1-1-1-1-1-1-2	KOR03,KOR04	2	Macma4_01_g07620:downstream_gene_variant:-:-:-:-:-, Macma4_01_g07630:synonymous_variant:263:132:44:V:gtA/gtC
chr01	5502323	T	G	L2-1-2-1-1-1-1-1-1-1-1-2-2-2	COL04	1	Macma4_01_g07630:intron_variant:-:-:-:-:-
chr01	5509681	G	A	L2-1-1-1-1-3-2-2-2-2-3-2-2-2-2-1	CMR01	1	Macma4_01_g07640:upstream_gene_variant:-:-:-:-:-
chr01	5516700	A	C	L2-1-2-1-1-1-1-1-1-1-1-1-1-1-1-1-1-2-2	CRI03	1	Macma4_01_g07640:downstream_gene_variant:-:-:-:-:-, Macma4_01_g07650:upstream_gene_variant:-:-:-:-:-
chr01	5518167	T	C	L2-1-2-1-1-1-1-1-1-1-1-1-1-1-1-1-2	COL07	1	Macma4_01_g07640:downstream_gene_variant:-:-:-:-:-, Macma4_01_g07650:upstream_gene_variant:-:-:-:-:-
chr01	5521396	C	A	L2-1-2-1-1-1-1-1-1-2-1	PAN01	1	Macma4_01_g07640:downstream_gene_variant:-:-:-:-:-, Macma4_01_g07650:intron_variant:-:-:-:-:-
chr01	5526388	C	A	L2-1-2-1-1-1-1-1-1-1-1-2-2-1-2	ES-CN19	1	Macma4_01_g07650:intron_variant:-:-:-:-:-, Macma4_01_g07660:downstream_gene_variant:-:-:-:-:-
chr01	5531883	G	A	L2-2-1-1-2	CRI06	1	Macma4_01_g07650:downstream_gene_variant:-:-:-:-:-, Macma4_01_g07660:upstream_gene_variant:-:-:-:-:-, Macma4_01_g07670:upstream_gene_variant:-:-:-:-:-
chr01	5536227	C	T	L2-1-1-1-1-2-1	ES-CN20	1	Macma4_01_g07660:upstream_gene_variant:-:-:-:-:-, Macma4_01_g07670:upstream_gene_variant:-:-:-:-:-, Macma4_01_g07680:downstream_gene_variant:-:-:-:-:-
chr01	5550443	ATT	A	L2-1-2-1-1-1-1-1-1-1-1-2-1-3	HND02	1	Macma4_01_g07690:downstream_gene_variant:-:-:-:-:-, Macma4_01_g07700:upstream_gene_variant:-:-:-:-:-
chr01	5551769	T	G	L1-2-1-2-1	PHL10	1	Macma4_01_g07700:upstream_gene_variant:-:-:-:-:-
chr01	5554916	C	G	L2-1-1-1-1-3-2-1	DOM01,DOM02	2	Macma4_01_g07700:intron_variant:-:-:-:-:-
chr01	5556280	G	T	L1-2-2-2-2-2-3-1-2	CHN04	1	Macma4_01_g07700:intron_variant:-:-:-:-:-, Macma4_01_g07710:upstream_gene_variant:-:-:-:-:-, Macma4_01_g07720:upstream_gene_variant:-:-:-:-:-
chr01	5560365	AG	A	L2-1-1-1-1-3-2-2-2-2-3-2-2-2-2-2	GHA03	1	Macma4_01_g07700:downstream_gene_variant:-:-:-:-:-, Macma4_01_g07710:frameshift_variant:32:32:11:R/X:aGg/ag, Macma4_01_g07720:upstream_gene_variant:-:-:-:-:-
chr01	5561059	A	G	L2-1-2-1-1-1-1-1-1-1-1-1-1-1-1-3	ECU02,ECU03	2	Macma4_01_g07700:downstream_gene_variant:-:-:-:-:-, Macma4_01_g07710:downstream_gene_variant:-:-:-:-:-, Macma4_01_g07720:intron_variant:-:-:-:-:-
chr01	5564437	A	T	L1-2-2-2-2-2-3-2-1-2	CHN02	1	Macma4_01_g07700:downstream_gene_variant:-:-:-:-:-, Macma4_01_g07710:downstream_gene_variant:-:-:-:-:-, Macma4_01_g07720:intron_variant:-:-:-:-:-
chr01	5567589	A	C	L1-1	KOR06	1	Macma4_01_g07720:intron_variant:-:-:-:-:-
chr01	5570645	C	T	L2-1-1-2	VNM08	1	Macma4_01_g07720:downstream_gene_variant:-:-:-:-:-, Macma4_01_g07730:upstream_gene_variant:-:-:-:-:-
chr01	5585068	C	T	L2-1-2-1-1-1-1-1-1-1-1-1-2-2	KOR03	1	Macma4_01_g07740:synonymous_variant:5051:4929:1643:L:ctG/ctA
chr01	5585582	G	A	L2-1-1-1-1-3-2-2-2-2-3-2-1	DOM03,KOR02,KOR05	3	Macma4_01_g07740:missense_variant:4537:4415:1472:A/V:gCa/gTa
chr01	5586072	C	T	L2-1-2-1-1-1-1-2	MEX02	1	Macma4_01_g07740:intron_variant:-:-:-:-:-
chr01	5589618	A	C	L2-1-2-1-1-1-1-1-1-1-1-2-1-1-1-1	ECU09	1	Macma4_01_g07740:intron_variant:-:-:-:-:-
chr01	5589844	C	T	L2-1-2-1-1-1-1-1-1-2-1	PAN01	1	Macma4_01_g07740:splice_donor_variant:-:-:-:-:-
chr01	5607233	C	T	L1-2-2-2-2-2-3-2-1	CHN02,VNM05	2	Macma4_01_g07760:downstream_gene_variant:-:-:-:-:-, Macma4_01_g07770:synonymous_variant:252:168:56:T:acC/acT
chr01	5607272	C	T	L1-1	KOR06	1	Macma4_01_g07760:downstream_gene_variant:-:-:-:-:-, Macma4_01_g07770:synonymous_variant:291:207:69:A:gcC/gcT
chr01	5621448	G	A	L2-1-1-1-1-3-2-2-1-2-1	NIC01	1	Macma4_01_g07780:downstream_gene_variant:-:-:-:-:-, Macma4_01_g07790:upstream_gene_variant:-:-:-:-:-, Macma4_01_g07800:downstream_gene_variant:-:-:-:-:-
chr01	5622815	C	T	L2-2-2-2-1	MEX01	1	Macma4_01_g07780:downstream_gene_variant:-:-:-:-:-, Macma4_01_g07790:upstream_gene_variant:-:-:-:-:-, Macma4_01_g07800:downstream_gene_variant:-:-:-:-:-, Macma4_01_g07810:downstream_gene_variant:-:-:-:-:-
chr01	5623505	C	T	L1-2-1-2-1	PHL10	1	Macma4_01_g07780:downstream_gene_variant:-:-:-:-:-, Macma4_01_g07790:upstream_gene_variant:-:-:-:-:-, Macma4_01_g07800:downstream_gene_variant:-:-:-:-:-, Macma4_01_g07810:downstream_gene_variant:-:-:-:-:-
chr01	5624061	C	T	L2-1-1-1-1-3-2-2-2-2-2-1-1	AUS01	1	Macma4_01_g07780:downstream_gene_variant:-:-:-:-:-, Macma4_01_g07790:upstream_gene_variant:-:-:-:-:-, Macma4_01_g07800:downstream_gene_variant:-:-:-:-:-, Macma4_01_g07810:downstream_gene_variant:-:-:-:-:-
chr01	5624446	C	A	L2-1-2-1-1-1-1-1-1-1-1-1-1-1-1-1-2	COL07	1	Macma4_01_g07790:upstream_gene_variant:-:-:-:-:-, Macma4_01_g07800:downstream_gene_variant:-:-:-:-:-, Macma4_01_g07810:downstream_gene_variant:-:-:-:-:-
chr01	5624788	G	A	L2	AUS01,AUS02,AUS03,AUS04,AUS05,AUS06,AUS07,AUS08,AUS09,AUS10,CMR01,CMR02,ES-CN01,ES-CN02,ES-CN03,ES-CN04,ES-CN05,ES-CN06,ES-CN07,ES-CN08,ES-CN09,ES-CN10,ES-CN11,ES-CN12,ES-CN13,ES-CN14,ES-CN15,ES-CN16,ES-CN17,ES-CN18,ES-CN19,ES-CN20,ES-CN21,ES-CN22,ES-CN23,ES-CN24,ES-CN25,ES-CN26,ES-CN27,ES-CN28,ES-CN29,ES-CN30,ES-CN31,ES-CN32,COL01,COL02,COL03,COL04,COL05,COL06,COL07,CRI01,CRI02,CRI03,CRI04,CRI05…	115	Macma4_01_g07790:upstream_gene_variant:-:-:-:-:-, Macma4_01_g07800:downstream_gene_variant:-:-:-:-:-, Macma4_01_g07810:downstream_gene_variant:-:-:-:-:-
chr01	5625499	G	A	L2-1-1-1-1-3-2-2-2-2-3-2-1-1	DOM03	1	Macma4_01_g07790:upstream_gene_variant:-:-:-:-:-, Macma4_01_g07800:downstream_gene_variant:-:-:-:-:-, Macma4_01_g07810:downstream_gene_variant:-:-:-:-:-
chr01	5639962	T	C	L2-1-2-1-2	GTM01	1	Macma4_01_g07810:upstream_gene_variant:-:-:-:-:-, Macma4_01_g07820:upstream_gene_variant:-:-:-:-:-
chr01	5643526	C	T	L2-1-2-1-1-1-1-1-1-1-1-2-2-1-2	ES-CN19	1	Macma4_01_g07810:upstream_gene_variant:-:-:-:-:-, Macma4_01_g07820:downstream_gene_variant:-:-:-:-:-, Macma4_01_g07830:downstream_gene_variant:-:-:-:-:-
chr01	5652377	T	TAA	L1-2-2-2-2-2-2-1-2-1	VNM03	1	Macma4_01_g07830:upstream_gene_variant:-:-:-:-:-, Macma4_01_g07840:upstream_gene_variant:-:-:-:-:-, Macma4_01_g07850:downstream_gene_variant:-:-:-:-:-
chr01	5662901	C	A	L2-1-1-1-1-3-2-2-1-2-2	ES-CN21,ES-CN22	2	Macma4_01_g07850:upstream_gene_variant:-:-:-:-:-, Macma4_01_g07860:intron_variant:-:-:-:-:-, Macma4_01_g07870:upstream_gene_variant:-:-:-:-:-
chr01	5672226	C	T	L2-1-2-1	ES-CN19,ES-CN25,ES-CN26,ES-CN27,ES-CN28,ES-CN29,ES-CN30,ES-CN31,ES-CN32,COL04,COL07,CRI01,CRI02,CRI03,CRI04,CRI05,CRI08,CRI09,CRI10,ECU02,ECU03,ECU06,ECU07,ECU09,GHA01,GHA02,GHA04,GTM01,GTM03,GLP01,GLP03,HND01,HND02,KOR03,KOR04,MEX02,NIC02,PAN01,PHL03,PHL04,PHL09	41	Macma4_01_g07870:downstream_gene_variant:-:-:-:-:-
chr01	5676535	G	A	L2-1-2-2-1-2-1	ECU10	1	Macma4_01_g07880:downstream_gene_variant:-:-:-:-:-
chr01	5677782	G	C	L1-2-2-2-2-2-3-2-2-2-1	TH-KOR06,TH-KOR08	2	Macma4_01_g07880:downstream_gene_variant:-:-:-:-:-
chr01	5681028	TG	T	L2-1-2-1-1-1-1-1-1-2-1	PAN01	1	Macma4_01_g07880:intron_variant:-:-:-:-:-, Macma4_01_g07890:downstream_gene_variant:-:-:-:-:-
chr01	5688091	CAA	C	L1-1	KOR06	1	Macma4_01_g07880:upstream_gene_variant:-:-:-:-:-, Macma4_01_g07890:intron_variant:-:-:-:-:-
chr01	5688917	C	A	L2-2-1-1-1-1-1	COL06	1	Macma4_01_g07890:intron_variant:-:-:-:-:-
chr01	5696811	G	T	L2-2-2-2-1	MEX01	1	Macma4_01_g07890:intron_variant:-:-:-:-:-
chr01	5703930	C	T	L2-1-2-1-1-1-2-1-2	GTM03	1	Macma4_01_g07900:missense_variant:920:920:307:T/I:aCc/aTc
chr01	5706475	G	A	L2-1-2-1-2	GTM01	1	Macma4_01_g07900:downstream_gene_variant:-:-:-:-:-
chr01	5709025	C	T	L2-1-1-1-1-1-2-1	ES-CN16	1	Macma4_01_g07900:downstream_gene_variant:-:-:-:-:-
chr01	5709944	A	C	L2-1-2-1-1-1-1-1-1-1-1-1-1-1-1-1-1-1-2	CRI09	1	Macma4_01_g07900:downstream_gene_variant:-:-:-:-:-
chr01	5712267	C	A	L2-1-1-1-1-3-2-2-2-2-3-2-1-1	DOM03	1	Macma4_01_g07910:upstream_gene_variant:-:-:-:-:-
chr01	5712268	G	T	L2-1-1-1-1-3-2-2-2-2-3-2-1-1	DOM03	1	Macma4_01_g07910:upstream_gene_variant:-:-:-:-:-
chr01	5723816	G	A	L1-2-2-2-2-2-2-2-2-2	VNM07	1
chr01	5735356	G	A	L2-1-2-1-1-1-1-1-1-1-1-1-2	KOR03,KOR04	2	Macma4_01_g07920:downstream_gene_variant:-:-:-:-:-, Macma4_01_g07930:3_prime_UTR_variant:809:-:-:-:-
chr01	5741309	G	A	L1-2-2-2-2-2-3-2-1-1	VNM05	1	Macma4_01_g07930:upstream_gene_variant:-:-:-:-:-, Macma4_01_g07940:intron_variant:-:-:-:-:-
chr01	5743282	G	T	L2-1-2-1-1-2-2	ES-CN27	1	Macma4_01_g07930:upstream_gene_variant:-:-:-:-:-, Macma4_01_g07940:missense_variant:1090:1067:356:W/L:tGg/tTg, Macma4_01_g07950:upstream_gene_variant:-:-:-:-:-
chr01	5753417	C	A	L2-1-1-1-1-3-2-2-2-2-3-2-2	CMR01,CMR02,ECU08,GHA03	4	Macma4_01_g07950:downstream_gene_variant:-:-:-:-:-, Macma4_01_g07960:intron_variant:-:-:-:-:-
chr01	5758882	C	T	L2-1-2-1-2	GTM01	1	Macma4_01_g07960:upstream_gene_variant:-:-:-:-:-, Macma4_01_g07970:downstream_gene_variant:-:-:-:-:-
chr01	5762496	C	A	L1-2-2-2-2-2-3-2-2-2-1	TH-KOR06,TH-KOR08	2	Macma4_01_g07960:upstream_gene_variant:-:-:-:-:-, Macma4_01_g07970:downstream_gene_variant:-:-:-:-:-
chr01	5765521	T	C	L1-2-2-2-2-2-3-2-2-1	TH-KOR01,TH-KOR02,TH-KOR04	3	Macma4_01_g07970:intron_variant:-:-:-:-:-
chr01	5766744	A	T	L2-1-2-1-1-1-1-1-1-1-1-2-1-3	HND02	1	Macma4_01_g07970:intron_variant:-:-:-:-:-
chr01	5767779	C	T	L2-1-2-1-1-1-1-1-1-1-1-1-1	ES-CN25,ES-CN26,ES-CN31,ES-CN32,COL07,CRI03,CRI04,CRI05,CRI09,CRI10,ECU02,ECU03,GLP01,NIC02	14	Macma4_01_g07970:missense_variant:1756:1541:514:S/N:aGc/aAc
chr01	5777823	T	G	L2-2-2-2-2	GTM02	1	Macma4_01_g07980:upstream_gene_variant:-:-:-:-:-, Macma4_01_g07990:downstream_gene_variant:-:-:-:-:-
chr01	5778040	C	G	L2-1-2-1-1-1-1-1-1-1-1-2-2-1-2	ES-CN19	1	Macma4_01_g07980:upstream_gene_variant:-:-:-:-:-, Macma4_01_g07990:downstream_gene_variant:-:-:-:-:-, Macma4_01_g08000:upstream_gene_variant:-:-:-:-:-
chr01	5778644	GA	G	L1-2-2-2-2-2-3-2-2-1-1	TH-KOR01	1	Macma4_01_g07980:upstream_gene_variant:-:-:-:-:-, Macma4_01_g07990:frameshift_variant:669:623:208:I/X:aTc/ac, Macma4_01_g08000:upstream_gene_variant:-:-:-:-:-
chr01	5782937	A	T	L2-1-2-1-1-1-2-1-2	GTM03	1	Macma4_01_g07990:upstream_gene_variant:-:-:-:-:-, Macma4_01_g08000:upstream_gene_variant:-:-:-:-:-, Macma4_01_g08010:downstream_gene_variant:-:-:-:-:-
chr01	5786108	A	AT	L1-2-2-2-2-2-3-1-2	CHN04	1	Macma4_01_g07990:upstream_gene_variant:-:-:-:-:-, Macma4_01_g08000:downstream_gene_variant:-:-:-:-:-, Macma4_01_g08010:downstream_gene_variant:-:-:-:-:-
chr01	5786131	G	A	L2-1-2-1-1-1-1-1-1-1-3	HND01	1	Macma4_01_g07990:upstream_gene_variant:-:-:-:-:-, Macma4_01_g08000:downstream_gene_variant:-:-:-:-:-, Macma4_01_g08010:downstream_gene_variant:-:-:-:-:-
chr01	5789844	A	T	L1-2-2-2-2-2	CHN01,CHN02,CHN03,CHN04,CHN05,VNM10,TH-KOR01,TH-KOR02,TH-KOR03,TH-KOR04,TH-KOR05,TH-KOR06,TH-KOR07,TH-KOR08,VNM01,VNM03,VNM02,VNM05,VNM07	19	Macma4_01_g08000:downstream_gene_variant:-:-:-:-:-, Macma4_01_g08010:5_prime_UTR_variant:147:-:-:-:-
chr01	5798833	AGAAAG	A	L2-1-2-1-1-1-1-1-1-2-2	PHL09	1	Macma4_01_g08020:downstream_gene_variant:-:-:-:-:-, Macma4_01_g08030:3_prime_UTR_variant:3358-3362:-:-:-:-
chr01	5814989	C	T	L1-2-2-2-2-2-2-1-1	VNM01	1	Macma4_01_g08040:splice_donor_region_variant,intron_variant:-:-:-:-:-, Macma4_01_g08050:downstream_gene_variant:-:-:-:-:-
chr01	5816928	A	T	L1-1	KOR06	1	Macma4_01_g08040:upstream_gene_variant:-:-:-:-:-, Macma4_01_g08050:intron_variant:-:-:-:-:-
chr01	5822824	G	A	L1-2-1-2-2-2-2-2	PHL02	1	Macma4_01_g08050:upstream_gene_variant:-:-:-:-:-, Macma4_01_g08060:missense_variant:190:190:64:D/N:Gat/Aat, Macma4_01_g08070:upstream_gene_variant:-:-:-:-:-
chr01	5823326	G	A	L2-1-2-1-1-1-1-1-1-1-1-2-1-1-1	ECU07,ECU09	2	Macma4_01_g08050:upstream_gene_variant:-:-:-:-:-, Macma4_01_g08060:synonymous_variant:561:561:187:V:gtG/gtA, Macma4_01_g08070:upstream_gene_variant:-:-:-:-:-
chr01	5823766	C	A	L2-1-1-1-1-3-2-2-2-1	PHL08	1	Macma4_01_g08050:upstream_gene_variant:-:-:-:-:-, Macma4_01_g08060:missense_variant:1001:1001:334:A/D:gCc/gAc, Macma4_01_g08070:upstream_gene_variant:-:-:-:-:-, Macma4_01_g08080:upstream_gene_variant:-:-:-:-:-
chr01	5831158	G	A	L2-1-1-1-1-3-2-2-1-2-2	ES-CN21,ES-CN22	2	Macma4_01_g08070:downstream_gene_variant:-:-:-:-:-, Macma4_01_g08080:intron_variant:-:-:-:-:-, Macma4_01_g08090:upstream_gene_variant:-:-:-:-:-
chr01	5832026	G	A	L2-1-1-1-1-1-2-4-2-1	ES-CN15	1	Macma4_01_g08070:downstream_gene_variant:-:-:-:-:-, Macma4_01_g08080:intron_variant:-:-:-:-:-, Macma4_01_g08090:upstream_gene_variant:-:-:-:-:-
chr01	5835864	T	C	L1-2-2-2-2-2-3-2-1-1	VNM05	1	Macma4_01_g08080:downstream_gene_variant:-:-:-:-:-, Macma4_01_g08090:intron_variant:-:-:-:-:-
chr01	5839021	T	A	L2-1-1-1-1-3-2-2-2-2-3-2-2-2-2-2	GHA03	1	Macma4_01_g08090:downstream_gene_variant:-:-:-:-:-
chr01	5846979	C	A	L2-1-2-1-1-1-1-1-1-1-1-1-1-1-1-4	ES-CN32	1	Macma4_01_g08100:intron_variant:-:-:-:-:-
chr01	5854682	G	A	L2	AUS01,AUS02,AUS03,AUS04,AUS05,AUS06,AUS07,AUS08,AUS09,AUS10,CMR01,CMR02,ES-CN01,ES-CN02,ES-CN03,ES-CN04,ES-CN05,ES-CN06,ES-CN07,ES-CN08,ES-CN09,ES-CN10,ES-CN11,ES-CN12,ES-CN13,ES-CN14,ES-CN15,ES-CN16,ES-CN17,ES-CN18,ES-CN19,ES-CN20,ES-CN21,ES-CN22,ES-CN23,ES-CN24,ES-CN25,ES-CN26,ES-CN27,ES-CN28,ES-CN29,ES-CN30,ES-CN31,ES-CN32,COL01,COL02,COL03,COL04,COL05,COL06,COL07,CRI01,CRI02,CRI03,CRI04,CRI05…	115	Macma4_01_g08100:intron_variant:-:-:-:-:-
chr01	5856208	TCGA	T	L2-1-2-1-2	GTM01	1	Macma4_01_g08100:upstream_gene_variant:-:-:-:-:-
chr01	5871075	C	A	L1-2-2-2-2-1	VNM06	1	Macma4_01_g08110:upstream_gene_variant:-:-:-:-:-, Macma4_01_g08120:upstream_gene_variant:-:-:-:-:-
chr01	5875300	G	C	L1-2-2-2-2-2-2-2	CHN05,VNM10,VNM07	3	Macma4_01_g08120:missense_variant:1285:1162:388:D/H:Gat/Cat
chr01	5876177	G	A	L1-2-2-2-2-2-3-2-2-1-1	TH-KOR01	1	Macma4_01_g08120:intron_variant:-:-:-:-:-, Macma4_01_g08130:upstream_gene_variant:-:-:-:-:-
chr01	5881841	C	A	L1-2-2-2-1	VNM04	1	Macma4_01_g08120:downstream_gene_variant:-:-:-:-:-, Macma4_01_g08130:missense_variant:832:550:184:L/I:Ctc/Atc, Macma4_01_g08140:upstream_gene_variant:-:-:-:-:-, Macma4_01_g08150:upstream_gene_variant:-:-:-:-:-
chr01	5884222	C	T	L2-1-2-1-1-1-1-1-1-1-1-1-1-1-1-1-1-1	CRI09,CRI10	2	Macma4_01_g08120:downstream_gene_variant:-:-:-:-:-, Macma4_01_g08130:downstream_gene_variant:-:-:-:-:-, Macma4_01_g08140:downstream_gene_variant:-:-:-:-:-, Macma4_01_g08150:missense_variant:29:29:10:P/L:cCg/cTg
chr01	5884782	A	G	L2-1-1-1-1-1-2-4-1	ES-CN02	1	Macma4_01_g08120:downstream_gene_variant:-:-:-:-:-, Macma4_01_g08130:downstream_gene_variant:-:-:-:-:-, Macma4_01_g08140:downstream_gene_variant:-:-:-:-:-, Macma4_01_g08150:downstream_gene_variant:-:-:-:-:-, Macma4_01_g08160:upstream_gene_variant:-:-:-:-:-
chr01	5888538	G	A	L2-1-2-1-1-1-1-1-1-1-1-1-2-1	KOR04	1	Macma4_01_g08150:downstream_gene_variant:-:-:-:-:-, Macma4_01_g08160:upstream_gene_variant:-:-:-:-:-, Macma4_01_g08170:downstream_gene_variant:-:-:-:-:-
chr01	5889369	C	A	L2-1-2-1-2	GTM01	1	Macma4_01_g08150:downstream_gene_variant:-:-:-:-:-, Macma4_01_g08160:upstream_gene_variant:-:-:-:-:-, Macma4_01_g08170:downstream_gene_variant:-:-:-:-:-
chr01	5898078	C	A	L2-1-1-1-1-2-2-1	COL03	1	Macma4_01_g08170:upstream_gene_variant:-:-:-:-:-, Macma4_01_g08180:stop_gained:773:577:193:E/*:Gag/Tag, Macma4_01_g08190:downstream_gene_variant:-:-:-:-:-, Macma4_01_g08200:upstream_gene_variant:-:-:-:-:-
chr01	5899125	A	G	L2-1-2-1-1-1-1-1-1-1-1-1-1-2	GLP01	1	Macma4_01_g08180:intron_variant:-:-:-:-:-, Macma4_01_g08190:downstream_gene_variant:-:-:-:-:-, Macma4_01_g08200:upstream_gene_variant:-:-:-:-:-
chr01	5903365	G	T	L1-1	KOR06	1	Macma4_01_g08180:upstream_gene_variant:-:-:-:-:-, Macma4_01_g08190:missense_variant:80:80:27:A/E:gCa/gAa, Macma4_01_g08200:downstream_gene_variant:-:-:-:-:-, Macma4_01_g08210:downstream_gene_variant:-:-:-:-:-, Macma4_01_g08220:downstream_gene_variant:-:-:-:-:-
chr01	5909395	C	A	L2-1-1-1-1-3-2-2-2-2-3-2-2-1	ECU08	1	Macma4_01_g08210:upstream_gene_variant:-:-:-:-:-, Macma4_01_g08220:upstream_gene_variant:-:-:-:-:-, Macma4_01_g08230:intron_variant:-:-:-:-:-
chr01	5911313	C	T	L1-2-2-2-2-2-2-2-1	VNM10	1	Macma4_01_g08210:upstream_gene_variant:-:-:-:-:-, Macma4_01_g08220:upstream_gene_variant:-:-:-:-:-, Macma4_01_g08230:downstream_gene_variant:-:-:-:-:-
chr01	5916787	T	A	L1-2-2-2-2-2-1	CHN01	1	Macma4_01_g08240:downstream_gene_variant:-:-:-:-:-
chr01	5922292	TA	T	L2-1-1-1-2-1-1	ES-CN18	1	Macma4_01_g08240:upstream_gene_variant:-:-:-:-:-, Macma4_01_g08250:upstream_gene_variant:-:-:-:-:-
chr01	5923759	C	G	L2-1-1-1-1-3-2-2-2-1	PHL08	1	Macma4_01_g08240:upstream_gene_variant:-:-:-:-:-, Macma4_01_g08250:upstream_gene_variant:-:-:-:-:-
chr01	5925562	C	G	L2-1-1-1-1-3-2-2-2-2-3-2-2-1	ECU08	1	Macma4_01_g08240:upstream_gene_variant:-:-:-:-:-, Macma4_01_g08250:5_prime_UTR_variant:103:-:-:-:-
chr01	5935094	G	T	L2-1-2-1-1-1-1-1-1-1-2-1-1	PHL04	1	Macma4_01_g08260:missense_variant:831:639:213:E/D:gaG/gaT
chr01	5936761	A	G	L2-1-2-1-1-1-1-1-1-2-1	PAN01	1	Macma4_01_g08260:synonymous_variant:2376:2184:728:T:acA/acG, Macma4_01_g08270:downstream_gene_variant:-:-:-:-:-
chr01	5937225	A	G	L1-2-2-2-2-2-3-2-2	TH-KOR01,TH-KOR02,TH-KOR03,TH-KOR04,TH-KOR05,TH-KOR06,TH-KOR07,TH-KOR08	8	Macma4_01_g08260:missense_variant:2840:2648:883:D/G:gAc/gGc, Macma4_01_g08270:downstream_gene_variant:-:-:-:-:-
chr01	5939646	T	C	L2-1-1-1-1-3-2-2-1-2-1	NIC01	1	Macma4_01_g08260:downstream_gene_variant:-:-:-:-:-, Macma4_01_g08270:downstream_gene_variant:-:-:-:-:-
chr01	5950366	T	A	L1-2-1-2-2-2	PHL02,PHL05,PHL06	3	Macma4_01_g08270:upstream_gene_variant:-:-:-:-:-, Macma4_01_g08280:upstream_gene_variant:-:-:-:-:-, Macma4_01_g08290:downstream_gene_variant:-:-:-:-:-
chr01	5952443	C	A	L2	AUS01,AUS02,AUS03,AUS04,AUS05,AUS06,AUS07,AUS08,AUS09,AUS10,CMR01,CMR02,ES-CN01,ES-CN02,ES-CN03,ES-CN04,ES-CN05,ES-CN06,ES-CN07,ES-CN08,ES-CN09,ES-CN10,ES-CN11,ES-CN12,ES-CN13,ES-CN14,ES-CN15,ES-CN16,ES-CN17,ES-CN18,ES-CN19,ES-CN20,ES-CN21,ES-CN22,ES-CN23,ES-CN24,ES-CN25,ES-CN26,ES-CN27,ES-CN28,ES-CN29,ES-CN30,ES-CN31,ES-CN32,COL01,COL02,COL03,COL04,COL05,COL06,COL07,CRI01,CRI02,CRI03,CRI04,CRI05…	115	Macma4_01_g08280:upstream_gene_variant:-:-:-:-:-, Macma4_01_g08290:downstream_gene_variant:-:-:-:-:-
chr01	5961505	C	T	L1-2-2-2-2-2-3-2-2-1-2	TH-KOR02,TH-KOR04	2	Macma4_01_g08290:upstream_gene_variant:-:-:-:-:-, Macma4_01_g08300:upstream_gene_variant:-:-:-:-:-
chr01	5971433	C	A	L2-1-2-1-1-1-1-1-1-1-2-1-1	PHL04	1	Macma4_01_g08300:downstream_gene_variant:-:-:-:-:-, Macma4_01_g08310:downstream_gene_variant:-:-:-:-:-, Macma4_01_g08320:upstream_gene_variant:-:-:-:-:-
chr01	5973412	G	A	L2-1-1-1-1-3-2-1	DOM01,DOM02	2	Macma4_01_g08310:missense_variant:44:44:15:S/L:tCg/tTg, Macma4_01_g08320:upstream_gene_variant:-:-:-:-:-, Macma4_01_g08330:upstream_gene_variant:-:-:-:-:-
chr01	5977109	G	T	L2-1-2-1-1-1-1-1-1-1-1-1-1-1-1-2-2-2	CRI05	1	Macma4_01_g08310:upstream_gene_variant:-:-:-:-:-, Macma4_01_g08320:intron_variant:-:-:-:-:-, Macma4_01_g08330:upstream_gene_variant:-:-:-:-:-, Macma4_01_g08340:upstream_gene_variant:-:-:-:-:-, Macma4_01_g08350:upstream_gene_variant:-:-:-:-:-, Macma4_01_g08360:downstream_gene_variant:-:-:-:-:-
chr01	5984170	C	T	L1-2-2-2-2-2-3-2-2	TH-KOR01,TH-KOR02,TH-KOR03,TH-KOR04,TH-KOR05,TH-KOR06,TH-KOR07,TH-KOR08	8	Macma4_01_g08330:downstream_gene_variant:-:-:-:-:-, Macma4_01_g08340:downstream_gene_variant:-:-:-:-:-, Macma4_01_g08350:downstream_gene_variant:-:-:-:-:-, Macma4_01_g08360:upstream_gene_variant:-:-:-:-:-, Macma4_01_g08370:downstream_gene_variant:-:-:-:-:-
chr01	5987628	A	G	L2-1-1-1-1-1-2-5-2-1	ES-CN06	1	Macma4_01_g08360:upstream_gene_variant:-:-:-:-:-, Macma4_01_g08370:intron_variant:-:-:-:-:-
chr01	5990726	C	T	L1-2-2-2-2	CHN01,CHN02,CHN03,CHN04,CHN05,VNM10,TH-KOR01,TH-KOR02,TH-KOR03,TH-KOR04,TH-KOR05,TH-KOR06,TH-KOR07,TH-KOR08,VNM01,VNM03,VNM02,VNM05,VNM06,VNM07	20	Macma4_01_g08370:intron_variant:-:-:-:-:-, Macma4_01_g08380:upstream_gene_variant:-:-:-:-:-
chr01	5992710	A	G	L1-2-2-2-2-2	CHN01,CHN02,CHN03,CHN04,CHN05,VNM10,TH-KOR01,TH-KOR02,TH-KOR03,TH-KOR04,TH-KOR05,TH-KOR06,TH-KOR07,TH-KOR08,VNM01,VNM03,VNM02,VNM05,VNM07	19	Macma4_01_g08370:upstream_gene_variant:-:-:-:-:-, Macma4_01_g08380:upstream_gene_variant:-:-:-:-:-, Macma4_01_g08390:upstream_gene_variant:-:-:-:-:-
chr01	5997761	T	G	L2-1-2-1-1-1-1-1-1-1-1-1-1-1-1-2-1-1	ES-CN26	1	Macma4_01_g08380:downstream_gene_variant:-:-:-:-:-, Macma4_01_g08390:downstream_gene_variant:-:-:-:-:-, Macma4_01_g08400:upstream_gene_variant:-:-:-:-:-, Macma4_01_g08410:upstream_gene_variant:-:-:-:-:-
chr01	5999464	C	A	L2-1-2-1-1-1-1-1-1-1-1-2-1	ECU06,ECU07,ECU09,GHA04,HND02	5	Macma4_01_g08390:downstream_gene_variant:-:-:-:-:-, Macma4_01_g08400:missense_variant:1126:1005:335:S/R:agC/agA, Macma4_01_g08410:upstream_gene_variant:-:-:-:-:-
chr01	6000555	T	A	L2	AUS01,AUS02,AUS03,AUS04,AUS05,AUS06,AUS07,AUS08,AUS09,AUS10,CMR01,CMR02,ES-CN01,ES-CN02,ES-CN03,ES-CN04,ES-CN05,ES-CN06,ES-CN07,ES-CN08,ES-CN09,ES-CN10,ES-CN11,ES-CN12,ES-CN13,ES-CN14,ES-CN15,ES-CN16,ES-CN17,ES-CN18,ES-CN19,ES-CN20,ES-CN21,ES-CN22,ES-CN23,ES-CN24,ES-CN25,ES-CN26,ES-CN27,ES-CN28,ES-CN29,ES-CN30,ES-CN31,ES-CN32,COL01,COL02,COL03,COL04,COL05,COL06,COL07,CRI01,CRI02,CRI03,CRI04,CRI05…	115	Macma4_01_g08390:downstream_gene_variant:-:-:-:-:-, Macma4_01_g08400:downstream_gene_variant:-:-:-:-:-, Macma4_01_g08410:upstream_gene_variant:-:-:-:-:-
chr01	6001622	G	A	L2-1-2-1-1-1-1-1-1-1-1-2-1	ECU06,ECU07,ECU09,GHA04,HND02	5	Macma4_01_g08390:downstream_gene_variant:-:-:-:-:-, Macma4_01_g08400:downstream_gene_variant:-:-:-:-:-, Macma4_01_g08410:missense_variant:612:356:119:G/E:gGg/gAg, Macma4_01_g08420:downstream_gene_variant:-:-:-:-:-
chr01	6006905	C	T	L1-2-2-2-2-2-3-2-2-1	TH-KOR01,TH-KOR02,TH-KOR04	3	Macma4_01_g08410:downstream_gene_variant:-:-:-:-:-, Macma4_01_g08420:missense_variant:4469:4378:1460:A/T:Gca/Aca
chr01	6017400	G	C	L2-1-2-1-1-1-1-1-1-1-1-2-2-1-2	ES-CN19	1	Macma4_01_g08420:upstream_gene_variant:-:-:-:-:-, Macma4_01_g08430:intron_variant:-:-:-:-:-
chr01	6019288	G	T	L2-1-2-1-1-1-1-1-1-1-1-2-1-1-1-2	ECU07	1	Macma4_01_g08430:missense_variant:2132:1982:661:A/E:gCa/gAa
chr01	6022110	C	T	L2-1-2-1-1-1-1-1-1-1-1-2-1-1-2	ECU06	1	Macma4_01_g08430:intron_variant:-:-:-:-:-
chr01	6023115	TC	T	L2-1-1-1-1-2-1	ES-CN20	1	Macma4_01_g08430:intron_variant:-:-:-:-:-
chr01	6023118	T	A	L2-1-1-1-1-2-1	ES-CN20	1	Macma4_01_g08430:intron_variant:-:-:-:-:-
chr01	6027261	G	T	L2-1-1-1-1-3-2-2-2-2-2-2-3-2-1	AUS04	1	Macma4_01_g08430:intron_variant:-:-:-:-:-
chr01	6032543	C	T	L2-1-1-1-1-3-2-2-2-2-3-2-1-2	KOR02,KOR05	2	Macma4_01_g08430:upstream_gene_variant:-:-:-:-:-, Macma4_01_g08440:upstream_gene_variant:-:-:-:-:-, Macma4_01_g08450:upstream_gene_variant:-:-:-:-:-
chr01	6044956	G	A	L2-1-2-1-1-1-1-1-2	CRI02,CRI08	2	Macma4_01_g08450:downstream_gene_variant:-:-:-:-:-, Macma4_01_g08460:missense_variant:795:736:246:R/C:Cgc/Tgc, Macma4_01_g08470:upstream_gene_variant:-:-:-:-:-
chr01	6046372	G	T	L1-2-2-2-2-2-3-2-1	CHN02,VNM05	2	Macma4_01_g08460:upstream_gene_variant:-:-:-:-:-, Macma4_01_g08470:upstream_gene_variant:-:-:-:-:-
chr01	6048622	G	A	L1-2-2-2-2-2-3-2-2	TH-KOR01,TH-KOR02,TH-KOR03,TH-KOR04,TH-KOR05,TH-KOR06,TH-KOR07,TH-KOR08	8	Macma4_01_g08460:upstream_gene_variant:-:-:-:-:-, Macma4_01_g08470:intron_variant:-:-:-:-:-
chr01	6062142	AC	A	L1-2-2-2-2-2-1	CHN01	1	Macma4_01_g08470:downstream_gene_variant:-:-:-:-:-, Macma4_01_g08480:intron_variant:-:-:-:-:-, Macma4_01_g08490:upstream_gene_variant:-:-:-:-:-
chr01	6062275	A	C	L2-1-1-1-1-2-2-1	COL03	1	Macma4_01_g08470:downstream_gene_variant:-:-:-:-:-, Macma4_01_g08480:splice_acceptor_variant:-:-:-:-:-, Macma4_01_g08490:upstream_gene_variant:-:-:-:-:-
chr01	6067541	T	C	L2-1-1-1-1-3-2-2-2-2-2-2-3-2-1	AUS04	1	Macma4_01_g08490:3_prime_UTR_variant:542:-:-:-:-, Macma4_01_g08500:upstream_gene_variant:-:-:-:-:-
chr01	6073388	T	G	L1-2-1-2-1	PHL10	1	Macma4_01_g08500:splice_polypyrimidine_tract_variant,intron_variant:-:-:-:-:-
chr01	6076976	C	T	L2-1-2-1-1-1-1-1-1-1-1-2-2-1-2	ES-CN19	1	Macma4_01_g08500:intron_variant:-:-:-:-:-
chr01	6079823	G	T	L2-1-1-1-1-1-2-3	ES-CN03,ES-CN04,ES-CN09,ES-CN10	4	Macma4_01_g08500:intron_variant:-:-:-:-:-, Macma4_01_g08510:upstream_gene_variant:-:-:-:-:-
chr01	6080364	C	T	L1-2-2-2-2-2-3-2-2-2-2-2	TH-KOR03,TH-KOR05	2	Macma4_01_g08500:intron_variant:-:-:-:-:-, Macma4_01_g08510:upstream_gene_variant:-:-:-:-:-
chr01	6081693	G	C	L2-1-2-1-1-1-3	GHA01,GHA02	2	Macma4_01_g08500:intron_variant:-:-:-:-:-, Macma4_01_g08510:upstream_gene_variant:-:-:-:-:-
chr01	6084035	A	G	L1-2-2-2-2-1	VNM06	1	Macma4_01_g08500:downstream_gene_variant:-:-:-:-:-, Macma4_01_g08510:intron_variant:-:-:-:-:-, Macma4_01_g08520:downstream_gene_variant:-:-:-:-:-
chr01	6096233	G	A	L2-1-2-1-1-1-1-1-1-1-1-1-1-1-2	NIC02	1	Macma4_01_g08530:upstream_gene_variant:-:-:-:-:-, Macma4_01_g08540:downstream_gene_variant:-:-:-:-:-
chr01	6097085	T	C	L1-2-2-2-2-2-2-2-2-1	CHN05	1	Macma4_01_g08530:intron_variant:-:-:-:-:-, Macma4_01_g08540:downstream_gene_variant:-:-:-:-:-, Macma4_01_g08550:upstream_gene_variant:-:-:-:-:-
chr01	6099492	C	T	L2-1-1-1-1-3-1	AUS09	1	Macma4_01_g08530:intron_variant:-:-:-:-:-, Macma4_01_g08540:downstream_gene_variant:-:-:-:-:-, Macma4_01_g08550:upstream_gene_variant:-:-:-:-:-, Macma4_01_g08560:downstream_gene_variant:-:-:-:-:-
chr01	6101285	CAGT	C	L1-2-2-2-2-2-2-2-2-2	VNM07	1	Macma4_01_g08530:intron_variant:-:-:-:-:-, Macma4_01_g08550:upstream_gene_variant:-:-:-:-:-, Macma4_01_g08560:downstream_gene_variant:-:-:-:-:-
chr01	6102663	GGCGAGAGAGAGA	G	L2	AUS01,AUS02,AUS03,AUS04,AUS05,AUS06,AUS07,AUS08,AUS09,AUS10,CMR01,CMR02,ES-CN01,ES-CN02,ES-CN03,ES-CN04,ES-CN05,ES-CN06,ES-CN07,ES-CN08,ES-CN09,ES-CN10,ES-CN11,ES-CN12,ES-CN13,ES-CN14,ES-CN15,ES-CN16,ES-CN17,ES-CN18,ES-CN19,ES-CN20,ES-CN21,ES-CN22,ES-CN23,ES-CN24,ES-CN25,ES-CN26,ES-CN27,ES-CN28,ES-CN29,ES-CN30,ES-CN31,ES-CN32,COL01,COL02,COL03,COL04,COL05,COL06,COL07,CRI01,CRI02,CRI03,CRI04,CRI05…	115	Macma4_01_g08530:downstream_gene_variant:-:-:-:-:-, Macma4_01_g08550:splice_polypyrimidine_tract_variant,intron_variant:-:-:-:-:-, Macma4_01_g08560:downstream_gene_variant:-:-:-:-:-
chr01	6105999	C	T	L2-1-1-1-1-2-2-2	GLP02	1	Macma4_01_g08530:downstream_gene_variant:-:-:-:-:-, Macma4_01_g08550:downstream_gene_variant:-:-:-:-:-, Macma4_01_g08560:intron_variant:-:-:-:-:-, Macma4_01_g08570:downstream_gene_variant:-:-:-:-:-
chr01	6109497	T	C	L2-1-2-1-1-1-1-1-1-1-1-2-2-2	COL04	1	Macma4_01_g08560:upstream_gene_variant:-:-:-:-:-, Macma4_01_g08570:intron_variant:-:-:-:-:-
chr01	6122425	C	G	L1-2-2-2-2-2-3-1-2	CHN04	1	Macma4_01_g08570:upstream_gene_variant:-:-:-:-:-, Macma4_01_g08580:upstream_gene_variant:-:-:-:-:-, Macma4_01_g08590:missense_variant:1411:1231:411:E/Q:Gag/Cag
chr01	6123747	C	T	L2-1-2-1-1-1-1-1-1-1-2-1-1	PHL04	1	Macma4_01_g08570:upstream_gene_variant:-:-:-:-:-, Macma4_01_g08580:upstream_gene_variant:-:-:-:-:-, Macma4_01_g08590:intron_variant:-:-:-:-:-
chr01	6127112	C	T	L2-1-1-1-1-2-2-1	COL03	1	Macma4_01_g08590:intron_variant:-:-:-:-:-
chr01	6139181	T	C	L2-1-2-1-1-1-1-1-1-1-1-1-1-1-1-2-2-2	CRI05	1	Macma4_01_g08590:upstream_gene_variant:-:-:-:-:-, Macma4_01_g08600:splice_region_variant,splice_polypyrimidine_tract_variant,intron_variant:-:-:-:-:-
chr01	6151804	G	T	L2-1-2-1-1-1-3	GHA01,GHA02	2	Macma4_01_g08600:upstream_gene_variant:-:-:-:-:-, Macma4_01_g08610:intron_variant:-:-:-:-:-
chr01	6158115	C	T	L1-2-2-2-2-2-3-2-2-1	TH-KOR01,TH-KOR02,TH-KOR04	3	Macma4_01_g08610:missense_variant:465:340:114:V/I:Gtt/Att, Macma4_01_g08620:downstream_gene_variant:-:-:-:-:-
chr01	6169263	C	T	L2-1-1-1-1-1-2-5-2-3-2-1	ES-CN05	1	Macma4_01_g08620:upstream_gene_variant:-:-:-:-:-, Macma4_01_g08630:5_prime_UTR_variant:14:-:-:-:-
chr01	6171072	C	A	L2-1-1-1-1-2-2-2	GLP02	1	Macma4_01_g08620:upstream_gene_variant:-:-:-:-:-, Macma4_01_g08630:intron_variant:-:-:-:-:-
chr01	6204060	CA	C	L2-1-1-1-1-3-2-2-1-2-2-1	ES-CN21	1	Macma4_01_g08690:intron_variant:-:-:-:-:-, Macma4_01_g08700:downstream_gene_variant:-:-:-:-:-
chr01	6213576	A	G	L2-2-2-2-1	MEX01	1	Macma4_01_g08700:upstream_gene_variant:-:-:-:-:-, Macma4_01_g08710:downstream_gene_variant:-:-:-:-:-
chr01	6214169	A	G	L2-1-2-1-1-1-1-1-1-1-1-1-1-1-1-1-1-1-1	CRI10	1	Macma4_01_g08700:upstream_gene_variant:-:-:-:-:-, Macma4_01_g08710:missense_variant:839:839:280:I/T:aTc/aCc
chr01	6217067	G	A	L1-2-2-2-2-2-3-2-2-1-2	TH-KOR02,TH-KOR04	2	Macma4_01_g08710:intron_variant:-:-:-:-:-, Macma4_01_g08720:downstream_gene_variant:-:-:-:-:-
chr01	6217365	T	A	L2-1-2-1-1-1-1-1-1-1-1-1-2-2	KOR03	1	Macma4_01_g08710:intron_variant:-:-:-:-:-, Macma4_01_g08720:downstream_gene_variant:-:-:-:-:-
chr01	6221551	A	AT	L1-2-2-2-2-2-3-2-2-1	TH-KOR01,TH-KOR02,TH-KOR04	3	Macma4_01_g08710:upstream_gene_variant:-:-:-:-:-, Macma4_01_g08720:downstream_gene_variant:-:-:-:-:-, Macma4_01_g08730:downstream_gene_variant:-:-:-:-:-
chr01	6221553	T	A	L2-1-2-1-1-1-1-1-1-1-3	HND01	1	Macma4_01_g08710:upstream_gene_variant:-:-:-:-:-, Macma4_01_g08720:downstream_gene_variant:-:-:-:-:-, Macma4_01_g08730:downstream_gene_variant:-:-:-:-:-
chr01	6221989	G	A	L2-1-2-1-1-1-1-2	MEX02	1	Macma4_01_g08710:upstream_gene_variant:-:-:-:-:-, Macma4_01_g08720:downstream_gene_variant:-:-:-:-:-, Macma4_01_g08730:downstream_gene_variant:-:-:-:-:-
chr01	6223220	G	A	L2-1-2-1-1-1-1-2	MEX02	1	Macma4_01_g08710:upstream_gene_variant:-:-:-:-:-, Macma4_01_g08720:intron_variant:-:-:-:-:-, Macma4_01_g08730:intron_variant:-:-:-:-:-, Macma4_01_g08740:upstream_gene_variant:-:-:-:-:-
chr01	6229114	G	T	L1-2-2-2-2-2-2-2-2-1	CHN05	1	Macma4_01_g08730:upstream_gene_variant:-:-:-:-:-, Macma4_01_g08740:intron_variant:-:-:-:-:-
chr01	6229194	G	T	L2-1-2-1-1-1-1-1-1-1-1-1-1-1-1-3-2	ECU02	1	Macma4_01_g08730:upstream_gene_variant:-:-:-:-:-, Macma4_01_g08740:intron_variant:-:-:-:-:-
chr01	6229904	C	CT	L1-2-2-2-2-2-3-1-1	CHN03	1	Macma4_01_g08730:upstream_gene_variant:-:-:-:-:-, Macma4_01_g08740:splice_polypyrimidine_tract_variant,intron_variant:-:-:-:-:-
chr01	6229957	C	G	L2-1-2-1-1-1-1-1-1-2-2	PHL09	1	Macma4_01_g08730:upstream_gene_variant:-:-:-:-:-, Macma4_01_g08740:missense_variant:1054:847:283:H/D:Cac/Gac
chr01	6233807	A	G	L2-1-1-1-1-3-1	AUS09	1	Macma4_01_g08740:missense_variant:4370:4163:1388:H/R:cAc/cGc, Macma4_01_g08750:upstream_gene_variant:-:-:-:-:-
chr01	6236610	G	A	L2-1-2-1-1-1-1-1-1-2-2	PHL09	1	Macma4_01_g08740:intron_variant:-:-:-:-:-, Macma4_01_g08750:upstream_gene_variant:-:-:-:-:-, Macma4_01_g08760:upstream_gene_variant:-:-:-:-:-
chr01	6240073	G	A	L2-1-2-1-1-1-1-1-1-1-1-1-2	KOR03,KOR04	2	Macma4_01_g08740:downstream_gene_variant:-:-:-:-:-, Macma4_01_g08750:downstream_gene_variant:-:-:-:-:-, Macma4_01_g08760:missense_variant:545:514:172:G/R:Ggg/Agg
chr01	6242585	G	T	L1-2-2-2-2-1	VNM06	1	Macma4_01_g08750:downstream_gene_variant:-:-:-:-:-, Macma4_01_g08760:intron_variant:-:-:-:-:-
chr01	6252621	A	T	L1-2-2-2-2-2-3-2-1-1	VNM05	1	Macma4_01_g08760:downstream_gene_variant:-:-:-:-:-, Macma4_01_g08770:upstream_gene_variant:-:-:-:-:-, Macma4_01_g08780:upstream_gene_variant:-:-:-:-:-
chr01	6252934	C	T	L2-1-2-1-1-1-1-1-1-1-2-1-1	PHL04	1	Macma4_01_g08760:downstream_gene_variant:-:-:-:-:-, Macma4_01_g08770:upstream_gene_variant:-:-:-:-:-, Macma4_01_g08780:upstream_gene_variant:-:-:-:-:-
chr01	6255382	C	T	L2-1-2-1-1-1-1-1-1-1-2-1-1	PHL04	1	Macma4_01_g08780:intron_variant:-:-:-:-:-
chr01	6258087	G	A	L2-1-1-1-1-1-2-5-2-2	ES-CN23,ES-CN24	2	Macma4_01_g08780:intron_variant:-:-:-:-:-
chr01	6284067	A	T	L1-2-2-2-2-2-1	CHN01	1	Macma4_01_g08800:upstream_gene_variant:-:-:-:-:-, Macma4_01_g08810:intron_variant:-:-:-:-:-
chr01	6287708	T	C	L2-1-1-1-1-3-2-2-1-2-1	NIC01	1	Macma4_01_g08810:3_prime_UTR_variant:971:-:-:-:-
chr01	6291001	G	T	L2-1-2-1-1-1-2-1-1	ES-CN29	1	Macma4_01_g08810:downstream_gene_variant:-:-:-:-:-, Macma4_01_g08820:upstream_gene_variant:-:-:-:-:-, Macma4_01_g08830:upstream_gene_variant:-:-:-:-:-
chr01	6296135	G	A	L1-2-2-2-2-2-3-2-2-2-2-2	TH-KOR03,TH-KOR05	2	Macma4_01_g08820:downstream_gene_variant:-:-:-:-:-, Macma4_01_g08830:intron_variant:-:-:-:-:-, Macma4_01_g08840:upstream_gene_variant:-:-:-:-:-
chr01	6299880	C	A	L2-1-1-1-1-3-2-2-2-2-2-2-3-2-1	AUS04	1	Macma4_01_g08830:3_prime_UTR_variant:1940:-:-:-:-, Macma4_01_g08840:upstream_gene_variant:-:-:-:-:-, Macma4_01_g08850:upstream_gene_variant:-:-:-:-:-
chr01	6310552	TTATTATTATTATTA	T	L2-1-2-1-2	GTM01	1	Macma4_01_g08860:intron_variant:-:-:-:-:-
chr01	6315118	T	C	L2-2-1-2	COL02	1	Macma4_01_g08860:intron_variant:-:-:-:-:-
chr01	6315641	G	T	L2-1-2-1-1-1-1-1-1-1-1-1-1-1-1-2-2-2	CRI05	1	Macma4_01_g08860:intron_variant:-:-:-:-:-
chr01	6319373	A	G	L1-2-1-2-1	PHL10	1	Macma4_01_g08860:intron_variant:-:-:-:-:-
chr01	6320199	C	A	L2-2-1-1-1-3	COL01	1	Macma4_01_g08860:intron_variant:-:-:-:-:-
chr01	6331502	A	C	L2-1-1-1-1-3-2-2-2-2-3-2-2-2-2-1	CMR01	1	Macma4_01_g08860:intron_variant:-:-:-:-:-
chr01	6335344	C	A	L1-2-2-2-2-2-3-2-2	TH-KOR01,TH-KOR02,TH-KOR03,TH-KOR04,TH-KOR05,TH-KOR06,TH-KOR07,TH-KOR08	8	Macma4_01_g08860:upstream_gene_variant:-:-:-:-:-, Macma4_01_g08870:upstream_gene_variant:-:-:-:-:-
chr01	6340218	T	C	L2-1-2-1-1-1-1-1-1-1-1-2-1-1-2	ECU06	1	Macma4_01_g08870:intron_variant:-:-:-:-:-
chr01	6340669	T	A	L2-1-1-1-1-1-2-5-2-3-2-1	ES-CN05	1	Macma4_01_g08870:missense_variant:836:836:279:L/Q:cTa/cAa
chr01	6353436	A	G	L1-2-1-1	KOR01	1	Macma4_01_g08880:intron_variant:-:-:-:-:-, Macma4_01_g08890:upstream_gene_variant:-:-:-:-:-
chr01	6356547	G	T	L1-2-2-2-2-2-3-2-1-1	VNM05	1	Macma4_01_g08880:downstream_gene_variant:-:-:-:-:-, Macma4_01_g08890:upstream_gene_variant:-:-:-:-:-
chr01	6367039	C	A	L1-2-1-1	KOR01	1	Macma4_01_g08900:stop_gained:878:658:220:E/*:Gaa/Taa, Macma4_01_g08910:downstream_gene_variant:-:-:-:-:-
chr01	6376737	C	T	L1-2-2-2-2-2-3-2-1	CHN02,VNM05	2	Macma4_01_g08910:upstream_gene_variant:-:-:-:-:-, Macma4_01_g08920:upstream_gene_variant:-:-:-:-:-
chr01	6376999	A	G	L2-1-2-1-1-1-2-1-2	GTM03	1	Macma4_01_g08910:upstream_gene_variant:-:-:-:-:-, Macma4_01_g08920:upstream_gene_variant:-:-:-:-:-
chr01	6384037	C	T	L1-2-1-2-1	PHL10	1	Macma4_01_g08920:downstream_gene_variant:-:-:-:-:-, Macma4_01_g08930:downstream_gene_variant:-:-:-:-:-
chr01	6399168	T	G	L2-1-2-1-1-1-2-2	ES-CN30	1	Macma4_01_g08940:downstream_gene_variant:-:-:-:-:-, Macma4_01_g08950:downstream_gene_variant:-:-:-:-:-, Macma4_01_g08960:intron_variant:-:-:-:-:-, Macma4_01_g08970:downstream_gene_variant:-:-:-:-:-
chr01	6406117	G	A	L2-1-2-1-1-1-1-1-1-1-1-1-2	KOR03,KOR04	2	Macma4_01_g08960:downstream_gene_variant:-:-:-:-:-, Macma4_01_g08970:intron_variant:-:-:-:-:-
chr01	6413127	CT	C	L2-1-2-1-1-1-1-1-1-1-1-1-1-1-1-4	ES-CN32	1	Macma4_01_g08970:upstream_gene_variant:-:-:-:-:-, Macma4_01_g08980:frameshift_variant:1506:1440:480:Q/X:caA/ca, Macma4_01_g08990:downstream_gene_variant:-:-:-:-:-
chr01	6413751	C	A	L2-1-1-1-1-3-2-2-1-1-1	ECU01	1	Macma4_01_g08970:upstream_gene_variant:-:-:-:-:-, Macma4_01_g08980:stop_gained:883:817:273:E/*:Gaa/Taa, Macma4_01_g08990:downstream_gene_variant:-:-:-:-:-
chr01	6414816	T	G	L2-1-2-1-1-1-1-1-1-1-1-2-1-2	GHA04	1	Macma4_01_g08970:upstream_gene_variant:-:-:-:-:-, Macma4_01_g08980:intron_variant:-:-:-:-:-, Macma4_01_g08990:downstream_gene_variant:-:-:-:-:-
chr01	6425250	G	A	L1-2-2-2-2-2-3-2-2-1-1	TH-KOR01	1	Macma4_01_g08990:missense_variant:754:754:252:P/S:Ccc/Tcc, Macma4_01_g09000:upstream_gene_variant:-:-:-:-:-, Macma4_01_g09010:upstream_gene_variant:-:-:-:-:-
chr01	6425281	C	A	L1-2-2-2-2-1	VNM06	1	Macma4_01_g08990:missense_variant:723:723:241:E/D:gaG/gaT, Macma4_01_g09000:upstream_gene_variant:-:-:-:-:-, Macma4_01_g09010:upstream_gene_variant:-:-:-:-:-
chr01	6425581	A	T	L2-1-1-1-1-3-2-1	DOM01,DOM02	2	Macma4_01_g08990:synonymous_variant:423:423:141:S:tcT/tcA, Macma4_01_g09000:upstream_gene_variant:-:-:-:-:-, Macma4_01_g09010:upstream_gene_variant:-:-:-:-:-
chr01	6426663	G	C	L2-1-1-1-1-3-2-2-1-2-1	NIC01	1	Macma4_01_g08990:upstream_gene_variant:-:-:-:-:-, Macma4_01_g09000:upstream_gene_variant:-:-:-:-:-, Macma4_01_g09010:upstream_gene_variant:-:-:-:-:-
chr01	6431358	C	T	L1-2-2-2-2-2-3-2-2	TH-KOR01,TH-KOR02,TH-KOR03,TH-KOR04,TH-KOR05,TH-KOR06,TH-KOR07,TH-KOR08	8	Macma4_01_g09000:intron_variant:-:-:-:-:-, Macma4_01_g09010:downstream_gene_variant:-:-:-:-:-, Macma4_01_g09020:downstream_gene_variant:-:-:-:-:-
chr01	6434252	A	G	L1-2-2-2-2-2-3-2-2-2-2-1	TH-KOR07	1	Macma4_01_g09000:intron_variant:-:-:-:-:-, Macma4_01_g09010:downstream_gene_variant:-:-:-:-:-, Macma4_01_g09020:downstream_gene_variant:-:-:-:-:-, Macma4_01_g09030:downstream_gene_variant:-:-:-:-:-
chr01	6437041	G	A	L1-2-2-2-2-2-2-2	CHN05,VNM10,VNM07	3	Macma4_01_g09000:downstream_gene_variant:-:-:-:-:-, Macma4_01_g09020:synonymous_variant:270:270:90:S:tcC/tcT, Macma4_01_g09030:downstream_gene_variant:-:-:-:-:-
chr01	6439757	A	T	L2-1-2-1-1-1-2-1-1	ES-CN29	1	Macma4_01_g09000:downstream_gene_variant:-:-:-:-:-, Macma4_01_g09020:upstream_gene_variant:-:-:-:-:-, Macma4_01_g09030:intron_variant:-:-:-:-:-
chr01	6440926	G	T	L1-2-1-2-1	PHL10	1	Macma4_01_g09020:upstream_gene_variant:-:-:-:-:-, Macma4_01_g09030:intron_variant:-:-:-:-:-
chr01	6442837	T	A	L1-2-2-2-2-2-3-2-2-1-2	TH-KOR02,TH-KOR04	2	Macma4_01_g09030:intron_variant:-:-:-:-:-, Macma4_01_g09040:downstream_gene_variant:-:-:-:-:-
chr01	6445182	G	C	L2-1-1-1-1-3-2-2-2-2-3-2-1-1	DOM03	1	Macma4_01_g09030:synonymous_variant:81:81:27:S:tcC/tcG, Macma4_01_g09040:downstream_gene_variant:-:-:-:-:-
chr01	6450365	C	T	L2-1-1-1-1-3-2-2-2-2-3-2-2-2-1	CMR02	1	Macma4_01_g09040:intron_variant:-:-:-:-:-
chr01	6454948	G	A	L1-2-1-2-1	PHL10	1	Macma4_01_g09040:upstream_gene_variant:-:-:-:-:-, Macma4_01_g09050:upstream_gene_variant:-:-:-:-:-
chr01	6459213	G	T	L2-1-1-1-1-3-2-2-2-2-3-2-2-1	ECU08	1	Macma4_01_g09040:upstream_gene_variant:-:-:-:-:-, Macma4_01_g09050:missense_variant:528:263:88:R/I:aGa/aTa
chr01	6462129	TAAA	T	L1-2-2-2-2-2-2-1-2	VNM03,VNM02	2	Macma4_01_g09050:intron_variant:-:-:-:-:-
chr01	6468368	C	T	L2-1-2-1-1-1-1	ES-CN19,ES-CN25,ES-CN26,ES-CN31,ES-CN32,COL04,COL07,CRI01,CRI02,CRI03,CRI04,CRI05,CRI08,CRI09,CRI10,ECU02,ECU03,ECU06,ECU07,ECU09,GHA04,GLP01,GLP03,HND01,HND02,KOR03,KOR04,MEX02,NIC02,PAN01,PHL03,PHL04,PHL09	33	Macma4_01_g09050:downstream_gene_variant:-:-:-:-:-, Macma4_01_g09060:downstream_gene_variant:-:-:-:-:-, Macma4_01_g09070:downstream_gene_variant:-:-:-:-:-, Macma4_01_g09080:downstream_gene_variant:-:-:-:-:-
chr01	6468481	GTGGCCACAC	G	L1-2-2-2-2-2-2-2-1	VNM10	1	Macma4_01_g09050:downstream_gene_variant:-:-:-:-:-, Macma4_01_g09060:downstream_gene_variant:-:-:-:-:-, Macma4_01_g09070:downstream_gene_variant:-:-:-:-:-, Macma4_01_g09080:downstream_gene_variant:-:-:-:-:-
chr01	6477418	G	T	L2-1-2-1-1-1-1-1-1-1-3	HND01	1	Macma4_01_g09070:upstream_gene_variant:-:-:-:-:-, Macma4_01_g09080:upstream_gene_variant:-:-:-:-:-, Macma4_01_g09090:synonymous_variant:2232:2100:700:A:gcC/gcA
chr01	6481058	G	A	L1-1	KOR06	1	Macma4_01_g09090:synonymous_variant:1584:1452:484:I:atC/atT
chr01	6495113	G	T	L1-2-2-2-2-2-3-2-2	TH-KOR01,TH-KOR02,TH-KOR03,TH-KOR04,TH-KOR05,TH-KOR06,TH-KOR07,TH-KOR08	8	Macma4_01_g09090:5_prime_UTR_variant:131:-:-:-:-, Macma4_01_g09100:downstream_gene_variant:-:-:-:-:-
chr01	6502407	C	A	L2-1-2-1-1-1-1-1-1-1-1-1-1-1-1-2-1-2	ES-CN25	1	Macma4_01_g09100:intron_variant:-:-:-:-:-
chr01	6503857	G	A	L2-1-1-1-1-3-2-2-2-2-2-2-3-2-2	AUS07	1	Macma4_01_g09100:intron_variant:-:-:-:-:-
chr01	6508025	GA	G	L1-2-2-2-2-2-1	CHN01	1	Macma4_01_g09100:intron_variant:-:-:-:-:-, Macma4_01_g09110:downstream_gene_variant:-:-:-:-:-
chr01	6511262	CT	C	L1-2-2-2-2-2-3-2-2-1-1	TH-KOR01	1	Macma4_01_g09100:upstream_gene_variant:-:-:-:-:-, Macma4_01_g09110:frameshift_variant:686:269:90:K/X:aAg/ag, Macma4_01_g09120:upstream_gene_variant:-:-:-:-:-
chr01	6517908	C	T	L2-1-2-1-1-1-1-1-1-2-1	PAN01	1	Macma4_01_g09110:upstream_gene_variant:-:-:-:-:-, Macma4_01_g09120:intron_variant:-:-:-:-:-
chr01	6526530	G	T	L2-1-2-1-1-1-1-1-1-1-1-2-1-2	GHA04	1	Macma4_01_g09120:downstream_gene_variant:-:-:-:-:-, Macma4_01_g09130:downstream_gene_variant:-:-:-:-:-, Macma4_01_g09140:upstream_gene_variant:-:-:-:-:-, Macma4_01_g09150:intron_variant:-:-:-:-:-
chr01	6534340	T	A	L1-2-2-2-2-2-2-1-1	VNM01	1	Macma4_01_g09160:downstream_gene_variant:-:-:-:-:-, Macma4_01_g09170:upstream_gene_variant:-:-:-:-:-
chr01	6537039	G	A	L1-2-2-2-2-2-3-2-2-2	TH-KOR03,TH-KOR05,TH-KOR06,TH-KOR07,TH-KOR08	5	Macma4_01_g09160:downstream_gene_variant:-:-:-:-:-, Macma4_01_g09170:upstream_gene_variant:-:-:-:-:-
chr01	6541678	G	A	L1-2-2-2-1	VNM04	1	Macma4_01_g09170:intron_variant:-:-:-:-:-, Macma4_01_g09180:downstream_gene_variant:-:-:-:-:-, Macma4_01_g09190:downstream_gene_variant:-:-:-:-:-
chr01	6541731	G	A	L1-2-1-1	KOR01	1	Macma4_01_g09170:intron_variant:-:-:-:-:-, Macma4_01_g09180:downstream_gene_variant:-:-:-:-:-, Macma4_01_g09190:downstream_gene_variant:-:-:-:-:-
chr01	6544576	G	A	L2-1-2-1-1-1-1-1-1-1-1-1-1-2	GLP01	1	Macma4_01_g09170:missense_variant:1385:1337:446:R/Q:cGa/cAa, Macma4_01_g09180:downstream_gene_variant:-:-:-:-:-, Macma4_01_g09190:downstream_gene_variant:-:-:-:-:-, Macma4_01_g09200:downstream_gene_variant:-:-:-:-:-, Macma4_01_g09210:downstream_gene_variant:-:-:-:-:-
chr01	6547095	C	G	L2-1-1-1-1-3-2-2-1-2-1	NIC01	1	Macma4_01_g09170:downstream_gene_variant:-:-:-:-:-, Macma4_01_g09180:upstream_gene_variant:-:-:-:-:-, Macma4_01_g09190:upstream_gene_variant:-:-:-:-:-, Macma4_01_g09200:downstream_gene_variant:-:-:-:-:-, Macma4_01_g09210:downstream_gene_variant:-:-:-:-:-, Macma4_01_g09220:downstream_gene_variant:-:-:-:-:-, Macma4_01_g09230:downstream_gene_variant:-:-:-:-:-
chr01	6554017	A	G	L1-2-2-2-2-2-2-1	VNM01,VNM03,VNM02	3	Macma4_01_g09220:upstream_gene_variant:-:-:-:-:-, Macma4_01_g09230:intron_variant:-:-:-:-:-, Macma4_01_g09240:upstream_gene_variant:-:-:-:-:-
chr01	6555060	CGCA	C	L2-1-1-1-1-2-1	ES-CN20	1	Macma4_01_g09230:splice_region_variant,intron_variant:-:-:-:-:-, Macma4_01_g09240:upstream_gene_variant:-:-:-:-:-
chr01	6555099	C	A	L1-2-2-2-2-2-2-2-1	VNM10	1	Macma4_01_g09230:missense_variant:332:251:84:R/L:cGa/cTa, Macma4_01_g09240:upstream_gene_variant:-:-:-:-:-
chr01	6555605	A	G	L1-2-2-2-2-2-1	CHN01	1	Macma4_01_g09230:intron_variant:-:-:-:-:-, Macma4_01_g09240:upstream_gene_variant:-:-:-:-:-
chr01	6557602	A	G	L1-2-2-2-2-2-1	CHN01	1	Macma4_01_g09230:upstream_gene_variant:-:-:-:-:-, Macma4_01_g09240:upstream_gene_variant:-:-:-:-:-, Macma4_01_g09250:upstream_gene_variant:-:-:-:-:-
chr01	6558108	G	T	L2-1-2-1-1-1-1-1-1-1-1-2-1-2	GHA04	1	Macma4_01_g09230:upstream_gene_variant:-:-:-:-:-, Macma4_01_g09240:missense_variant:239:239:80:S/I:aGc/aTc, Macma4_01_g09250:upstream_gene_variant:-:-:-:-:-, Macma4_01_g09260:upstream_gene_variant:-:-:-:-:-
chr01	6560283	G	A	L1-2-2-2-2-2-3-2-2-2-2-1	TH-KOR07	1	Macma4_01_g09230:upstream_gene_variant:-:-:-:-:-, Macma4_01_g09240:downstream_gene_variant:-:-:-:-:-, Macma4_01_g09250:upstream_gene_variant:-:-:-:-:-, Macma4_01_g09260:upstream_gene_variant:-:-:-:-:-
chr01	6560394	T	G	L1-2-2-2-2-2-2-1-1	VNM01	1	Macma4_01_g09230:upstream_gene_variant:-:-:-:-:-, Macma4_01_g09240:downstream_gene_variant:-:-:-:-:-, Macma4_01_g09250:upstream_gene_variant:-:-:-:-:-, Macma4_01_g09260:upstream_gene_variant:-:-:-:-:-
chr01	6561133	A	G	L2-1-2-1-1-1-1-1-1-1-1-1-2	KOR03,KOR04	2	Macma4_01_g09240:downstream_gene_variant:-:-:-:-:-, Macma4_01_g09250:upstream_gene_variant:-:-:-:-:-, Macma4_01_g09260:upstream_gene_variant:-:-:-:-:-
chr01	6561328	C	A	L2-1-2-1-1-1-1-1-1-2-2	PHL09	1	Macma4_01_g09240:downstream_gene_variant:-:-:-:-:-, Macma4_01_g09250:upstream_gene_variant:-:-:-:-:-, Macma4_01_g09260:upstream_gene_variant:-:-:-:-:-
chr01	6561680	G	T	L2-1-1-1-1-3-2-2-1-2-2	ES-CN21,ES-CN22	2	Macma4_01_g09240:downstream_gene_variant:-:-:-:-:-, Macma4_01_g09250:missense_variant:327:286:96:A/S:Gcg/Tcg, Macma4_01_g09260:upstream_gene_variant:-:-:-:-:-
chr01	6562286	A	AT	L2-1-2-1-1-1-1-1-1-1-1-1-1-1-1-1-1-1	CRI09,CRI10	2	Macma4_01_g09240:downstream_gene_variant:-:-:-:-:-, Macma4_01_g09250:downstream_gene_variant:-:-:-:-:-, Macma4_01_g09260:upstream_gene_variant:-:-:-:-:-
chr01	6564076	G	C	L1-2-2-2-2-2-2-2-1	VNM10	1	Macma4_01_g09250:downstream_gene_variant:-:-:-:-:-, Macma4_01_g09260:intron_variant:-:-:-:-:-
chr01	6566160	T	A	L2-1-1-1-1-3-2-2-2-2-3-2-2	CMR01,CMR02,ECU08,GHA03	4	Macma4_01_g09250:downstream_gene_variant:-:-:-:-:-, Macma4_01_g09260:intron_variant:-:-:-:-:-
chr01	6574212	G	A	L2-1-2-1-1-1-1-1-1-1-1-1-2-2	KOR03	1	Macma4_01_g09260:intron_variant:-:-:-:-:-
chr01	6579536	T	C	L2-1-2-1-1-1-1-1-1-1-1-1-1-1-1-2-2-2	CRI05	1	Macma4_01_g09260:intron_variant:-:-:-:-:-
chr01	6580255	T	G	L2-1-2-1-1-1-1-1-1-1-1-2-1-1	ECU06,ECU07,ECU09	3	Macma4_01_g09260:intron_variant:-:-:-:-:-
chr01	6589730	A	C	L2-1-2-1-1-1-1-2	MEX02	1	Macma4_01_g09270:missense_variant:2279:2081:694:Y/S:tAc/tCc
chr01	6589927	A	T	L2-1-2-1-1-1-1-2	MEX02	1	Macma4_01_g09270:missense_variant:2476:2278:760:T/S:Aca/Tca, Macma4_01_g09280:upstream_gene_variant:-:-:-:-:-
chr01	6598892	T	A	L2-1-2-1-1-1-1-1-1-1-1-1-1-2	GLP01	1	Macma4_01_g09280:missense_variant:2228:1478:493:F/Y:tTt/tAt
chr01	6605189	T	C	L1-2-2-2-2-2-3-2-2-1-2	TH-KOR02,TH-KOR04	2	Macma4_01_g09280:3_prime_UTR_variant:4189:-:-:-:-, Macma4_01_g09290:upstream_gene_variant:-:-:-:-:-
chr01	6608742	C	T	L2-1-2-1-1-1-1-1-2-2	CRI02	1	Macma4_01_g09280:downstream_gene_variant:-:-:-:-:-, Macma4_01_g09290:synonymous_variant:264:264:88:S:agC/agT, Macma4_01_g09300:downstream_gene_variant:-:-:-:-:-
chr01	6610332	G	T	L2-2-2-1-1	UKN02	1	Macma4_01_g09280:downstream_gene_variant:-:-:-:-:-, Macma4_01_g09290:downstream_gene_variant:-:-:-:-:-, Macma4_01_g09300:downstream_gene_variant:-:-:-:-:-, Macma4_01_g09310:upstream_gene_variant:-:-:-:-:-
chr01	6617801	A	T	L2-1-2-1-1-1-1-1-1-1-1-1-1-1-1-3	ECU02,ECU03	2	Macma4_01_g09310:downstream_gene_variant:-:-:-:-:-, Macma4_01_g09320:downstream_gene_variant:-:-:-:-:-
chr01	6618853	G	T	L2-1-1-1-1-3-2-2-2-2-3-2-1-1	DOM03	1	Macma4_01_g09310:downstream_gene_variant:-:-:-:-:-, Macma4_01_g09320:downstream_gene_variant:-:-:-:-:-, Macma4_01_g09330:upstream_gene_variant:-:-:-:-:-
chr01	6627885	T	A	L1-2-2-2-2-2-3-2-2	TH-KOR01,TH-KOR02,TH-KOR03,TH-KOR04,TH-KOR05,TH-KOR06,TH-KOR07,TH-KOR08	8	Macma4_01_g09330:intron_variant:-:-:-:-:-, Macma4_01_g09340:upstream_gene_variant:-:-:-:-:-
chr01	6631157	G	A	L2-1-1-1-1-3-2-2-2-2-3-2-2-1	ECU08	1	Macma4_01_g09330:downstream_gene_variant:-:-:-:-:-, Macma4_01_g09340:upstream_gene_variant:-:-:-:-:-
chr01	6632725	G	T	L1-2-2-2-2-2-3-2-2-1-2	TH-KOR02,TH-KOR04	2	Macma4_01_g09330:downstream_gene_variant:-:-:-:-:-, Macma4_01_g09340:upstream_gene_variant:-:-:-:-:-
chr01	6636689	A	T	L2-1-2-1-1-1-1-1-1-1-1-1-2	KOR03,KOR04	2	Macma4_01_g09340:intron_variant:-:-:-:-:-
chr01	6637050	A	C	L2-1-1-1-1-2-1	ES-CN20	1	Macma4_01_g09340:missense_variant:1207:856:286:S/R:Agc/Cgc
chr01	6638869	C	T	L2-1-2-1-1-1-2-1-2	GTM03	1	Macma4_01_g09340:downstream_gene_variant:-:-:-:-:-, Macma4_01_g09350:downstream_gene_variant:-:-:-:-:-
chr01	6642798	C	T	L2-1-1-1-1-3-2-2-1-1-1	ECU01	1	Macma4_01_g09340:downstream_gene_variant:-:-:-:-:-, Macma4_01_g09350:downstream_gene_variant:-:-:-:-:-, Macma4_01_g09360:downstream_gene_variant:-:-:-:-:-
chr01	6643492	C	T	L2-1-2-1-1-1-1-1-1-1-1-1-1-1-2	NIC02	1	Macma4_01_g09340:downstream_gene_variant:-:-:-:-:-, Macma4_01_g09350:downstream_gene_variant:-:-:-:-:-, Macma4_01_g09360:downstream_gene_variant:-:-:-:-:-
chr01	6644924	T	G	L2-1-1-1-1-2-2-2	GLP02	1	Macma4_01_g09350:intron_variant:-:-:-:-:-, Macma4_01_g09360:downstream_gene_variant:-:-:-:-:-
chr01	6646827	A	C	L2-1-2-1-1-1-1-1-1-1-1-2-1-3	HND02	1	Macma4_01_g09350:upstream_gene_variant:-:-:-:-:-, Macma4_01_g09360:downstream_gene_variant:-:-:-:-:-
chr01	6663051	G	T	L2-1-2-1-1-1-1-1-1-1-1-2-1-3	HND02	1	Macma4_01_g09370:upstream_gene_variant:-:-:-:-:-, Macma4_01_g09380:intron_variant:-:-:-:-:-, Macma4_01_g09390:downstream_gene_variant:-:-:-:-:-
chr01	6670932	C	A	L2-1-2-1-1-1-1-1-1-1-1-1-2	KOR03,KOR04	2	Macma4_01_g09390:upstream_gene_variant:-:-:-:-:-, Macma4_01_g09400:upstream_gene_variant:-:-:-:-:-
chr01	6672118	G	GA	L2	AUS01,AUS02,AUS03,AUS04,AUS05,AUS06,AUS07,AUS08,AUS09,AUS10,CMR01,CMR02,ES-CN01,ES-CN02,ES-CN03,ES-CN04,ES-CN05,ES-CN06,ES-CN07,ES-CN08,ES-CN09,ES-CN10,ES-CN11,ES-CN12,ES-CN13,ES-CN14,ES-CN15,ES-CN16,ES-CN17,ES-CN18,ES-CN19,ES-CN20,ES-CN21,ES-CN22,ES-CN23,ES-CN24,ES-CN25,ES-CN26,ES-CN27,ES-CN28,ES-CN29,ES-CN30,ES-CN31,ES-CN32,COL01,COL02,COL03,COL04,COL05,COL06,COL07,CRI01,CRI02,CRI03,CRI04,CRI05…	115	Macma4_01_g09390:upstream_gene_variant:-:-:-:-:-, Macma4_01_g09400:upstream_gene_variant:-:-:-:-:-
chr01	6676857	G	A	L1-2-2-2-2-2	CHN01,CHN02,CHN03,CHN04,CHN05,VNM10,TH-KOR01,TH-KOR02,TH-KOR03,TH-KOR04,TH-KOR05,TH-KOR06,TH-KOR07,TH-KOR08,VNM01,VNM03,VNM02,VNM05,VNM07	19	Macma4_01_g09400:intron_variant:-:-:-:-:-
chr01	6678967	T	C	L1-1	KOR06	1	Macma4_01_g09400:intron_variant:-:-:-:-:-
chr01	6680211	G	A	L2-1-2-1-1-1-1-1-1-1-1-1-1	ES-CN25,ES-CN26,ES-CN31,ES-CN32,COL07,CRI03,CRI04,CRI05,CRI09,CRI10,ECU02,ECU03,GLP01,NIC02	14	Macma4_01_g09400:intron_variant:-:-:-:-:-
chr01	6683673	G	A	L1-2-2-2-2-2-2-2-2-2	VNM07	1	Macma4_01_g09400:intron_variant:-:-:-:-:-
chr01	6683901	G	T	L1-2-2-2-2-1	VNM06	1	Macma4_01_g09400:intron_variant:-:-:-:-:-
chr01	6694016	T	A	L2-1-2-1-1-1-1-1-1-1-1-1-1-1-1-1-1-1-1	CRI10	1	Macma4_01_g09400:downstream_gene_variant:-:-:-:-:-, Macma4_01_g09410:intron_variant:-:-:-:-:-, Macma4_01_g09420:upstream_gene_variant:-:-:-:-:-
chr01	6695827	C	T	L1-2-1-2-2-2-2-1	PHL06	1	Macma4_01_g09400:downstream_gene_variant:-:-:-:-:-, Macma4_01_g09410:3_prime_UTR_variant:1208:-:-:-:-, Macma4_01_g09420:upstream_gene_variant:-:-:-:-:-
chr01	6695899	A	T	L2-1-2-1-1-1-1-1-1-1-1-2-1-3	HND02	1	Macma4_01_g09400:downstream_gene_variant:-:-:-:-:-, Macma4_01_g09410:3_prime_UTR_variant:1280:-:-:-:-, Macma4_01_g09420:upstream_gene_variant:-:-:-:-:-
chr01	6702855	A	T	L2-1-2-1-1-1-1-1-1-1-1-1-1-1-1-1-1-1-2	CRI09	1	Macma4_01_g09420:downstream_gene_variant:-:-:-:-:-, Macma4_01_g09430:upstream_gene_variant:-:-:-:-:-
chr01	6716563	G	A	L2-1-1-1-1-3-2-2-1-2-1	NIC01	1	Macma4_01_g09440:downstream_gene_variant:-:-:-:-:-, Macma4_01_g09450:downstream_gene_variant:-:-:-:-:-, Macma4_01_g09460:downstream_gene_variant:-:-:-:-:-
chr01	6717728	T	C	L1-2-2-2-2-2-2-1-1	VNM01	1	Macma4_01_g09450:downstream_gene_variant:-:-:-:-:-, Macma4_01_g09460:downstream_gene_variant:-:-:-:-:-
chr01	6736014	G	T	L2-1-2-1-1-1-1-1-1-1-2-1-2	PHL03	1	Macma4_01_g09470:upstream_gene_variant:-:-:-:-:-
chr01	6744536	A	C	L1-2-2-2-2-2-2-1	VNM01,VNM03,VNM02	3
chr01	6746036	C	A	L2-1-1-1-1-1-2-5-2-3-2-1	ES-CN05	1
chr01	6746762	A	G	L1-2-1-1	KOR01	1
chr01	6748036	C	G	L2-1-2-1-1-1-1-1-1-1-1-1-1-1-1-2-1	ES-CN25,ES-CN26	2
chr01	6752492	G	A	L2-1-2-1-1-1-1-1-1-1-1-1-1-1-1	ES-CN25,ES-CN26,ES-CN31,ES-CN32,COL07,CRI03,CRI04,CRI05,CRI09,CRI10,ECU02,ECU03	12	Macma4_01_g09480:upstream_gene_variant:-:-:-:-:-
chr01	6755618	C	A	L1-2-1-2-2-2-1	PHL05	1	Macma4_01_g09480:intron_variant:-:-:-:-:-
chr01	6766402	T	C	L2-1-1-1-1-1-2-5-2-3-1	ES-CN08	1	Macma4_01_g09490:downstream_gene_variant:-:-:-:-:-, Macma4_01_g09500:downstream_gene_variant:-:-:-:-:-
chr01	6768955	C	T	L2-1-2-1-2	GTM01	1	Macma4_01_g09490:downstream_gene_variant:-:-:-:-:-, Macma4_01_g09500:downstream_gene_variant:-:-:-:-:-
chr01	6769980	A	G	L2-1-2-1-1-1-1-1-1-1-1-2-2-1-2	ES-CN19	1	Macma4_01_g09490:downstream_gene_variant:-:-:-:-:-, Macma4_01_g09500:splice_region_variant,splice_polypyrimidine_tract_variant,intron_variant:-:-:-:-:-
chr01	6771337	C	A	L1-2-1-2-1	PHL10	1	Macma4_01_g09500:missense_variant:805:805:269:A/S:Gcc/Tcc
chr01	6777116	C	A	L2-1-1-1-1-1-2-2-2	ES-CN14	1	Macma4_01_g09500:upstream_gene_variant:-:-:-:-:-, Macma4_01_g09510:missense_variant:1586:1586:529:W/L:tGg/tTg
chr01	6777538	G	T	L1-1	KOR06	1	Macma4_01_g09510:synonymous_variant:1164:1164:388:A:gcC/gcA
chr01	6784122	T	C	L1-2-2-2-2-2-2-1-2	VNM03,VNM02	2	Macma4_01_g09520:missense_variant:68:68:23:M/T:aTg/aCg, Macma4_01_g09530:downstream_gene_variant:-:-:-:-:-
chr01	6785404	C	T	L2-1-2-1-1-1-1-1-1-1-1-1-1-1-1-2-2-1	ES-CN31	1	Macma4_01_g09520:downstream_gene_variant:-:-:-:-:-, Macma4_01_g09530:downstream_gene_variant:-:-:-:-:-
chr01	6788498	AG	A	L2-1-1-1-2-2	CRI07,ECU05	2	Macma4_01_g09520:downstream_gene_variant:-:-:-:-:-, Macma4_01_g09530:upstream_gene_variant:-:-:-:-:-, Macma4_01_g09540:upstream_gene_variant:-:-:-:-:-
chr01	6793959	C	T	L2-1-2-1-1-1-1-1-1-1-1-2-1-1-1-2	ECU07	1	Macma4_01_g09540:downstream_gene_variant:-:-:-:-:-, Macma4_01_g09550:downstream_gene_variant:-:-:-:-:-
chr01	6794621	G	A	L2-1-2-1-1-1-1-1-1-1-1-2-1-1-1-1	ECU09	1	Macma4_01_g09540:downstream_gene_variant:-:-:-:-:-, Macma4_01_g09550:downstream_gene_variant:-:-:-:-:-, Macma4_01_g09560:downstream_gene_variant:-:-:-:-:-
chr01	6795060	C	T	L1-2-1-2-2-1	VNM09	1	Macma4_01_g09540:downstream_gene_variant:-:-:-:-:-, Macma4_01_g09550:downstream_gene_variant:-:-:-:-:-, Macma4_01_g09560:downstream_gene_variant:-:-:-:-:-
chr01	6795932	ACAAATTGTTAAATGTAACATTATGGC	A	L2-2-2-1-2	UKN01	1	Macma4_01_g09540:downstream_gene_variant:-:-:-:-:-, Macma4_01_g09550:downstream_gene_variant:-:-:-:-:-, Macma4_01_g09560:downstream_gene_variant:-:-:-:-:-
chr01	6799255	C	T	L1-2-2-2-2-2-3-2-2-1-2-1	TH-KOR02	1	Macma4_01_g09550:upstream_gene_variant:-:-:-:-:-, Macma4_01_g09560:missense_variant:982:838:280:V/I:Gtc/Atc
chr01	6807655	A	C	L2-1-2-1-1-1-1-1-1-1-1-2-2-1-1	GLP03	1	Macma4_01_g09560:upstream_gene_variant:-:-:-:-:-, Macma4_01_g09570:upstream_gene_variant:-:-:-:-:-
chr01	6808399	G	T	L2-1-2-1-1-1-1-1-1-1-1-2-1-3	HND02	1	Macma4_01_g09560:upstream_gene_variant:-:-:-:-:-, Macma4_01_g09570:missense_variant:401:118:40:D/Y:Gac/Tac, Macma4_01_g09580:downstream_gene_variant:-:-:-:-:-
chr01	6811892	G	A	L2-1-2-1-1-1-1-1-1-1-1-1-1-2	GLP01	1	Macma4_01_g09570:downstream_gene_variant:-:-:-:-:-, Macma4_01_g09580:downstream_gene_variant:-:-:-:-:-
chr01	6816530	A	G	L2-1-2-1-1-1-1-1-1-1-1-2-1-1-1-2	ECU07	1	Macma4_01_g09580:intron_variant:-:-:-:-:-, Macma4_01_g09590:upstream_gene_variant:-:-:-:-:-
chr01	6817457	G	A	L2-1-2-1-1-1-1-1-1-1-1-1-1-1-1-1-1-2	CRI03,CRI04	2	Macma4_01_g09580:intron_variant:-:-:-:-:-, Macma4_01_g09590:upstream_gene_variant:-:-:-:-:-
chr01	6820693	A	C	L1-2-1-2-2-1	VNM09	1	Macma4_01_g09580:upstream_gene_variant:-:-:-:-:-, Macma4_01_g09590:upstream_gene_variant:-:-:-:-:-
chr01	6820721	G	C	L2-1-1-1-2-1-2	ES-CN17	1	Macma4_01_g09580:upstream_gene_variant:-:-:-:-:-, Macma4_01_g09590:upstream_gene_variant:-:-:-:-:-
chr01	6824857	C	A	L2-1-2-1-1-1-1-1-2	CRI02,CRI08	2	Macma4_01_g09580:upstream_gene_variant:-:-:-:-:-, Macma4_01_g09590:intron_variant:-:-:-:-:-
chr01	6844204	G	T	L2-1-1-1-1-3-2-2-1-2-2-2	ES-CN22	1	Macma4_01_g09620:intron_variant:-:-:-:-:-
chr01	6856687	G	A	L2-1-2-1-1-1-1-1-1-1-1-2-1-3	HND02	1	Macma4_01_g09620:downstream_gene_variant:-:-:-:-:-, Macma4_01_g09640:downstream_gene_variant:-:-:-:-:-
chr01	6857672	C	A	L2-1-2-1-1-1-1-1-1-1-1-1-1-1	ES-CN25,ES-CN26,ES-CN31,ES-CN32,COL07,CRI03,CRI04,CRI05,CRI09,CRI10,ECU02,ECU03,NIC02	13	Macma4_01_g09620:downstream_gene_variant:-:-:-:-:-, Macma4_01_g09640:downstream_gene_variant:-:-:-:-:-
chr01	6860939	G	T	L1-2-2-2-2-2-2-1-1	VNM01	1	Macma4_01_g09640:intron_variant:-:-:-:-:-
chr01	6870949	G	T	L2-1-2-1-1-1-2-2	ES-CN30	1	Macma4_01_g09640:upstream_gene_variant:-:-:-:-:-, Macma4_01_g09650:upstream_gene_variant:-:-:-:-:-
chr01	6871623	T	C	L1-2-2-2-2-2-3-2-1-1	VNM05	1	Macma4_01_g09640:upstream_gene_variant:-:-:-:-:-, Macma4_01_g09650:upstream_gene_variant:-:-:-:-:-
chr01	6887399	C	A	L2-1-2-1-1-1-1-2	MEX02	1	Macma4_01_g09660:intron_variant:-:-:-:-:-
chr01	6901826	A	G	L2-1-2-1-1-1-1-1-1-1-1-2-2-2	COL04	1	Macma4_01_g09670:upstream_gene_variant:-:-:-:-:-, Macma4_01_g09680:upstream_gene_variant:-:-:-:-:-
chr01	6905266	C	T	L1-2-2-2-2-2-3-2-2-2-2-1	TH-KOR07	1	Macma4_01_g09670:upstream_gene_variant:-:-:-:-:-, Macma4_01_g09680:synonymous_variant:223:180:60:P:ccC/ccT, Macma4_01_g09690:upstream_gene_variant:-:-:-:-:-
chr01	6907995	A	G	L2-1-2-1-1-1-1-1-2	CRI02,CRI08	2	Macma4_01_g09680:intron_variant:-:-:-:-:-, Macma4_01_g09690:upstream_gene_variant:-:-:-:-:-
chr01	6916838	C	A	L2-1-2-1-1-1-1-1-1-1-1-1-2	KOR03,KOR04	2	Macma4_01_g09690:downstream_gene_variant:-:-:-:-:-, Macma4_01_g09700:intron_variant:-:-:-:-:-
chr01	6917089	G	A	L2-1-2-2-1-1-2	PER04	1	Macma4_01_g09690:downstream_gene_variant:-:-:-:-:-, Macma4_01_g09700:intron_variant:-:-:-:-:-
chr01	6918027	C	G	L1-2-2-2-2-2-3-2-2-1-2-1	TH-KOR02	1	Macma4_01_g09690:downstream_gene_variant:-:-:-:-:-, Macma4_01_g09700:intron_variant:-:-:-:-:-
chr01	6918049	C	T	L2-1-1-1-1-3-2-2-2-2-3-2-1-2-1	KOR02	1	Macma4_01_g09690:downstream_gene_variant:-:-:-:-:-, Macma4_01_g09700:intron_variant:-:-:-:-:-
chr01	6921682	C	T	L1-2-1-1	KOR01	1	Macma4_01_g09700:missense_variant:485:485:162:C/Y:tGc/tAc, Macma4_01_g09710:upstream_gene_variant:-:-:-:-:-
chr01	6926397	C	T	L2-1-1-1-1-3-2-2-2-2-3-1	COL05	1	Macma4_01_g09700:upstream_gene_variant:-:-:-:-:-, Macma4_01_g09710:synonymous_variant:135:135:45:I:atC/atT
chr01	6926949	C	T	L2-1-1-1-1-2-2-2	GLP02	1	Macma4_01_g09700:upstream_gene_variant:-:-:-:-:-, Macma4_01_g09710:synonymous_variant:687:687:229:T:acC/acT
chr01	6929428	C	A	L2-1-2-1-1-1-1-1-1-1-1-1-1-1-1-2-1	ES-CN25,ES-CN26	2	Macma4_01_g09710:intron_variant:-:-:-:-:-, Macma4_01_g09720:upstream_gene_variant:-:-:-:-:-
chr01	6942722	C	A	L2-2-2-2-1	MEX01	1	Macma4_01_g09730:downstream_gene_variant:-:-:-:-:-
chr01	6954545	A	C	L2-1-1-1-1-1-2-1	ES-CN16	1	Macma4_01_g09740:downstream_gene_variant:-:-:-:-:-, Macma4_01_g09760:downstream_gene_variant:-:-:-:-:-
chr01	6955582	A	C	L2-1-2-1-1-1-1-1-1-1-1-2-2-1-1	GLP03	1	Macma4_01_g09740:downstream_gene_variant:-:-:-:-:-, Macma4_01_g09750:downstream_gene_variant:-:-:-:-:-, Macma4_01_g09760:intron_variant:-:-:-:-:-
chr01	6959296	T	A	L1-2-1-1	KOR01	1	Macma4_01_g09750:downstream_gene_variant:-:-:-:-:-, Macma4_01_g09760:stop_gained:403:295:99:K/*:Aag/Tag
chr01	6966155	G	A	L2-1-2-1-1-1-1-1-1-1-1-1-1-1-1	ES-CN25,ES-CN26,ES-CN31,ES-CN32,COL07,CRI03,CRI04,CRI05,CRI09,CRI10,ECU02,ECU03	12	Macma4_01_g09750:intron_variant:-:-:-:-:-
chr01	6967692	AT	A	L2-1-1-1-1-3-2-2-2-2-3-2-1-2	KOR02,KOR05	2	Macma4_01_g09750:intron_variant:-:-:-:-:-
chr01	6967694	T	A	L2-1-1-1-1-3-2-2-2-2-3-2-1-2	KOR02,KOR05	2	Macma4_01_g09750:intron_variant:-:-:-:-:-
chr01	6970541	G	A	L2-1-2-1-1-1-1-1-1-1-1-2-1-3	HND02	1	Macma4_01_g09750:intron_variant:-:-:-:-:-
chr01	6983638	T	C	L2-1-2-1-1-1-2-2	ES-CN30	1	Macma4_01_g09770:intron_variant:-:-:-:-:-
chr01	6986330	G	A	L2-1-1-1-2-2-1	CRI07	1	Macma4_01_g09770:downstream_gene_variant:-:-:-:-:-, Macma4_01_g09780:upstream_gene_variant:-:-:-:-:-, Macma4_01_g09790:upstream_gene_variant:-:-:-:-:-
chr01	6991528	C	A	L2-1-2-1-1-1-1-1-1-1-1-1-1-1-1-1-2	COL07	1	Macma4_01_g09780:downstream_gene_variant:-:-:-:-:-, Macma4_01_g09790:downstream_gene_variant:-:-:-:-:-, Macma4_01_g09800:upstream_gene_variant:-:-:-:-:-
chr01	6993477	G	C	L2-1-1-1-1-3-2-2-2-1	PHL08	1	Macma4_01_g09780:downstream_gene_variant:-:-:-:-:-, Macma4_01_g09790:downstream_gene_variant:-:-:-:-:-, Macma4_01_g09800:upstream_gene_variant:-:-:-:-:-
chr01	7007769	C	G	L2-1-2-1-1-1-1-1-1-1-1-2-1-3	HND02	1	Macma4_01_g09820:downstream_gene_variant:-:-:-:-:-
chr01	7010129	G	T	L2-1-2-1-1-1-1-1-1-2-2	PHL09	1	Macma4_01_g09820:downstream_gene_variant:-:-:-:-:-
chr01	7013815	G	A	L2-1-2-2-1-1-3	PER06	1	Macma4_01_g09820:upstream_gene_variant:-:-:-:-:-, Macma4_01_g09830:downstream_gene_variant:-:-:-:-:-, Macma4_01_g09840:upstream_gene_variant:-:-:-:-:-
chr01	7014027	G	C	L1-2-1-2-1	PHL10	1	Macma4_01_g09820:upstream_gene_variant:-:-:-:-:-, Macma4_01_g09830:downstream_gene_variant:-:-:-:-:-, Macma4_01_g09840:upstream_gene_variant:-:-:-:-:-
chr01	7020819	C	T	L2-1-1-1-1-3-1	AUS09	1	Macma4_01_g09830:upstream_gene_variant:-:-:-:-:-, Macma4_01_g09840:intron_variant:-:-:-:-:-, Macma4_01_g09850:downstream_gene_variant:-:-:-:-:-
chr01	7021708	A	G	L1-2-2-2-2-2-2-1	VNM01,VNM03,VNM02	3	Macma4_01_g09840:intron_variant:-:-:-:-:-, Macma4_01_g09850:downstream_gene_variant:-:-:-:-:-
chr01	7029747	G	A	L1-2-2-2-1	VNM04	1	Macma4_01_g09850:upstream_gene_variant:-:-:-:-:-
chr01	7031038	G	A	L2-1-1-1-1-3-2-2-2-2-3-2-2-2-2-1	CMR01	1	Macma4_01_g09860:upstream_gene_variant:-:-:-:-:-
chr01	7031403	C	T	L2-2-2-2-2	GTM02	1	Macma4_01_g09860:upstream_gene_variant:-:-:-:-:-
chr01	7050474	C	A	L2-1-2-1-1-1-1-1-1-1-1-2-1-3	HND02	1	Macma4_01_g09880:downstream_gene_variant:-:-:-:-:-
chr01	7055743	A	G	L1-2-2-2-2-2-3-2-2-2-2-1	TH-KOR07	1	Macma4_01_g09880:intron_variant:-:-:-:-:-, Macma4_01_g09890:downstream_gene_variant:-:-:-:-:-
chr01	7078741	C	T	L1-2-2-2-2-1	VNM06	1	Macma4_01_g09910:upstream_gene_variant:-:-:-:-:-, Macma4_01_g09920:upstream_gene_variant:-:-:-:-:-, Macma4_01_g09930:upstream_gene_variant:-:-:-:-:-, Macma4_01_g09940:upstream_gene_variant:-:-:-:-:-
chr01	7080764	C	A	L2-1-2-1-1-1-1-1-1-2-1	PAN01	1	Macma4_01_g09920:upstream_gene_variant:-:-:-:-:-, Macma4_01_g09930:upstream_gene_variant:-:-:-:-:-, Macma4_01_g09940:upstream_gene_variant:-:-:-:-:-
chr01	7081177	G	A	L2-1-2-1-1-1-1-1-1-1-1-1-1-1-1-1-1-1-1	CRI10	1	Macma4_01_g09940:upstream_gene_variant:-:-:-:-:-, Macma4_01_g09950:downstream_gene_variant:-:-:-:-:-
chr01	7081178	A	T	L2-1-2-1-1-1-1-1-1-1-1-1-1-1-1-1-1-1-1	CRI10	1	Macma4_01_g09940:upstream_gene_variant:-:-:-:-:-, Macma4_01_g09950:downstream_gene_variant:-:-:-:-:-
chr01	7081424	G	T	L2-1-2-1-1-2-1	ES-CN28	1	Macma4_01_g09940:upstream_gene_variant:-:-:-:-:-, Macma4_01_g09950:downstream_gene_variant:-:-:-:-:-
chr01	7081945	G	T	L1-2-1-1	KOR01	1	Macma4_01_g09940:5_prime_UTR_variant:124:-:-:-:-, Macma4_01_g09950:downstream_gene_variant:-:-:-:-:-
chr01	7082503	G	A	L1-2-2-2-2-2-3-2-2-1-1	TH-KOR01	1	Macma4_01_g09940:synonymous_variant:588:282:94:A:gcG/gcA, Macma4_01_g09950:downstream_gene_variant:-:-:-:-:-
chr01	7084752	C	A	L1-2-2-2-2-2-2-1	VNM01,VNM03,VNM02	3	Macma4_01_g09940:downstream_gene_variant:-:-:-:-:-, Macma4_01_g09950:downstream_gene_variant:-:-:-:-:-
chr01	7084773	G	T	L2-1-1-1-2-1-1	ES-CN18	1	Macma4_01_g09940:downstream_gene_variant:-:-:-:-:-, Macma4_01_g09950:downstream_gene_variant:-:-:-:-:-
chr01	7087915	C	A	L2-1-2-1-1-1-1-1-1-1-1-1-1-1-1-2-1	ES-CN25,ES-CN26	2	Macma4_01_g09940:downstream_gene_variant:-:-:-:-:-, Macma4_01_g09950:intron_variant:-:-:-:-:-, Macma4_01_g09960:upstream_gene_variant:-:-:-:-:-, Macma4_01_g09970:upstream_gene_variant:-:-:-:-:-
chr01	7090544	GTCGTTC	G	L2-1-2-1-1-1-1-1-1-1-1-1-1-1-1-3	ECU02,ECU03	2	Macma4_01_g09950:upstream_gene_variant:-:-:-:-:-, Macma4_01_g09960:upstream_gene_variant:-:-:-:-:-, Macma4_01_g09970:upstream_gene_variant:-:-:-:-:-
chr01	7091568	G	A	L2-1-2-1-1-1-1-1-1-1-1-1-1-1-1-3-2	ECU02	1	Macma4_01_g09950:upstream_gene_variant:-:-:-:-:-, Macma4_01_g09960:downstream_gene_variant:-:-:-:-:-, Macma4_01_g09970:intron_variant:-:-:-:-:-
chr01	7093311	C	A	L2-1-1-1-1-1-2-5-2-2	ES-CN23,ES-CN24	2	Macma4_01_g09950:upstream_gene_variant:-:-:-:-:-, Macma4_01_g09960:downstream_gene_variant:-:-:-:-:-, Macma4_01_g09970:missense_variant:238:238:80:L/I:Ctt/Att, Macma4_01_g09980:upstream_gene_variant:-:-:-:-:-
chr01	7093833	T	A	L2-1-2-1-1-1-1-1-1-1-1-1-1-1-1-2-1-2	ES-CN25	1	Macma4_01_g09950:upstream_gene_variant:-:-:-:-:-, Macma4_01_g09960:downstream_gene_variant:-:-:-:-:-, Macma4_01_g09970:intron_variant:-:-:-:-:-, Macma4_01_g09980:upstream_gene_variant:-:-:-:-:-
chr01	7094411	A	G	L2-1-1-1-1-3-2-2-2-2-3-2-2-2-2-1	CMR01	1	Macma4_01_g09950:upstream_gene_variant:-:-:-:-:-, Macma4_01_g09960:downstream_gene_variant:-:-:-:-:-, Macma4_01_g09970:intron_variant:-:-:-:-:-, Macma4_01_g09980:upstream_gene_variant:-:-:-:-:-
chr01	7094626	G	GTGA	L1-2-2-1	PHL01	1	Macma4_01_g09950:upstream_gene_variant:-:-:-:-:-, Macma4_01_g09960:downstream_gene_variant:-:-:-:-:-, Macma4_01_g09970:inframe_insertion:458-459:458-459:153:R/RD:cgt/cgTGAt, Macma4_01_g09980:upstream_gene_variant:-:-:-:-:-
chr01	7098362	C	T	L2-1-1-1-1-3-2-2-2-2-2-2-2	AUS05	1	Macma4_01_g09970:downstream_gene_variant:-:-:-:-:-, Macma4_01_g09980:missense_variant:1148:1064:355:A/V:gCg/gTg
chr01	7121027	T	A	L2-2-1-1-2	CRI06	1	Macma4_01_g10000:downstream_gene_variant:-:-:-:-:-, Macma4_01_g10010:downstream_gene_variant:-:-:-:-:-, Macma4_01_g10020:downstream_gene_variant:-:-:-:-:-
chr01	7122378	C	T	L2-1-2-1-1-1-1-1-1-1-1-1-1-1-1-2-2-2	CRI05	1	Macma4_01_g10010:downstream_gene_variant:-:-:-:-:-, Macma4_01_g10020:downstream_gene_variant:-:-:-:-:-
chr01	7123190	G	A	L2-1-1-1-1-3-2-1	DOM01,DOM02	2	Macma4_01_g10010:downstream_gene_variant:-:-:-:-:-, Macma4_01_g10020:downstream_gene_variant:-:-:-:-:-
chr01	7123261	G	C	L1-2-2-2-2-2-3-2-1-2	CHN02	1	Macma4_01_g10010:downstream_gene_variant:-:-:-:-:-, Macma4_01_g10020:downstream_gene_variant:-:-:-:-:-
chr01	7125578	G	T	L1-2-2-2-2-2-3-2-2-2-1	TH-KOR06,TH-KOR08	2	Macma4_01_g10020:missense_variant:608:491:164:P/Q:cCa/cAa, Macma4_01_g10030:upstream_gene_variant:-:-:-:-:-
chr01	7129124	C	T	L2-1-1-1-1-3-2-2-2-2-2-2-3-2	AUS04,AUS07	2	Macma4_01_g10020:upstream_gene_variant:-:-:-:-:-, Macma4_01_g10030:synonymous_variant:712:681:227:L:ctC/ctT, Macma4_01_g10040:upstream_gene_variant:-:-:-:-:-, Macma4_01_g10050:downstream_gene_variant:-:-:-:-:-
chr01	7131029	T	A	L1-2-1-1	KOR01	1	Macma4_01_g10020:upstream_gene_variant:-:-:-:-:-, Macma4_01_g10030:downstream_gene_variant:-:-:-:-:-, Macma4_01_g10040:upstream_gene_variant:-:-:-:-:-, Macma4_01_g10050:downstream_gene_variant:-:-:-:-:-
chr01	7133942	A	C	L1-2-2-2-2	CHN01,CHN02,CHN03,CHN04,CHN05,VNM10,TH-KOR01,TH-KOR02,TH-KOR03,TH-KOR04,TH-KOR05,TH-KOR06,TH-KOR07,TH-KOR08,VNM01,VNM03,VNM02,VNM05,VNM06,VNM07	20	Macma4_01_g10030:downstream_gene_variant:-:-:-:-:-, Macma4_01_g10040:downstream_gene_variant:-:-:-:-:-, Macma4_01_g10050:3_prime_UTR_variant:1040:-:-:-:-, Macma4_01_g10060:downstream_gene_variant:-:-:-:-:-, Macma4_01_g10070:downstream_gene_variant:-:-:-:-:-
chr01	7136377	G	T	L2-1-2-1-1-1-1-1-1-1-1-1-1-1-1-1-1-2	CRI03,CRI04	2	Macma4_01_g10040:downstream_gene_variant:-:-:-:-:-, Macma4_01_g10050:upstream_gene_variant:-:-:-:-:-, Macma4_01_g10060:downstream_gene_variant:-:-:-:-:-, Macma4_01_g10070:downstream_gene_variant:-:-:-:-:-, Macma4_01_g10080:upstream_gene_variant:-:-:-:-:-
chr01	7143700	C	T	L2-1-1-1-1-3-2-2-1-2-2-1	ES-CN21	1	Macma4_01_g10080:intron_variant:-:-:-:-:-
chr01	7155347	C	A	L2-1-2-1-1-1-1-1-1-1-1-1-1-1-1-1-2	COL07	1	Macma4_01_g10080:downstream_gene_variant:-:-:-:-:-, Macma4_01_g10090:intron_variant:-:-:-:-:-
chr01	7159859	G	A	L1-2-2-2-2-2-2-1	VNM01,VNM03,VNM02	3	Macma4_01_g10090:intron_variant:-:-:-:-:-
chr01	7161553	C	A	L2-1-1-1-1-2-2-2	GLP02	1	Macma4_01_g10090:3_prime_UTR_variant:1808:-:-:-:-
chr01	7163573	A	G	L2-1-1-1-1-1-2-4-2-2-2	ES-CN12	1	Macma4_01_g10090:downstream_gene_variant:-:-:-:-:-, Macma4_01_g10100:downstream_gene_variant:-:-:-:-:-
chr01	7169701	C	T	L2-1-2-1-1-1-1-1-1-1-1-1-1-1-1-2-2-2	CRI05	1	Macma4_01_g10100:upstream_gene_variant:-:-:-:-:-, Macma4_01_g10110:upstream_gene_variant:-:-:-:-:-, Macma4_01_g10120:upstream_gene_variant:-:-:-:-:-
chr01	7169705	C	T	L2-1-2-1-1-1-1-1-1-1-1-2-2-1-1	GLP03	1	Macma4_01_g10100:upstream_gene_variant:-:-:-:-:-, Macma4_01_g10110:upstream_gene_variant:-:-:-:-:-, Macma4_01_g10120:upstream_gene_variant:-:-:-:-:-
chr01	7195675	C	T	L2-1-1-2	VNM08	1	Macma4_01_g10160:upstream_gene_variant:-:-:-:-:-, Macma4_01_g10180:missense_variant:1713:1622:541:R/Q:cGg/cAg, Macma4_01_g10190:downstream_gene_variant:-:-:-:-:-
chr01	7197168	G	A	L2-1-1-1-1-3-2-2-1-1-1	ECU01	1	Macma4_01_g10180:synonymous_variant:220:129:43:H:caC/caT, Macma4_01_g10190:downstream_gene_variant:-:-:-:-:-
chr01	7211407	C	A	L2-1-2-1-1-1-1-1-1-1-1-1-1-1-2	NIC02	1	Macma4_01_g10190:missense_variant:145:43:15:G/C:Ggt/Tgt, Macma4_01_g10200:upstream_gene_variant:-:-:-:-:-
chr01	7213547	C	T	L2-1-1-1-1-3-2-2-1-2-2	ES-CN21,ES-CN22	2	Macma4_01_g10190:5_prime_UTR_variant:27:-:-:-:-, Macma4_01_g10200:upstream_gene_variant:-:-:-:-:-
chr01	7215460	A	C	L1-2-2-2-2-1	VNM06	1	Macma4_01_g10190:upstream_gene_variant:-:-:-:-:-, Macma4_01_g10200:intron_variant:-:-:-:-:-
chr01	7216436	G	A	L1-2-2-2-2-2-3-2-2-2-2-1	TH-KOR07	1	Macma4_01_g10190:upstream_gene_variant:-:-:-:-:-, Macma4_01_g10200:intron_variant:-:-:-:-:-
chr01	7219665	A	T	L1-2-2-2-2-2-2-2-2-1	CHN05	1	Macma4_01_g10200:intron_variant:-:-:-:-:-, Macma4_01_g10210:upstream_gene_variant:-:-:-:-:-
chr01	7225271	G	A	L2-1-1-1-1-2-1	ES-CN20	1	Macma4_01_g10200:downstream_gene_variant:-:-:-:-:-, Macma4_01_g10210:downstream_gene_variant:-:-:-:-:-, Macma4_01_g10220:downstream_gene_variant:-:-:-:-:-
chr01	7228921	T	C	L2-1-2-1-1-1-1-1-1-1-1-1-1-2	GLP01	1	Macma4_01_g10210:downstream_gene_variant:-:-:-:-:-, Macma4_01_g10220:intron_variant:-:-:-:-:-, Macma4_01_g10230:upstream_gene_variant:-:-:-:-:-
chr01	7230127	T	A	L1-2-1-2-1	PHL10	1	Macma4_01_g10220:intron_variant:-:-:-:-:-, Macma4_01_g10230:upstream_gene_variant:-:-:-:-:-
chr01	7230584	C	T	L2-2-1-2	COL02	1	Macma4_01_g10220:intron_variant:-:-:-:-:-, Macma4_01_g10230:upstream_gene_variant:-:-:-:-:-
chr01	7230614	C	A	L1-2-1-2-2-2	PHL02,PHL05,PHL06	3	Macma4_01_g10220:intron_variant:-:-:-:-:-, Macma4_01_g10230:upstream_gene_variant:-:-:-:-:-
chr01	7231425	A	T	L2-1-2-1-1-1-3	GHA01,GHA02	2	Macma4_01_g10220:intron_variant:-:-:-:-:-, Macma4_01_g10230:upstream_gene_variant:-:-:-:-:-
chr01	7237285	G	T	L2-1-1-1-1-3-2-2-2-2-3-2-2	CMR01,CMR02,ECU08,GHA03	4	Macma4_01_g10220:upstream_gene_variant:-:-:-:-:-, Macma4_01_g10230:synonymous_variant:534:450:150:V:gtG/gtT
chr01	7237724	C	T	L1-2-2-2-2-2-3-2-2-1-1	TH-KOR01	1	Macma4_01_g10230:intron_variant:-:-:-:-:-
chr01	7238408	A	T	L2-1-1-1-1-1-2-5-1	ES-CN01	1	Macma4_01_g10230:intron_variant:-:-:-:-:-, Macma4_01_g10240:downstream_gene_variant:-:-:-:-:-
chr01	7238623	G	A	L2-1-2-1-1-1-1-1-1-1-1-2-1-3	HND02	1	Macma4_01_g10230:intron_variant:-:-:-:-:-, Macma4_01_g10240:downstream_gene_variant:-:-:-:-:-
chr01	7239053	G	A	L2-2-1-1-1-3	COL01	1	Macma4_01_g10230:intron_variant:-:-:-:-:-, Macma4_01_g10240:downstream_gene_variant:-:-:-:-:-
chr01	7239821	G	C	L2-1-1-1-1-3-2-2-2-2-3-1	COL05	1	Macma4_01_g10230:intron_variant:-:-:-:-:-, Macma4_01_g10240:downstream_gene_variant:-:-:-:-:-
chr01	7241443	T	A	L2-1-2-1-1-1-1-1-1-1-1-2-2-2	COL04	1	Macma4_01_g10230:missense_variant:1087:1003:335:L/I:Tta/Ata, Macma4_01_g10240:downstream_gene_variant:-:-:-:-:-
chr01	7254814	C	T	L1-2-2-1	PHL01	1	Macma4_01_g10240:intron_variant:-:-:-:-:-
chr01	7256666	G	A	L1-2-2-2-2-2-3-2-2	TH-KOR01,TH-KOR02,TH-KOR03,TH-KOR04,TH-KOR05,TH-KOR06,TH-KOR07,TH-KOR08	8	Macma4_01_g10240:intron_variant:-:-:-:-:-, Macma4_01_g10250:downstream_gene_variant:-:-:-:-:-
chr01	7259723	T	A	L2-1-1-1-1-3-2-2-2-2-3-2-2	CMR01,CMR02,ECU08,GHA03	4	Macma4_01_g10240:5_prime_UTR_variant:665:-:-:-:-, Macma4_01_g10250:downstream_gene_variant:-:-:-:-:-
chr01	7260088	G	A	L2-1-1-1-1-2-1	ES-CN20	1	Macma4_01_g10240:5_prime_UTR_variant:300:-:-:-:-, Macma4_01_g10250:downstream_gene_variant:-:-:-:-:-
chr01	7260369	G	T	L2-1-1-1-1-3-2-2-1-2-2-2	ES-CN22	1	Macma4_01_g10240:5_prime_UTR_variant:19:-:-:-:-, Macma4_01_g10250:downstream_gene_variant:-:-:-:-:-
chr01	7260982	T	C	L2-1-2-1-1-1-1-1-1-1-1-1-1-1-1-3-1	ECU03	1	Macma4_01_g10240:upstream_gene_variant:-:-:-:-:-, Macma4_01_g10250:downstream_gene_variant:-:-:-:-:-
chr01	7267902	G	T	L2-1-2-1-1-1-3-2	GHA01	1	Macma4_01_g10250:upstream_gene_variant:-:-:-:-:-, Macma4_01_g10260:5_prime_UTR_variant:224:-:-:-:-
chr01	7272831	G	A	L2-1-2-1-1-1-2-1-2	GTM03	1	Macma4_01_g10260:downstream_gene_variant:-:-:-:-:-
chr01	7274008	G	T	L2-2-2-1-2	UKN01	1	Macma4_01_g10260:downstream_gene_variant:-:-:-:-:-, Macma4_01_g10270:downstream_gene_variant:-:-:-:-:-
chr01	7277679	T	A	L1-1	KOR06	1	Macma4_01_g10270:downstream_gene_variant:-:-:-:-:-, Macma4_01_g10280:downstream_gene_variant:-:-:-:-:-
chr01	7313332	A	G	L1-2-2-2-2-2-3-2-2-2-2-1	TH-KOR07	1	Macma4_01_g10340:upstream_gene_variant:-:-:-:-:-, Macma4_01_g10350:downstream_gene_variant:-:-:-:-:-, Macma4_01_g10360:upstream_gene_variant:-:-:-:-:-
chr01	7315147	G	T	L2-1-2-1-1-1-1-1-2	CRI02,CRI08	2	Macma4_01_g10340:upstream_gene_variant:-:-:-:-:-, Macma4_01_g10350:upstream_gene_variant:-:-:-:-:-, Macma4_01_g10360:upstream_gene_variant:-:-:-:-:-
chr01	7319287	C	G	L2-1-1-1-2-1-1	ES-CN18	1	Macma4_01_g10350:upstream_gene_variant:-:-:-:-:-, Macma4_01_g10360:intron_variant:-:-:-:-:-
chr01	7332013	G	A	L2-1-2-1-1-1-1-1-1-1-1-1-1-1-1-3	ECU02,ECU03	2	Macma4_01_g10370:synonymous_variant:108:108:36:L:ctC/ctT
chr01	7339231	C	G	L1-2-2-2-2-2-3-2-2-1-2	TH-KOR02,TH-KOR04	2	Macma4_01_g10380:intron_variant:-:-:-:-:-, Macma4_01_g10390:upstream_gene_variant:-:-:-:-:-
chr01	7347177	G	T	L1-2-2-2-2-2-3-2-2	TH-KOR01,TH-KOR02,TH-KOR03,TH-KOR04,TH-KOR05,TH-KOR06,TH-KOR07,TH-KOR08	8	Macma4_01_g10390:downstream_gene_variant:-:-:-:-:-, Macma4_01_g10400:downstream_gene_variant:-:-:-:-:-, Macma4_01_g10410:downstream_gene_variant:-:-:-:-:-
chr01	7349320	G	C	L2-2-2-2-2	GTM02	1	Macma4_01_g10390:downstream_gene_variant:-:-:-:-:-, Macma4_01_g10400:upstream_gene_variant:-:-:-:-:-, Macma4_01_g10410:downstream_gene_variant:-:-:-:-:-
chr01	7352643	AC	A	L1-2-2-2-2	CHN01,CHN02,CHN03,CHN04,CHN05,VNM10,TH-KOR01,TH-KOR02,TH-KOR03,TH-KOR04,TH-KOR05,TH-KOR06,TH-KOR07,TH-KOR08,VNM01,VNM03,VNM02,VNM05,VNM06,VNM07	20	Macma4_01_g10400:upstream_gene_variant:-:-:-:-:-, Macma4_01_g10410:intron_variant:-:-:-:-:-
chr01	7358154	T	A	L1-2-2-2-2-2-1	CHN01	1	Macma4_01_g10410:intron_variant:-:-:-:-:-
chr01	7359669	C	T	L2-1-2-1-1-1-1-1-1-1-1-2-2-1	ES-CN19,GLP03	2	Macma4_01_g10410:intron_variant:-:-:-:-:-
chr01	7361304	C	T	L2-1-1-1-1-3-2-2-2-2-3-2-2	CMR01,CMR02,ECU08,GHA03	4	Macma4_01_g10410:intron_variant:-:-:-:-:-
chr01	7372015	C	T	L2-1-2-1-1-1-1-1-1-1-1-2-1	ECU06,ECU07,ECU09,GHA04,HND02	5	Macma4_01_g10420:synonymous_variant:1245:1245:415:L:ctG/ctA
chr01	7372840	T	A	L2-2-1-1-1-3	COL01	1	Macma4_01_g10420:splice_acceptor_variant:-:-:-:-:-
chr01	7383338	A	C	L2-1-1-1-1-3-2-2-1-1-2-1	PHL07	1	Macma4_01_g10430:missense_variant:277:98:33:K/T:aAg/aCg, Macma4_01_g10440:upstream_gene_variant:-:-:-:-:-, Macma4_01_g10450:upstream_gene_variant:-:-:-:-:-
chr01	7383344	C	A	L2-1-1-1-1-3-2-2-1-1-2-1	PHL07	1	Macma4_01_g10430:missense_variant:283:104:35:A/D:gCc/gAc, Macma4_01_g10440:upstream_gene_variant:-:-:-:-:-, Macma4_01_g10450:upstream_gene_variant:-:-:-:-:-
chr01	7383345	C	A	L2-1-1-1-1-3-2-2-1-1-2-1	PHL07	1	Macma4_01_g10430:synonymous_variant:284:105:35:A:gcC/gcA, Macma4_01_g10440:upstream_gene_variant:-:-:-:-:-, Macma4_01_g10450:upstream_gene_variant:-:-:-:-:-
chr01	7390538	A	G	L1-2-2-2-2-2-3-2-2-1-1	TH-KOR01	1	Macma4_01_g10440:downstream_gene_variant:-:-:-:-:-, Macma4_01_g10450:downstream_gene_variant:-:-:-:-:-, Macma4_01_g10460:upstream_gene_variant:-:-:-:-:-
chr01	7405650	GC	G	L1-2-2-2-2-2-3-2-1-2	CHN02	1	Macma4_01_g10480:upstream_gene_variant:-:-:-:-:-, Macma4_01_g10490:frameshift_variant:352:352:118:Q/X:Caa/aa
chr01	7411131	C	T	L2-1-1-1-1-1-2-5-2-3-1	ES-CN08	1	Macma4_01_g10490:intron_variant:-:-:-:-:-, Macma4_01_g10500:downstream_gene_variant:-:-:-:-:-
chr01	7412535	G	T	L1-2-2-2-2-2-2-1	VNM01,VNM03,VNM02	3	Macma4_01_g10490:intron_variant:-:-:-:-:-, Macma4_01_g10500:downstream_gene_variant:-:-:-:-:-
chr01	7412999	T	C	L2-1-1-1-1-3-2-2-1-1-1	ECU01	1	Macma4_01_g10490:intron_variant:-:-:-:-:-, Macma4_01_g10500:downstream_gene_variant:-:-:-:-:-
chr01	7419638	G	A	L1-2-1-2-2-2-2-1	PHL06	1	Macma4_01_g10500:intron_variant:-:-:-:-:-, Macma4_01_g10510:upstream_gene_variant:-:-:-:-:-
chr01	7423763	C	T	L2-1-1-1-1-2-1	ES-CN20	1	Macma4_01_g10500:upstream_gene_variant:-:-:-:-:-, Macma4_01_g10510:intron_variant:-:-:-:-:-
chr01	7425851	A	G	L2-1-1-1-1-3-2-1-2	DOM02	1	Macma4_01_g10500:upstream_gene_variant:-:-:-:-:-, Macma4_01_g10510:intron_variant:-:-:-:-:-, Macma4_01_g10520:upstream_gene_variant:-:-:-:-:-
chr01	7430539	T	C	L2-1-1-1-1-3-2-2-2-2-3-1	COL05	1	Macma4_01_g10510:downstream_gene_variant:-:-:-:-:-, Macma4_01_g10520:upstream_gene_variant:-:-:-:-:-, Macma4_01_g10530:upstream_gene_variant:-:-:-:-:-, Macma4_01_g10540:downstream_gene_variant:-:-:-:-:-
chr01	7430651	C	T	L2-1-1-1-1-1-2-5-2-1	ES-CN06	1	Macma4_01_g10510:downstream_gene_variant:-:-:-:-:-, Macma4_01_g10520:missense_variant:5:5:2:S/F:tCt/tTt, Macma4_01_g10530:upstream_gene_variant:-:-:-:-:-, Macma4_01_g10540:downstream_gene_variant:-:-:-:-:-
chr01	7437427	A	C	L2-1-1-1-1-3-2-2-2-2-3-2-2-2-2-1	CMR01	1	Macma4_01_g10520:downstream_gene_variant:-:-:-:-:-, Macma4_01_g10530:downstream_gene_variant:-:-:-:-:-, Macma4_01_g10540:upstream_gene_variant:-:-:-:-:-, Macma4_01_g10550:upstream_gene_variant:-:-:-:-:-
chr01	7437638	C	T	L2-1-1-1-1-1-2-3	ES-CN03,ES-CN04,ES-CN09,ES-CN10	4	Macma4_01_g10520:downstream_gene_variant:-:-:-:-:-, Macma4_01_g10530:downstream_gene_variant:-:-:-:-:-, Macma4_01_g10540:upstream_gene_variant:-:-:-:-:-, Macma4_01_g10550:upstream_gene_variant:-:-:-:-:-
chr01	7441970	C	T	L2-1-2-1-1-1-1-1-1-1-3	HND01	1	Macma4_01_g10550:3_prime_UTR_variant:1508:-:-:-:-
chr01	7444690	G	C	L1-2-2-2-2-2-3-2-2	TH-KOR01,TH-KOR02,TH-KOR03,TH-KOR04,TH-KOR05,TH-KOR06,TH-KOR07,TH-KOR08	8	Macma4_01_g10550:downstream_gene_variant:-:-:-:-:-, Macma4_01_g10560:downstream_gene_variant:-:-:-:-:-
chr01	7445418	C	A	L2-1-2-2-1-2	ECU10,PER02	2	Macma4_01_g10550:downstream_gene_variant:-:-:-:-:-, Macma4_01_g10560:downstream_gene_variant:-:-:-:-:-
chr01	7445911	C	T	L2-1-1-1-1-3-2-2-1-1-1	ECU01	1	Macma4_01_g10550:downstream_gene_variant:-:-:-:-:-, Macma4_01_g10560:downstream_gene_variant:-:-:-:-:-
chr01	7449088	TA	T	L2-1-2-1-1-1-1-1-1-1-1-2-1-3	HND02	1	Macma4_01_g10560:downstream_gene_variant:-:-:-:-:-, Macma4_01_g10570:upstream_gene_variant:-:-:-:-:-
chr01	7466607	C	A	L2-1-1-1-1-3-2-2-2-2-3-2-2-1	ECU08	1	Macma4_01_g10570:downstream_gene_variant:-:-:-:-:-, Macma4_01_g10580:downstream_gene_variant:-:-:-:-:-, Macma4_01_g10590:intron_variant:-:-:-:-:-, Macma4_01_g10600:upstream_gene_variant:-:-:-:-:-
chr01	7475194	AC	A	L2-1-2-1-1-1-1-1-1-1-2-1-1	PHL04	1	Macma4_01_g10600:splice_polypyrimidine_tract_variant,intron_variant:-:-:-:-:-, Macma4_01_g10610:downstream_gene_variant:-:-:-:-:-
chr01	7477701	C	T	L2-1-1-1-1-3-2-2-2-2-3-2-2	CMR01,CMR02,ECU08,GHA03	4	Macma4_01_g10600:downstream_gene_variant:-:-:-:-:-, Macma4_01_g10610:missense_variant:572:502:168:G/R:Gga/Aga
chr01	7490635	G	A	L1-2-2-2-2-2-2-1-2	VNM03,VNM02	2	Macma4_01_g10620:intron_variant:-:-:-:-:-
chr01	7490636	T	A	L1-2-2-2-2-2-2-1-2	VNM03,VNM02	2	Macma4_01_g10620:intron_variant:-:-:-:-:-
chr01	7491079	G	T	L2-1-2-1-1-1-1-1-1-1-1-2-2-2	COL04	1	Macma4_01_g10620:splice_polypyrimidine_tract_variant,intron_variant:-:-:-:-:-
chr01	7496258	A	G	L1-2-1-2-1	PHL10	1	Macma4_01_g10620:intron_variant:-:-:-:-:-
chr01	7498549	T	A	L2-1-2-1-1-1-1-1-1-1-1-1-1-1-1-2-1-2	ES-CN25	1	Macma4_01_g10620:intron_variant:-:-:-:-:-
chr01	7507243	T	C	L2-1-1-2	VNM08	1	Macma4_01_g10620:downstream_gene_variant:-:-:-:-:-, Macma4_01_g10630:downstream_gene_variant:-:-:-:-:-, Macma4_01_g10640:intron_variant:-:-:-:-:-
chr01	7508619	A	C	L2-1-2-1-1-1-1-1-1-2-1	PAN01	1	Macma4_01_g10630:downstream_gene_variant:-:-:-:-:-, Macma4_01_g10640:intron_variant:-:-:-:-:-
chr01	7511768	G	A	L2-2-1-1-1-3	COL01	1	Macma4_01_g10640:intron_variant:-:-:-:-:-, Macma4_01_g10650:upstream_gene_variant:-:-:-:-:-
chr01	7519963	AG	A	L1-2-2-2-2-2-1	CHN01	1	Macma4_01_g10650:frameshift_variant:1686:1654:552:A/X:Gct/ct
chr01	7543894	C	A	L2-1-2-1-1-1-1-2	MEX02	1	Macma4_01_g10680:intron_variant:-:-:-:-:-
chr01	7546495	C	A	L2-1-2-1-1-1-1-1-1-1-1-2-1-1-1-2	ECU07	1	Macma4_01_g10680:upstream_gene_variant:-:-:-:-:-, Macma4_01_g10690:downstream_gene_variant:-:-:-:-:-
chr01	7546541	G	A	L2-1-2-1-1-1-1-1-1-1-1-1-1-1-1-1-2	COL07	1	Macma4_01_g10680:upstream_gene_variant:-:-:-:-:-, Macma4_01_g10690:downstream_gene_variant:-:-:-:-:-
chr01	7548162	G	A	L2-1-2-1-1-1-1-1-1-1-1-2-1-3	HND02	1	Macma4_01_g10680:upstream_gene_variant:-:-:-:-:-, Macma4_01_g10690:downstream_gene_variant:-:-:-:-:-
chr01	7549406	T	C	L2-1-2-1-1-1-1-1-1-1-3	HND01	1	Macma4_01_g10680:upstream_gene_variant:-:-:-:-:-, Macma4_01_g10690:downstream_gene_variant:-:-:-:-:-
chr01	7552642	T	C	L1-2-2-2-2-2-2-1-1	VNM01	1	Macma4_01_g10690:missense_variant:986:667:223:I/V:Att/Gtt
chr01	7555219	T	A	L1-2-2-2-2-2-3-2-2-1-2	TH-KOR02,TH-KOR04	2	Macma4_01_g10690:intron_variant:-:-:-:-:-
chr01	7557408	C	A	L1-2-2-2-2-2-3-2-1	CHN02,VNM05	2	Macma4_01_g10690:upstream_gene_variant:-:-:-:-:-
chr01	7559058	G	A	L1-2-2-2-2-2-3-2-2-2-2-1	TH-KOR07	1	Macma4_01_g10690:upstream_gene_variant:-:-:-:-:-
chr01	7563290	C	T	L2-1-2-1-1-1-1-1-1-2	PAN01,PHL09	2	Macma4_01_g10700:downstream_gene_variant:-:-:-:-:-
chr01	7563562	G	A	L2-1-2-1-1-1-1-1-1-1-1-2-1-3	HND02	1	Macma4_01_g10700:downstream_gene_variant:-:-:-:-:-
chr01	7568010	T	G	L2-1-1-1-1-3-2-2-2-2-3-2-2-2-1	CMR02	1	Macma4_01_g10700:upstream_gene_variant:-:-:-:-:-, Macma4_01_g10710:upstream_gene_variant:-:-:-:-:-
chr01	7581667	C	T	L2-2-1-1-1-2	PER03	1	Macma4_01_g10710:intron_variant:-:-:-:-:-
chr01	7582091	T	C	L1-2-2	CHN01,CHN02,CHN03,CHN04,CHN05,VNM10,TH-KOR01,TH-KOR02,TH-KOR03,TH-KOR04,TH-KOR05,TH-KOR06,TH-KOR07,TH-KOR08,PHL01,VNM01,VNM03,VNM02,VNM04,VNM05,VNM06,VNM07	22	Macma4_01_g10710:intron_variant:-:-:-:-:-
chr01	7608326	T	C	L2-1-2-1-1-1-3	GHA01,GHA02	2	Macma4_01_g10730:downstream_gene_variant:-:-:-:-:-, Macma4_01_g10740:upstream_gene_variant:-:-:-:-:-
chr01	7615300	C	T	L1-1	KOR06	1	Macma4_01_g10730:upstream_gene_variant:-:-:-:-:-, Macma4_01_g10750:upstream_gene_variant:-:-:-:-:-
chr01	7616703	G	T	L1-2-1-2-2-2-2-2	PHL02	1	Macma4_01_g10730:upstream_gene_variant:-:-:-:-:-, Macma4_01_g10750:upstream_gene_variant:-:-:-:-:-
chr01	7620687	G	A	L2-1-1-1-1-3-2-2-2-2-3-2-1-1	DOM03	1	Macma4_01_g10750:intron_variant:-:-:-:-:-
chr01	7624319	C	T	L1-1	KOR06	1	Macma4_01_g10750:synonymous_variant:3009:2640:880:F:ttC/ttT
chr01	7636615	G	T	L2-1-2-1-1-1-1-1-1-1-2-1-2	PHL03	1	Macma4_01_g10760:upstream_gene_variant:-:-:-:-:-
chr01	7637787	A	G	L2-1-2-1-1-1-1-1-1-1-1-2-2-1-1	GLP03	1	Macma4_01_g10760:upstream_gene_variant:-:-:-:-:-
chr01	7648942	GATATATATATATATATATATATATATATATATATAT	G	L2-1-1-1-1-3-2-2-1-1-2-2	AUS03	1	Macma4_01_g10760:downstream_gene_variant:-:-:-:-:-, Macma4_01_g10770:upstream_gene_variant:-:-:-:-:-
chr01	7653218	T	A	L2-1-2-1-1-1-1-1-1-1-1-1-1-1-1-1-1-2-2	CRI03	1	Macma4_01_g10770:intron_variant:-:-:-:-:-
chr01	7656741	A	G	L1-2-2-2-1	VNM04	1	Macma4_01_g10770:intron_variant:-:-:-:-:-, Macma4_01_g10780:downstream_gene_variant:-:-:-:-:-
chr01	7657420	T	C	L2-1-1-1-1-3-2-2-1-2-2-2	ES-CN22	1	Macma4_01_g10770:intron_variant:-:-:-:-:-, Macma4_01_g10780:downstream_gene_variant:-:-:-:-:-
chr01	7658521	ATC	A	L1-2-2-2-2-2-3-2-2	TH-KOR01,TH-KOR02,TH-KOR03,TH-KOR04,TH-KOR05,TH-KOR06,TH-KOR07,TH-KOR08	8	Macma4_01_g10770:intron_variant:-:-:-:-:-, Macma4_01_g10780:downstream_gene_variant:-:-:-:-:-
chr01	7660577	G	A	L2-1-2-1-1-1-1-1-1-1-1-2-1-1-2	ECU06	1	Macma4_01_g10770:downstream_gene_variant:-:-:-:-:-, Macma4_01_g10780:missense_variant:534:505:169:P/S:Ccc/Tcc
chr01	7663643	C	T	L2-2-1-1-1-3	COL01	1	Macma4_01_g10770:downstream_gene_variant:-:-:-:-:-, Macma4_01_g10780:upstream_gene_variant:-:-:-:-:-, Macma4_01_g10790:downstream_gene_variant:-:-:-:-:-
chr01	7667147	C	T	L2-1-1-1-1-3-2-2	AUS01,AUS02,AUS03,AUS04,AUS05,AUS06,AUS07,AUS08,AUS10,CMR01,CMR02,ES-CN21,ES-CN22,COL05,DOM03,ECU01,ECU08,GHA03,KOR02,KOR05,NIC01,PHL07,PHL08	23	Macma4_01_g10790:intron_variant:-:-:-:-:-, Macma4_01_g10800:downstream_gene_variant:-:-:-:-:-
chr01	7668824	A	T	L2-1-2-1-1-1-1-1-1-1-1-2-1-2	GHA04	1	Macma4_01_g10790:intron_variant:-:-:-:-:-, Macma4_01_g10800:downstream_gene_variant:-:-:-:-:-
chr01	7670376	C	T	L2-1-1-1-1-3-2-2-2-2-3-1	COL05	1	Macma4_01_g10790:5_prime_UTR_variant:443:-:-:-:-, Macma4_01_g10800:downstream_gene_variant:-:-:-:-:-
chr01	7672827	G	A	L2-1-2-1-1-1-1-1-1-1-1-1-1-1-1-1-2	COL07	1	Macma4_01_g10790:upstream_gene_variant:-:-:-:-:-, Macma4_01_g10800:intron_variant:-:-:-:-:-
chr01	7687018	C	A	L1-2-1-2-1	PHL10	1	Macma4_01_g10810:downstream_gene_variant:-:-:-:-:-
chr01	7691508	T	C	L2-1-2-1-1-1-1-2	MEX02	1
chr01	7691942	TA	T	L2-1-1-1-1-3-2-2-2-2-2-2-2	AUS05	1
chr01	7694079	G	A	L2-1-2-1-1-1-1-1-1-1-1-1-1-1-1-2-2-2	CRI05	1	Macma4_01_g10820:upstream_gene_variant:-:-:-:-:-
chr01	7700261	C	G	L2-1-1-1-1-1-2-3-1	ES-CN03,ES-CN04	2	Macma4_01_g10820:downstream_gene_variant:-:-:-:-:-, Macma4_01_g10830:missense_variant:1278:1068:356:E/D:gaG/gaC, Macma4_01_g10840:downstream_gene_variant:-:-:-:-:-
chr01	7700291	G	T	L2-1-1-1-1-3-2-2-2-2-2-2-1	AUS08	1	Macma4_01_g10820:downstream_gene_variant:-:-:-:-:-, Macma4_01_g10830:missense_variant:1248:1038:346:D/E:gaC/gaA, Macma4_01_g10840:downstream_gene_variant:-:-:-:-:-
chr01	7705066	C	A	L2-1-1-1-1-3-1	AUS09	1	Macma4_01_g10830:upstream_gene_variant:-:-:-:-:-, Macma4_01_g10840:intron_variant:-:-:-:-:-
chr01	7718378	A	C	L2-1-1-1-1-3-2-2-2-2-3-2-2-2-2-1	CMR01	1	Macma4_01_g10850:intron_variant:-:-:-:-:-, Macma4_01_g10860:downstream_gene_variant:-:-:-:-:-
chr01	7730182	T	G	L1-2-1-2-2-2-1	PHL05	1	Macma4_01_g10870:downstream_gene_variant:-:-:-:-:-, Macma4_01_g10880:missense_variant:309:257:86:E/A:gAg/gCg, Macma4_01_g10890:upstream_gene_variant:-:-:-:-:-, Macma4_01_g10900:downstream_gene_variant:-:-:-:-:-
chr01	7731348	A	G	L2-1-1-1-1-2-2-1	COL03	1	Macma4_01_g10870:downstream_gene_variant:-:-:-:-:-, Macma4_01_g10880:upstream_gene_variant:-:-:-:-:-, Macma4_01_g10890:upstream_gene_variant:-:-:-:-:-, Macma4_01_g10900:downstream_gene_variant:-:-:-:-:-
chr01	7748751	C	G	L2-1-1-1-1-3-2-2-2-2-3-2-1	DOM03,KOR02,KOR05	3	Macma4_01_g10900:intron_variant:-:-:-:-:-, Macma4_01_g10910:downstream_gene_variant:-:-:-:-:-
chr01	7753595	A	G	L1-2-1-2-2-2-2-2	PHL02	1	Macma4_01_g10900:upstream_gene_variant:-:-:-:-:-, Macma4_01_g10910:intron_variant:-:-:-:-:-, Macma4_01_g10920:upstream_gene_variant:-:-:-:-:-
chr01	7754528	G	T	L2-1-2-1-1-1-1-1-1-2-2	PHL09	1	Macma4_01_g10900:upstream_gene_variant:-:-:-:-:-, Macma4_01_g10910:intron_variant:-:-:-:-:-, Macma4_01_g10920:upstream_gene_variant:-:-:-:-:-
chr01	7758652	T	C	L2-1-1-1-1-3-2-2-2-2-3-2-1-2	KOR02,KOR05	2	Macma4_01_g10910:upstream_gene_variant:-:-:-:-:-, Macma4_01_g10920:intron_variant:-:-:-:-:-
chr01	7759601	C	G	L1-2-2-2-2-2-3-1-1	CHN03	1	Macma4_01_g10910:upstream_gene_variant:-:-:-:-:-, Macma4_01_g10920:intron_variant:-:-:-:-:-
chr01	7768292	G	T	L2-1-2-1-1-1-1-1-1-1-1-1-1-1-1-2-1-2	ES-CN25	1	Macma4_01_g10930:intron_variant:-:-:-:-:-
chr01	7773450	C	G	L2-1-2-1-1-1-1-1-1-1-1-2-1-1-2	ECU06	1	Macma4_01_g10930:downstream_gene_variant:-:-:-:-:-, Macma4_01_g10940:downstream_gene_variant:-:-:-:-:-
chr01	7776171	G	A	L1-2-2-2-2-1	VNM06	1	Macma4_01_g10930:downstream_gene_variant:-:-:-:-:-, Macma4_01_g10940:intron_variant:-:-:-:-:-
chr01	7780168	T	C	L2-1-2-1-1-1-1-1-1-1-1-2-2-1-1	GLP03	1	Macma4_01_g10940:upstream_gene_variant:-:-:-:-:-, Macma4_01_g10950:upstream_gene_variant:-:-:-:-:-
chr01	7786535	G	A	L2-1-2-1-1-1-1-1-1-1-1-2-2-2	COL04	1	Macma4_01_g10950:intron_variant:-:-:-:-:-
chr01	7791988	G	A	L2-2-1-1-1-3	COL01	1	Macma4_01_g10950:downstream_gene_variant:-:-:-:-:-, Macma4_01_g10960:missense_variant:86:86:29:P/L:cCc/cTc, Macma4_01_g10970:upstream_gene_variant:-:-:-:-:-
chr01	7793229	A	AAGAGAGAGAGAGAG	L2-1-1-1-1-1-2-3	ES-CN03,ES-CN04,ES-CN09,ES-CN10	4	Macma4_01_g10950:downstream_gene_variant:-:-:-:-:-, Macma4_01_g10960:upstream_gene_variant:-:-:-:-:-, Macma4_01_g10970:upstream_gene_variant:-:-:-:-:-
chr01	7796257	T	A	L2-1-1-1-2-2	CRI07,ECU05	2	Macma4_01_g10960:upstream_gene_variant:-:-:-:-:-, Macma4_01_g10970:upstream_gene_variant:-:-:-:-:-
chr01	7799200	GA	G	L2-1-2-1-2	GTM01	1	Macma4_01_g10970:intron_variant:-:-:-:-:-, Macma4_01_g10980:downstream_gene_variant:-:-:-:-:-
chr01	7802415	ATCTTCTCTT	A	L2-1-1-1-1-3-2-2-2-2-3-2-2-2-2-2	GHA03	1	Macma4_01_g10970:intron_variant:-:-:-:-:-, Macma4_01_g10980:downstream_gene_variant:-:-:-:-:-
chr01	7808438	G	C	L2-1-1-1-1-2-1	ES-CN20	1	Macma4_01_g10980:upstream_gene_variant:-:-:-:-:-, Macma4_01_g10990:upstream_gene_variant:-:-:-:-:-, Macma4_01_g11000:upstream_gene_variant:-:-:-:-:-, Macma4_01_g11010:upstream_gene_variant:-:-:-:-:-
chr01	7810379	C	A	L1-2-2-2-2-2-2-1	VNM01,VNM03,VNM02	3	Macma4_01_g10980:upstream_gene_variant:-:-:-:-:-, Macma4_01_g10990:upstream_gene_variant:-:-:-:-:-, Macma4_01_g11000:upstream_gene_variant:-:-:-:-:-, Macma4_01_g11010:upstream_gene_variant:-:-:-:-:-, Macma4_01_g11020:downstream_gene_variant:-:-:-:-:-
chr01	7817120	C	A	L2-1-1-1-1-3-2-1	DOM01,DOM02	2	Macma4_01_g11010:downstream_gene_variant:-:-:-:-:-, Macma4_01_g11020:upstream_gene_variant:-:-:-:-:-, Macma4_01_g11030:missense_variant:179:15:5:N/K:aaC/aaA
chr01	7818771	G	A	L2-1-1-1-1-1-2-4-1	ES-CN02	1	Macma4_01_g11020:upstream_gene_variant:-:-:-:-:-, Macma4_01_g11030:intron_variant:-:-:-:-:-
chr01	7820994	G	T	L2-1-2-1-1-1-1-1-1-1-1-1-2	KOR03,KOR04	2	Macma4_01_g11030:splice_polypyrimidine_tract_variant,intron_variant:-:-:-:-:-
chr01	7836512	CT	C	L1-2-1-2-2-2	PHL02,PHL05,PHL06	3	Macma4_01_g11040:downstream_gene_variant:-:-:-:-:-, Macma4_01_g11050:upstream_gene_variant:-:-:-:-:-
chr01	7841816	G	T	L1-2-2-2-2-2-1	CHN01	1	Macma4_01_g11050:downstream_gene_variant:-:-:-:-:-, Macma4_01_g11060:upstream_gene_variant:-:-:-:-:-
chr01	7841849	C	T	L1-2-2-2-2-2	CHN01,CHN02,CHN03,CHN04,CHN05,VNM10,TH-KOR01,TH-KOR02,TH-KOR03,TH-KOR04,TH-KOR05,TH-KOR06,TH-KOR07,TH-KOR08,VNM01,VNM03,VNM02,VNM05,VNM07	19	Macma4_01_g11050:downstream_gene_variant:-:-:-:-:-, Macma4_01_g11060:upstream_gene_variant:-:-:-:-:-
chr01	7856040	G	T	L2-1-2-1-1-1-1-1-1-2-2	PHL09	1	Macma4_01_g11060:downstream_gene_variant:-:-:-:-:-, Macma4_01_g11070:intron_variant:-:-:-:-:-, Macma4_01_g11080:downstream_gene_variant:-:-:-:-:-
chr01	7860653	C	T	L2-1-2-1-1-1-1-1-1-2-2	PHL09	1	Macma4_01_g11070:downstream_gene_variant:-:-:-:-:-, Macma4_01_g11080:missense_variant:560:475:159:E/K:Gag/Aag, Macma4_01_g11090:upstream_gene_variant:-:-:-:-:-
chr01	7864983	C	A	L1-2-2-2-2-2-1	CHN01	1	Macma4_01_g11080:upstream_gene_variant:-:-:-:-:-, Macma4_01_g11090:splice_region_variant,splice_polypyrimidine_tract_variant,intron_variant:-:-:-:-:-
chr01	7867018	G	A	L2-1-2-1-1-1-1-1-1-1-1-1-1-2	GLP01	1	Macma4_01_g11090:3_prime_UTR_variant:1785:-:-:-:-
chr01	7879556	G	A	L2-1-1-1-1-3-2-2-2-2-1	AUS02	1	Macma4_01_g11100:downstream_gene_variant:-:-:-:-:-, Macma4_01_g11110:upstream_gene_variant:-:-:-:-:-
chr01	7879594	A	G	L2-1-1-1-1-1-2-3-1	ES-CN03,ES-CN04	2	Macma4_01_g11100:downstream_gene_variant:-:-:-:-:-, Macma4_01_g11110:upstream_gene_variant:-:-:-:-:-
chr01	7882098	C	A	L1-2-2-2-2-2-2-2-2-2	VNM07	1	Macma4_01_g11110:5_prime_UTR_variant:76:-:-:-:-
chr01	7888811	A	G	L2-1-1-1-1-1-2-5-2-3-2-1	ES-CN05	1	Macma4_01_g11110:downstream_gene_variant:-:-:-:-:-, Macma4_01_g11120:5_prime_UTR_variant:256:-:-:-:-
chr01	7901906	G	T	L1-2-2-2-1	VNM04	1	Macma4_01_g11130:intron_variant:-:-:-:-:-
chr01	7902387	C	G	L2-1-2-1-1-1-1-1-1-1-1-2-2-1-1	GLP03	1	Macma4_01_g11130:intron_variant:-:-:-:-:-
chr01	7923212	A	G	L2-1-2-1-1-1-2-2	ES-CN30	1	Macma4_01_g11150:upstream_gene_variant:-:-:-:-:-, Macma4_01_g11160:upstream_gene_variant:-:-:-:-:-, Macma4_01_g11170:downstream_gene_variant:-:-:-:-:-, Macma4_01_g11180:3_prime_UTR_variant:2948:-:-:-:-
chr01	7943338	G	A	L2-1-1-1-2-2-1	CRI07	1	Macma4_01_g11210:synonymous_variant:458:432:144:I:atC/atT, Macma4_01_g11220:downstream_gene_variant:-:-:-:-:-
chr01	7943676	C	G	L2-1-1-1-1-3-2-2-2-2-3-2-2-2-1	CMR02	1	Macma4_01_g11210:missense_variant:338:312:104:L/F:ttG/ttC, Macma4_01_g11220:downstream_gene_variant:-:-:-:-:-
chr01	7945608	G	T	L2-1-1-1-1-3-2-2-1-2-1	NIC01	1	Macma4_01_g11210:upstream_gene_variant:-:-:-:-:-, Macma4_01_g11220:downstream_gene_variant:-:-:-:-:-, Macma4_01_g11230:upstream_gene_variant:-:-:-:-:-
chr01	7948079	A	C	L2-1-2-1-1-1-1-1-2	CRI02,CRI08	2	Macma4_01_g11210:upstream_gene_variant:-:-:-:-:-, Macma4_01_g11220:intron_variant:-:-:-:-:-, Macma4_01_g11230:upstream_gene_variant:-:-:-:-:-, Macma4_01_g11240:upstream_gene_variant:-:-:-:-:-
chr01	7951131	TCG	T	L2-1-2-1-1-1-1-1-1-1-1-1-1-1-1-1-2	COL07	1	Macma4_01_g11220:upstream_gene_variant:-:-:-:-:-, Macma4_01_g11230:downstream_gene_variant:-:-:-:-:-, Macma4_01_g11240:5_prime_UTR_variant:12-13:-:-:-:-
chr01	7959890	C	T	L1-2-2-2-2-2-2-1-1	VNM01	1	Macma4_01_g11240:downstream_gene_variant:-:-:-:-:-, Macma4_01_g11250:intron_variant:-:-:-:-:-
chr01	7961078	C	A	L2-1-1-1-1-2-2-1	COL03	1	Macma4_01_g11250:intron_variant:-:-:-:-:-
chr01	7963913	A	T	L1-2-2-2-2-2-2-1	VNM01,VNM03,VNM02	3	Macma4_01_g11250:synonymous_variant:1226:993:331:I:atA/atT, Macma4_01_g11260:downstream_gene_variant:-:-:-:-:-
chr01	7968074	TTCACTGTCAATCATAAAATAA	T	L2-1-1-1-1-3-2-2-2-2-3-2-1-1	DOM03	1	Macma4_01_g11250:downstream_gene_variant:-:-:-:-:-, Macma4_01_g11260:intron_variant:-:-:-:-:-
chr01	7976852	C	A	L2-1-1-1-1-3-2-1	DOM01,DOM02	2	Macma4_01_g11260:upstream_gene_variant:-:-:-:-:-, Macma4_01_g11270:downstream_gene_variant:-:-:-:-:-
chr01	7983486	G	T	L2-1-2-1-1-1-1-1-1-1-1-1-2-1	KOR04	1	Macma4_01_g11270:upstream_gene_variant:-:-:-:-:-, Macma4_01_g11280:upstream_gene_variant:-:-:-:-:-, Macma4_01_g11290:upstream_gene_variant:-:-:-:-:-
chr01	7984367	C	A	L2-1-2-1-1-1-1-1-1-1-1-2-2-1-1	GLP03	1	Macma4_01_g11270:upstream_gene_variant:-:-:-:-:-, Macma4_01_g11280:upstream_gene_variant:-:-:-:-:-, Macma4_01_g11290:upstream_gene_variant:-:-:-:-:-
chr01	7991354	G	A	L2-1-2-1-1-1-1-1-1-1-1-1-1-1-2	NIC02	1	Macma4_01_g11280:downstream_gene_variant:-:-:-:-:-, Macma4_01_g11290:intron_variant:-:-:-:-:-
chr01	8002019	G	GTCC	L2-1-2-1	ES-CN19,ES-CN25,ES-CN26,ES-CN27,ES-CN28,ES-CN29,ES-CN30,ES-CN31,ES-CN32,COL04,COL07,CRI01,CRI02,CRI03,CRI04,CRI05,CRI08,CRI09,CRI10,ECU02,ECU03,ECU06,ECU07,ECU09,GHA01,GHA02,GHA04,GTM01,GTM03,GLP01,GLP03,HND01,HND02,KOR03,KOR04,MEX02,NIC02,PAN01,PHL03,PHL04,PHL09	41	Macma4_01_g11300:upstream_gene_variant:-:-:-:-:-, Macma4_01_g11310:upstream_gene_variant:-:-:-:-:-, Macma4_01_g11320:upstream_gene_variant:-:-:-:-:-
chr01	8003832	T	G	L2-1-2-1-1-1-1-1-1-1-1-1-1-1-1-1-1-1-2	CRI09	1	Macma4_01_g11310:upstream_gene_variant:-:-:-:-:-, Macma4_01_g11320:upstream_gene_variant:-:-:-:-:-
chr01	8018173	G	A	L2-1-1-1-1-3-1	AUS09	1	Macma4_01_g11330:downstream_gene_variant:-:-:-:-:-, Macma4_01_g11340:intron_variant:-:-:-:-:-
chr01	8022773	G	T	L2-1-1-1-1-1-2-2-2	ES-CN14	1	Macma4_01_g11340:intron_variant:-:-:-:-:-
chr01	8026167	G	A	L2-1-2-1-1-1-1-1-1-1-1-2-2-2	COL04	1	Macma4_01_g11340:intron_variant:-:-:-:-:-, Macma4_01_g11350:downstream_gene_variant:-:-:-:-:-
chr01	8027180	G	C	L2-1-1-1-1-3-2-2	AUS01,AUS02,AUS03,AUS04,AUS05,AUS06,AUS07,AUS08,AUS10,CMR01,CMR02,ES-CN21,ES-CN22,COL05,DOM03,ECU01,ECU08,GHA03,KOR02,KOR05,NIC01,PHL07,PHL08	23	Macma4_01_g11340:3_prime_UTR_variant:2555:-:-:-:-, Macma4_01_g11350:downstream_gene_variant:-:-:-:-:-
chr01	8027181	C	A	L2-1-1-1-1-3-2-2	AUS01,AUS02,AUS03,AUS04,AUS05,AUS06,AUS07,AUS08,AUS10,CMR01,CMR02,ES-CN21,ES-CN22,COL05,DOM03,ECU01,ECU08,GHA03,KOR02,KOR05,NIC01,PHL07,PHL08	23	Macma4_01_g11340:3_prime_UTR_variant:2556:-:-:-:-, Macma4_01_g11350:downstream_gene_variant:-:-:-:-:-
chr01	8027503	A	G	L2-1-2-1-1-1-1-1-1-1-2-1-2	PHL03	1	Macma4_01_g11340:downstream_gene_variant:-:-:-:-:-, Macma4_01_g11350:downstream_gene_variant:-:-:-:-:-
chr01	8043120	G	T	L2-1-1-1-1-3-2-2-2-2-3-2-1	DOM03,KOR02,KOR05	3	Macma4_01_g11350:upstream_gene_variant:-:-:-:-:-, Macma4_01_g11360:downstream_gene_variant:-:-:-:-:-, Macma4_01_g11370:synonymous_variant:1560:1392:464:R:cgC/cgA
chr01	8046393	C	T	L2-2-2-1-1	UKN02	1	Macma4_01_g11360:downstream_gene_variant:-:-:-:-:-, Macma4_01_g11370:upstream_gene_variant:-:-:-:-:-
chr01	8047007	T	G	L1-2-2-2-2-2-2-1	VNM01,VNM03,VNM02	3	Macma4_01_g11360:downstream_gene_variant:-:-:-:-:-, Macma4_01_g11370:upstream_gene_variant:-:-:-:-:-
chr01	8047663	C	A	L2-1-1-1-1-3-2-2-2-2-2-2-2	AUS05	1	Macma4_01_g11360:downstream_gene_variant:-:-:-:-:-, Macma4_01_g11370:upstream_gene_variant:-:-:-:-:-
chr01	8049236	T	G	L2-1-2-1-1-1-1-1-1-1-1-1-2-1	KOR04	1	Macma4_01_g11370:upstream_gene_variant:-:-:-:-:-
chr01	8049302	C	T	L2-1-1-1-1-3-1	AUS09	1	Macma4_01_g11370:upstream_gene_variant:-:-:-:-:-
chr01	8054016	T	A	L2-1-1-1-1-3-2-2-2-2-2-2	AUS04,AUS05,AUS07,AUS08,AUS10	5	Macma4_01_g11380:upstream_gene_variant:-:-:-:-:-
chr01	8057347	G	T	L1-2-2-2-2-2-2-1-2-1	VNM03	1	Macma4_01_g11380:downstream_gene_variant:-:-:-:-:-
chr01	8058570	TG	T	L2-1-2-1-1-1-1-1-1-1-1-1-1-1-1-1-2	COL07	1	Macma4_01_g11380:downstream_gene_variant:-:-:-:-:-, Macma4_01_g11390:downstream_gene_variant:-:-:-:-:-
chr01	8067858	G	A	L1-2-2-2-1	VNM04	1	Macma4_01_g11390:upstream_gene_variant:-:-:-:-:-, Macma4_01_g11400:intron_variant:-:-:-:-:-
chr01	8068563	C	T	L2-2-2-1-1	UKN02	1	Macma4_01_g11400:intron_variant:-:-:-:-:-
chr01	8070071	G	A	L2-1-2-1-1-1-1-1-1-1-1-1-1-1-1-1-1-1	CRI09,CRI10	2	Macma4_01_g11400:intron_variant:-:-:-:-:-
chr01	8089564	T	TA	L2-1-2-1-1-1-1-1-1-1-2-1-1	PHL04	1	Macma4_01_g11410:downstream_gene_variant:-:-:-:-:-, Macma4_01_g11420:upstream_gene_variant:-:-:-:-:-
chr01	8103123	C	G	L2-1-2-1-1-1-1-1-1-1-1-1-1-1-2	NIC02	1	Macma4_01_g11430:downstream_gene_variant:-:-:-:-:-, Macma4_01_g11440:downstream_gene_variant:-:-:-:-:-, Macma4_01_g11450:upstream_gene_variant:-:-:-:-:-
chr01	8106559	G	A	L2-1-1-1-1-3-2-2-2-2-3-2-2-2-2-1	CMR01	1	Macma4_01_g11440:missense_variant:492:383:128:S/L:tCg/tTg, Macma4_01_g11450:upstream_gene_variant:-:-:-:-:-
chr01	8108219	G	T	L2-1-1-1-1-3-2-2-2-2-3-2-2-2-2-1	CMR01	1	Macma4_01_g11440:upstream_gene_variant:-:-:-:-:-, Macma4_01_g11450:missense_variant:352:352:118:D/Y:Gac/Tac, Macma4_01_g11460:upstream_gene_variant:-:-:-:-:-
chr01	8111179	T	C	L2-1-1-1-1-3-2-2-2-2-3-2-1-1	DOM03	1	Macma4_01_g11440:upstream_gene_variant:-:-:-:-:-, Macma4_01_g11450:downstream_gene_variant:-:-:-:-:-, Macma4_01_g11460:upstream_gene_variant:-:-:-:-:-
chr01	8112515	T	C	L1-2-2-2-2-1	VNM06	1	Macma4_01_g11450:downstream_gene_variant:-:-:-:-:-, Macma4_01_g11460:intron_variant:-:-:-:-:-
chr01	8112869	C	A	L2-1-2-1-1-1-1-1-1-1-1-2-1-1	ECU06,ECU07,ECU09	3	Macma4_01_g11450:downstream_gene_variant:-:-:-:-:-, Macma4_01_g11460:intron_variant:-:-:-:-:-
chr01	8119789	A	G	L2-1-1-1-1-3-2-2-2-2-2-1-2	AUS06	1	Macma4_01_g11460:downstream_gene_variant:-:-:-:-:-, Macma4_01_g11470:intron_variant:-:-:-:-:-, Macma4_01_g11480:downstream_gene_variant:-:-:-:-:-
chr01	8120398	C	T	L2-1-1-1-2	ES-CN17,ES-CN18,CRI07,ECU05	4	Macma4_01_g11460:downstream_gene_variant:-:-:-:-:-, Macma4_01_g11470:intron_variant:-:-:-:-:-, Macma4_01_g11480:downstream_gene_variant:-:-:-:-:-
chr01	8125061	G	T	L2-1-2-1-1-1-1-1-1-1-1-1-1-1-1-1-1-1-1	CRI10	1	Macma4_01_g11470:upstream_gene_variant:-:-:-:-:-, Macma4_01_g11480:stop_gained:608:608:203:S/*:tCa/tAa, Macma4_01_g11490:upstream_gene_variant:-:-:-:-:-
chr01	8126812	G	GCGACTT	L1-2-2-2-2-2-3-2-2-2-2-2	TH-KOR03,TH-KOR05	2	Macma4_01_g11480:intron_variant:-:-:-:-:-, Macma4_01_g11490:upstream_gene_variant:-:-:-:-:-, Macma4_01_g11500:downstream_gene_variant:-:-:-:-:-
chr01	8129142	A	G	L2-1-2-1-1-1-1-1-1-1-1-1-1-1-2	NIC02	1	Macma4_01_g11480:upstream_gene_variant:-:-:-:-:-, Macma4_01_g11490:upstream_gene_variant:-:-:-:-:-, Macma4_01_g11500:downstream_gene_variant:-:-:-:-:-
chr01	8129249	C	A	L1-2-1-2-2-2	PHL02,PHL05,PHL06	3	Macma4_01_g11480:upstream_gene_variant:-:-:-:-:-, Macma4_01_g11490:upstream_gene_variant:-:-:-:-:-, Macma4_01_g11500:downstream_gene_variant:-:-:-:-:-
chr01	8135442	C	A	L1-2-2-2-2-1	VNM06	1	Macma4_01_g11490:downstream_gene_variant:-:-:-:-:-, Macma4_01_g11500:intron_variant:-:-:-:-:-
chr01	8151169	G	T	L2-1-2-1-1-1-1-1-1-1-1-2-2-1-2	ES-CN19	1	Macma4_01_g11510:upstream_gene_variant:-:-:-:-:-, Macma4_01_g11520:missense_variant:1736:1671:557:L/F:ttG/ttT, Macma4_01_g11530:upstream_gene_variant:-:-:-:-:-
chr01	8152585	A	AT	L1-2-2-2-2-2-2-2-2-2	VNM07	1	Macma4_01_g11520:downstream_gene_variant:-:-:-:-:-, Macma4_01_g11530:upstream_gene_variant:-:-:-:-:-
chr01	8154605	C	G	L1-2-1-2-1	PHL10	1	Macma4_01_g11520:downstream_gene_variant:-:-:-:-:-, Macma4_01_g11530:synonymous_variant:502:429:143:A:gcC/gcG, Macma4_01_g11540:downstream_gene_variant:-:-:-:-:-
chr01	8161904	C	T	L1-2-1-2-1	PHL10	1	Macma4_01_g11540:upstream_gene_variant:-:-:-:-:-, Macma4_01_g11550:synonymous_variant:297:297:99:C:tgC/tgT
chr01	8162228	G	A	L2-1-1-1-1-3-2-2-2-2-2-2-3-1	AUS10	1	Macma4_01_g11540:upstream_gene_variant:-:-:-:-:-, Macma4_01_g11550:synonymous_variant:621:621:207:V:gtG/gtA
chr01	8169181	C	T	L1	CHN01,CHN02,CHN03,CHN04,CHN05,VNM10,TH-KOR01,TH-KOR02,TH-KOR03,TH-KOR04,TH-KOR05,TH-KOR06,TH-KOR07,TH-KOR08,PHL02,KOR01,KOR06,PHL01,PHL05,PHL06,PHL10,VNM01,VNM03,VNM02,VNM04,VNM05,VNM06,VNM07,VNM09	29	Macma4_01_g11560:synonymous_variant:981:222:74:Y:taC/taT, Macma4_01_g11570:downstream_gene_variant:-:-:-:-:-
chr01	8169850	C	G	L2-2-2-2-1	MEX01	1	Macma4_01_g11560:intron_variant:-:-:-:-:-, Macma4_01_g11570:downstream_gene_variant:-:-:-:-:-
chr01	8179493	C	T	L2-1-2-1-1-1-1-1-1-1-1-1-1-1-1-1-1-1-1	CRI10	1	Macma4_01_g11570:intron_variant:-:-:-:-:-, Macma4_01_g11580:downstream_gene_variant:-:-:-:-:-
chr01	8185071	CT	C	L2-1-1-1-1-3-2-2-2-2-3-2-1-2	KOR02,KOR05	2	Macma4_01_g11570:upstream_gene_variant:-:-:-:-:-, Macma4_01_g11580:upstream_gene_variant:-:-:-:-:-, Macma4_01_g11590:3_prime_UTR_variant:1306:-:-:-:-, Macma4_01_g11600:downstream_gene_variant:-:-:-:-:-
chr01	8205349	A	T	L1-2-2-2-1	VNM04	1	Macma4_01_g11600:missense_variant:7869:7636:2546:S/T:Tca/Aca
chr01	8209077	C	T	L1-2-1-2-2-2-2-2	PHL02	1	Macma4_01_g11600:intron_variant:-:-:-:-:-
chr01	8223261	G	C	L2-1-1-1-1-2-2-2	GLP02	1	Macma4_01_g11600:upstream_gene_variant:-:-:-:-:-, Macma4_01_g11610:intron_variant:-:-:-:-:-, Macma4_01_g11620:missense_variant:567:567:189:S/R:agC/agG
chr01	8229590	T	A	L2-1-1-1-1-3-2-2-1-1-1	ECU01	1	Macma4_01_g11610:intron_variant:-:-:-:-:-
chr01	8234729	C	T	L1-1	KOR06	1	Macma4_01_g11610:downstream_gene_variant:-:-:-:-:-, Macma4_01_g11630:downstream_gene_variant:-:-:-:-:-
chr01	8241218	C	G	L2-1-1-1-1-2-1	ES-CN20	1	Macma4_01_g11630:intron_variant:-:-:-:-:-
chr01	8242541	T	C	L1-2-2-2-2-2-3-2-2-1-1	TH-KOR01	1	Macma4_01_g11630:intron_variant:-:-:-:-:-
chr01	8245313	G	T	L1-2-2-2-2-2-3-2-1-1	VNM05	1	Macma4_01_g11630:intron_variant:-:-:-:-:-
chr01	8258432	A	G	L2-1-1-1-1-3-2-1-2	DOM02	1	Macma4_01_g11640:splice_donor_5th_base_variant,intron_variant:-:-:-:-:-, Macma4_01_g11650:upstream_gene_variant:-:-:-:-:-
chr01	8266982	T	G	L1-2-2-2-1	VNM04	1	Macma4_01_g11650:downstream_gene_variant:-:-:-:-:-, Macma4_01_g11660:upstream_gene_variant:-:-:-:-:-
chr01	8268404	G	A	L2-1-2-1-1-1-3-2	GHA01	1	Macma4_01_g11650:downstream_gene_variant:-:-:-:-:-, Macma4_01_g11660:5_prime_UTR_variant:377:-:-:-:-
chr01	8270080	T	A	L2-1-1-1-1-3-2-2-2-2-3-2-1-2	KOR02,KOR05	2	Macma4_01_g11660:intron_variant:-:-:-:-:-
chr01	8274610	G	A	L2-1-2-1-1-2-1	ES-CN28	1	Macma4_01_g11660:intron_variant:-:-:-:-:-
chr01	8279656	G	A	L2-1-1-1-1-3-2-2-2-2-3-2-2-2-1	CMR02	1	Macma4_01_g11660:downstream_gene_variant:-:-:-:-:-, Macma4_01_g11670:downstream_gene_variant:-:-:-:-:-
chr01	8281816	G	A	L2-1-1-1-1-1-2-3-1	ES-CN03,ES-CN04	2	Macma4_01_g11660:downstream_gene_variant:-:-:-:-:-, Macma4_01_g11670:synonymous_variant:1089:930:310:C:tgC/tgT, Macma4_01_g11680:downstream_gene_variant:-:-:-:-:-
chr01	8292066	GCCGACGTTCTCCGCCACGCGAT	G	L1-2-2-2-2-2-2-1-2	VNM03,VNM02	2	Macma4_01_g11680:frameshift_variant:151-172:8-29:3-10:DRVAENVG/X:gATCGCGTGGCGGAGAACGTCGGc/gc
chr01	8309340	G	T	L1-1	KOR06	1	Macma4_01_g11710:intron_variant:-:-:-:-:-
chr01	8315802	C	A	L2-1-2-1-1-1-1-1-1-1-1-2-1-1-1-2	ECU07	1	Macma4_01_g11710:intron_variant:-:-:-:-:-
chr01	8324972	C	A	L2-1-2-1-1-1-1-1-1-1-1-2-2-1	ES-CN19,GLP03	2	Macma4_01_g11710:downstream_gene_variant:-:-:-:-:-, Macma4_01_g11720:downstream_gene_variant:-:-:-:-:-, Macma4_01_g11730:missense_variant:152:25:9:A/S:Gcc/Tcc
chr01	8329423	C	T	L2-1-2-1-1-1-1-1-1-1-2-1-2	PHL03	1	Macma4_01_g11720:intron_variant:-:-:-:-:-, Macma4_01_g11730:upstream_gene_variant:-:-:-:-:-, Macma4_01_g11740:upstream_gene_variant:-:-:-:-:-
chr01	8341380	G	T	L2-1-2-1-1-1-1-1-1-1-1-1-1-1-1-1-1-2-1	CRI04	1	Macma4_01_g11740:downstream_gene_variant:-:-:-:-:-, Macma4_01_g11750:intron_variant:-:-:-:-:-
chr01	8343425	C	A	L2-1-2-1-1-1-1-1-1-1-1-2-1-1-1-2	ECU07	1	Macma4_01_g11750:intron_variant:-:-:-:-:-
chr01	8347464	GCCTATGAGGAAAAACAAGACAAATTATTATTGATT	G	L2-1-2-1-1-1-2-1-2	GTM03	1	Macma4_01_g11750:upstream_gene_variant:-:-:-:-:-
chr01	8347802	G	T	L2-1-2-1-1-1-1-1-1-1-1-1-1-1-1-1-2	COL07	1	Macma4_01_g11750:upstream_gene_variant:-:-:-:-:-, Macma4_01_g11760:downstream_gene_variant:-:-:-:-:-
chr01	8348105	G	A	L2-1-1-1-1-1-2-3-1	ES-CN03,ES-CN04	2	Macma4_01_g11750:upstream_gene_variant:-:-:-:-:-, Macma4_01_g11760:downstream_gene_variant:-:-:-:-:-, Macma4_01_g11770:upstream_gene_variant:-:-:-:-:-
chr01	8348106	A	T	L2-1-1-1-1-1-2-3-1	ES-CN03,ES-CN04	2	Macma4_01_g11750:upstream_gene_variant:-:-:-:-:-, Macma4_01_g11760:downstream_gene_variant:-:-:-:-:-, Macma4_01_g11770:upstream_gene_variant:-:-:-:-:-
chr01	8348204	T	A	L1-2-2-2-2-2-2-2-2-2	VNM07	1	Macma4_01_g11750:upstream_gene_variant:-:-:-:-:-, Macma4_01_g11760:downstream_gene_variant:-:-:-:-:-, Macma4_01_g11770:upstream_gene_variant:-:-:-:-:-
chr01	8354280	C	T	L1-2-2-2-2-2-3-2-1-1	VNM05	1	Macma4_01_g11760:upstream_gene_variant:-:-:-:-:-, Macma4_01_g11770:intron_variant:-:-:-:-:-, Macma4_01_g11780:downstream_gene_variant:-:-:-:-:-
chr01	8355180	C	A	L2-1-1-1-1-1-2-3-1	ES-CN03,ES-CN04	2	Macma4_01_g11760:upstream_gene_variant:-:-:-:-:-, Macma4_01_g11770:missense_variant:1386:999:333:F/L:ttC/ttA, Macma4_01_g11780:downstream_gene_variant:-:-:-:-:-
chr01	8356336	C	T	L2-1-1-1-1-2-1	ES-CN20	1	Macma4_01_g11760:upstream_gene_variant:-:-:-:-:-, Macma4_01_g11770:downstream_gene_variant:-:-:-:-:-, Macma4_01_g11780:downstream_gene_variant:-:-:-:-:-
chr01	8376309	A	T	L2-1-2-1-1-1-1-1-1-1-1-2-1-1-1-2	ECU07	1	Macma4_01_g11790:intron_variant:-:-:-:-:-, Macma4_01_g11800:downstream_gene_variant:-:-:-:-:-
chr01	8377366	T	C	L1-2-2-2-2-1	VNM06	1	Macma4_01_g11790:intron_variant:-:-:-:-:-, Macma4_01_g11800:downstream_gene_variant:-:-:-:-:-
chr01	8384897	A	T	L2-1-2-1-1-1-1-1-1-2-1	PAN01	1	Macma4_01_g11790:downstream_gene_variant:-:-:-:-:-, Macma4_01_g11800:upstream_gene_variant:-:-:-:-:-
chr01	8388966	G	A	L2-1-2-1-1-1-1-1-1-1-1-1-1-1-1-2-2-1	ES-CN31	1	Macma4_01_g11800:upstream_gene_variant:-:-:-:-:-, Macma4_01_g11810:downstream_gene_variant:-:-:-:-:-
chr01	8389948	G	T	L2-1-2-1-1-1-1-1-1-1-2-1-1	PHL04	1	Macma4_01_g11810:downstream_gene_variant:-:-:-:-:-
chr01	8397256	G	T	L1-2-2-2-2-2-3-1-1	CHN03	1	Macma4_01_g11810:upstream_gene_variant:-:-:-:-:-, Macma4_01_g11820:downstream_gene_variant:-:-:-:-:-
chr01	8406381	A	G	L2-1-1-1-1-3-2-2-2-2-3-2-2-2-1	CMR02	1	Macma4_01_g11820:upstream_gene_variant:-:-:-:-:-, Macma4_01_g11830:intron_variant:-:-:-:-:-, Macma4_01_g11840:upstream_gene_variant:-:-:-:-:-
chr01	8411891	C	A	L1-2-2-2-2-2-3-1-1	CHN03	1	Macma4_01_g11830:downstream_gene_variant:-:-:-:-:-, Macma4_01_g11840:intron_variant:-:-:-:-:-, Macma4_01_g11850:upstream_gene_variant:-:-:-:-:-
chr01	8421487	T	C	L1-2-2-2-2-2-2-1	VNM01,VNM03,VNM02	3	Macma4_01_g11850:downstream_gene_variant:-:-:-:-:-, Macma4_01_g11860:intron_variant:-:-:-:-:-
chr01	8421864	T	G	L2-1-1-1-1-2-2-1	COL03	1	Macma4_01_g11850:downstream_gene_variant:-:-:-:-:-, Macma4_01_g11860:missense_variant:1425:902:301:Y/S:tAc/tCc
chr01	8424480	C	A	L2-1-2-1-1-1-1-1-1-1-1-2-1-1	ECU06,ECU07,ECU09	3	Macma4_01_g11860:intron_variant:-:-:-:-:-
chr01	8428645	G	T	L2-2-1-2	COL02	1	Macma4_01_g11860:upstream_gene_variant:-:-:-:-:-, Macma4_01_g11870:downstream_gene_variant:-:-:-:-:-
chr01	8439552	T	A	L1-2-2-2-2-2-3-2-2-1-1	TH-KOR01	1	Macma4_01_g11880:upstream_gene_variant:-:-:-:-:-
chr01	8440828	C	A	L1-2-1-2-2-2-1	PHL05	1	Macma4_01_g11880:upstream_gene_variant:-:-:-:-:-
chr01	8461894	C	T	L2-1-2-1-1-1-1-1-1-1-1-1-1-1-1-2-1-1	ES-CN26	1	Macma4_01_g11890:downstream_gene_variant:-:-:-:-:-, Macma4_01_g11900:upstream_gene_variant:-:-:-:-:-
chr01	8463242	C	A	L2-1-2-1-1-1-1-1-1-2-1	PAN01	1	Macma4_01_g11890:downstream_gene_variant:-:-:-:-:-, Macma4_01_g11900:upstream_gene_variant:-:-:-:-:-
chr01	8470296	G	T	L1-2-1-2-2-2-1	PHL05	1	Macma4_01_g11900:missense_variant:773:773:258:R/I:aGa/aTa
chr01	8470479	G	A	L2-1-2-1-1-1-1-1-1-1-1-2-1-3	HND02	1	Macma4_01_g11900:intron_variant:-:-:-:-:-
chr01	8472528	C	A	L1-2-2-2-2-2-2-2-2-1	CHN05	1	Macma4_01_g11900:intron_variant:-:-:-:-:-
chr01	8477801	AGCATCTGAATCTACCGAATGATT	A	L2-2-2-2-1	MEX01	1	Macma4_01_g11900:splice_region_variant,splice_polypyrimidine_tract_variant,intron_variant:-:-:-:-:-, Macma4_01_g11910:downstream_gene_variant:-:-:-:-:-
chr01	8483527	C	A	L2-1-1-1-2-1-2	ES-CN17	1	Macma4_01_g11900:synonymous_variant:3942:3942:1314:I:atC/atA, Macma4_01_g11910:upstream_gene_variant:-:-:-:-:-
chr01	8484267	G	A	L2-1-2-1-1-1-1-1-1-1-1-2-1-3	HND02	1	Macma4_01_g11900:missense_variant:4364:4364:1455:R/K:aGa/aAa, Macma4_01_g11910:upstream_gene_variant:-:-:-:-:-
chr01	8486029	G	A	L2-1-1-1-1-3-2-2-2-1	PHL08	1	Macma4_01_g11900:downstream_gene_variant:-:-:-:-:-
chr01	8487408	G	A	L2-1-2-2-1-2-2	PER02	1	Macma4_01_g11900:downstream_gene_variant:-:-:-:-:-
chr01	8491455	C	T	L2-1-1-1-1-3-2-2-2-2-3-2-2	CMR01,CMR02,ECU08,GHA03	4
chr01	8493701	G	A	L2-1-1-1-1-3-2-2-2-2-3-2-2-1	ECU08	1	Macma4_01_g11920:upstream_gene_variant:-:-:-:-:-
chr01	8494032	A	T	L2-1-2-1-1-1-1-1-1-1-2-2	CRI01	1	Macma4_01_g11920:upstream_gene_variant:-:-:-:-:-
chr01	8494533	C	G	L2-1-1-1-2-1-2	ES-CN17	1	Macma4_01_g11920:upstream_gene_variant:-:-:-:-:-
chr01	8501209	G	A	L1-2-2-2-2-2-3-2-2	TH-KOR01,TH-KOR02,TH-KOR03,TH-KOR04,TH-KOR05,TH-KOR06,TH-KOR07,TH-KOR08	8	Macma4_01_g11920:intron_variant:-:-:-:-:-
chr01	8503374	T	C	L2-1-1-1-1-3-2-2-1-2-2-2	ES-CN22	1	Macma4_01_g11920:intron_variant:-:-:-:-:-
chr01	8504670	G	A	L1-2-2-2-1	VNM04	1	Macma4_01_g11920:intron_variant:-:-:-:-:-
chr01	8512500	G	A	L2-2-2-1-1	UKN02	1	Macma4_01_g11920:intron_variant:-:-:-:-:-
chr01	8513670	T	C	L1-2-2-2-2-2-1	CHN01	1	Macma4_01_g11920:downstream_gene_variant:-:-:-:-:-
chr01	8515377	C	A	L2-1-1-1-2-1-2	ES-CN17	1	Macma4_01_g11920:downstream_gene_variant:-:-:-:-:-
chr01	8516619	C	T	L2-1-2-1-1-1-1-1-1-1-1-1-1-1-1-1-1-2	CRI03,CRI04	2	Macma4_01_g11920:downstream_gene_variant:-:-:-:-:-
chr01	8519266	C	A	L1-2-2-2-2-2-3-2-2-2-1	TH-KOR06,TH-KOR08	2	Macma4_01_g11930:upstream_gene_variant:-:-:-:-:-
chr01	8538777	A	T	L2-1-2-1-2	GTM01	1	Macma4_01_g11940:upstream_gene_variant:-:-:-:-:-, Macma4_01_g11950:upstream_gene_variant:-:-:-:-:-, Macma4_01_g11960:downstream_gene_variant:-:-:-:-:-
chr01	8541628	C	A	L2-1-1-1-2-2-2	ECU05	1	Macma4_01_g11940:upstream_gene_variant:-:-:-:-:-, Macma4_01_g11950:synonymous_variant:78:78:26:I:atC/atA, Macma4_01_g11960:downstream_gene_variant:-:-:-:-:-
chr01	8551581	G	T	L1-2-1-2-1	PHL10	1	Macma4_01_g11960:upstream_gene_variant:-:-:-:-:-, Macma4_01_g11970:missense_variant:152:47:16:R/L:cGt/cTt
chr01	8551887	C	T	L2-1-1-1-1-1-2-4-2-2	ES-CN11,ES-CN12	2	Macma4_01_g11960:upstream_gene_variant:-:-:-:-:-, Macma4_01_g11970:missense_variant:458:353:118:A/V:gCg/gTg
chr01	8551894	C	T	L2-1-2-2-1-1-3	PER06	1	Macma4_01_g11960:upstream_gene_variant:-:-:-:-:-, Macma4_01_g11970:synonymous_variant:465:360:120:S:tcC/tcT
chr01	8552400	G	A	L2-1-1-1-1-3-2-2-1-2-2-1	ES-CN21	1	Macma4_01_g11960:upstream_gene_variant:-:-:-:-:-, Macma4_01_g11970:missense_variant:971:866:289:R/K:aGa/aAa
chr01	8561144	G	A	L2-1-1-1-1-1-2-1	ES-CN16	1	Macma4_01_g11980:missense_variant:166:8:3:S/N:aGc/aAc, Macma4_01_g11990:upstream_gene_variant:-:-:-:-:-
chr01	8563044	A	T	L2-1-2-1-1-1-1-1-1-1-1-1-1-1-1-2-2-2	CRI05	1	Macma4_01_g11980:intron_variant:-:-:-:-:-, Macma4_01_g11990:upstream_gene_variant:-:-:-:-:-
chr01	8566483	C	A	L2-1-1-1-1-3-2-2-2-2-3-2-2-2-1	CMR02	1	Macma4_01_g11980:downstream_gene_variant:-:-:-:-:-, Macma4_01_g11990:intron_variant:-:-:-:-:-
chr01	8572779	G	T	L1-2-2-2-2-2-3-1-2	CHN04	1	Macma4_01_g11990:downstream_gene_variant:-:-:-:-:-, Macma4_01_g12000:downstream_gene_variant:-:-:-:-:-
chr01	8573597	T	C	L2-1-1-1-1-2-2-1	COL03	1	Macma4_01_g11990:downstream_gene_variant:-:-:-:-:-, Macma4_01_g12000:downstream_gene_variant:-:-:-:-:-
chr01	8573769	G	A	L1-2-1-2-1	PHL10	1	Macma4_01_g11990:downstream_gene_variant:-:-:-:-:-, Macma4_01_g12000:downstream_gene_variant:-:-:-:-:-
chr01	8580332	C	T	L2-1-2-1-1-1-1-1-1-1-1-2-2-1-2	ES-CN19	1	Macma4_01_g12000:intron_variant:-:-:-:-:-, Macma4_01_g12010:upstream_gene_variant:-:-:-:-:-
chr01	8583592	G	A	L2-1-2-1-1-1-1-1-1-1-1-2-1-1-1	ECU07,ECU09	2	Macma4_01_g12000:upstream_gene_variant:-:-:-:-:-, Macma4_01_g12010:upstream_gene_variant:-:-:-:-:-, Macma4_01_g12020:downstream_gene_variant:-:-:-:-:-
chr01	8588580	T	C	L2-1-1-1-1-3-2-2-1-2-2-1	ES-CN21	1	Macma4_01_g12010:downstream_gene_variant:-:-:-:-:-, Macma4_01_g12020:intron_variant:-:-:-:-:-, Macma4_01_g12030:downstream_gene_variant:-:-:-:-:-
chr01	8589893	A	C	L1-2-2-2-2-2-3-2-2-2-1-2	TH-KOR08	1	Macma4_01_g12010:downstream_gene_variant:-:-:-:-:-, Macma4_01_g12020:upstream_gene_variant:-:-:-:-:-, Macma4_01_g12030:downstream_gene_variant:-:-:-:-:-
chr01	8600788	C	T	L2-1-1-1-1-3-2-2-1-1-2-2	AUS03	1	Macma4_01_g12040:upstream_gene_variant:-:-:-:-:-, Macma4_01_g12050:intron_variant:-:-:-:-:-
chr01	8601206	G	A	L2-1-2-1-1-1-1-1-1-1-1-1-1-1-1-2-1-2	ES-CN25	1	Macma4_01_g12040:upstream_gene_variant:-:-:-:-:-, Macma4_01_g12050:missense_variant:828:599:200:A/V:gCc/gTc
chr01	8601789	G	T	L2-1-2-1-1-1-1-1-1-1-1-1-1-1-1-2-1	ES-CN25,ES-CN26	2	Macma4_01_g12040:upstream_gene_variant:-:-:-:-:-, Macma4_01_g12050:synonymous_variant:340:111:37:V:gtC/gtA
chr01	8606429	TGCATATTCCATACCATACTGTGGGTTAAGAAAGAA	T	L1-2-1-2-2-2-1	PHL05	1	Macma4_01_g12050:upstream_gene_variant:-:-:-:-:-, Macma4_01_g12060:downstream_gene_variant:-:-:-:-:-, Macma4_01_g12070:downstream_gene_variant:-:-:-:-:-
chr01	8609939	G	C	L2-1-2-1-1-1-1-1-2-1	CRI08	1	Macma4_01_g12060:upstream_gene_variant:-:-:-:-:-, Macma4_01_g12070:missense_variant:338:338:113:P/R:cCg/cGg
chr01	8611070	T	A	L2-1-2-1-1-1-1-1-1-2-2	PHL09	1	Macma4_01_g12060:upstream_gene_variant:-:-:-:-:-, Macma4_01_g12070:upstream_gene_variant:-:-:-:-:-
chr01	8611071	T	A	L2-1-2-1-1-1-1-1-1-2-2	PHL09	1	Macma4_01_g12060:upstream_gene_variant:-:-:-:-:-, Macma4_01_g12070:upstream_gene_variant:-:-:-:-:-
chr01	8612347	G	A	L1-2-2-2-2-2-3-2-2-2-2-2	TH-KOR03,TH-KOR05	2	Macma4_01_g12060:upstream_gene_variant:-:-:-:-:-, Macma4_01_g12070:upstream_gene_variant:-:-:-:-:-, Macma4_01_g12080:upstream_gene_variant:-:-:-:-:-
chr01	8612348	C	A	L1-2-2-2-2-2-3-2-2-2-2-2	TH-KOR03,TH-KOR05	2	Macma4_01_g12060:upstream_gene_variant:-:-:-:-:-, Macma4_01_g12070:upstream_gene_variant:-:-:-:-:-, Macma4_01_g12080:upstream_gene_variant:-:-:-:-:-
chr01	8614560	G	C	L2-1-1-1-1-1-2-5-2-2-2	ES-CN24	1	Macma4_01_g12070:upstream_gene_variant:-:-:-:-:-, Macma4_01_g12080:upstream_gene_variant:-:-:-:-:-
chr01	8614684	T	C	L1-2-2-2-2-2-2-2-2-1	CHN05	1	Macma4_01_g12070:upstream_gene_variant:-:-:-:-:-, Macma4_01_g12080:upstream_gene_variant:-:-:-:-:-
chr01	8614765	T	C	L2-1-2-1-2	GTM01	1	Macma4_01_g12070:upstream_gene_variant:-:-:-:-:-, Macma4_01_g12080:upstream_gene_variant:-:-:-:-:-
chr01	8615769	A	T	L1-2-2-2-2-2-3-2-2-1-1	TH-KOR01	1	Macma4_01_g12080:upstream_gene_variant:-:-:-:-:-
chr01	8621940	C	G	L2-1-1-1-1-3-2-2-2-2-3-1	COL05	1	Macma4_01_g12080:downstream_gene_variant:-:-:-:-:-, Macma4_01_g12090:missense_variant:747:696:232:S/R:agC/agG, Macma4_01_g12100:downstream_gene_variant:-:-:-:-:-
chr01	8621984	C	T	L2-1-1-1-1-3-2-2-2-2-3-1	COL05	1	Macma4_01_g12080:downstream_gene_variant:-:-:-:-:-, Macma4_01_g12090:missense_variant:791:740:247:S/L:tCg/tTg, Macma4_01_g12100:downstream_gene_variant:-:-:-:-:-
chr01	8626895	G	T	L2-2-2-1-1	UKN02	1	Macma4_01_g12090:downstream_gene_variant:-:-:-:-:-, Macma4_01_g12100:missense_variant:465:407:136:P/Q:cCg/cAg, Macma4_01_g12110:downstream_gene_variant:-:-:-:-:-
chr01	8638010	G	A	L2-1-1-1-1-3-2-2-2-2-3-2-1-2	KOR02,KOR05	2	Macma4_01_g12120:missense_variant:292:125:42:P/L:cCg/cTg, Macma4_01_g12130:upstream_gene_variant:-:-:-:-:-
chr01	8640579	C	T	L1-2-2-2-2-2-2-2-2-1	CHN05	1	Macma4_01_g12120:upstream_gene_variant:-:-:-:-:-, Macma4_01_g12130:upstream_gene_variant:-:-:-:-:-
chr01	8648436	G	T	L2-1-1-1-1-3-2-2-2-2-3-2-1-2	KOR02,KOR05	2	Macma4_01_g12130:intron_variant:-:-:-:-:-
chr01	8652855	C	T	L2-1-1-1-1-2-2	COL03,GLP02	2	Macma4_01_g12130:downstream_gene_variant:-:-:-:-:-, Macma4_01_g12140:downstream_gene_variant:-:-:-:-:-
chr01	8674321	A	G	L2-1-2-1-1-1-1-1-1-1-1-1-1-1-1-1-1-1-2	CRI09	1	Macma4_01_g12170:missense_variant:511:511:171:S/P:Tcg/Ccg
chr01	8677567	C	T	L2-1-2-1-1-1-1-1-2	CRI02,CRI08	2	Macma4_01_g12160:downstream_gene_variant:-:-:-:-:-, Macma4_01_g12170:upstream_gene_variant:-:-:-:-:-
chr01	8686497	C	T	L2-1-2-1-1-1-1-1-1-1-1-1-2-1	KOR04	1	Macma4_01_g12160:synonymous_variant:1614:1233:411:V:gtG/gtA
chr01	8687187	A	G	L1-2-2-2-2-2-3-1-1	CHN03	1	Macma4_01_g12160:missense_variant:989:608:203:I/T:aTa/aCa
chr01	8693999	G	T	L1-2-2-2-2-2-2-1	VNM01,VNM03,VNM02	3	Macma4_01_g12180:upstream_gene_variant:-:-:-:-:-
chr01	8694468	T	A	L1-2-2-2-2-2-3-2-1-1	VNM05	1	Macma4_01_g12180:upstream_gene_variant:-:-:-:-:-
chr01	8695831	G	T	L2-1-2-1-1-1-1-1-1-1-2-2	CRI01	1	Macma4_01_g12180:intron_variant:-:-:-:-:-
chr01	8695971	G	C	L2-1-2-1-1-1-2-1-2	GTM03	1	Macma4_01_g12180:intron_variant:-:-:-:-:-
chr01	8711006	T	A	L2-1-2-1-1-1-2-1-2	GTM03	1	Macma4_01_g12180:downstream_gene_variant:-:-:-:-:-, Macma4_01_g12190:intron_variant:-:-:-:-:-
chr01	8713528	T	A	L2-2-1-1-2	CRI06	1	Macma4_01_g12190:intron_variant:-:-:-:-:-
chr01	8714469	C	T	L2-2-2-2-1	MEX01	1	Macma4_01_g12190:missense_variant:2381:2257:753:A/T:Gct/Act
chr01	8718084	G	A	L2-2-1-1-1-1-2	ECU04	1	Macma4_01_g12190:intron_variant:-:-:-:-:-
chr01	8720682	C	T	L2-1-2-1-1-1-1-1-1-1-1-1-2	KOR03,KOR04	2	Macma4_01_g12190:missense_variant:1017:893:298:S/N:aGt/aAt
chr01	8721270	A	G	L1-2-1-2-1	PHL10	1	Macma4_01_g12190:missense_variant:792:668:223:M/T:aTg/aCg
chr01	8726021	C	A	L1-2-2-2-2-2-3-2-2-1-2	TH-KOR02,TH-KOR04	2	Macma4_01_g12190:upstream_gene_variant:-:-:-:-:-, Macma4_01_g12200:downstream_gene_variant:-:-:-:-:-
chr01	8726084	C	T	L1-2-1-2-1	PHL10	1	Macma4_01_g12190:upstream_gene_variant:-:-:-:-:-, Macma4_01_g12200:downstream_gene_variant:-:-:-:-:-
chr01	8731164	C	T	L2-1-2-1-1-1-1-1-1-1-1-1-1-1-1-2-1-2	ES-CN25	1	Macma4_01_g12200:intron_variant:-:-:-:-:-, Macma4_01_g12210:upstream_gene_variant:-:-:-:-:-
chr01	8732363	A	C	L2-1-1-1-1-3-2-2-2-2-3	CMR01,CMR02,COL05,DOM03,ECU08,GHA03,KOR02,KOR05	8	Macma4_01_g12200:upstream_gene_variant:-:-:-:-:-, Macma4_01_g12210:upstream_gene_variant:-:-:-:-:-, Macma4_01_g12220:upstream_gene_variant:-:-:-:-:-
chr01	8732551	C	T	L2-1-1-1-1-2-2-1	COL03	1	Macma4_01_g12200:upstream_gene_variant:-:-:-:-:-, Macma4_01_g12210:upstream_gene_variant:-:-:-:-:-, Macma4_01_g12220:upstream_gene_variant:-:-:-:-:-
chr01	8734812	C	T	L2-1-1-1-1-3-1	AUS09	1	Macma4_01_g12200:upstream_gene_variant:-:-:-:-:-, Macma4_01_g12210:intron_variant:-:-:-:-:-, Macma4_01_g12220:upstream_gene_variant:-:-:-:-:-
chr01	8740119	GA	G	L2-1-2-1-1-1-1-1-1-1-1-2-1-1-1-1	ECU09	1	Macma4_01_g12210:downstream_gene_variant:-:-:-:-:-, Macma4_01_g12220:intron_variant:-:-:-:-:-
chr01	8742306	G	T	L1-2-2-2-2-2-3-2-2-2-2-1	TH-KOR07	1	Macma4_01_g12220:stop_gained:2686:2296:766:G/*:Gga/Tga
chr01	8744324	C	T	L2-1-1-1-1-3-2-2-1-2-2	ES-CN21,ES-CN22	2	Macma4_01_g12220:intron_variant:-:-:-:-:-
chr01	8746384	C	T	L2-1-1-1-1-2-1	ES-CN20	1	Macma4_01_g12220:missense_variant:4265:3875:1292:A/V:gCa/gTa, Macma4_01_g12230:downstream_gene_variant:-:-:-:-:-
chr01	8750523	CG	C	L2-1-2-1-1-1-1-1-1-1-1-1-1-1-1-2-1	ES-CN25,ES-CN26	2	Macma4_01_g12220:downstream_gene_variant:-:-:-:-:-, Macma4_01_g12230:downstream_gene_variant:-:-:-:-:-, Macma4_01_g12240:downstream_gene_variant:-:-:-:-:-
chr01	8752592	G	T	L1-2-2-2-2-2-3-2-2-1-1	TH-KOR01	1	Macma4_01_g12220:downstream_gene_variant:-:-:-:-:-, Macma4_01_g12230:upstream_gene_variant:-:-:-:-:-, Macma4_01_g12240:missense_variant:5018:4514:1505:P/H:cCt/cAt
chr01	8752839	T	C	L2-1-2-1-1-1-1-1-2-2	CRI02	1	Macma4_01_g12230:upstream_gene_variant:-:-:-:-:-, Macma4_01_g12240:missense_variant:4771:4267:1423:T/A:Act/Gct
chr01	8760398	A	G	L2-1-1-1-1-1-2-5-2-1	ES-CN06	1	Macma4_01_g12240:intron_variant:-:-:-:-:-
chr01	8764771	A	G	L2-1-2-1-1-1-1-1-1-2-1	PAN01	1	Macma4_01_g12240:intron_variant:-:-:-:-:-
chr01	8770692	C	A	L1-2-2	CHN01,CHN02,CHN03,CHN04,CHN05,VNM10,TH-KOR01,TH-KOR02,TH-KOR03,TH-KOR04,TH-KOR05,TH-KOR06,TH-KOR07,TH-KOR08,PHL01,VNM01,VNM03,VNM02,VNM04,VNM05,VNM06,VNM07	22	Macma4_01_g12240:upstream_gene_variant:-:-:-:-:-
chr01	8771114	G	A	L2-1-2-1-1-1-1-1-1-1-1-1-1-1-1-3	ECU02,ECU03	2	Macma4_01_g12240:upstream_gene_variant:-:-:-:-:-
chr01	8772985	A	C	L2-1-2-2-2	PER01	1	Macma4_01_g12240:upstream_gene_variant:-:-:-:-:-, Macma4_01_g12250:upstream_gene_variant:-:-:-:-:-
chr01	8778532	C	A	L2-1-2-1-1-1-1-1-1-1-2-1-2	PHL03	1	Macma4_01_g12250:intron_variant:-:-:-:-:-, Macma4_01_g12260:upstream_gene_variant:-:-:-:-:-
chr01	8787711	A	C	L1-2-1-1	KOR01	1	Macma4_01_g12260:downstream_gene_variant:-:-:-:-:-, Macma4_01_g12270:upstream_gene_variant:-:-:-:-:-
chr01	8791307	G	T	L2-1-2-1-1-1-1-1-1-1-1-1-1-1-1-2-1-1	ES-CN26	1	Macma4_01_g12260:downstream_gene_variant:-:-:-:-:-, Macma4_01_g12270:splice_region_variant,intron_variant:-:-:-:-:-
chr01	8797117	C	G	L2-1-2-1-1-1-1-1-1-2-2	PHL09	1	Macma4_01_g12270:downstream_gene_variant:-:-:-:-:-, Macma4_01_g12280:downstream_gene_variant:-:-:-:-:-, Macma4_01_g12290:downstream_gene_variant:-:-:-:-:-
chr01	8798186	A	C	L1-2-2-2-2-2-3-1-1	CHN03	1	Macma4_01_g12270:downstream_gene_variant:-:-:-:-:-, Macma4_01_g12280:missense_variant:214:203:68:M/R:aTg/aGg, Macma4_01_g12290:downstream_gene_variant:-:-:-:-:-
chr01	8800660	G	A	L2-1-2-1-1-1-1-1-1-1-1-1-2-2	KOR03	1	Macma4_01_g12270:downstream_gene_variant:-:-:-:-:-, Macma4_01_g12280:upstream_gene_variant:-:-:-:-:-, Macma4_01_g12290:intron_variant:-:-:-:-:-
chr01	8803732	C	A	L2-1-2-1-1-1-1-1-1-1-1-1-2-1	KOR04	1	Macma4_01_g12280:upstream_gene_variant:-:-:-:-:-, Macma4_01_g12290:intron_variant:-:-:-:-:-, Macma4_01_g12300:upstream_gene_variant:-:-:-:-:-
chr01	8810367	T	A	L2-1-2-1-1-1-1-1-1-1-1-1-1-1-2	NIC02	1	Macma4_01_g12300:downstream_gene_variant:-:-:-:-:-, Macma4_01_g12310:upstream_gene_variant:-:-:-:-:-
chr01	8828002	A	G	L2-1-1-1-1-3-2-2-2-2-3-2-2-2-2-2	GHA03	1	Macma4_01_g12310:downstream_gene_variant:-:-:-:-:-, Macma4_01_g12320:upstream_gene_variant:-:-:-:-:-
chr01	8832950	A	AG	L2-1-1-1-1-2-1	ES-CN20	1	Macma4_01_g12320:intron_variant:-:-:-:-:-, Macma4_01_g12330:upstream_gene_variant:-:-:-:-:-
chr01	8849504	C	A	L2-1-2-1-1-1-1-1-1-1-1-1-1-1-1-2-2-2	CRI05	1	Macma4_01_g12340:downstream_gene_variant:-:-:-:-:-, Macma4_01_g12350:intron_variant:-:-:-:-:-
chr01	8851399	G	A	L2-1-2-1-1-1-1-1-1-1-1-2-1	ECU06,ECU07,ECU09,GHA04,HND02	5	Macma4_01_g12340:downstream_gene_variant:-:-:-:-:-, Macma4_01_g12350:intron_variant:-:-:-:-:-, Macma4_01_g12360:downstream_gene_variant:-:-:-:-:-
chr01	8855536	T	G	L2-1-2-1-1-1-3	GHA01,GHA02	2	Macma4_01_g12350:upstream_gene_variant:-:-:-:-:-, Macma4_01_g12360:synonymous_variant:856:856:286:R:Aga/Cga
chr01	8856187	C	G	L2-1-1-1-1-1-2-5-1	ES-CN01	1	Macma4_01_g12350:upstream_gene_variant:-:-:-:-:-, Macma4_01_g12360:missense_variant:349:349:117:A/P:Gcg/Ccg, Macma4_01_g12370:downstream_gene_variant:-:-:-:-:-
chr01	8859563	T	A	L1-2-2-2-2-2-2-2-2-1	CHN05	1	Macma4_01_g12360:upstream_gene_variant:-:-:-:-:-, Macma4_01_g12370:downstream_gene_variant:-:-:-:-:-
chr01	8860414	G	A	L2-1-2-1-1-1-1-1-1-2-1	PAN01	1	Macma4_01_g12360:upstream_gene_variant:-:-:-:-:-, Macma4_01_g12370:downstream_gene_variant:-:-:-:-:-, Macma4_01_g12380:downstream_gene_variant:-:-:-:-:-
chr01	8861176	T	C	L2-1-2-1-1-1-1-1-1-2-1	PAN01	1	Macma4_01_g12360:upstream_gene_variant:-:-:-:-:-, Macma4_01_g12370:downstream_gene_variant:-:-:-:-:-, Macma4_01_g12380:downstream_gene_variant:-:-:-:-:-
chr01	8862713	C	T	L2-1-1-1-1-3-2-2-2-2-2-1-2	AUS06	1	Macma4_01_g12370:upstream_gene_variant:-:-:-:-:-, Macma4_01_g12380:downstream_gene_variant:-:-:-:-:-
chr01	8865128	C	T	L2-1-2-1-1-1-1-1-1-1-1-1-2	KOR03,KOR04	2	Macma4_01_g12370:upstream_gene_variant:-:-:-:-:-, Macma4_01_g12380:downstream_gene_variant:-:-:-:-:-, Macma4_01_g12390:downstream_gene_variant:-:-:-:-:-
chr01	8867096	G	A	L1-2-1-2-1	PHL10	1	Macma4_01_g12380:missense_variant:169:169:57:L/F:Ctc/Ttc, Macma4_01_g12390:downstream_gene_variant:-:-:-:-:-, Macma4_01_g12400:downstream_gene_variant:-:-:-:-:-
chr01	8867785	G	A	L2-1-1-1-1-1-2-1	ES-CN16	1	Macma4_01_g12380:upstream_gene_variant:-:-:-:-:-, Macma4_01_g12390:downstream_gene_variant:-:-:-:-:-, Macma4_01_g12400:downstream_gene_variant:-:-:-:-:-
chr01	8868034	G	A	L1-2-2-2-2-2-3-2-1-1	VNM05	1	Macma4_01_g12380:upstream_gene_variant:-:-:-:-:-, Macma4_01_g12390:downstream_gene_variant:-:-:-:-:-, Macma4_01_g12400:downstream_gene_variant:-:-:-:-:-
chr01	8870755	A	G	L1-2-1-2-2-1	VNM09	1	Macma4_01_g12380:upstream_gene_variant:-:-:-:-:-, Macma4_01_g12390:upstream_gene_variant:-:-:-:-:-, Macma4_01_g12400:downstream_gene_variant:-:-:-:-:-, Macma4_01_g12410:downstream_gene_variant:-:-:-:-:-
chr01	8878990	A	C	L2-1-2-1-1-1-1-1-1-1-1-1-1-1-1-1-1-1-1	CRI10	1	Macma4_01_g12410:upstream_gene_variant:-:-:-:-:-
chr01	8878999	G	A	L2-1-2-1-1-1-1-1-1-1-1-1-1-1-1-2-1-1	ES-CN26	1	Macma4_01_g12410:upstream_gene_variant:-:-:-:-:-
chr01	8880049	A	T	L2-1-1-1-1-3-2-2-2-2-2-2-2	AUS05	1	Macma4_01_g12410:upstream_gene_variant:-:-:-:-:-
chr01	8881783	CTCTCTCTT	C	L2-1-2-1-1-1-2-1-1	ES-CN29	1	Macma4_01_g12410:upstream_gene_variant:-:-:-:-:-
chr01	8892195	G	C	L1-2-1-2-2-2-2-1	PHL06	1	Macma4_01_g12420:intron_variant:-:-:-:-:-, Macma4_01_g12430:upstream_gene_variant:-:-:-:-:-
chr01	8901617	G	A	L2-2-1-2	COL02	1	Macma4_01_g12430:downstream_gene_variant:-:-:-:-:-, Macma4_01_g12440:upstream_gene_variant:-:-:-:-:-, Macma4_01_g12450:3_prime_UTR_variant:2474:-:-:-:-
chr01	8903933	C	A	L2-1-1-1-1-3-2-2-2-2-2-1-2	AUS06	1	Macma4_01_g12440:upstream_gene_variant:-:-:-:-:-, Macma4_01_g12450:intron_variant:-:-:-:-:-
chr01	8906186	G	C	L2-1-2-1-1-1-1-1-1-1-1-2-1-1	ECU06,ECU07,ECU09	3	Macma4_01_g12450:missense_variant:48:48:16:F/L:ttC/ttG
chr01	8908832	A	T	L1-2-2-1	PHL01	1	Macma4_01_g12450:upstream_gene_variant:-:-:-:-:-, Macma4_01_g12460:upstream_gene_variant:-:-:-:-:-
chr01	8912727	T	C	L1-2-2-2-1	VNM04	1	Macma4_01_g12460:5_prime_UTR_variant:31:-:-:-:-
chr01	8915683	T	C	L2-1-2-1-1-1-1-1-1-2-2	PHL09	1	Macma4_01_g12460:downstream_gene_variant:-:-:-:-:-
chr01	8916121	C	A	L2-1-2-1-1-1-1-1-2-2	CRI02	1	Macma4_01_g12460:downstream_gene_variant:-:-:-:-:-
chr01	8922362	T	A	L1-2-2-2-2-1	VNM06	1	Macma4_01_g12470:intron_variant:-:-:-:-:-
chr01	8923986	G	A	L1-2-2-2-2-2	CHN01,CHN02,CHN03,CHN04,CHN05,VNM10,TH-KOR01,TH-KOR02,TH-KOR03,TH-KOR04,TH-KOR05,TH-KOR06,TH-KOR07,TH-KOR08,VNM01,VNM03,VNM02,VNM05,VNM07	19	Macma4_01_g12470:upstream_gene_variant:-:-:-:-:-
chr01	8941329	C	T	L2	AUS01,AUS02,AUS03,AUS04,AUS05,AUS06,AUS07,AUS08,AUS09,AUS10,CMR01,CMR02,ES-CN01,ES-CN02,ES-CN03,ES-CN04,ES-CN05,ES-CN06,ES-CN07,ES-CN08,ES-CN09,ES-CN10,ES-CN11,ES-CN12,ES-CN13,ES-CN14,ES-CN15,ES-CN16,ES-CN17,ES-CN18,ES-CN19,ES-CN20,ES-CN21,ES-CN22,ES-CN23,ES-CN24,ES-CN25,ES-CN26,ES-CN27,ES-CN28,ES-CN29,ES-CN30,ES-CN31,ES-CN32,COL01,COL02,COL03,COL04,COL05,COL06,COL07,CRI01,CRI02,CRI03,CRI04,CRI05…	115	Macma4_01_g12500:downstream_gene_variant:-:-:-:-:-, Macma4_01_g12510:upstream_gene_variant:-:-:-:-:-
chr01	8948665	TG	T	L2-1-2-1-2	GTM01	1	Macma4_01_g12520:upstream_gene_variant:-:-:-:-:-
chr01	8950124	C	T	L2-1-1-1-1-3-2-2-2-2-3-2-2-2-1	CMR02	1	Macma4_01_g12520:5_prime_UTR_variant:229:-:-:-:-, Macma4_01_g12530:downstream_gene_variant:-:-:-:-:-
chr01	8955728	A	G	L1-1	KOR06	1	Macma4_01_g12520:downstream_gene_variant:-:-:-:-:-, Macma4_01_g12530:intron_variant:-:-:-:-:-, Macma4_01_g12540:downstream_gene_variant:-:-:-:-:-
chr01	8957662	T	A	L2-1-2-1-1-1-1-1-1-1-1-1-1-2	GLP01	1	Macma4_01_g12530:upstream_gene_variant:-:-:-:-:-, Macma4_01_g12540:3_prime_UTR_variant:1049:-:-:-:-, Macma4_01_g12550:downstream_gene_variant:-:-:-:-:-
chr01	8957978	G	C	L1-2-2-2-2-2-3-1-2	CHN04	1	Macma4_01_g12530:upstream_gene_variant:-:-:-:-:-, Macma4_01_g12540:missense_variant:733:682:228:L/V:Ctg/Gtg, Macma4_01_g12550:downstream_gene_variant:-:-:-:-:-
chr01	8960423	A	G	L2-1-2-1-1-1-1-1-2	CRI02,CRI08	2	Macma4_01_g12530:upstream_gene_variant:-:-:-:-:-, Macma4_01_g12540:intron_variant:-:-:-:-:-, Macma4_01_g12550:downstream_gene_variant:-:-:-:-:-
chr01	8960673	C	T	L2-1-2-1-1-1-1-1-1-1-1-1-2-1	KOR04	1	Macma4_01_g12530:upstream_gene_variant:-:-:-:-:-, Macma4_01_g12540:intron_variant:-:-:-:-:-, Macma4_01_g12550:downstream_gene_variant:-:-:-:-:-
chr01	8960905	C	T	L1-2-1-2-1	PHL10	1	Macma4_01_g12530:upstream_gene_variant:-:-:-:-:-, Macma4_01_g12540:missense_variant:653:602:201:G/D:gGt/gAt, Macma4_01_g12550:downstream_gene_variant:-:-:-:-:-
chr01	8968488	T	G	L2-1-1-1-2-1-1	ES-CN18	1	Macma4_01_g12550:upstream_gene_variant:-:-:-:-:-, Macma4_01_g12560:upstream_gene_variant:-:-:-:-:-
chr01	8970680	G	C	L2-1-2-1-1-1-1-1-1-1-1-2-2-2	COL04	1	Macma4_01_g12550:upstream_gene_variant:-:-:-:-:-, Macma4_01_g12560:missense_variant:1249:1196:399:G/A:gGt/gCt
chr01	8997800	G	A	L2-1-2-1-1-1-1-1-1-1-1-1-1-1-1	ES-CN25,ES-CN26,ES-CN31,ES-CN32,COL07,CRI03,CRI04,CRI05,CRI09,CRI10,ECU02,ECU03	12	Macma4_01_g12580:downstream_gene_variant:-:-:-:-:-, Macma4_01_g12590:synonymous_variant:2144:1576:526:L:Ctg/Ttg
chr01	8998924	C	G	L2-1-1-1-1-2-2	COL03,GLP02	2	Macma4_01_g12580:downstream_gene_variant:-:-:-:-:-, Macma4_01_g12590:synonymous_variant:1582:1014:338:A:gcG/gcC
chr01	9001715	C	T	L2-1-1-1-1-3-2-2-2-2-3-1	COL05	1	Macma4_01_g12590:upstream_gene_variant:-:-:-:-:-
chr01	9025816	C	T	L2-1-2-1-1-1-1-1-1-1-1-2-1	ECU06,ECU07,ECU09,GHA04,HND02	5	Macma4_01_g12620:intron_variant:-:-:-:-:-
chr01	9037892	C	T	L2-1-1-1-1-1-2-4-2-2-1	ES-CN11	1	Macma4_01_g12620:missense_variant:1835:1778:593:A/V:gCa/gTa, Macma4_01_g12630:upstream_gene_variant:-:-:-:-:-
chr01	9045415	A	C	L1-1	KOR06	1	Macma4_01_g12630:splice_polypyrimidine_tract_variant,intron_variant:-:-:-:-:-
chr01	9052902	G	T	L1-2-1-2-1	PHL10	1	Macma4_01_g12630:intron_variant:-:-:-:-:-
chr01	9053495	C	G	L2-1-2-1-1-1-1-1-1-1-1-2-1-1-1-2	ECU07	1	Macma4_01_g12630:missense_variant:824:824:275:S/C:tCt/tGt
chr01	9061192	A	G	L2-1-2-1-1-1-1-1-1-1-1-2-2-1-1	GLP03	1	Macma4_01_g12630:intron_variant:-:-:-:-:-
chr01	9062879	C	A	L2-1-2-1-1-1-1-1-1-1-1-1-1-1-1-1-2	COL07	1	Macma4_01_g12630:intron_variant:-:-:-:-:-, Macma4_01_g12640:upstream_gene_variant:-:-:-:-:-
chr01	9063103	G	T	L2-1-2-1-1-1-1-1-1-1-1-2-1-1-2	ECU06	1	Macma4_01_g12630:intron_variant:-:-:-:-:-, Macma4_01_g12640:upstream_gene_variant:-:-:-:-:-
chr01	9069711	C	A	L2-1-2-1-1-1-1-1-1-2-2	PHL09	1	Macma4_01_g12630:downstream_gene_variant:-:-:-:-:-, Macma4_01_g12640:synonymous_variant:2279:1536:512:I:atC/atA, Macma4_01_g12650:upstream_gene_variant:-:-:-:-:-, Macma4_01_g12660:upstream_gene_variant:-:-:-:-:-
chr01	9073656	G	T	L1-2-1-2-1	PHL10	1	Macma4_01_g12640:downstream_gene_variant:-:-:-:-:-, Macma4_01_g12650:downstream_gene_variant:-:-:-:-:-, Macma4_01_g12660:intron_variant:-:-:-:-:-
chr01	9074047	C	A	L2-1-2-1-1-1-1-1-1-1-1-1-1-1-1-1-1-1-1	CRI10	1	Macma4_01_g12640:downstream_gene_variant:-:-:-:-:-, Macma4_01_g12650:downstream_gene_variant:-:-:-:-:-, Macma4_01_g12660:intron_variant:-:-:-:-:-
chr01	9079785	T	C	L1-2-1-2-1	PHL10	1	Macma4_01_g12660:downstream_gene_variant:-:-:-:-:-, Macma4_01_g12670:upstream_gene_variant:-:-:-:-:-
chr01	9079787	T	A	L1-2-1-2-1	PHL10	1	Macma4_01_g12660:downstream_gene_variant:-:-:-:-:-, Macma4_01_g12670:upstream_gene_variant:-:-:-:-:-
chr01	9079789	T	C	L2-1-2-1-1-1-1-1-2-1	CRI08	1	Macma4_01_g12660:downstream_gene_variant:-:-:-:-:-, Macma4_01_g12670:upstream_gene_variant:-:-:-:-:-
chr01	9085982	T	G	L1-2-2-2-2-2-2-2	CHN05,VNM10,VNM07	3	Macma4_01_g12670:intron_variant:-:-:-:-:-
chr01	9088253	A	G	L2-1-1-1-1-3-2-2-1-1-1	ECU01	1	Macma4_01_g12670:intron_variant:-:-:-:-:-
chr01	9089529	T	G	L1-1	KOR06	1	Macma4_01_g12670:intron_variant:-:-:-:-:-
chr01	9090559	G	C	L2-1-1-1-1-1-2-5-2-1	ES-CN06	1	Macma4_01_g12670:missense_variant:1040:895:299:V/L:Gtt/Ctt
chr01	9102116	G	T	L2-1-1-1-1-3-2-1-1	DOM01	1	Macma4_01_g12680:downstream_gene_variant:-:-:-:-:-, Macma4_01_g12690:upstream_gene_variant:-:-:-:-:-
chr01	9113736	C	CA	L2-1-2-1-1-1-1-1-1-1-1-1-1	ES-CN25,ES-CN26,ES-CN31,ES-CN32,COL07,CRI03,CRI04,CRI05,CRI09,CRI10,ECU02,ECU03,GLP01,NIC02	14	Macma4_01_g12700:downstream_gene_variant:-:-:-:-:-, Macma4_01_g12710:downstream_gene_variant:-:-:-:-:-, Macma4_01_g12720:upstream_gene_variant:-:-:-:-:-
chr01	9115123	C	T	L2-1-1-1-1-3-2-2-1-1-1	ECU01	1	Macma4_01_g12700:downstream_gene_variant:-:-:-:-:-, Macma4_01_g12710:downstream_gene_variant:-:-:-:-:-, Macma4_01_g12720:upstream_gene_variant:-:-:-:-:-
chr01	9115997	G	T	L2-1-2-1-1-1-1-1-1-1-1-1-1-1-1-1-1-2-1	CRI04	1	Macma4_01_g12710:downstream_gene_variant:-:-:-:-:-, Macma4_01_g12720:synonymous_variant:290:156:52:V:gtG/gtT, Macma4_01_g12730:upstream_gene_variant:-:-:-:-:-, Macma4_01_g12740:upstream_gene_variant:-:-:-:-:-
chr01	9118380	C	T	L1-2-2-2-2-2-3-2-2-2-2-2-2	TH-KOR05	1	Macma4_01_g12720:missense_variant:523:389:130:A/V:gCg/gTg, Macma4_01_g12730:upstream_gene_variant:-:-:-:-:-, Macma4_01_g12740:upstream_gene_variant:-:-:-:-:-
chr01	9121003	C	T	L2-1-1-1-1-1-2-3-1	ES-CN03,ES-CN04	2	Macma4_01_g12720:downstream_gene_variant:-:-:-:-:-, Macma4_01_g12730:downstream_gene_variant:-:-:-:-:-, Macma4_01_g12740:missense_variant:233:233:78:S/L:tCg/tTg, Macma4_01_g12750:downstream_gene_variant:-:-:-:-:-
chr01	9125683	T	A	L2-1-1-1-1-3-2-2-2-2-2-2-1	AUS08	1	Macma4_01_g12740:downstream_gene_variant:-:-:-:-:-, Macma4_01_g12750:missense_variant:2142:1487:496:K/M:aAg/aTg, Macma4_01_g12760:upstream_gene_variant:-:-:-:-:-
chr01	9125796	C	T	L2-1-2-1-1-1-1-1-1-1-1-2-1-1	ECU06,ECU07,ECU09	3	Macma4_01_g12740:downstream_gene_variant:-:-:-:-:-, Macma4_01_g12750:synonymous_variant:2029:1374:458:R:agG/agA, Macma4_01_g12760:upstream_gene_variant:-:-:-:-:-
chr01	9129150	C	T	L2-1-1-1-1-2-2-1	COL03	1	Macma4_01_g12750:upstream_gene_variant:-:-:-:-:-, Macma4_01_g12760:upstream_gene_variant:-:-:-:-:-, Macma4_01_g12770:downstream_gene_variant:-:-:-:-:-
chr01	9135824	C	A	L1-2-2-2-2-2-2-2-2	CHN05,VNM07	2	Macma4_01_g12760:downstream_gene_variant:-:-:-:-:-, Macma4_01_g12770:upstream_gene_variant:-:-:-:-:-, Macma4_01_g12780:missense_variant:917:917:306:P/Q:cCg/cAg, Macma4_01_g12790:downstream_gene_variant:-:-:-:-:-
chr01	9139992	A	C	L2-1-1-1-1-2-2-1	COL03	1	Macma4_01_g12780:downstream_gene_variant:-:-:-:-:-, Macma4_01_g12790:intron_variant:-:-:-:-:-
chr01	9143097	C	T	L1-2-2-2-2-2-3-1-2	CHN04	1	Macma4_01_g12790:intron_variant:-:-:-:-:-, Macma4_01_g12800:downstream_gene_variant:-:-:-:-:-
chr01	9144247	C	A	L1-2-2-2-2-2-3-1-1	CHN03	1	Macma4_01_g12790:intron_variant:-:-:-:-:-, Macma4_01_g12800:downstream_gene_variant:-:-:-:-:-
chr01	9148627	AACCACTGCCTCCTTTAAGGTGGGGAAAGGAAGCTTGGAG	A	L1-2-2-2-2-2-3-2-2-2-2-2	TH-KOR03,TH-KOR05	2	Macma4_01_g12790:upstream_gene_variant:-:-:-:-:-, Macma4_01_g12800:5_prime_UTR_variant:452-490:-:-:-:-
chr01	9149468	G	T	L1-2-2-2-2-2-2-2-2-2	VNM07	1	Macma4_01_g12790:upstream_gene_variant:-:-:-:-:-, Macma4_01_g12800:upstream_gene_variant:-:-:-:-:-
chr01	9152440	T	A	L2-1-2-1-1-1-1-1-1-2-1	PAN01	1	Macma4_01_g12800:upstream_gene_variant:-:-:-:-:-
chr01	9153817	G	T	L2-1-2-1-1-1-1-1-1-1-1-1-1-1-1-2-1-2	ES-CN25	1	Macma4_01_g12800:upstream_gene_variant:-:-:-:-:-
chr01	9154130	C	T	L2-1-1-1-1-3-2-2-1-1-1	ECU01	1
chr01	9155478	C	G	L2-1-1-1-1-2-1	ES-CN20	1
chr01	9155992	G	T	L2-1-2-1-1-1-1-1-1-1-1-2-1-3	HND02	1
chr01	9159293	C	A	L2-1-2-1-1-1-1-1-1-1-1-1-1-1-2	NIC02	1	Macma4_01_g12810:downstream_gene_variant:-:-:-:-:-
chr01	9171161	T	C	L2-1-1-1-1-1-2-3-2-1	ES-CN09	1	Macma4_01_g12820:downstream_gene_variant:-:-:-:-:-, Macma4_01_g12830:upstream_gene_variant:-:-:-:-:-, Macma4_01_g12840:downstream_gene_variant:-:-:-:-:-
chr01	9188882	A	C	L2-1-1-1-1-3-2-2-2-2-3-2-1-1	DOM03	1	Macma4_01_g12850:upstream_gene_variant:-:-:-:-:-, Macma4_01_g12860:upstream_gene_variant:-:-:-:-:-
chr01	9192445	T	A	L2-1-2-1-1-1-1-1-1-1-1-1-1-1-1-1-1-2-1	CRI04	1	Macma4_01_g12860:downstream_gene_variant:-:-:-:-:-, Macma4_01_g12870:upstream_gene_variant:-:-:-:-:-
chr01	9198164	T	G	L2-1-1-1-1-3-2-2-1-2-2-1	ES-CN21	1	Macma4_01_g12870:intron_variant:-:-:-:-:-
chr01	9198218	C	T	L1-2-2-2-2-2-2-1-1	VNM01	1	Macma4_01_g12870:intron_variant:-:-:-:-:-
chr01	9202536	C	G	L1-2-2-2-2-2-3-2-1	CHN02,VNM05	2	Macma4_01_g12870:missense_variant:223:223:75:P/A:Cct/Gct, Macma4_01_g12880:upstream_gene_variant:-:-:-:-:-
chr01	9206186	G	T	L1-2-1-2-2-2-2-1	PHL06	1	Macma4_01_g12870:downstream_gene_variant:-:-:-:-:-, Macma4_01_g12880:missense_variant:321:90:30:L/F:ttG/ttT
chr01	9206192	C	T	L2-2-2-1-1	UKN02	1	Macma4_01_g12870:downstream_gene_variant:-:-:-:-:-, Macma4_01_g12880:synonymous_variant:327:96:32:T:acC/acT
chr01	9206724	T	A	L2-2-2-1-2	UKN01	1	Macma4_01_g12870:downstream_gene_variant:-:-:-:-:-, Macma4_01_g12880:intron_variant:-:-:-:-:-
chr01	9207370	T	C	L2-1-2-1-1-1-1-1-1-1-1-1-1-1-1-1-1-1	CRI09,CRI10	2	Macma4_01_g12870:downstream_gene_variant:-:-:-:-:-, Macma4_01_g12880:intron_variant:-:-:-:-:-
chr01	9208465	C	A	L2-1-2-2-1-1-2	PER04	1	Macma4_01_g12870:downstream_gene_variant:-:-:-:-:-, Macma4_01_g12880:intron_variant:-:-:-:-:-, Macma4_01_g12890:downstream_gene_variant:-:-:-:-:-
chr01	9217080	T	C	L2-1-2-1-1-1-1-1-1-1-1-2-1-3	HND02	1	Macma4_01_g12880:downstream_gene_variant:-:-:-:-:-, Macma4_01_g12890:upstream_gene_variant:-:-:-:-:-, Macma4_01_g12900:upstream_gene_variant:-:-:-:-:-
chr01	9219889	T	G	L2-1-2-1-1-1-1-1-1-1-1-1-1-1-1-2-2-2	CRI05	1	Macma4_01_g12890:upstream_gene_variant:-:-:-:-:-, Macma4_01_g12900:upstream_gene_variant:-:-:-:-:-
chr01	9243579	C	T	L2-1-1-1-1-3-2-2-2-2-3-2-2-2-2-1	CMR01	1	Macma4_01_g12930:missense_variant:657:617:206:R/Q:cGa/cAa, Macma4_01_g12940:upstream_gene_variant:-:-:-:-:-
chr01	9252168	G	T	L2-1-2-1-1-1-1-1-1-1-1-2-1	ECU06,ECU07,ECU09,GHA04,HND02	5	Macma4_01_g12930:upstream_gene_variant:-:-:-:-:-, Macma4_01_g12940:intron_variant:-:-:-:-:-
chr01	9253755	G	T	L2-1-2-1-1-1-1-1-1-1-1-2-2-1-2	ES-CN19	1	Macma4_01_g12940:downstream_gene_variant:-:-:-:-:-
chr01	9262604	T	C	L2-1-1-1-1-3-2-2-1-1-1	ECU01	1	Macma4_01_g12950:3_prime_UTR_variant:2043:-:-:-:-, Macma4_01_g12960:downstream_gene_variant:-:-:-:-:-
chr01	9264325	T	A	L2-1-1-1-1-1-2-5-2-1	ES-CN06	1	Macma4_01_g12950:downstream_gene_variant:-:-:-:-:-, Macma4_01_g12960:missense_variant:15325:15185:5062:E/V:gAg/gTg
chr01	9269181	A	T	L2-1-1-1-1-3-2-2-1-2-1	NIC01	1	Macma4_01_g12960:missense_variant:12354:12214:4072:L/M:Ttg/Atg
chr01	9269240	G	A	L1-2-1-2-1	PHL10	1	Macma4_01_g12960:intron_variant:-:-:-:-:-
chr01	9272767	G	A	L1-2-2-1	PHL01	1	Macma4_01_g12960:missense_variant:8851:8711:2904:S/L:tCg/tTg
chr01	9286441	C	T	L2-1-1-1-1-3-2-2-1-1-1	ECU01	1	Macma4_01_g12960:upstream_gene_variant:-:-:-:-:-, Macma4_01_g12970:downstream_gene_variant:-:-:-:-:-
chr01	9287403	G	A	L2-1-1-1-1-3-2-2-1-1-1	ECU01	1	Macma4_01_g12960:upstream_gene_variant:-:-:-:-:-, Macma4_01_g12970:downstream_gene_variant:-:-:-:-:-
chr01	9288377	G	A	L2-1-2-1-1-1-1-1-1-1-1-1-1-1-1-2-1	ES-CN25,ES-CN26	2	Macma4_01_g12960:upstream_gene_variant:-:-:-:-:-, Macma4_01_g12970:downstream_gene_variant:-:-:-:-:-
chr01	9297809	A	G	L2-1-2-1-1-1-1-1-1-1-1-1-1-1-1-1-1-1-2	CRI09	1	Macma4_01_g12970:upstream_gene_variant:-:-:-:-:-, Macma4_01_g12980:upstream_gene_variant:-:-:-:-:-, Macma4_01_g12990:3_prime_UTR_variant:2400:-:-:-:-
chr01	9304186	C	T	L2-1-1-1-1-1-2-4-1	ES-CN02	1	Macma4_01_g12990:upstream_gene_variant:-:-:-:-:-, Macma4_01_g13000:upstream_gene_variant:-:-:-:-:-
chr01	9307489	C	T	L2-1-1-1-1-1-2-4-2-2	ES-CN11,ES-CN12	2	Macma4_01_g12990:upstream_gene_variant:-:-:-:-:-, Macma4_01_g13000:upstream_gene_variant:-:-:-:-:-
chr01	9313056	A	G	L2-1-2-1-2	GTM01	1	Macma4_01_g13000:intron_variant:-:-:-:-:-
chr01	9321552	T	TC	L2-1-2-1-1-1-1-1-1-1-1-2	ES-CN19,COL04,ECU06,ECU07,ECU09,GHA04,GLP03,HND02	8	Macma4_01_g13000:downstream_gene_variant:-:-:-:-:-, Macma4_01_g13010:upstream_gene_variant:-:-:-:-:-, Macma4_01_g13020:downstream_gene_variant:-:-:-:-:-
chr01	9321553	A	T	L2-1-2-1-1-1-1-1-1-1-1-2	ES-CN19,COL04,ECU06,ECU07,ECU09,GHA04,GLP03,HND02	8	Macma4_01_g13000:downstream_gene_variant:-:-:-:-:-, Macma4_01_g13010:upstream_gene_variant:-:-:-:-:-, Macma4_01_g13020:downstream_gene_variant:-:-:-:-:-
chr01	9327145	A	G	L1-2-2-2-2-2-3-2-2-2-1	TH-KOR06,TH-KOR08	2	Macma4_01_g13020:intron_variant:-:-:-:-:-
chr01	9339883	C	T	L2-1-2-1-1-1-1-1-1-2-2	PHL09	1	Macma4_01_g13030:missense_variant:312:246:82:M/I:atG/atA, Macma4_01_g13040:downstream_gene_variant:-:-:-:-:-
chr01	9342972	G	T	L2-1-2-1-1-1-1-1-1-1-1-2-1	ECU06,ECU07,ECU09,GHA04,HND02	5	Macma4_01_g13030:upstream_gene_variant:-:-:-:-:-, Macma4_01_g13040:missense_variant:1395:1395:465:F/L:ttC/ttA, Macma4_01_g13050:downstream_gene_variant:-:-:-:-:-
chr01	9344318	T	C	L2-1-2-1-1-1-1-1-1-1-2-1-2	PHL03	1	Macma4_01_g13030:upstream_gene_variant:-:-:-:-:-, Macma4_01_g13040:missense_variant:319:319:107:S/G:Agc/Ggc, Macma4_01_g13050:downstream_gene_variant:-:-:-:-:-
chr01	9349967	C	A	L1-2-2-2-2-2-1	CHN01	1	Macma4_01_g13050:upstream_gene_variant:-:-:-:-:-
chr01	9354512	A	T	L2-1-1-1-1-3-2-2-1-2-2	ES-CN21,ES-CN22	2	Macma4_01_g13060:downstream_gene_variant:-:-:-:-:-
chr01	9357870	G	T	L2-1-1-1-1-3-2-2-1-1-2-2	AUS03	1	Macma4_01_g13060:downstream_gene_variant:-:-:-:-:-
chr01	9363906	A	T	L2-1-2-1-1-1-2-2	ES-CN30	1	Macma4_01_g13060:upstream_gene_variant:-:-:-:-:-, Macma4_01_g13070:downstream_gene_variant:-:-:-:-:-
chr01	9365504	G	A	L2-1-2-1-1-1-1-1-1-1-1-1-1-1-1-3	ECU02,ECU03	2	Macma4_01_g13060:upstream_gene_variant:-:-:-:-:-, Macma4_01_g13070:downstream_gene_variant:-:-:-:-:-
chr01	9368140	G	A	L1-2-2-2-2-2-3-2-2-1-2	TH-KOR02,TH-KOR04	2	Macma4_01_g13070:synonymous_variant:375:375:125:A:gcC/gcT, Macma4_01_g13080:downstream_gene_variant:-:-:-:-:-
chr01	9372367	T	A	L2-1-1-1-1-3-2-2-2-2-2-2-3-1	AUS10	1	Macma4_01_g13070:upstream_gene_variant:-:-:-:-:-, Macma4_01_g13080:missense_variant:1059:1007:336:Y/F:tAt/tTt
chr01	9373684	C	A	L2-1-2-1-1-1-1-1-1-1-1-2-2-1-2	ES-CN19	1	Macma4_01_g13070:upstream_gene_variant:-:-:-:-:-, Macma4_01_g13080:intron_variant:-:-:-:-:-
chr01	9378567	C	T	L1-2-2-2-2-2-3-2-2-2-2-1	TH-KOR07	1	Macma4_01_g13080:upstream_gene_variant:-:-:-:-:-
[truncated: 95,623 more rows]

## Sheet: StructuralVariations
CHROM1	POS1	CHROM2	POS2	SVTYPE	Lineage	SampleID	SampleNo	GeneAnnotation
chr01	18938468	chr01	18939287	DUP	L1-2-2-2-2-2-3-2-2	TH-KOR01,TH-KOR02,TH-KOR03,TH-KOR04,TH-KOR05,TH-KOR06,TH-KOR07,TH-KOR08	8	Macma4_01_g21440:downstream_gene_variant:-:-:-:-:-, Macma4_01_g21450:5_prime_UTR_variant:?-10:-:-:-:-
chr01	21026166	chr01	21027657	DEL	L1-2-2-2-2-2	CHN01,CHN02,CHN03,CHN04,CHN05,VNM10,TH-KOR01,TH-KOR02,TH-KOR03,TH-KOR04,TH-KOR05,TH-KOR06,TH-KOR07,TH-KOR08,VNM01,VNM03,VNM02,VNM05,VNM07	19	Macma4_01_g22600:upstream_gene_variant:-:-:-:-:-
chr02	24978657	chr02	24981340	DUP	L2	AUS01,AUS02,AUS03,AUS04,AUS05,AUS06,AUS07,AUS08,AUS09,AUS10,CMR01,CMR02,ES-CN01,ES-CN02,ES-CN03,ES-CN04,ES-CN05,ES-CN06,ES-CN07,ES-CN08,ES-CN09,ES-CN10,ES-CN11,ES-CN12,ES-CN13,ES-CN14,ES-CN15,ES-CN16,ES-CN17,ES-CN18,ES-CN19,ES-CN20,ES-CN21,ES-CN22,ES-CN23,ES-CN24,ES-CN25,ES-CN26,ES-CN27,ES-CN28,ES-CN29,ES-CN30,ES-CN31,ES-CN32,COL01,COL02,COL03,COL04,COL05,COL06,COL07,CRI01,CRI02,CRI03,CRI04,CRI05…	115	Macma4_02_g11540:downstream_gene_variant:-:-:-:-:-, Macma4_02_g11550:coding_sequence_variant,5_prime_UTR_variant,intron_variant:?-719:?-554:?-185:-:-
chr03	36762588	chr03	36763149	DUP	L1-2-2-2-2-2-3-2-2	TH-KOR01,TH-KOR02,TH-KOR03,TH-KOR04,TH-KOR05,TH-KOR06,TH-KOR07,TH-KOR08	8	Macma4_03_g24960:upstream_gene_variant:-:-:-:-:-, Macma4_03_g24970:downstream_gene_variant:-:-:-:-:-, Macma4_03_g24980:upstream_gene_variant:-:-:-:-:-
chr04	34066684	chr04	34066737	DEL	L1-2-1-2-2	PHL02,PHL05,PHL06,VNM09	4	Macma4_04_g26230:upstream_gene_variant:-:-:-:-:-
chr05	6996915	chr05	6997485	DEL	L1-2-2-2-2	CHN01,CHN02,CHN03,CHN04,CHN05,VNM10,TH-KOR01,TH-KOR02,TH-KOR03,TH-KOR04,TH-KOR05,TH-KOR06,TH-KOR07,TH-KOR08,VNM01,VNM03,VNM02,VNM05,VNM06,VNM07	20	Macma4_05_g09780:intron_variant:-:-:-:-:-
chr05	29277892	chr05	29278858	DEL	L1-2-2-2-2-2-3-2-2-2	TH-KOR03,TH-KOR05,TH-KOR06,TH-KOR07,TH-KOR08	5	Macma4_05_g19040:upstream_gene_variant:-:-:-:-:-
chr06	7260598	chr06	7261097	DEL	L1-2-2	CHN01,CHN02,CHN03,CHN04,CHN05,VNM10,TH-KOR01,TH-KOR02,TH-KOR03,TH-KOR04,TH-KOR05,TH-KOR06,TH-KOR07,TH-KOR08,PHL01,VNM01,VNM03,VNM02,VNM04,VNM05,VNM06,VNM07	22	Macma4_06_g10450:downstream_gene_variant:-:-:-:-:-
chr08	11461390	chr08	11462457	DEL	L1	CHN01,CHN02,CHN03,CHN04,CHN05,VNM10,TH-KOR01,TH-KOR02,TH-KOR03,TH-KOR04,TH-KOR05,TH-KOR06,TH-KOR07,TH-KOR08,PHL02,KOR01,KOR06,PHL01,PHL05,PHL06,PHL10,VNM01,VNM03,VNM02,VNM04,VNM05,VNM06,VNM07,VNM09	29	Macma4_08_g14350:downstream_gene_variant:-:-:-:-:-, Macma4_08_g14360:upstream_gene_variant:-:-:-:-:-, Macma4_08_g14370:downstream_gene_variant:-:-:-:-:-
chr08	38144928	chr08	38146184	DEL	L1-2-2-2-2-2-3-2-2	TH-KOR01,TH-KOR02,TH-KOR03,TH-KOR04,TH-KOR05,TH-KOR06,TH-KOR07,TH-KOR08	8	Macma4_08_g19390:intron_variant:-:-:-:-:-
chr08	39389073	chr08	39389129	DEL	L1-2-2-2-2-2-3-2-2	TH-KOR01,TH-KOR02,TH-KOR03,TH-KOR04,TH-KOR05,TH-KOR06,TH-KOR07,TH-KOR08	8
chr10	38910015	chr10	40439719	HAP CHANGE	L2-1-2-2	ECU10,PER01,PER02,PER04,PER05,PER06	6	Macma4_10_g33350:downstream_gene_variant:-:-:-:-:-, Macma4_10_g33360:upstream_gene_variant:-:-:-:-:-, Macma4_10_g33370:transcript_ablation:-:-:-:-:-, Macma4_10_g33380:transcript_ablation:-:-:-:-:-, Macma4_10_g33390:transcript_ablation:-:-:-:-:-, Macma4_10_g33400:transcript_ablation:-:-:-:-:-, Macma4_10_g33410:transcript_ablation:-:-:-:-:-, Macma4_10_g33420:transcript_ablation:-:-:-:-:-, Macma4_10…
chr10	40115318	chr10	40115377	DEL	L1-2-2-2-2-2-2-1	VNM01,VNM03,VNM02	3	Macma4_10_g35050:upstream_gene_variant:-:-:-:-:-, Macma4_10_g35060:downstream_gene_variant:-:-:-:-:-, Macma4_10_g35070:frameshift_variant,feature_truncation:607-665:607-665:203-222:-:-
chr11	9836837	chr11	9837906	DEL	L1-2-2-2-2-2-3-2-2	TH-KOR01,TH-KOR02,TH-KOR03,TH-KOR04,TH-KOR05,TH-KOR06,TH-KOR07,TH-KOR08	8	Macma4_11_g10630:stop_lost,feature_truncation,coding_sequence_variant,3_prime_UTR_variant:749-?:749-?:250-?:-:-, Macma4_11_g10640:upstream_gene_variant:-:-:-:-:-
chr11	12176233	chr11	12177348	INV	L1-2-2-2-2-2-3-2-2-1	TH-KOR01,TH-KOR02,TH-KOR04	3	Macma4_11_g11490:downstream_gene_variant:-:-:-:-:-, Macma4_11_g11500:coding_sequence_variant,intron_variant:1579-?:1579-?:527-?:-:-, Macma4_11_g11510:upstream_gene_variant:-:-:-:-:-
