# Supplementary material
Source: Research Square preprint supplement (doi:10.21203/rs.3.rs-9199400/v1)
Supplement: Supplementary file 5 [file f928bad6c3e5ae82c0ec173f.xlsx]

## Sheet: Sheet1
Supplementary Table 1. Metadata for whole-genome sequences of 144 Cavendish bananas investigated in this study
No.	SampleID	Country	Lineage	Brand	SequencingDepth	SNV	SBS-A	SBS-B	SBS-C	Indel	TotalPointMutations	SamplingDate	Note
1	AUS01	AUS	L2-1-1-1-1-3-2-2-2-2-2-1-1	Aldi	153.54	872	744	39	89	932	1804	2025.06.09
2	AUS02	AUS	L2-1-1-1-1-3-2-2-2-2-1	Aldi	126.91	1051	784	51	217	1128	2179	2025.06.09
3	AUS03	AUS	L2-1-1-1-1-3-2-2-1-1-2-2	Coles	171.14	927	784	61	82	996	1923	2025.06.09
4	AUS04	AUS	L2-1-1-1-1-3-2-2-2-2-2-2-3-2-1	Coles	162.71	1084	843	45	196	1150	2234	2025.06.09
5	AUS05	AUS	L2-1-1-1-1-3-2-2-2-2-2-2-2	Coles	142.91	1122	820	70	232	1201	2323	2025.06.09
6	AUS06	AUS	L2-1-1-1-1-3-2-2-2-2-2-1-2	Harris Farm	160.3	886	756	50	80	949	1835	2025.06.09
7	AUS07	AUS	L2-1-1-1-1-3-2-2-2-2-2-2-3-2-2	Woolworths	172.46	1014	814	61	138	1084	2098	2025.06.09
8	AUS08	AUS	L2-1-1-1-1-3-2-2-2-2-2-2-1	Woolworths	164.94	1104	812	74	218	1181	2285	2025.06.09
9	AUS09	AUS	L2-1-1-1-1-3-1	Paddy's market	188.94	986	768	60	158	1056	2042	2025.06.09
10	AUS10	AUS	L2-1-1-1-1-3-2-2-2-2-2-2-3-1	Thai Kee IGA	173.23	970	773	72	125	1048	2018	2025.06.09
11	CHN01	CHN	L1-2-2-2-2-2-1		103.57	2669	1047	162	1459	2808	5477		Public data from Li, X. et al. Nature Genetics (2023)
12	CHN02	CHN	L1-2-2-2-2-2-3-2-1-2		117.55	2585	1075	135	1374	2716	5301		Public data from Huang, H.-R. et al. Horticulture Research (2023)
13	CHN03	CHN	L1-2-2-2-2-2-3-1-1	XINFA	267.22	2519	1009	127	1382	2650	5169	2025.04.14
14	CHN04	CHN	L1-2-2-2-2-2-3-1-2	XINFA	253.58	2613	1098	113	1402	2761	5374	2025.04.14
15	CHN05	CHN	L1-2-2-2-2-2-2-2-2-1	SOFIA	236.01	2638	1055	158	1425	2767	5405	2025.04.14
16	CMR01	CMR	L2-1-1-1-1-3-2-2-2-2-3-2-2-2-2-1	SCB PREMIUM	126.2	2143	856	611	676	2253	4396	2024.04.30
17	CMR02	CMR	L2-1-1-1-1-3-2-2-2-2-3-2-2-2-1	SCB PREMIUM	300.61	2364	936	650	779	2483	4847	2024.04.30
18	COL01	COL	L2-2-1-1-1-3	Latida	114.61	1467	966	181	320	1546	3013	2023.08
19	COL02	COL	L2-2-1-2	Latida	136.42	1000	842	76	82	1066	2066	2023.08
20	COL03	COL	L2-1-1-1-1-2-2-1	Sumifru	262.85	2083	679	762	642	2186	4269	2023.12.26
21	COL04	COL	L2-1-2-1-1-1-1-1-1-1-1-2-2-2	Sumifru	178.77	2183	970	539	675	2288	4471	2023.12.26
22	COL05	COL	L2-1-1-1-1-3-2-2-2-2-3-1	Sainsbury	107.83	1919	808	498	613	2020	3939	2024.05.02
23	COL06	COL	L2-2-1-1-1-1-1	Sainsbury	137.12	1025	895	54	76	1097	2122	2025.06.24
24	COL07	COL	L2-1-2-1-1-1-1-1-1-1-1-1-1-1-1-1-2	Tesco	150.47	2347	982	695	670	2484	4831	2025.06.24
25	CRI01	CRI	L2-1-2-1-1-1-1-1-1-1-2-2	Chiquita	166.74	1088	894	82	112	1158	2246	2023.08
26	CRI02	CRI	L2-1-2-1-1-1-1-1-2-2	Chiquita	185.7	2055	1082	273	700	2170	4225	2023.10.31
27	CRI03	CRI	L2-1-2-1-1-1-1-1-1-1-1-1-1-1-1-1-1-2-2	Dole	147.14	1985	915	691	379	2083	4068	2024.03.03
28	CRI04	CRI	L2-1-2-1-1-1-1-1-1-1-1-1-1-1-1-1-1-2-1	Dole	116.77	2017	912	681	425	2119	4136	2024.03.03
29	CRI05	CRI	L2-1-2-1-1-1-1-1-1-1-1-1-1-1-1-2-2-2	Delmonte	165	2682	938	787	956	2819	5501	2024.03.03
30	CRI06	CRI	L2-2-1-1-2	Delmonte	139.83	1185	875	78	232	1265	2450	2024.03.03
31	CRI07	CRI	L2-1-1-1-2-2-1	Delmonte	124.51	1021	837	98	87	1090	2111	2024.03.03
32	CRI08	CRI	L2-1-2-1-1-1-1-1-2-1	Chiquita	188.74	2004	1114	242	648	2108	4112	2025.01.21
33	CRI09	CRI	L2-1-2-1-1-1-1-1-1-1-1-1-1-1-1-1-1-1-2	Dole	268.43	2861	923	798	1140	2997	5858	2025.05.02
34	CRI10	CRI	L2-1-2-1-1-1-1-1-1-1-1-1-1-1-1-1-1-1-1	Dole	224.63	2710	922	780	1007	2843	5553	2025.05.02
35	DOM01	DOM	L2-1-1-1-1-3-2-1-1	Tesco	132.83	1473	863	111	500	1556	3029	2024.05.01
36	DOM02	DOM	L2-1-1-1-1-3-2-1-2	Tesco	147.99	1445	864	86	495	1533	2978	2024.05.01
37	DOM03	DOM	L2-1-1-1-1-3-2-2-2-2-3-2-1-1	WAITROSE & partners	113.86	1785	796	382	606	1885	3670	2024.06.14
38	DOM04	DOM	L2-1-2-3	Sainsbury	157.99	865	756	31	78	928	1793	2025.06.24
39	ECU01	ECU	L2-1-1-1-1-3-2-2-1-1-1	Manna	174.14	2021	958	172	891	2155	4176	2023.08.07
40	ECU02	ECU	L2-1-2-1-1-1-1-1-1-1-1-1-1-1-1-3-2	Manna	195.49	2372	978	726	667	2491	4863	2023.08.07
41	ECU03	ECU	L2-1-2-1-1-1-1-1-1-1-1-1-1-1-1-3-1	Manna	139.08	2336	949	732	655	2456	4792	2023.08.07
42	ECU04	ECU	L2-2-1-1-1-1-2	BanaValley	149.91	968	827	61	80	1037	2005	2024.01.16
43	ECU05	ECU	L2-1-1-1-2-2-2	BanaValley	174.93	1193	844	107	243	1279	2472	2024.01.16
44	ECU06	ECU	L2-1-2-1-1-1-1-1-1-1-1-2-1-1-2	Chiquita	138.74	2546	977	742	827	2670	5216	2024.03.03
45	ECU07	ECU	L2-1-2-1-1-1-1-1-1-1-1-2-1-1-1-2	Chiquita	130.15	2913	1006	813	1094	3041	5954	2024.03.03
46	ECU08	ECU	L2-1-1-1-1-3-2-2-2-2-3-2-2-1	Tesco	118.58	2131	879	637	615	2239	4370	2024.05.02
47	ECU09	ECU	L2-1-2-1-1-1-1-1-1-1-1-2-1-1-1-1	Sumifru	157.37	2527	943	758	826	2646	5173	2025.01.21
48	ECU10	ECU	L2-1-2-2-1-2-1	Dole	207.24	971	831	54	86	1039	2010	2025.05.02
49	ENG01	ENG	L2-1-1-1-1-1-1-2-1-1		406.97	792	675	40	76	848	1640	2025.06.20	Chatsworth House, UK
50	ENG02	ENG	L2-1-1-1-1-1-1-2-1-2		468.91	789	672	41	76	845	1634	2025.06.20	Chatsworth House, UK
51	ENG03	ENG	L2-1-1-1-1-1-1-2-2-1		221.17	797	670	48	80	856	1653	2025.06.20	Chatsworth House, UK
52	ENG04	ENG	L2-1-1-1-1-1-1-1		158.38	787	682	27	78	848	1635	2025.07.02	Chatsworth House, UK
53	ENG05	ENG	L2-1-1-1-1-1-1-2-2-2		154.69	790	665	45	80	848	1638	2025.07.02	Chatsworth House, UK
54	ES-CN01	ES-CN	L2-1-1-1-1-1-2-5-1	PLATANO DE CANARIA	130.61	857	689	75	93	913	1770	2024.11.14
55	ES-CN02	ES-CN	L2-1-1-1-1-1-2-4-1	PLATANO DE CANARIA	127.07	882	667	120	95	939	1821	2024.11.14
56	ES-CN03	ES-CN	L2-1-1-1-1-1-2-3-1-1	PLATANOS RUIZ	137.42	1411	830	107	474	1478	2889	2024.11.14
57	ES-CN04	ES-CN	L2-1-1-1-1-1-2-3-1-2	PLATANOS RUIZ	123.33	1404	824	109	471	1471	2875	2024.11.14
58	ES-CN05	ES-CN	L2-1-1-1-1-1-2-5-2-3-2-1	PLATANOS RUIZ	124.33	1305	747	213	345	1393	2698	2024.11.14
59	ES-CN06	ES-CN	L2-1-1-1-1-1-2-5-2-1	REMO	132.03	1035	753	92	191	1099	2134	2024.11.14
60	ES-CN07	ES-CN	L2-1-1-1-1-1-2-5-2-3-2-2	CULTESA	145.34	941	713	142	86	1012	1953	2025.06.04	Gruesa Palmera
61	ES-CN08	ES-CN	L2-1-1-1-1-1-2-5-2-3-1	CULTESA	159.7	998	706	204	88	1063	2061	2025.06.04	Gruesa Palmera
62	ES-CN09	ES-CN	L2-1-1-1-1-1-2-3-2-1	CULTESA	166.79	980	743	99	137	1052	2032	2025.06.04	Brier
63	ES-CN10	ES-CN	L2-1-1-1-1-1-2-3-2-2	CULTESA	139.67	1163	769	97	297	1237	2400	2025.06.04	Brier
64	ES-CN11	ES-CN	L2-1-1-1-1-1-2-4-2-2-1	CULTESA	181.33	956	731	165	59	1016	1972	2025.06.04	Palmerita Tomasa
65	ES-CN12	ES-CN	L2-1-1-1-1-1-2-4-2-2-2	CULTESA	152.72	952	723	159	70	1013	1965	2025.06.04	Palmerita Tomasa
66	ES-CN13	ES-CN	L2-1-1-1-1-1-2-2-1	CULTESA	216.19	882	708	106	68	944	1826	2025.06.04	Ricasa
67	ES-CN14	ES-CN	L2-1-1-1-1-1-2-2-2	CULTESA	211.53	1054	706	120	228	1114	2168	2025.06.04	Ricasa
68	ES-CN15	ES-CN	L2-1-1-1-1-1-2-4-2-1	CULTESA	199.41	843	689	72	83	903	1746	2025.06.04	Criolla o "Del País"
69	ES-CN16	ES-CN	L2-1-1-1-1-1-2-1	CULTESA	174.48	918	612	209	97	977	1895	2025.06.04	Criolla o "Del País"
70	ES-CN17	ES-CN	L2-1-1-1-2-1-2	CULTESA	217.53	1326	841	146	339	1403	2729	2025.06.04	Robusta
71	ES-CN18	ES-CN	L2-1-1-1-2-1-1	CULTESA	190.23	1366	841	140	385	1443	2809	2025.06.04	Robusta
72	ES-CN19	ES-CN	L2-1-2-1-1-1-1-1-1-1-1-2-2-1-2	CULTESA	148.39	2127	1011	454	662	2218	4345	2025.06.04	Zelig
73	ES-CN20	ES-CN	L2-1-1-1-1-2-1	CULTESA	196.47	1493	796	240	458	1578	3071	2025.06.04	Zelig
74	ES-CN21	ES-CN	L2-1-1-1-1-3-2-2-1-2-2-1	CULTESA	186.87	1857	641	916	300	1951	3808	2025.06.04	Williams
75	ES-CN22	ES-CN	L2-1-1-1-1-3-2-2-1-2-2-2	CULTESA	209.54	2036	633	972	430	2130	4166	2025.06.04	Williams
76	ES-CN23	ES-CN	L2-1-1-1-1-1-2-5-2-2-1	CULTESA	178.13	995	758	100	137	1060	2055	2025.06.04	Jhonson
77	ES-CN24	ES-CN	L2-1-1-1-1-1-2-5-2-2-2	CULTESA	202.21	985	749	103	133	1049	2034	2025.06.04	Jhonson
78	ES-CN25	ES-CN	L2-1-2-1-1-1-1-1-1-1-1-1-1-1-1-2-1-2	CULTESA	195.85	2589	881	780	927	2697	5286	2025.06.04	Gran Enana-Kabanas
79	ES-CN26	ES-CN	L2-1-2-1-1-1-1-1-1-1-1-1-1-1-1-2-1-1	CULTESA	146.77	2412	896	755	761	2531	4943	2025.06.04	Gran Enana-Kabanas
80	ES-CN27	ES-CN	L2-1-2-1-1-2-2	CULTESA	165.71	1324	953	50	321	1401	2725	2025.06.04	Gran Enana-Cueva del Polvo
81	ES-CN28	ES-CN	L2-1-2-1-1-2-1	CULTESA	147.19	1154	958	35	161	1220	2374	2025.06.04	Gran Enana-Cueva del Polvo
82	ES-CN29	ES-CN	L2-1-2-1-1-1-2-1-1	CULTESA	169.9	1018	833	63	122	1085	2103	2025.06.04	Gran Enana-Laja
83	ES-CN30	ES-CN	L2-1-2-1-1-1-2-2	CULTESA	128.25	1066	847	112	107	1143	2209	2025.06.04	Gran Enana-Laja
84	ES-CN31	ES-CN	L2-1-2-1-1-1-1-1-1-1-1-1-1-1-1-2-2-1	CULTESA	253.48	1774	834	654	286	1869	3643	2025.06.04	Gran Enana-La Palma
85	ES-CN32	ES-CN	L2-1-2-1-1-1-1-1-1-1-1-1-1-1-1-4	CULTESA	127.43	1555	773	643	140	1637	3192	2025.06.04	Gran Enana-La Palma
86	GHA01	GHA	L2-1-2-1-1-1-3-2	Sainsbury	97.96	1446	996	81	369	1534	2980	2024.05.01
87	GHA02	GHA	L2-1-2-1-1-1-3-1	Sainsbury	48.17	1421	1054	58	309	1501	2922	2024.05.01
88	GHA03	GHA	L2-1-1-1-1-3-2-2-2-2-3-2-2-2-2-2	Tesco	113.93	2090	865	622	602	2189	4279	2025.06.24
89	GHA04	GHA	L2-1-2-1-1-1-1-1-1-1-1-2-1-2	Sainsbury	133.9	1692	868	651	174	1786	3478	2025.06.24
90	GLP01	GLP	L2-1-2-1-1-1-1-1-1-1-1-1-1-2	Banana de Guadeloupe & Martinique	123.05	2085	902	594	589	2185	4270	2024.05.01
91	GLP02	GLP	L2-1-1-1-1-2-2-2	Banana de Guadeloupe & Martinique	113.23	1651	722	573	356	1740	3391	2024.05.01
92	GLP03	GLP	L2-1-2-1-1-1-1-1-1-1-1-2-2-1-1	Banana de Guadeloupe & Martinique	154.12	2031	972	467	591	2129	4160	2025.06.24
93	GTM01	GTM	L2-1-2-1-2	Delmonte	128.73	1808	1041	154	612	1913	3721	2023.02
94	GTM02	GTM	L2-2-2-2-2	Chiquita	185.12	1287	1042	78	167	1371	2658	2023.08
95	GTM03	GTM	L2-1-2-1-1-1-2-1-2	Chiquita	143.78	1475	973	133	369	1563	3038	2024.03.03
96	HND01	HND	L2-1-2-1-1-1-1-1-1-1-3	Dole	186.68	1442	956	152	333	1528	2970	2025.05.02
97	HND02	HND	L2-1-2-1-1-1-1-1-1-1-1-2-1-3	Dole	207.52	3078	963	807	1307	3226	6304	2025.05.02
98	KOR01	KOR	L1-2-1-1	Sweetmonkey	153.4	1141	796	66	279	1209	2350	2023.02
99	KOR02	KOR	L2-1-1-1-1-3-2-2-2-2-3-2-1-2-1	Sweetmonkey	188.29	2046	942	410	694	2159	4205	2023.08
100	KOR03	KOR	L2-1-2-1-1-1-1-1-1-1-1-1-2-2	Shinan	155.28	2495	1005	727	763	2614	5109	2023.12.29
101	KOR04	KOR	L2-1-2-1-1-1-1-1-1-1-1-1-2-1	Shinan	140.03	2697	1048	697	953	2822	5519	2023.12.29
102	KOR05	KOR	L2-1-1-1-1-3-2-2-2-2-3-2-1-2-2	allbanana	134.63	1923	941	379	603	2032	3955	2024.01.03
103	KOR06	KOR	L1-1	allbanana	152.13	1868	885	184	799	1957	3825	2024.01.03
104	MEX01	MEX	L2-2-2-2-1	Chiquita	159.76	1607	1044	89	474	1688	3295	2023.10.11
105	MEX02	MEX	L2-1-2-1-1-1-1-2	Chiquita	100.47	1897	1118	114	666	1983	3880	2024.01.29
106	NIC01	NIC	L2-1-1-1-1-3-2-2-1-2-1	M&S	110.29	1717	761	475	481	1808	3525	2024.05.01
107	NIC02	NIC	L2-1-2-1-1-1-1-1-1-1-1-1-1-1-2	M&S	106.54	2034	910	637	487	2140	4174	2024.05.01
108	PAN01	PAN	L2-1-2-1-1-1-1-1-1-2-1	ROSY	159.5	2514	1055	398	1061	2659	5173	2023.05
109	PER01	PER	L2-1-2-2-2	Dole	178.6	871	727	56	88	935	1806	2023.08
110	PER02	PER	L2-1-2-2-1-2-2	Dole	168.54	919	787	39	93	983	1902	2023.08
111	PER03	PER	L2-2-1-1-1-2	Dole	175.46	904	801	38	65	967	1871	2023.08
112	PER04	PER	L2-1-2-2-1-1-2	Sumifru	154.75	1013	788	46	179	1089	2102	2023.12.27
113	PER05	PER	L2-1-2-2-1-1-1	Sumifru	135.65	1045	823	52	171	1121	2166	2023.12.27
114	PER06	PER	L2-1-2-2-1-1-3	Carrefour	128.55	937	815	54	68	1010	1947	2024.05.02
115	PHL01	PHL	L1-2-2-1	Delmonte	217.31	940	743	54	143	996	1936	2023.08
116	PHL02	PHL	L1-2-1-2-2-2-2-2	Family Kitchen	126.42	1335	852	54	429	1409	2744	2023.10.15
117	PHL03	PHL	L2-1-2-1-1-1-1-1-1-1-2-1-2	Sumifru	197.18	1623	1024	118	482	1714	3337	2023.12.26
118	PHL04	PHL	L2-1-2-1-1-1-1-1-1-1-2-1-1	Sumifru	143.09	1352	985	75	291	1432	2784	2023.12.26
119	PHL05	PHL	L1-2-1-2-2-2-1	Dole	137.55	1402	901	55	446	1478	2880	2023.12.27
120	PHL06	PHL	L1-2-1-2-2-2-2-1	Dole	145.2	1323	764	120	438	1399	2722	2023.12.27
121	PHL07	PHL	L2-1-1-1-1-3-2-2-1-1-2-1	Mannada	79.46	1117	836	56	226	1186	2303	2024.01.16
122	PHL08	PHL	L2-1-1-1-1-3-2-2-2-1	Mannada	179.7	929	753	43	133	1002	1931	2024.01.16
123	PHL09	PHL	L2-1-2-1-1-1-1-1-1-2-2	Delmonte	133.85	2227	1092	176	959	2375	4602	2024.03.03
124	PHL10	PHL	L1-2-1-2-1	Sumifru	156.26	3591	934	286	2371	3766	7357	2025.01.21
125	TH-KOR01	TH-KOR	L1-2-2-2-2-2-3-2-2-1-1		126.27	3733	1161	258	2315	3929	7662	2024.07.15	Jeju, Republic of Korea
126	TH-KOR02	TH-KOR	L1-2-2-2-2-2-3-2-2-1-2-1		123.17	3461	1127	237	2098	3641	7102	2024.07.15	Jeju, Republic of Korea
127	TH-KOR03	TH-KOR	L1-2-2-2-2-2-3-2-2-2-2-2-1		135.04	3542	1232	235	2075	3725	7267	2024.07.15	Jeju, Republic of Korea
128	TH-KOR04	TH-KOR	L1-2-2-2-2-2-3-2-2-1-2-2		131.23	3498	1156	235	2107	3677	7175	2024.07.17	Jeju, Republic of Korea
129	TH-KOR05	TH-KOR	L1-2-2-2-2-2-3-2-2-2-2-2-2		144.59	3571	1198	252	2120	3753	7324	2024.07.15	Jeju, Republic of Korea
130	TH-KOR06	TH-KOR	L1-2-2-2-2-2-3-2-2-2-1-1		125.52	3521	1160	247	2114	3699	7220	2024.07.15	Jeju, Republic of Korea
131	TH-KOR07	TH-KOR	L1-2-2-2-2-2-3-2-2-2-2-1		129.5	3489	1175	288	2026	3674	7163	2024.07.16	Jeju, Republic of Korea
132	TH-KOR08	TH-KOR	L1-2-2-2-2-2-3-2-2-2-1-2		133.57	3559	1169	258	2131	3742	7301	2024.07.15	Jeju, Republic of Korea
133	UKN01	UKN	L2-2-2-1-2	Chiquita	134.89	1119	905	86	129	1192	2311	2024.03.03
134	UKN02	UKN	L2-2-2-1-1	Dole	134.8	1515	1039	78	397	1608	3123	2024.03.03
135	VNM01	VNM	L1-2-2-2-2-2-2-1-1	Dole	126.16	2727	1008	139	1580	2866	5593	2023.02
136	VNM02	VNM	L1-2-2-2-2-2-2-1-2-2	Dole	169.27	2955	975	158	1821	3089	6044	2023.08
137	VNM03	VNM	L1-2-2-2-2-2-2-1-2-1	Dole	154.13	3000	1042	162	1796	3138	6138	2023.08
138	VNM04	VNM	L1-2-2-2-1	Stellana	168.73	2198	868	170	1159	2317	4515	2023.12
139	VNM05	VNM	L1-2-2-2-2-2-3-2-1-1	KDA	172.15	2691	1033	180	1478	2821	5512	2023.12
140	VNM06	VNM	L1-2-2-2-2-1	Dole	196.11	2630	926	146	1558	2744	5374	2025.01.21
141	VNM07	VNM	L1-2-2-2-2-2-2-2-2-2	Lotte	175.84	2617	1019	165	1432	2752	5369	2025.01.21
142	VNM08	VNM	L2-1-1-2	Dalat Laba King	156.4	879	736	56	87	945	1824	2025.04.18
143	VNM09	VNM	L1-2-1-2-2-1	Dole	208.5	1150	838	63	249	1197	2347	2025.04.18
144	VNM10	VNM	L1-2-2-2-2-2-2-2-1	VIB	244.3	2524	1008	167	1349	2674	5198	2025.04.15
